# Supplementary material for: Penta- versus hexa-coordinated iridium catalysts control the reactivity of the direct reductive amination between aliphatic amines and aliphatic ketones: a DFT-guided mechanism
Source: Royal Society of Chemistry journal article supplement (doi:10.1039/d4cy00516c), 2024-01-01

**Penta- *versus* hexa-coordinated iridium catalysts control the reactivity of the direct reductive amination between both aliphatic amines and ketones: a DFT-guided mechanism**

Hao Lin,<sup>a</sup> Longfei Li,<sup>\*a</sup> Lanbo Liu,<sup>a</sup> Zhihui Li,<sup>a</sup> Thi-Mo Nguyen,<sup>b</sup> Matthieu Jouffroy<sup>c</sup> and Rafael Gramage-Doria<sup>\*b</sup>

a. College of Pharmacy, Key Laboratory of Pharmaceutical Quality Control of Hebei Province, Key Laboratory of Medicinal Chemistry and Molecular Diagnosis of Ministry of Education, Hebei University, Baoding 071002, Hebei (P. R. China).

E-mail: lilongfei@hbu.edu.cn

b. Univ. Rennes, CNRS, ISCR-UMR6226, 35000 Rennes (France).

E-mail: rafael.gramage-doria@univ-rennes1.fr

c. Chemical Process R&D, Discovery Process Research, Janssen Pharmaceutica N.V., Turnhoutseweg 30, 2340 Beerse (Belgium)

## TABLE OF CONTENTS

|                                                                                                                                                               |      |
|---------------------------------------------------------------------------------------------------------------------------------------------------------------|------|
| 1. Computational methods and results.....                                                                                                                     | S3   |
| 2. Additional figures.....                                                                                                                                    | S6   |
| 3. The formation of the associated complexes between the methanol solvent molecule and TFA derivatives.....                                                   | S11  |
| 4. The pathway computed at $\omega$ B97X-D/def2-TZVPP// $\omega$ B97X-D/def2-SVP.....                                                                         | S12  |
| 5. The pathway computed at 298.15 K and 50 atm.....                                                                                                           | S20  |
| 6. The structures and NBO analysis for rationalizing the computed energy barrier results for the rate-determining the hydride transfer transition states..... | S29  |
| 7. Experimental part.....                                                                                                                                     | S237 |
| 8. References.....                                                                                                                                            | S239 |
| 9. NMR data.....                                                                                                                                              | S240 |

## 1. Computational methods and results.

**Table S1.** The computed potential energies ( $E$ , a.u.) and relative potential energies ( $\Delta E$ , kcal/mol) at the  $\omega$ B97X-D/BS-II level. The relative Gibbs energies ( $\Delta G$ ; at 298.15 K and 1 atm) are in kcal/mol.

| Complex               | $E$        | $\Delta E$ | $G$        | $\Delta G$ |
|-----------------------|------------|------------|------------|------------|
| A1                    | -908.1088  | 0.0        | -2437.2736 | 0.0        |
| A2                    | -1434.9651 | -18.2      | -1434.6103 | 7.1        |
| A3                    | -1434.9913 | -34.7      | -1434.6276 | -3.8       |
| A4                    | -908.1275  | -11.7      | -907.7958  | 4.6        |
| 3'                    | -832.1452  | -26.4      | -831.8255  | -23.5      |
| 3''                   | -831.6687  | -4.1       | -831.3633  | -1.7       |
| TS <sub>A2-A3</sub>   | -1434.9596 | -14.8      | -1434.6030 | 11.6       |
| TS <sub>A4-3'</sub>   | -1434.9646 | -17.9      | -1434.6067 | 9.3        |
| B1                    | -2694.7487 | -26.4      | -2694.0908 | -23.5      |
| B2                    | -2694.0174 | -36.8      | -2693.3717 | -36.5      |
| B3                    | -2695.1963 | -38.8      | -2694.5311 | -25.3      |
| TS <sub>B1-B2</sub>   | -3526.8849 | -20.8      | -3525.8855 | -4.2       |
| TS <sub>B3-B1'</sub>  | -3221.5838 | -39.5      | -3220.9043 | -14.3      |
| C1                    | -3221.1436 | -31.8      | -3220.4748 | -19.3      |
| C2                    | -3220.4204 | -47.3      | -3219.7549 | -31.7      |
| C3                    | -3221.5981 | -48.5      | -3220.9145 | -20.7      |
| TS <sub>C1-C2</sub>   | -4053.2712 | -20.7      | -4052.2530 | 10.4       |
| TS <sub>C3-B1</sub>   | -3221.5851 | -40.3      | -3220.9056 | -15.1      |
| D1                    | -2695.9244 | -26.3      | -2695.2518 | -13.3      |
| D2                    | -3222.3201 | -32.2      | -3221.6349 | -4.2       |
| D3                    | -3222.2967 | -17.5      | -3221.6088 | 7.9        |
| D4                    | -2695.4453 | -2.3       | -2694.7867 | 10.2       |
| TS <sub>D2-D3</sub>   | -3222.2946 | -16.4      | -3221.6108 | 6.6        |
| TS <sub>D4-B1</sub>   | -3527.5825 | 2.7        | -3526.5777 | 31.9       |
| E1                    | -2829.2880 | -26.4      | -2828.7378 | -23.5      |
| E2                    | -2828.5392 | -25.9      | -2827.9929 | -20.3      |
| E3                    | -2829.7171 | -27.2      | -2829.1545 | -10.5      |
| TS <sub>E1-E2</sub>   | -3661.4142 | -14.5      | -3660.5178 | 5.0        |
| TS <sub>E3-E1</sub>   | -3356.1098 | -31.2      | -3355.5341 | -3.5       |
| F1                    | -3355.6946 | -39.1      | -3355.1248 | -21.1      |
| F2                    | -3354.9378 | -33.6      | -3354.3738 | -14.1      |
| F3                    | -3356.1398 | -50.0      | -3355.5557 | -17.0      |
| TS <sub>F1-F2</sub>   | -4187.8254 | -30.1      | -4186.9105 | 3.9        |
| TS <sub>F3-E1</sub>   | -3356.1240 | -40.1      | -3355.5446 | -10.1      |
| E2c                   | -2830.4613 | -24.8      | -2829.8945 | -10.6      |
| E3c                   | -3356.8596 | -32.3      | -3356.2750 | -4.2       |
| E4c                   | -3356.8379 | -18.7      | -3356.2535 | 9.4        |
| E5c                   | -2829.9828 | -1.2       | -2829.4284 | 13.6       |
| TS <sub>E2c-E3c</sub> | -3356.8363 | -17.7      | -3356.2550 | 8.4        |
| TS <sub>E5c-E1</sub>  | -3662.1299 | -2.4       | -3661.2277 | 30.1       |
| G1                    | -2623.4030 | -26.4      | -2622.6682 | -23.5      |
| G2                    | -2622.6690 | -35.2      | -2621.9343 | -27.2      |
| G3                    | -2623.8494 | -38.0      | -2623.0998 | -19.8      |
| TS <sub>G1-G2</sub>   | -3455.5331 | -16.9      | -3454.4496 | 4.2        |
| TS <sub>G3-G1</sub>   | -3150.2395 | -40.4      | -3149.4746 | -9.8       |
| H1                    | -3149.7954 | -30.2      | -3149.0415 | -12.6      |
| H2                    | -3149.0538 | -34.2      | -3148.3026 | -13.1      |
| H3                    | -3150.2500 | -47.0      | -3149.4827 | -14.9      |
| TS <sub>H1-H2</sub>   | -3981.9223 | -18.8      | -3980.8175 | 18.6       |
| TS <sub>H3-G1</sub>   | -3150.2388 | -39.9      | -3149.4746 | -9.8       |
| G2c                   | -2624.5838 | -29.5      | -2623.8321 | -15.1      |
| G3c                   | -3150.9796 | -35.5      | -3150.2114 | -7.9       |
| G4c                   | -3150.9567 | -21.1      | -3150.1843 | 9.1        |
| G5c                   | -2624.1034 | -4.7       | -2623.3614 | 12.0       |
| TS <sub>G2c-G3c</sub> | -3150.9552 | -20.1      | -3150.1882 | 6.6        |
| TS <sub>G5c-G1</sub>  | -3456.2416 | -0.3       | -3455.1555 | 31.7       |
| I1                    | -2483.4123 | -26.4      | -2482.9369 | -23.5      |
| I2                    | -2482.6713 | -30.8      | -2482.2008 | -25.8      |
| I3                    | -2483.8542 | -35.2      | -2483.3651 | -17.7      |

|                             |            |       |            |       |
|-----------------------------|------------|-------|------------|-------|
| <b>TS<sub>I1-I2</sub></b>   | -3315.5640 | -30.5 | -3314.7363 | -7.1  |
| <b>TS<sub>I3-I1</sub></b>   | -3010.2437 | -37.2 | -3009.7384 | -6.8  |
| <b>J1</b>                   | -3009.8152 | -36.8 | -3009.3181 | -17.5 |
| <b>J2</b>                   | -3009.0855 | -48.2 | -3008.5952 | -28.1 |
| <b>J3</b>                   | -3010.2648 | -50.4 | -3009.7549 | -17.1 |
| <b>TS<sub>J1-J2</sub></b>   | -3841.9700 | -42.8 | -3841.1222 | -4.1  |
| <b>TS<sub>J3-I1</sub></b>   | -3010.2527 | -42.8 | -3009.7472 | -12.3 |
| <b>I2c</b>                  | -2484.5960 | -31.3 | -2484.1026 | -16.2 |
| <b>I3c</b>                  | -3010.9919 | -37.3 | -3010.4818 | -9.0  |
| <b>I4c</b>                  | -3010.9781 | -28.7 | -3010.4648 | 1.7   |
| <b>I5c</b>                  | -2484.1242 | -11.9 | -2483.6412 | 5.0   |
| <b>TS<sub>I2c-I3c</sub></b> | -3010.9734 | -25.7 | -3010.4638 | 2.3   |
| <b>TS<sub>I5c-I1</sub></b>  | -3316.2798 | -18.4 | -3315.4483 | 16.5  |
| <b>A3'</b>                  | -908.5816  | -20.0 | -908.2316  | -0.5  |
| <b>TS<sub>A3'-3'</sub></b>  | -908.5180  | 19.8  | -908.1749  | 35.0  |
| <b>TS<sub>A3*-3'</sub></b>  | -1435.3810 | -2.6  | -1435.0044 | 28.1  |

**Table S2.** The imaginary frequencies (in  $\text{cm}^{-1}$ ) of transition states at the  $\omega\text{B97X-D/BS-I}$  level.

| Complex               | Imaginary frequencies (in $\text{cm}^{-1}$ ) |
|-----------------------|----------------------------------------------|
| TS <sub>A2-A3</sub>   | 100.6 <i>i</i>                               |
| TS <sub>A4-3'</sub>   | 280.6 <i>i</i>                               |
| TS <sub>B1-B2</sub>   | 980.2 <i>i</i>                               |
| TS <sub>B3-B1</sub>   | 1105.2 <i>i</i>                              |
| TS <sub>C2-C3</sub>   | 1036.2 <i>i</i>                              |
| TS <sub>C4-C1</sub>   | 1052.6 <i>i</i>                              |
| TS <sub>D3-D4</sub>   | 1138.4 <i>i</i>                              |
| TS <sub>D5-D1</sub>   | 1076.8 <i>i</i>                              |
| TS <sub>E1-E2</sub>   | 782.5 <i>i</i>                               |
| TS <sub>E3-E1</sub>   | 1063.6 <i>i</i>                              |
| TS <sub>F1-F2</sub>   | -831.5 <i>i</i>                              |
| TS <sub>F3-E1</sub>   | 1296.8 <i>i</i>                              |
| TS <sub>E3c-E4c</sub> | 1149.2 <i>i</i>                              |
| TS <sub>E5c-E1</sub>  | 735.6 <i>i</i>                               |
| TS <sub>G1-G2</sub>   | 1081.1 <i>i</i>                              |
| TS <sub>G3-G1</sub>   | 1131.5 <i>i</i>                              |
| TS <sub>H1-H2</sub>   | 1084.4 <i>i</i>                              |
| TS <sub>H3-G1</sub>   | 1003.4 <i>i</i>                              |
| TS <sub>G3c-G4c</sub> | 1157.6 <i>i</i>                              |
| TS <sub>G5c-G1</sub>  | 837.4 <i>i</i>                               |
| TS <sub>I1-I2</sub>   | 585.6 <i>i</i>                               |
| TS <sub>I3-I1</sub>   | 883.9 <i>i</i>                               |
| TS <sub>J1-J2</sub>   | 869.2 <i>i</i>                               |
| TS <sub>J3-I1</sub>   | 1231.2 <i>i</i>                              |
| TS <sub>I3c-I4c</sub> | 1266.7 <i>i</i>                              |
| TS <sub>I5c-I1</sub>  | 633.7 <i>i</i>                               |
| TS <sub>A3'-3'</sub>  | 285.4 <i>i</i>                               |
| TS <sub>A3*-3'</sub>  | 1554.0 <i>i</i>                              |

2. Additional figures.

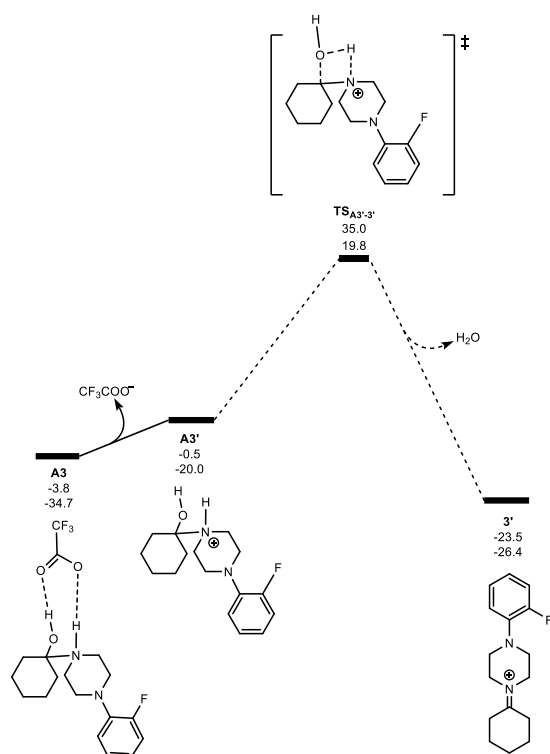

Fig. S1. Alternative formation of iminium **3'** without involving TFA in the transition state.

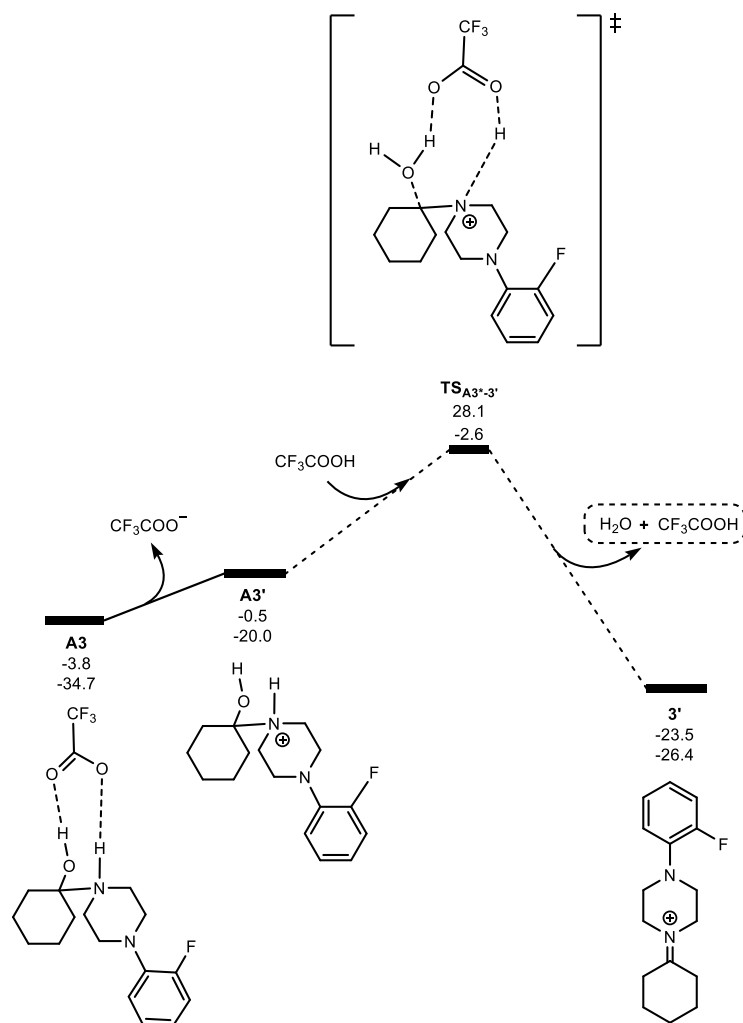

Fig. S2. Alternative formation of iminium **3'** involving a cationic, protonated aminoalcohol.

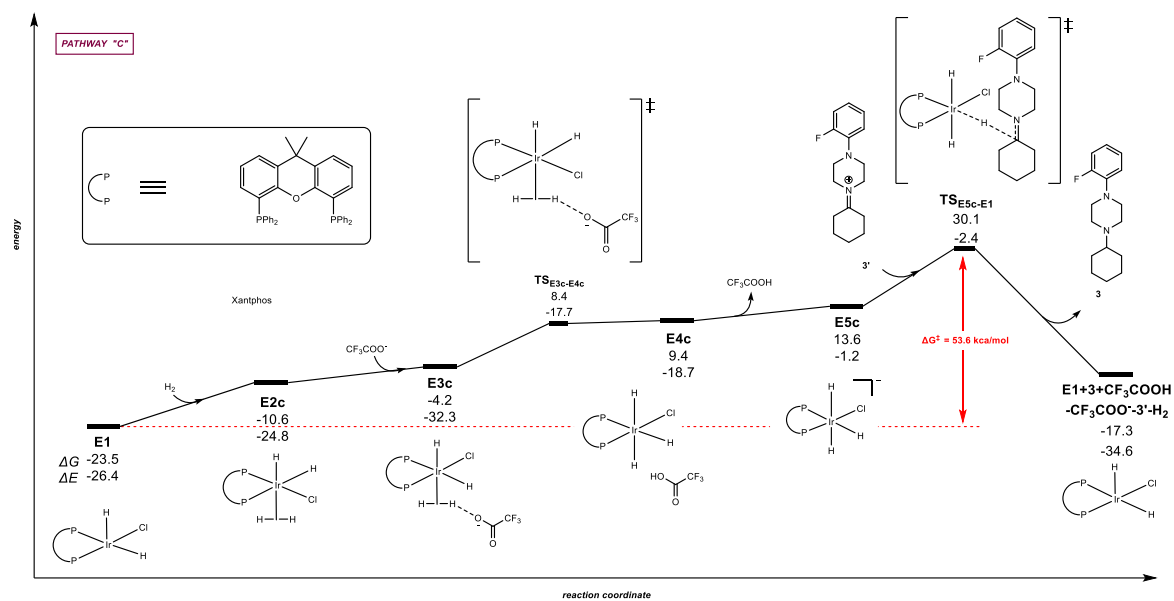

**Fig. S3.** Pathway "C": reaction coordinate for the trifluoroacetate-mediated, hydride/hydrogen transfer pathway occurring in a hexa-coordinated iridium complex **E2c** with initial H<sub>2</sub> activation. The relative Gibbs free energy ( $\Delta G$ ) and potential energy ( $\Delta E$ ) are reported in kcal/mol. P-P: diphosphane ligand Xantphos.



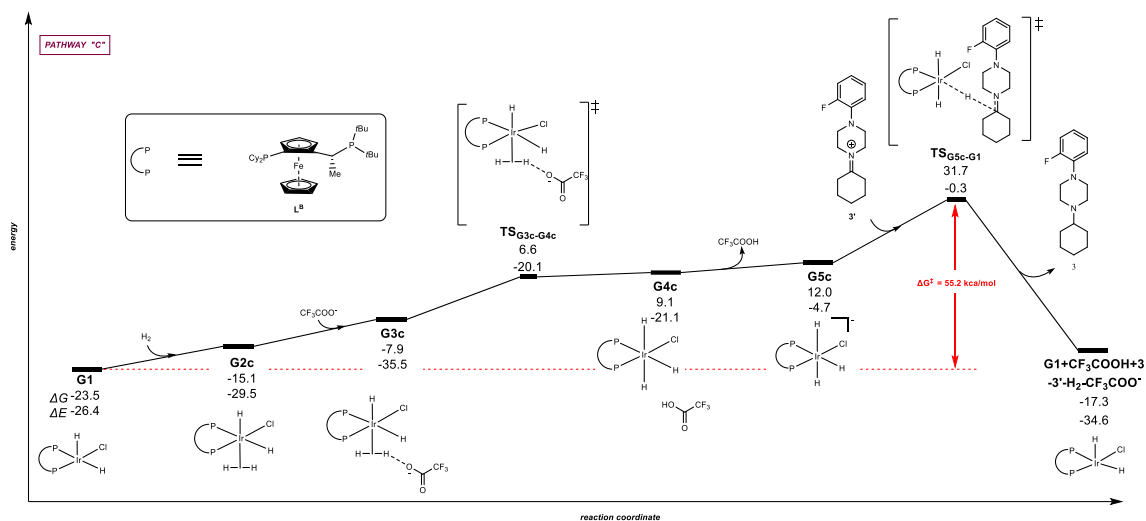

**Fig. S4.** Pathway "C": reaction coordinate for the trifluoroacetate-mediated, hydride/hydrogen transfer pathway occurring in a hexa-coordinated iridium complex **G2c** with initial H<sub>2</sub> activation. The relative Gibbs free energy ( $\Delta G$ ) and potential energy ( $\Delta E$ ) are reported in kcal/mol. P-P: diphosphane ligand **L<sup>B</sup>**.

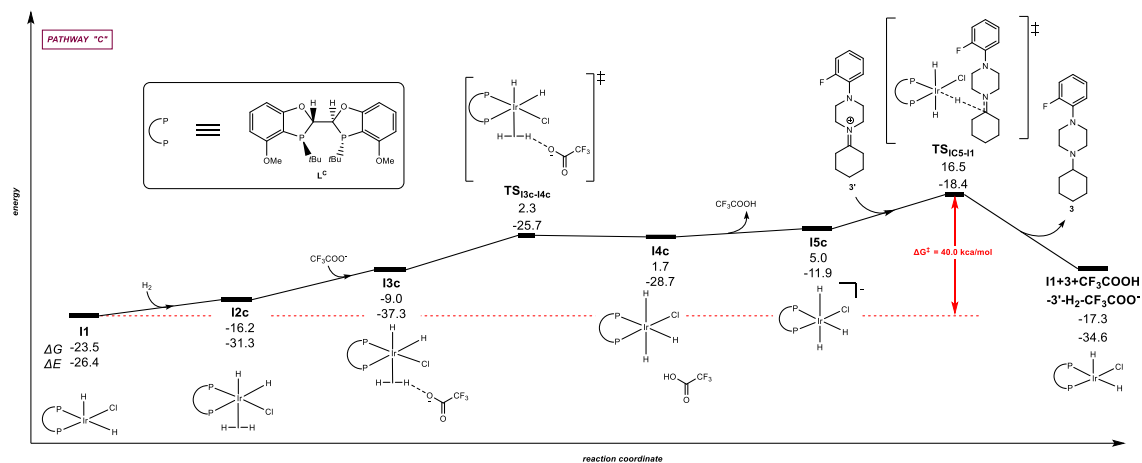

**Fig. S5.** Pathway "C": reaction coordinate for the trifluoroacetate-mediated, hydride/hydrogen transfer pathway occurring in a hexa-coordinated iridium complex **I2c** with initial H<sub>2</sub> activation. The relative Gibbs free energy ( $\Delta G$ ) and potential energy ( $\Delta E$ ) are reported in kcal/mol. P-P: diphosphane ligand L<sup>c</sup>.

### 3. The formation of the associated complexes between the methanol solvent molecule and TFA derivatives

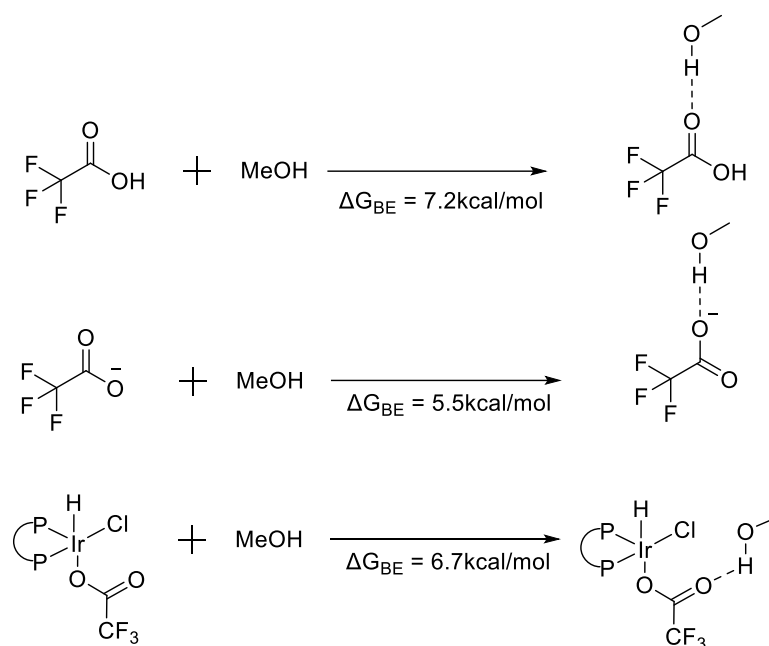

**Fig. S6.** The formation of the associated complexes between the methanol solvent molecule and TFA derivatives ( $\text{CF}_3\text{COOH}$ ,  $\text{CF}_3\text{COO}^-$ , TFA-derived metal complex). The binding free energies ( $\Delta G_{BE}$ ) were computed at (SMD: methanol)  $\omega\text{B97X-D}/6-311++\text{G}(2\text{d}, \text{p})/\text{SDD}(\text{Ir}, \text{Fe})//\omega\text{B97X-D}/6-311\text{G}(\text{d}, \text{p})/\text{SDD}(\text{Ir}, \text{Fe})$  level.

The formation of the hydrogen-bond complexes between the methanol solvent molecule and TFA derivatives ( $\text{CF}_3\text{COOH}$ ,  $\text{CF}_3\text{COO}^-$ , TFA-derived metal complex) are endothermic reactions, suggesting TFA derivatives can not form associated complexes. The addition of solvent molecules could cause to estimate the energy wrongly.

#### 4. The pathway computed at $\omega$ B97X-D/def2-TZVPP// $\omega$ B97X-D/def2-SVP.

The geometric structures in methanol solution were optimized using def2-SVP basis sets, and the def2-TZVPP basis sets were further used for single point energy refinements. The refined energies were then corrected to Gibbs energies at 298.15 K and 1 atm by using the  $\omega$ B97X-D/def2-SVP harmonic frequencies. The solvent effect was evaluated using SMD (density-based solution model) solvation model.

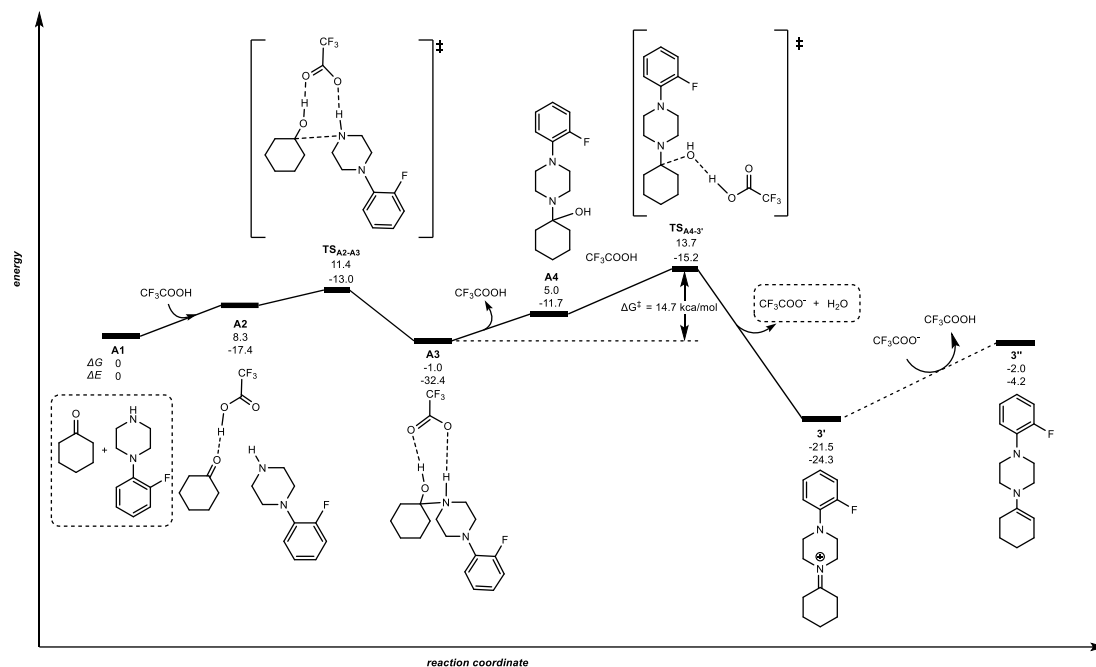

**Fig. S7.** Reaction coordinate for the TFA-mediated condensation of ketone **1** and amine **2**. The relative Gibbs free energy ( $\Delta G$ ) and potential energy ( $\Delta E$ ) are reported in kcal/mol. Computational method: (SMD:methanol) $\omega$ B97X-D/def2-TZVPP // $\omega$ B97X-D/def2-SVP.

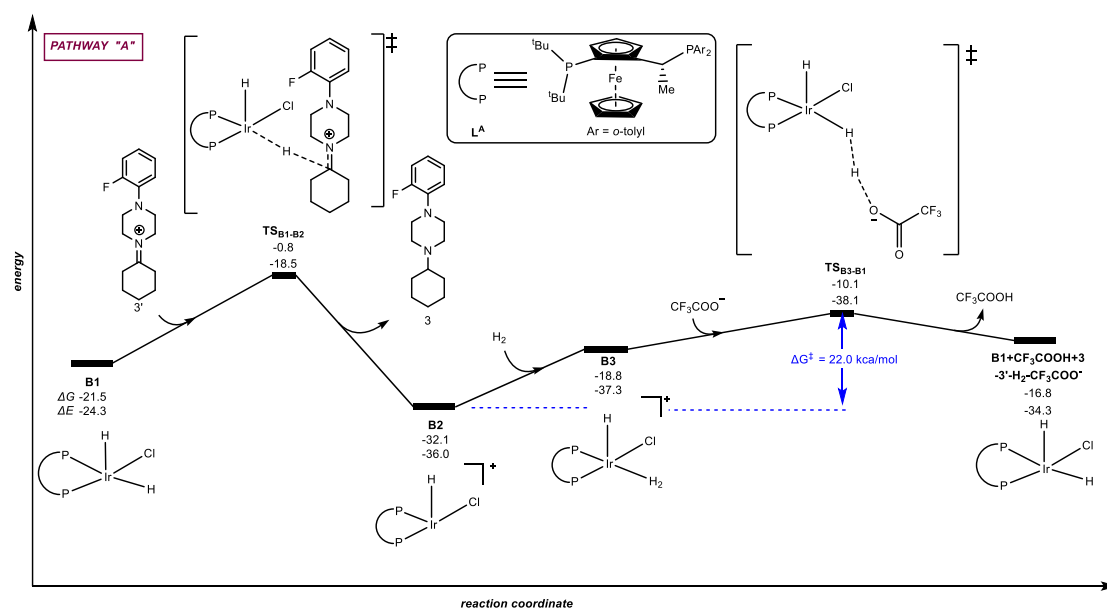

**Fig. S8.** Pathway "A": reaction coordinate for the hydride/hydrogen transfer pathway occurring in a penta-coordinated iridium complex **B1**. The relative Gibbs free energy ( $\Delta G$ ) and potential energy ( $\Delta E$ ) are reported in kcal/mol. P-P: diphosphane ligand **L<sup>A</sup>**. Computational method: (SMD:methanol) $\omega$ B97X-D/def2-TZVPP // $\omega$ B97X-D/def2-SVP.

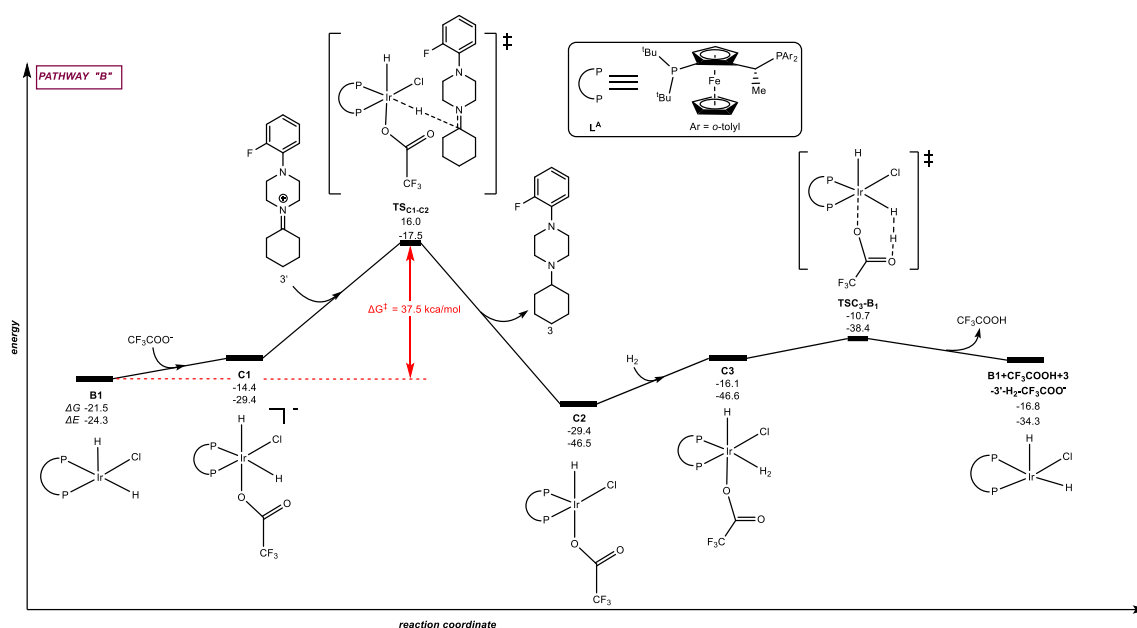

**Fig. S9.** Pathway "B": reaction coordinate for the trifluoroacetate-mediated, hydride/hydrogen transfer pathway occurring in a hexa-coordinated iridium complex **C1**. The relative Gibbs free energy ( $\Delta G$ ) and potential energy ( $\Delta E$ ) are reported in kcal/mol. P-P: diphosphane ligand **L<sup>A</sup>**. Computational method: (SMD:methanol) $\omega$ B97X-D/def2-TZVPP // $\omega$ B97X-D/def2-SVP.

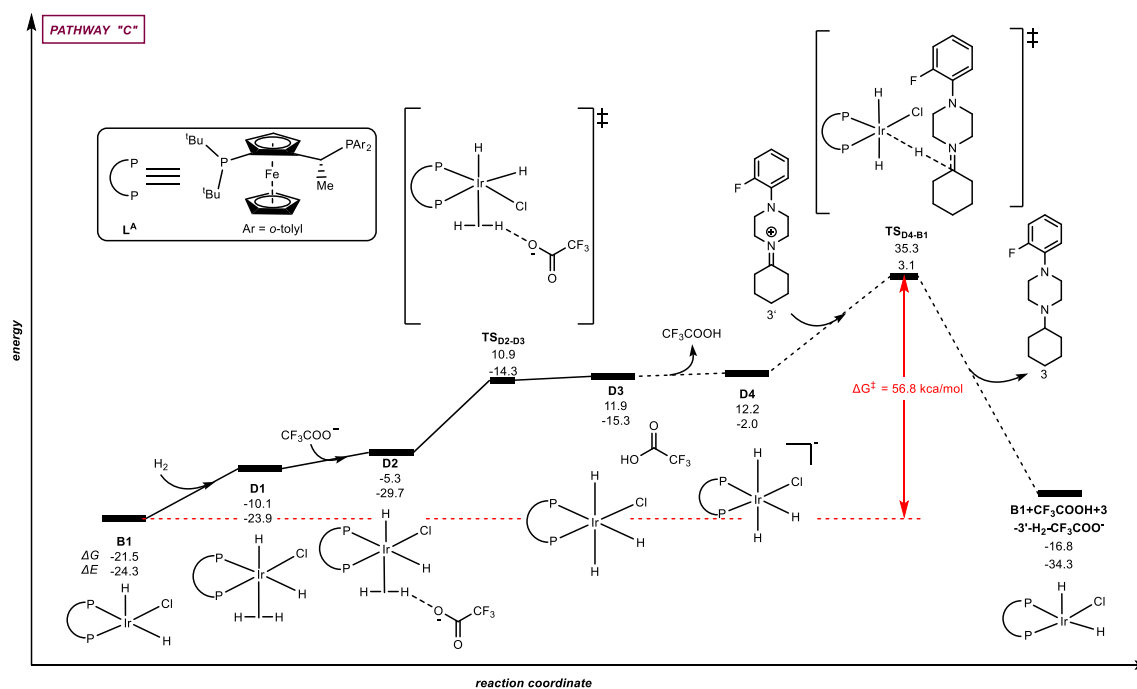

**Fig. S10.** Pathway "C": reaction coordinate for the trifluoroacetate-mediated, hydride/hydrogen transfer pathway occurring in a hexa-coordinated iridium complex **D1** with initial H<sub>2</sub> activation. The relative Gibbs free energy ( $\Delta G$ ) and potential energy ( $\Delta E$ ) are reported in kcal/mol. P-P: diphosphane ligand **L<sup>A</sup>**. Computational method: (SMD:methanol) $\omega$ B97X-D/def2-TZVPP // $\omega$ B97X-D/def2-SVP.

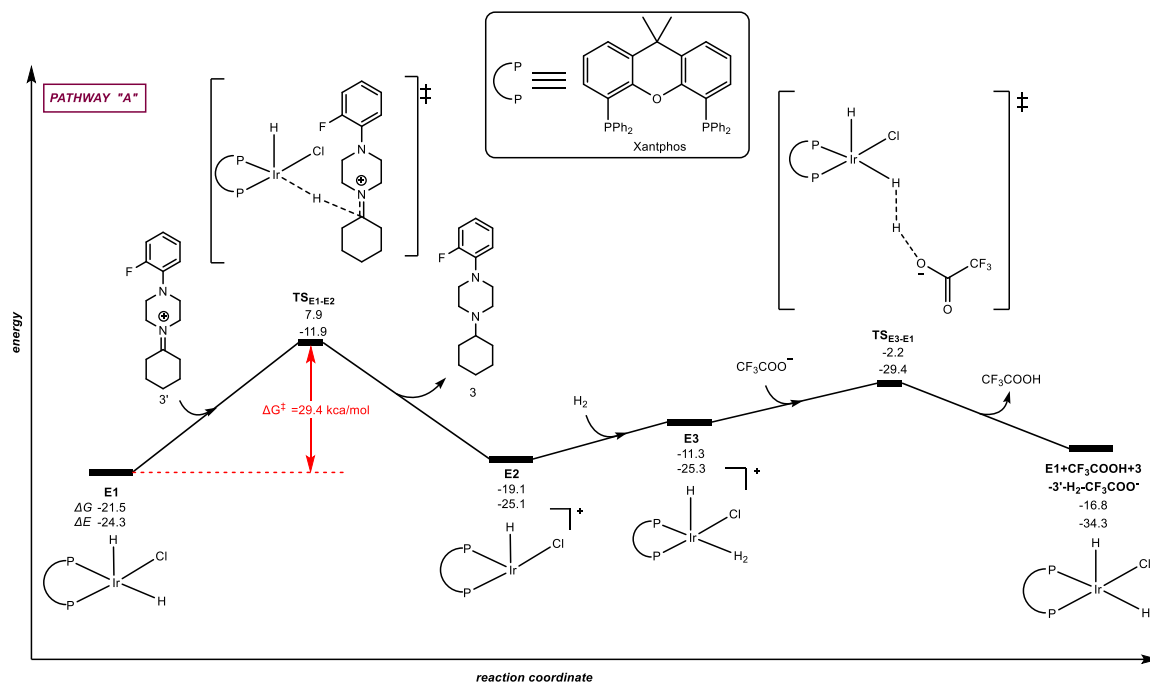

**Fig. S11.** Pathway "A": reaction coordinate for the hydride/hydrogen transfer pathway occurring in a penta-coordinated iridium complex **E1**. The relative Gibbs free energy ( $\Delta G$ ) and potential energy ( $\Delta E$ ) are reported in kcal/mol. P-P: diphosphane ligand Xantphos. Computational method: (SMD:methanol) $\omega$ B97X-D/def2-TZVPP// $\omega$ B97X-D/def2-SVP.

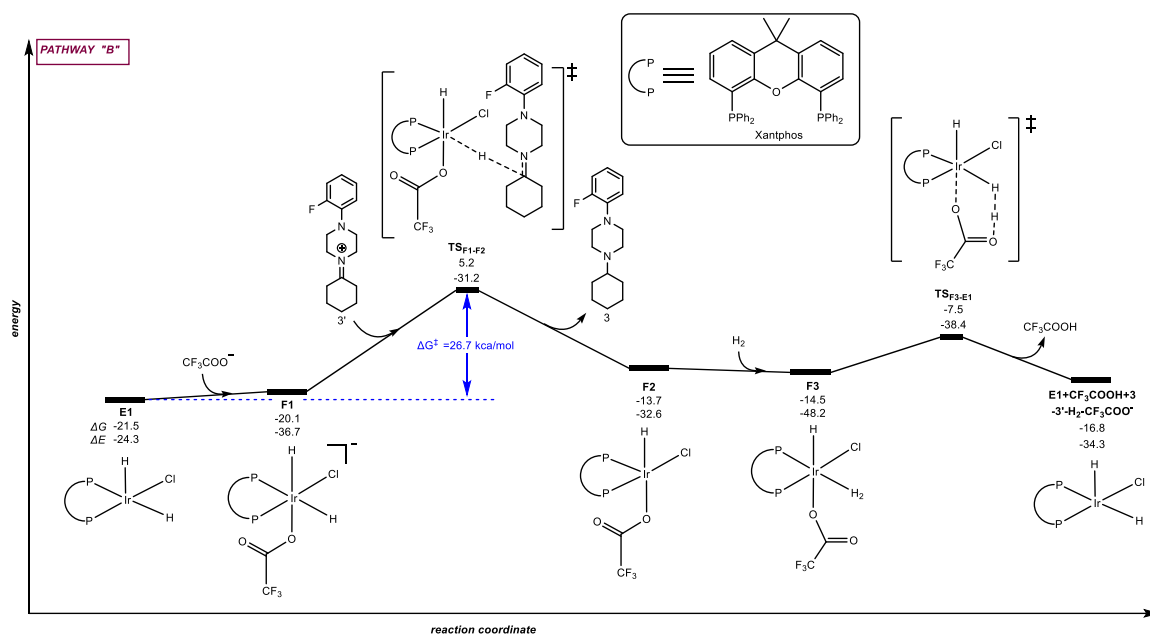

**Fig. S12.** Pathway "B": reaction coordinate for the trifluoroacetate-mediated, hydride/hydrogen transfer pathway occurring in a hexa-coordinated iridium complex **F1**. The relative Gibbs free energy ( $\Delta G$ ) and potential energy ( $\Delta E$ ) are reported in kcal/mol. P-P: diphosphane ligand Xantphos. Computational method: (SMD:methanol) $\omega$ B97X-D/def2-TZVPP// $\omega$ B97X-D/def2-SVP.

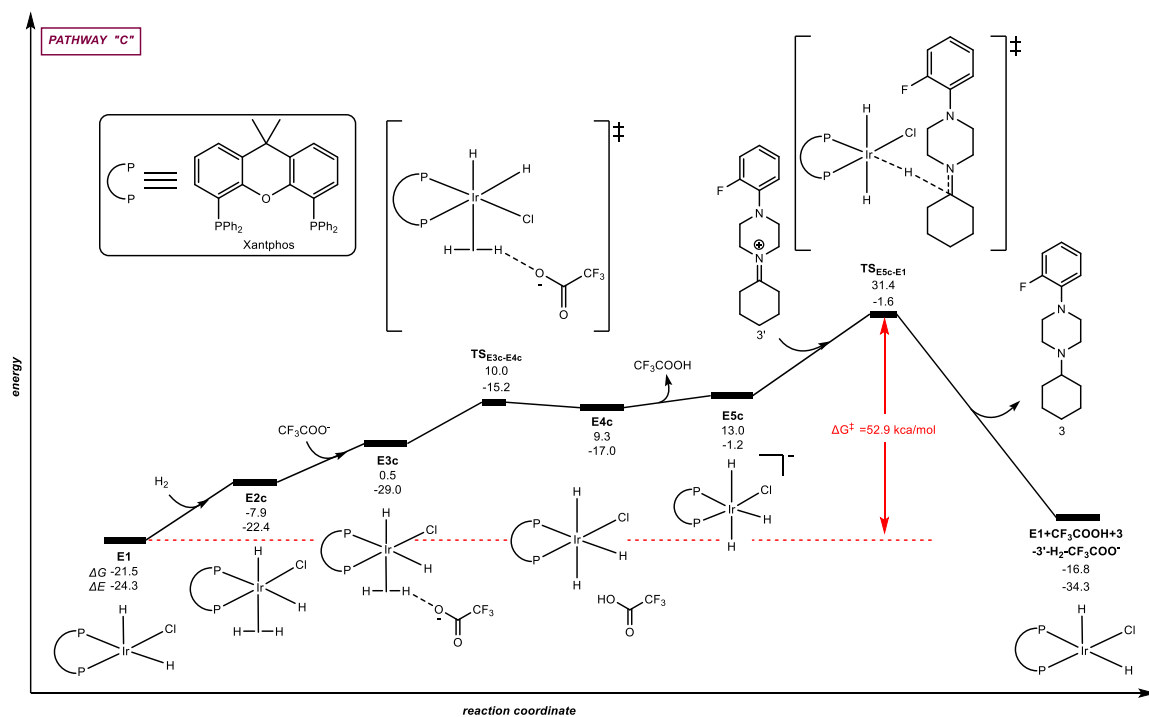

**Fig. S13.** Pathway "C": reaction coordinate for the trifluoroacetate-mediated, hydride/hydrogen transfer pathway occurring in a hexa-coordinated iridium complex **E2c** with initial  $\text{H}_2$  activation. The relative Gibbs free energy ( $\Delta G$ ) and potential energy ( $\Delta E$ ) are reported in kcal/mol. P-P: diphosphane ligand Xantphos. Computational method: (SMD:methanol) $\omega$ B97X-D/def2-TZVPP// $\omega$ B97X-D/def2-SVP.

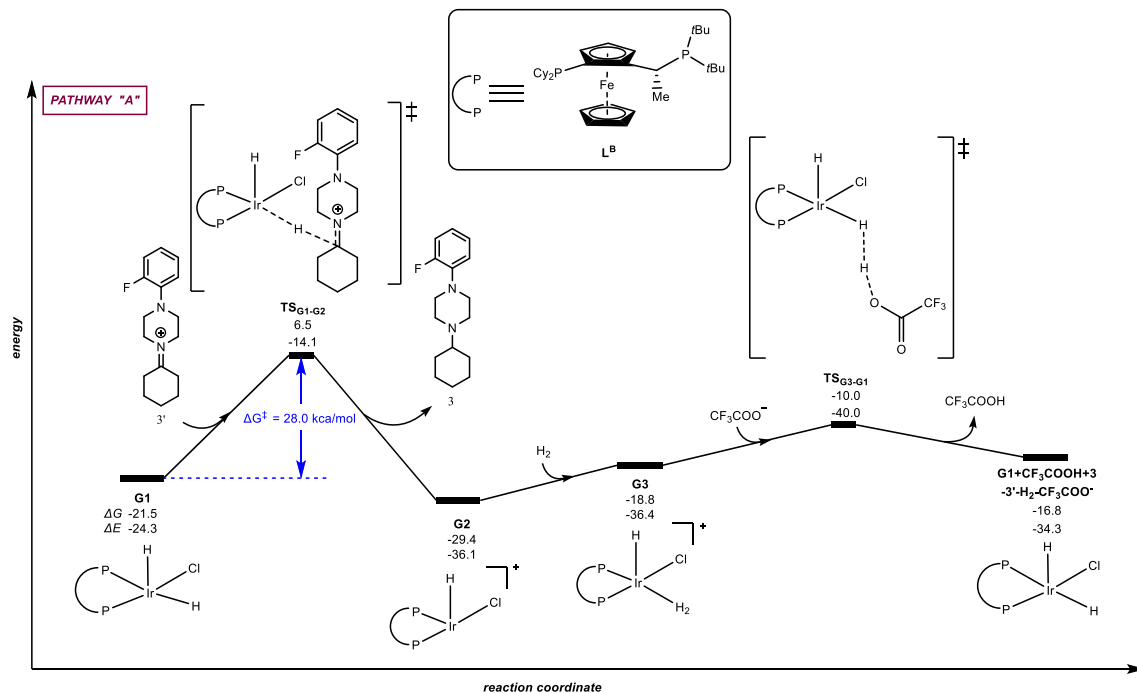

**Fig. S14.** Pathway "A": reaction coordinate for the hydride/hydrogen transfer pathway occurring in a penta-coordinated iridium complex **G1**. The relative Gibbs free energy ( $\Delta G$ ) and potential energy ( $\Delta E$ ) are reported in kcal/mol. P-P: diphosphane ligand  $\text{L}^{\text{B}}$ . Computational method: (SMD:methanol) $\omega$ B97X-D/def2-TZVPP// $\omega$ B97X-D/def2-SVP.

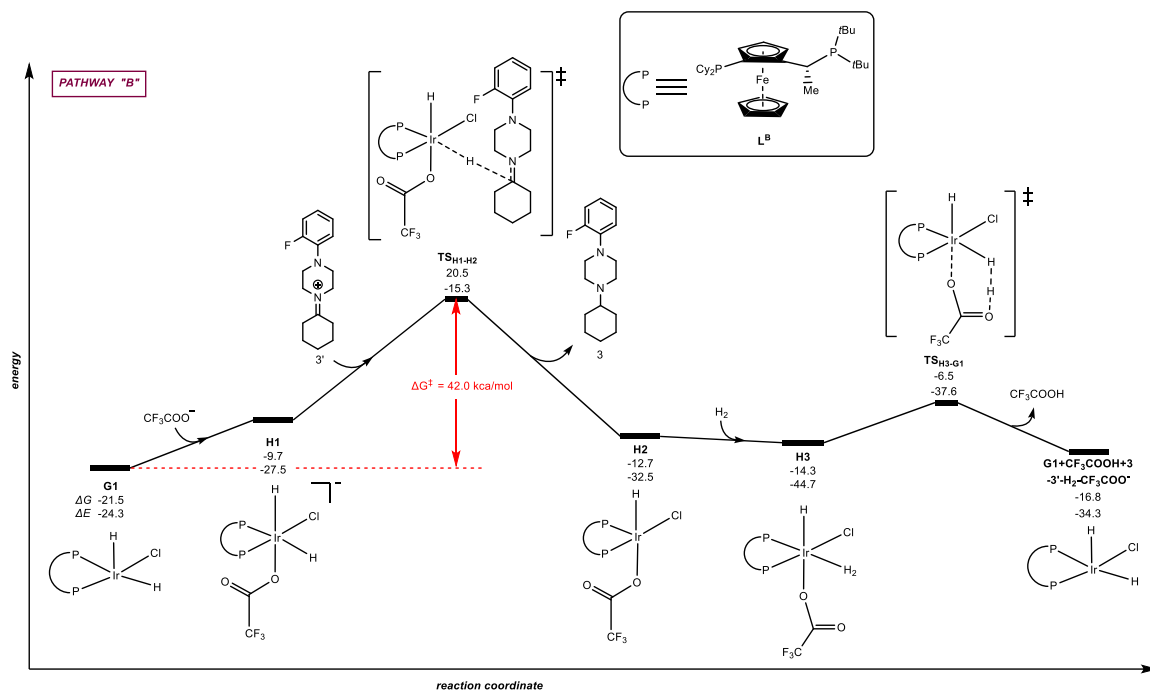

**Fig. S15.** Pathway "B": reaction coordinate for the trifluoroacetate-mediated, hydride/hydrogen transfer pathway occurring in a hexa-coordinated iridium complex **H1**. The relative Gibbs free energy ( $\Delta G$ ) and potential energy ( $\Delta E$ ) are reported in kcal/mol. P-P: diphosphane ligand **L<sup>B</sup>**. Computational method: (SMD:methanol) $\omega$ B97X-D/def2-TZVPP// $\omega$ B97X-D/def2-SVP.

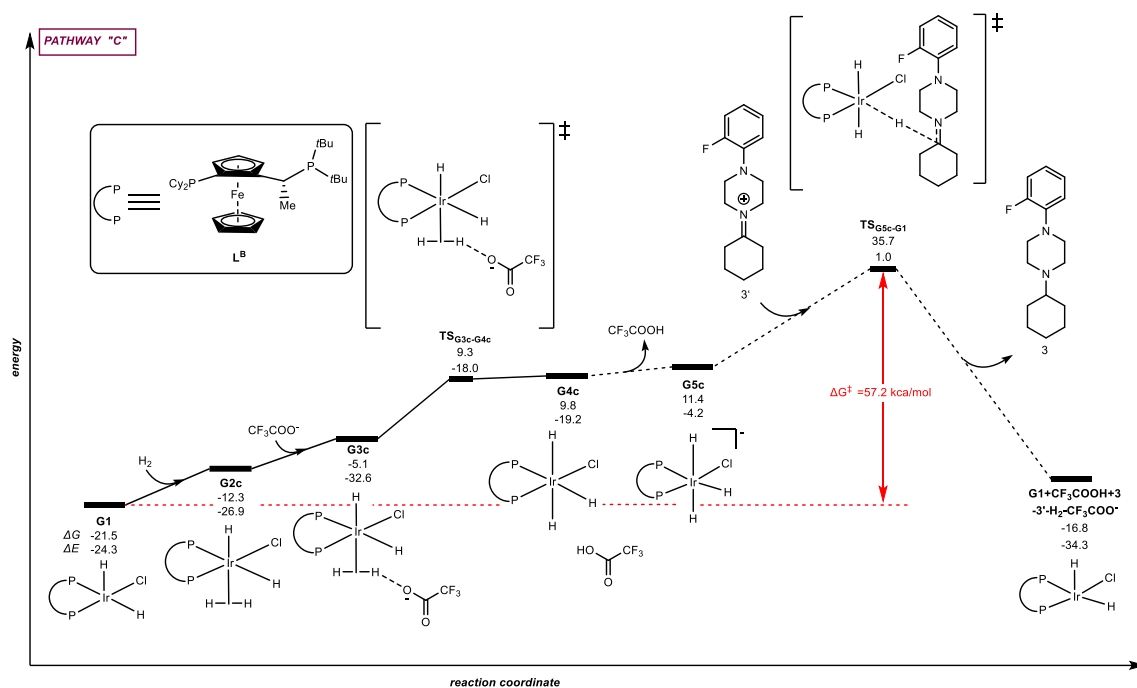

**Fig. S16.** Pathway "C": reaction coordinate for the trifluoroacetate-mediated, hydride/hydrogen transfer pathway occurring in a hexa-coordinated iridium complex **G2c** with initial H<sub>2</sub> activation. The relative Gibbs free energy ( $\Delta G$ ) and potential energy ( $\Delta E$ ) are reported in kcal/mol. P-P: diphosphane ligand **L<sup>B</sup>**. Computational method: (SMD:methanol) $\omega$ B97X-D/def2-TZVPP// $\omega$ B97X-D/def2-SVP.



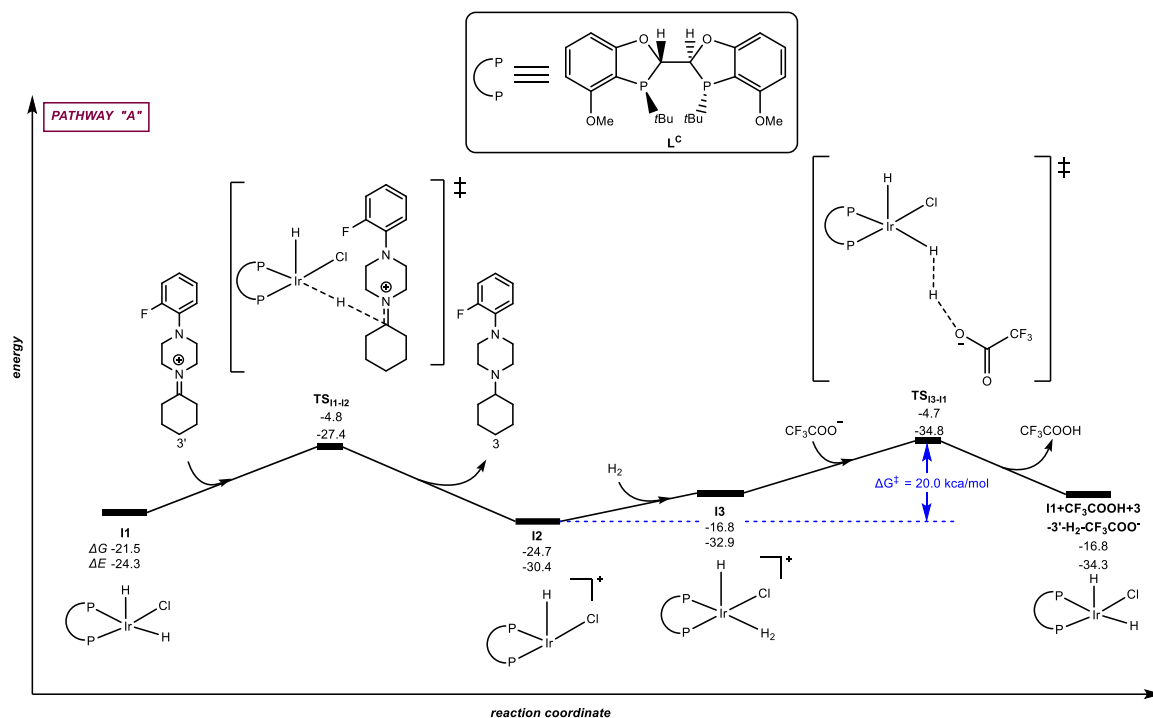

**Fig. S17.** Pathway "A": reaction coordinate for the hydride/hydrogen transfer pathway occurring in a penta-coordinated iridium complex **I1**. The relative Gibbs free energy ( $\Delta G$ ) and potential energy ( $\Delta E$ ) are reported in kcal/mol. P-P: diphosphane ligand **L<sup>c</sup>**. Computational method: (SMD:methanol) $\omega$ B97X-D/def2-TZVP// $\omega$ B97X-D/def2-SVP.

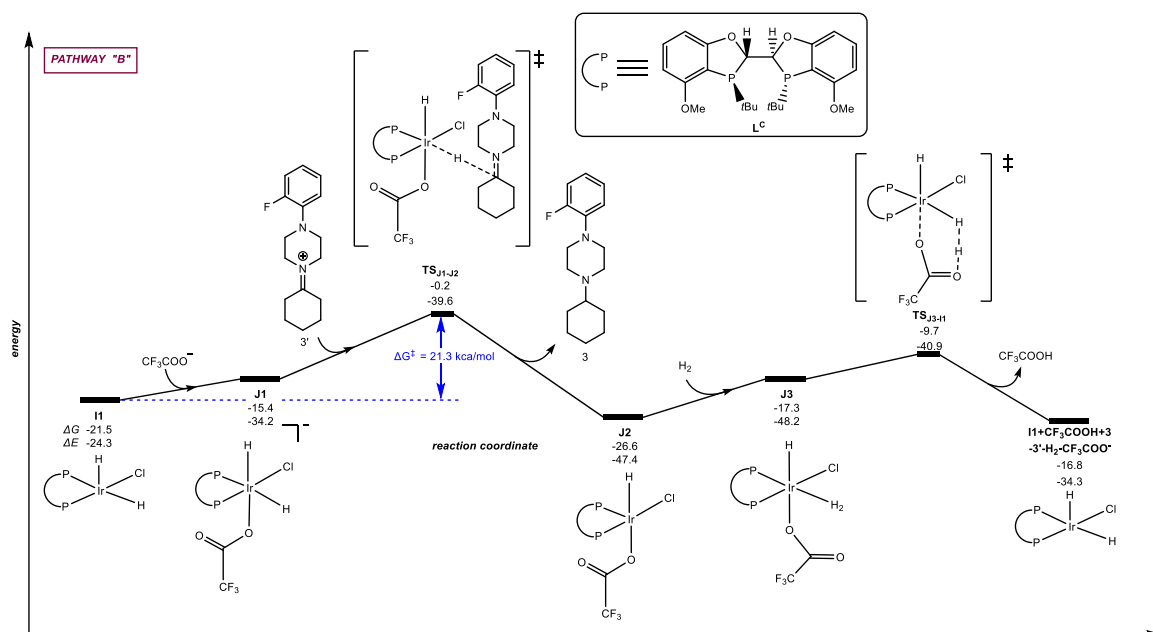

**Fig. S18.** Pathway "B": reaction coordinate for the trifluoroacetate-mediated, hydride/hydrogen transfer pathway occurring in a hexa-coordinated iridium complex **J1**. The relative Gibbs free energy ( $\Delta G$ ) and potential energy ( $\Delta E$ ) are reported in kcal/mol. P-P: diphosphane ligand **L<sup>c</sup>**. Computational method: (SMD:methanol) $\omega$ B97X-D/def2-TZVP// $\omega$ B97X-D/def2-SVP.

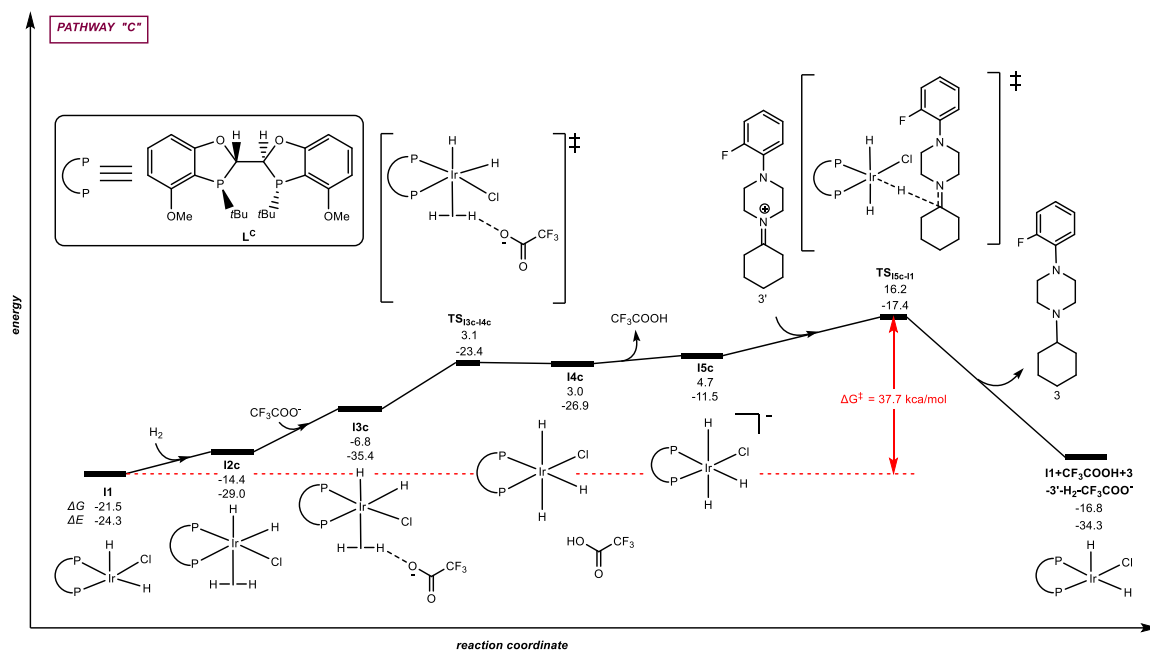

**Fig. S19.** Pathway "C": reaction coordinate for the trifluoroacetate-mediated, hydride/hydrogen transfer pathway occurring in a hexa-coordinated iridium complex **I2c** with initial  $\text{H}_2$  activation. The relative Gibbs free energy ( $\Delta G$ ) and potential energy ( $\Delta E$ ) are reported in kcal/mol. P-P: diphosphane ligand **L<sup>c</sup>**. Computational method: (SMD:methanol) $\omega$ B97X-D/def2-TZVPP// $\omega$ B97X-D/def2-SVP.

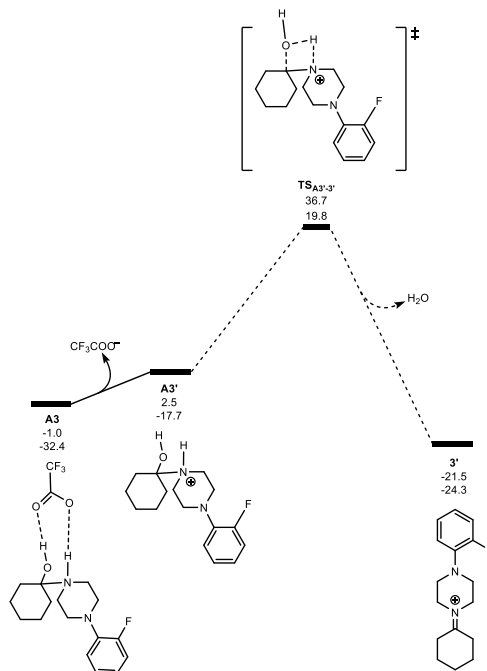

**Fig. S20.** Alternative formation of iminium **3'** without involving TFA in the transition state. Computational method: (SMD:methanol) $\omega$ B97X-D/def2-TZVPP// $\omega$ B97X-D/def2-SVP.

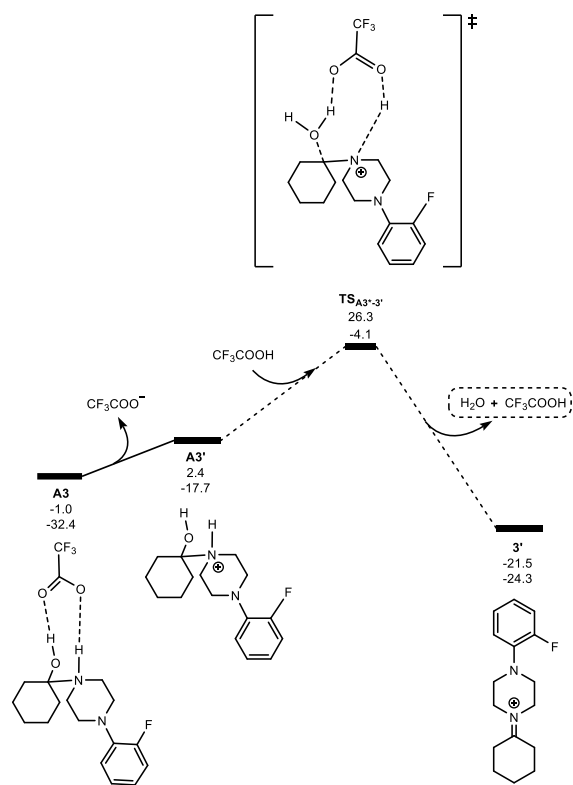

**Fig. S21** Alternative formation of iminium **3'** involving a cationic, protonated aminoalcohol. Computational method: (SMD:methanol) $\omega$ B97X-D/def2-TZVPP// $\omega$ B97X-D/def2-SVP.

#### 4. The pathway computed at 298.15 K and 50 atm

The geometric structures in methanol solution were optimized using BS-I base sets, in which 6-311G(d, p) basis sets were used for non-metallic atoms, and SDD basis sets with effective core potential were used for the iridium and Fe atoms. The BS-II basis sets were further used for single point energy optimization, in which 6-311++G(2d, p) basis sets were used for non-metallic atoms, and SDD basis sets with effective core potential were used for the iridium and Fe atoms. The contribution of thermal corrections and entropy to Gibbs free energies were obtained by using  $\omega$ B97X-D/BS-I methods. The refined energies were then corrected to Gibbs energies at 298.15 K and 50 atm by using the  $\omega$ B97X-D/BS-I harmonic frequencies.

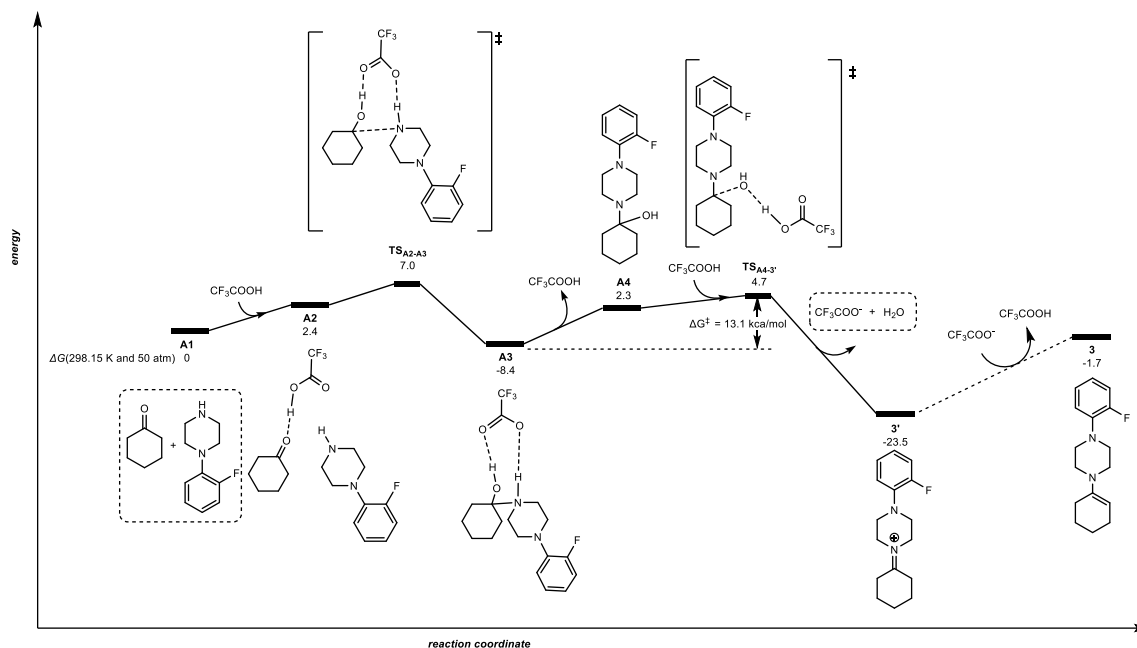

**Fig. S22.** Reaction pathway for the TFA-mediated condensation of ketone **1** and amine **2**. The relative Gibbs free energy ( $\Delta G$ ) are reported in kcal/mol at 298.15 K and 50 atm.

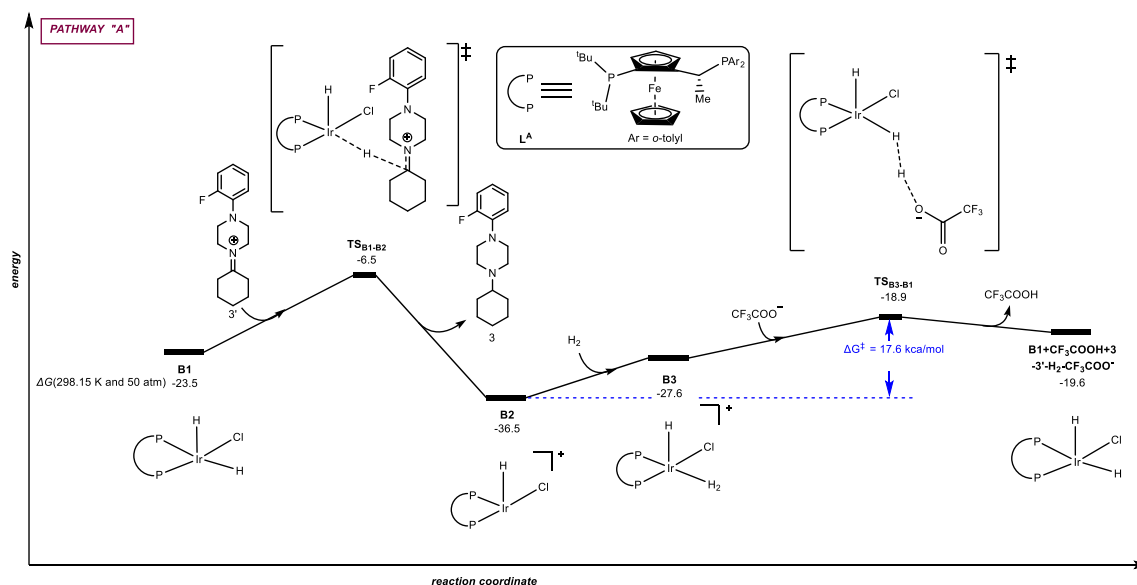

**Fig. S23.** Pathway "A": reaction coordinate for the hydride/hydrogen transfer pathway occurring in a penta-coordinated iridium complex **B1**. The relative Gibbs free energy ( $\Delta G$ ) are reported in kcal/mol at 298.15 K and 50 atm. P-P: diphosphane ligand  $L^A$ .

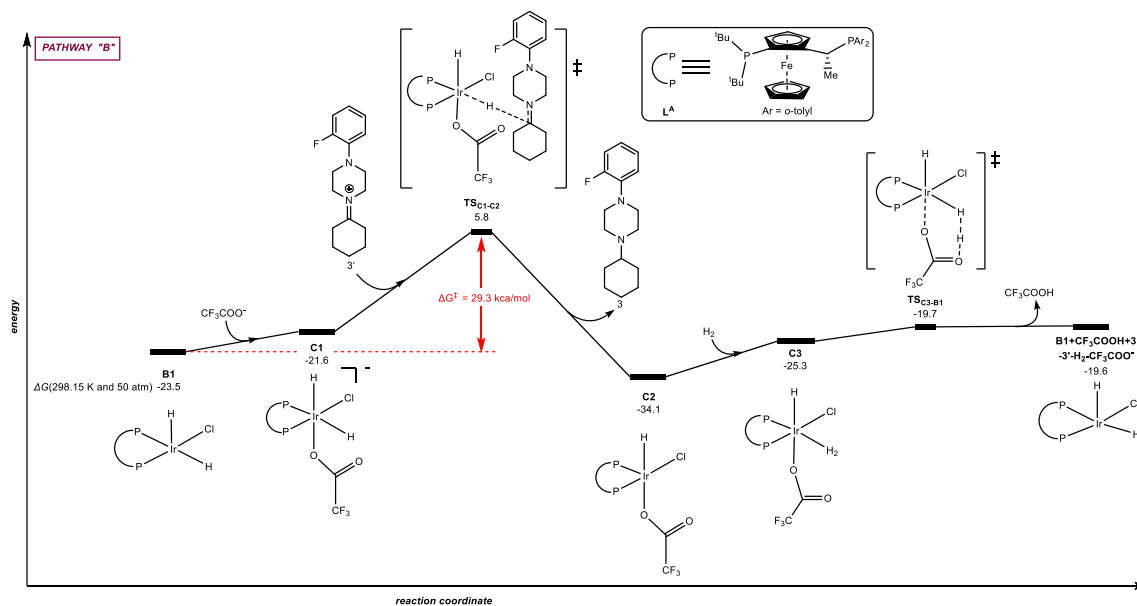

**Fig. S24.** Pathway “B”: reaction coordinate for the trifluoroacetate-mediated, hydride/hydrogen transfer pathway occurring in a hexa-coordinated iridium complex **C1**. The relative Gibbs free energy ( $\Delta G$ ) are reported in kcal/mol at 298.15 K and 50 atm. P-P: diphosphane ligand  $L^A$ .

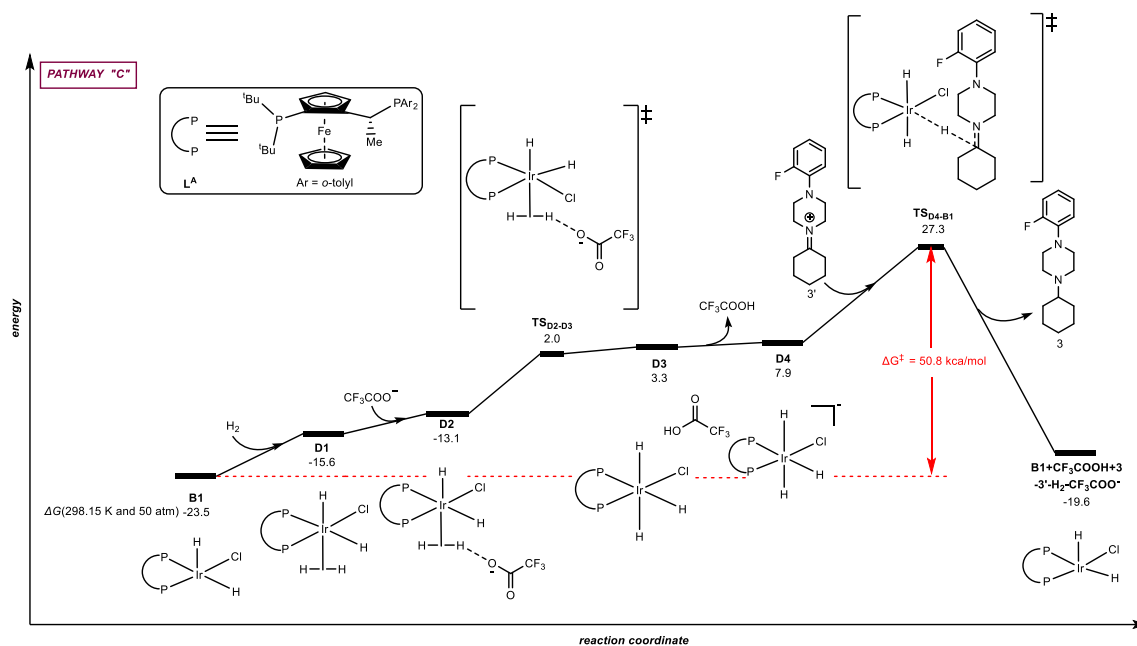

**Fig. S25.** Pathway “C”: reaction coordinate for the trifluoroacetate-mediated, hydride/hydrogen transfer pathway occurring in a hexa-coordinated iridium complex **D1** with initial  $H_2$  activation. The relative Gibbs free energy ( $\Delta G$ ) are reported in kcal/mol at 298.15 K and 50 atm. P-P: diphosphane ligand  $L^A$ .

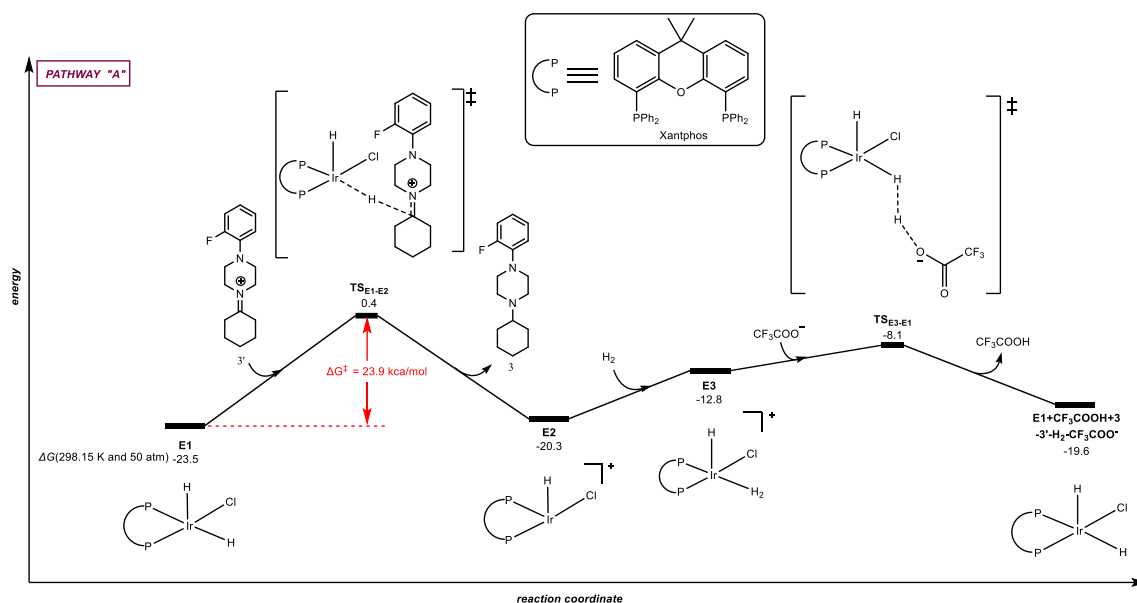

**Fig. S26.** Pathway "A": reaction coordinate for the hydride/hydrogen transfer pathway occurring in a penta-coordinated iridium complex E1. The relative Gibbs free energy ( $\Delta G$ ) are reported in kcal/mol at 298.15 K and 50 atm. P-P: diphosphane ligand Xantphos.

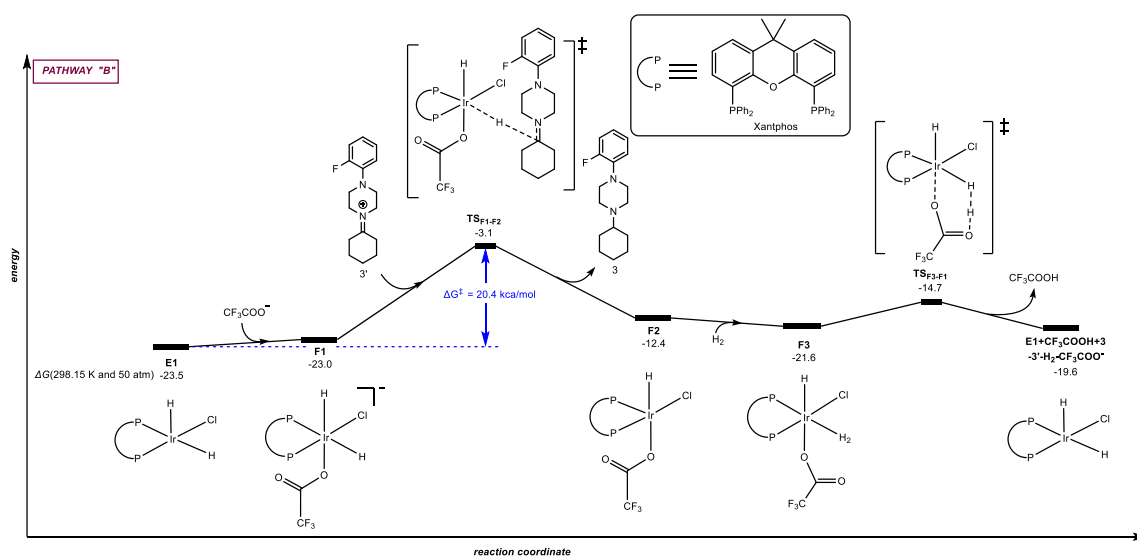

**Fig. S27.** Pathway "B": reaction coordinate for the trifluoroacetate-mediated, hydride/hydrogen transfer pathway occurring in a hexa-coordinated iridium complex F1. The relative Gibbs free energy ( $\Delta G$ ) are reported in kcal/mol at 298.15 K and 50 atm. P-P: diphosphane ligand Xantphos.

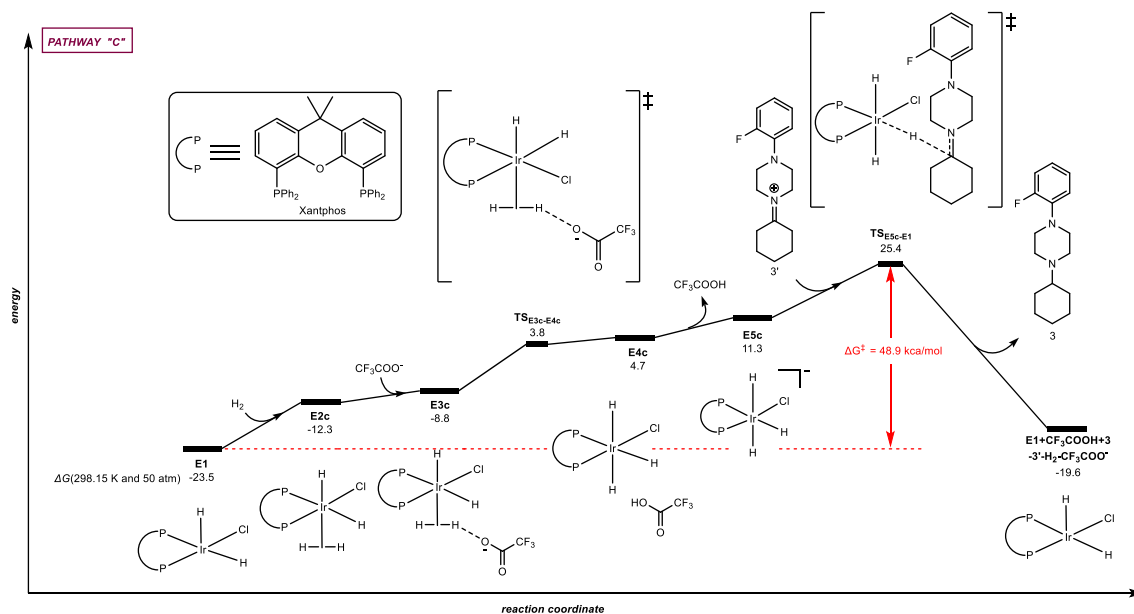

**Fig. S28.** Pathway "C": reaction coordinate for the trifluoroacetate-mediated, hydride/hydrogen transfer pathway occurring in a hexa-coordinated iridium complex **E2c** with initial  $\text{H}_2$  activation. The relative Gibbs free energy ( $\Delta G$ ) are reported in kcal/mol at 298.15 K and 50 atm. P-P: diphosphane ligand Xantphos.

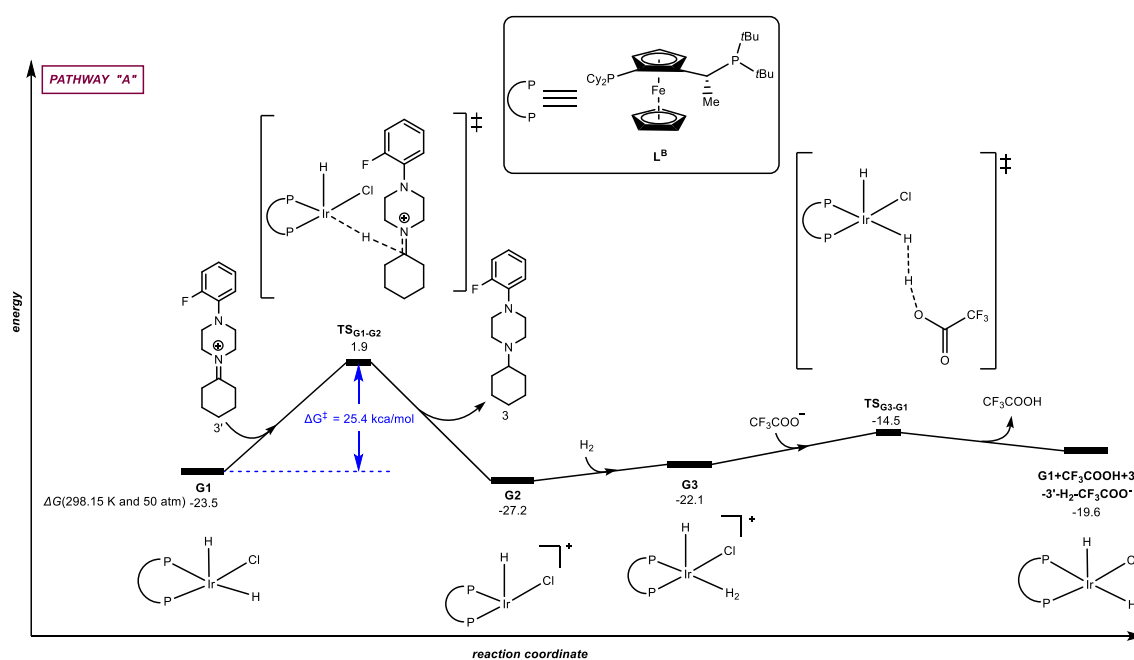

**Fig. S29.** Pathway "A": reaction coordinate for the hydride/hydrogen transfer pathway occurring in a penta-coordinated iridium complex **G1**. The relative Gibbs free energy ( $\Delta G$ ) are reported in kcal/mol at 298.15 K and 50 atm. P-P: diphosphane ligand **L<sup>B</sup>**.

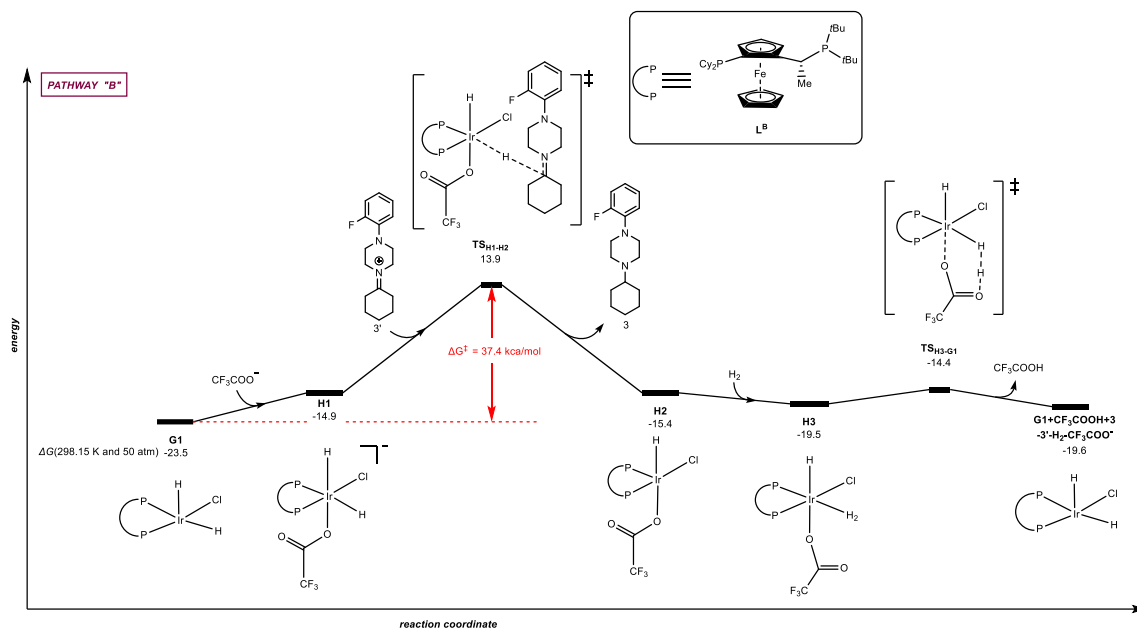

**Fig. S30.** Pathway “B”: reaction coordinate for the trifluoroacetate-mediated, hydride/hydrogen transfer pathway occurring in a hexa-coordinated iridium complex **H1**. The relative Gibbs free energy ( $\Delta G$ ) are reported in kcal/mol at 298.15 K and 50 atm. P-P: diphosphane ligand **L<sup>B</sup>**.

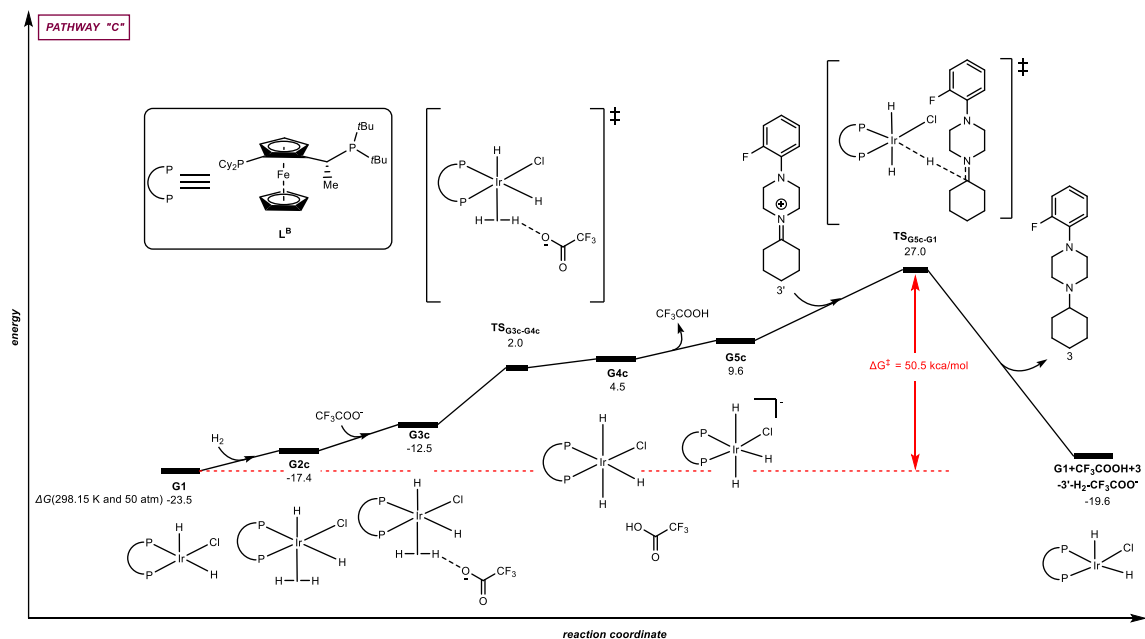

**Fig. S31.** Pathway “C”: reaction coordinate for the trifluoroacetate-mediated, hydride/hydrogen transfer pathway occurring in a hexa-coordinated iridium complex **G2c** with initial  $H_2$  activation. The relative Gibbs free energy ( $\Delta G$ ) are reported in kcal/mol at 298.15 K and 50 atm. P-P: diphosphane ligand **L<sup>B</sup>**.



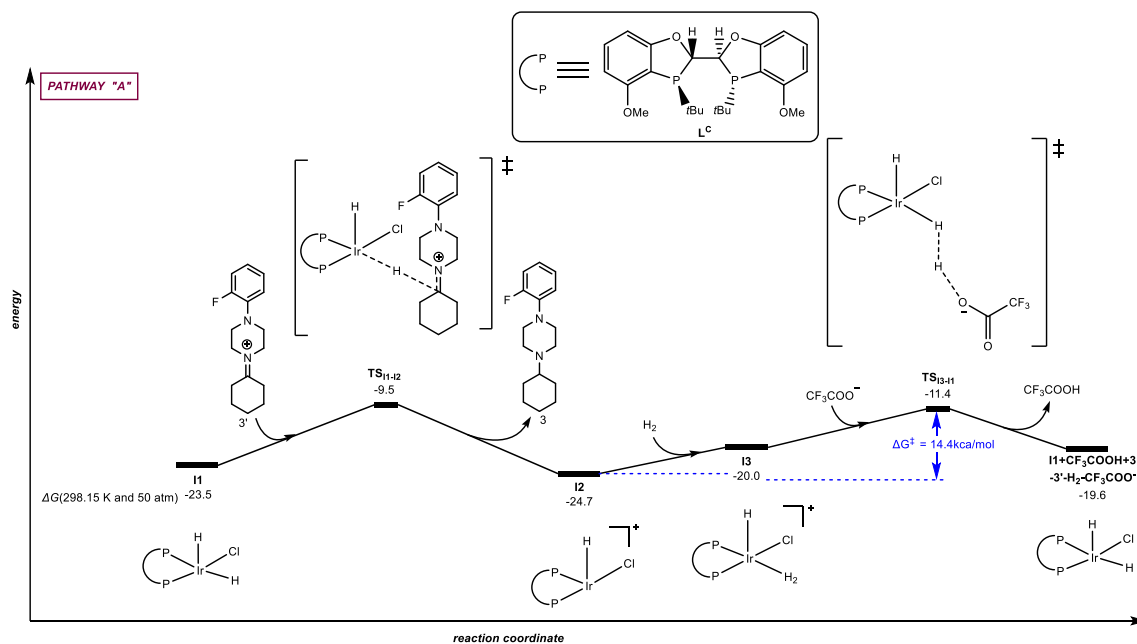

**Fig. S32.** Pathway "A": reaction coordinate for the hydride/hydrogen transfer pathway occurring in a penta-coordinated iridium complex **I1**. The relative Gibbs free energy ( $\Delta G$ ) are reported in kcal/mol at 298.15 K and 50 atm. P-P: diphosphane ligand **L<sup>C</sup>**.

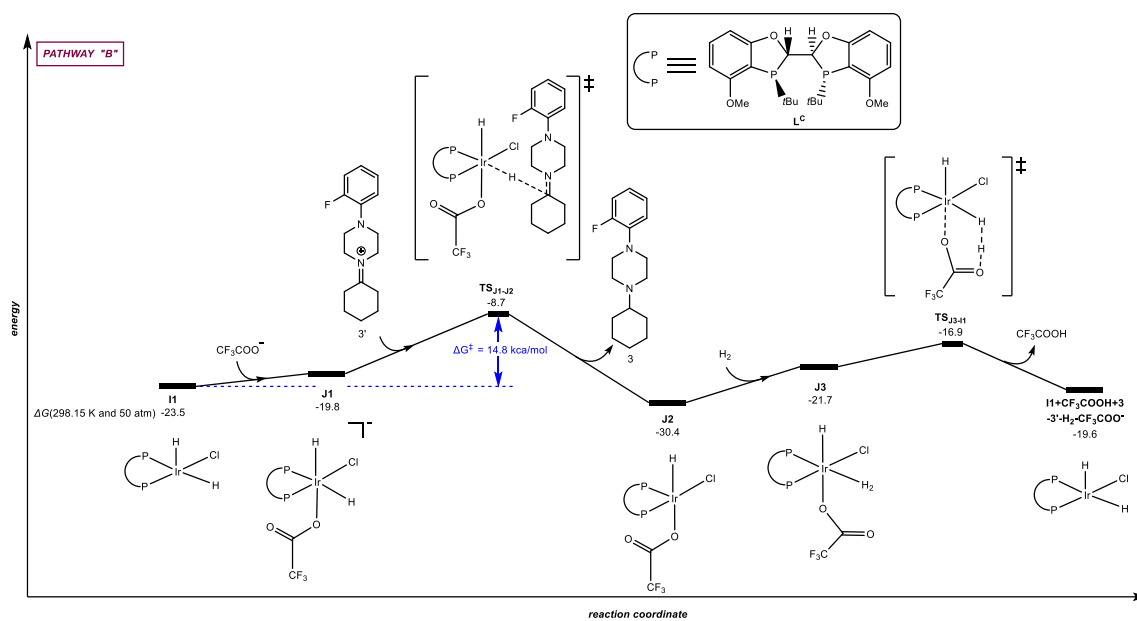

**Fig. S33.** Pathway "B": reaction coordinate for the trifluoroacetate-mediated, hydride/hydrogen transfer pathway occurring in a hexa-coordinated iridium complex **J1**. The relative Gibbs free energy ( $\Delta G$ ) are reported in kcal/mol at 298.15 K and 50 atm. P-P: diphosphane ligand **L<sup>C</sup>**.

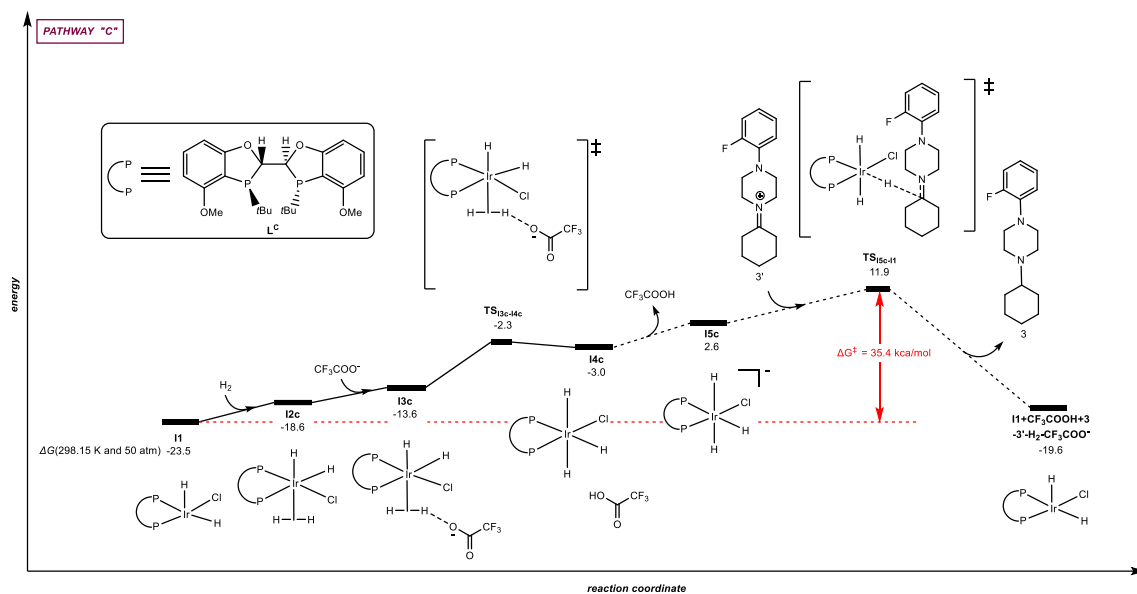

**Fig. S34.** Pathway "C": reaction coordinate for the trifluoroacetate-mediated, hydride/hydrogen transfer pathway occurring in a hexa-coordinated iridium complex **I2c** with initial H<sub>2</sub> activation. The relative Gibbs free energy ( $\Delta G$ ) are reported in kcal/mol at 298.15 K and 50 atm. P-P: diphosphane ligand **L<sup>c</sup>**.

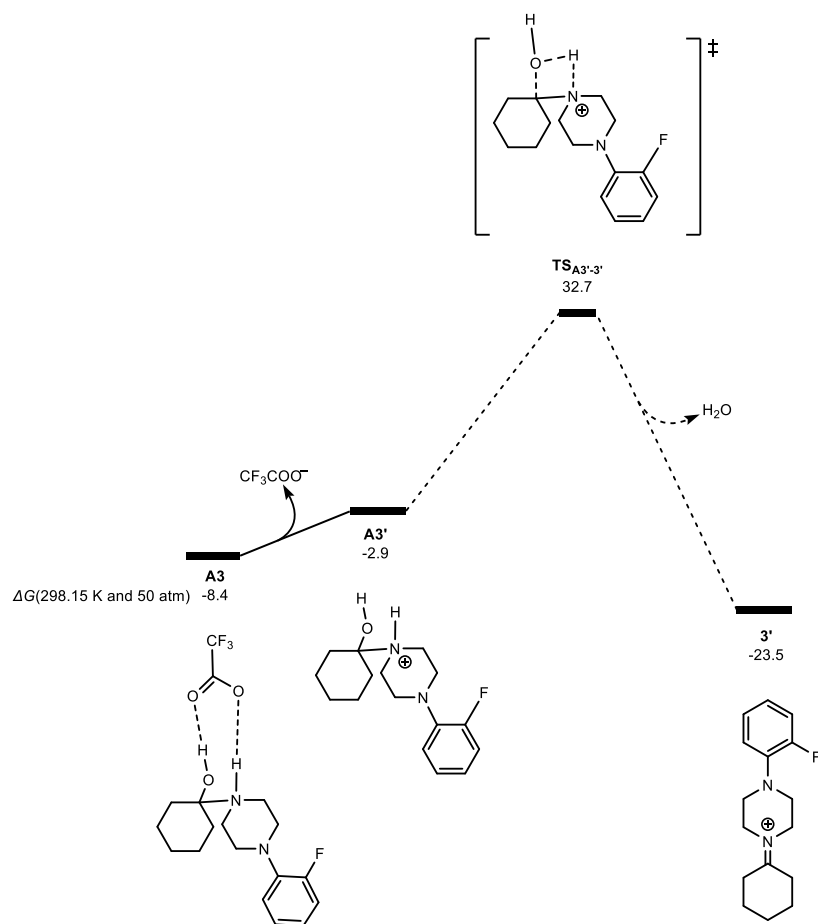

**Fig. S35.** Alternative formation of iminium **3'** without involving TFA in the transition state. Compute at 298.15 K and 50 atm

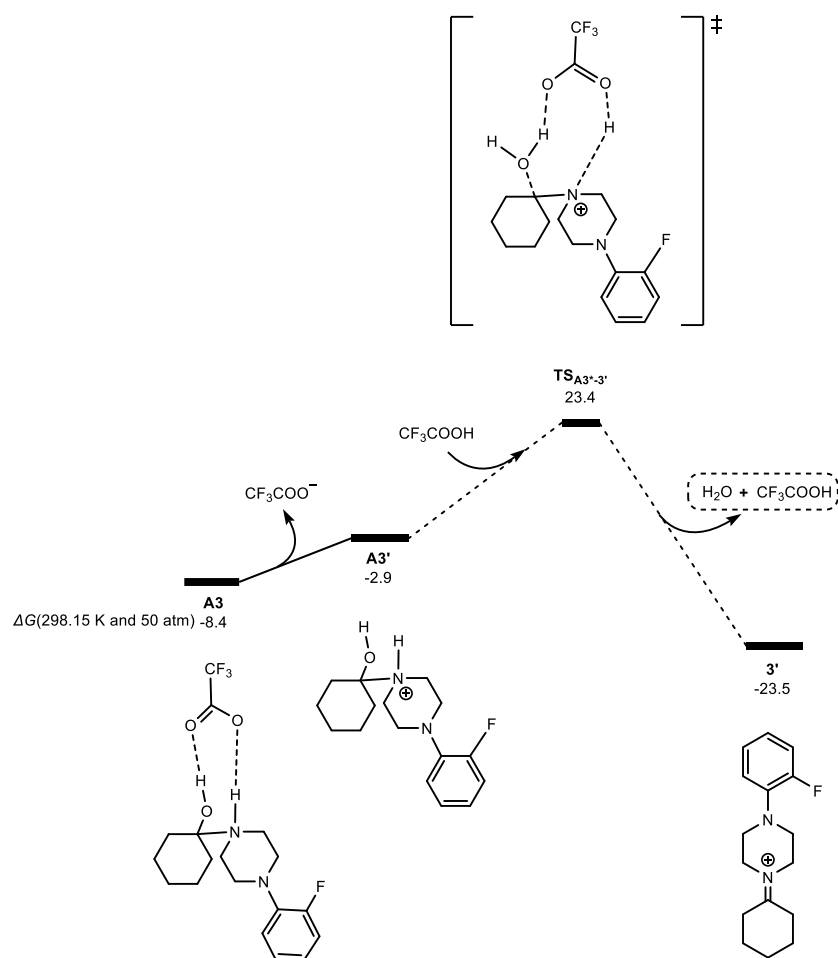

**Fig. S36.** Alternative formation of iminium **3'** involving a cationic, protonated aminoalcohol. Compute at 298.15 K and 50 atm.

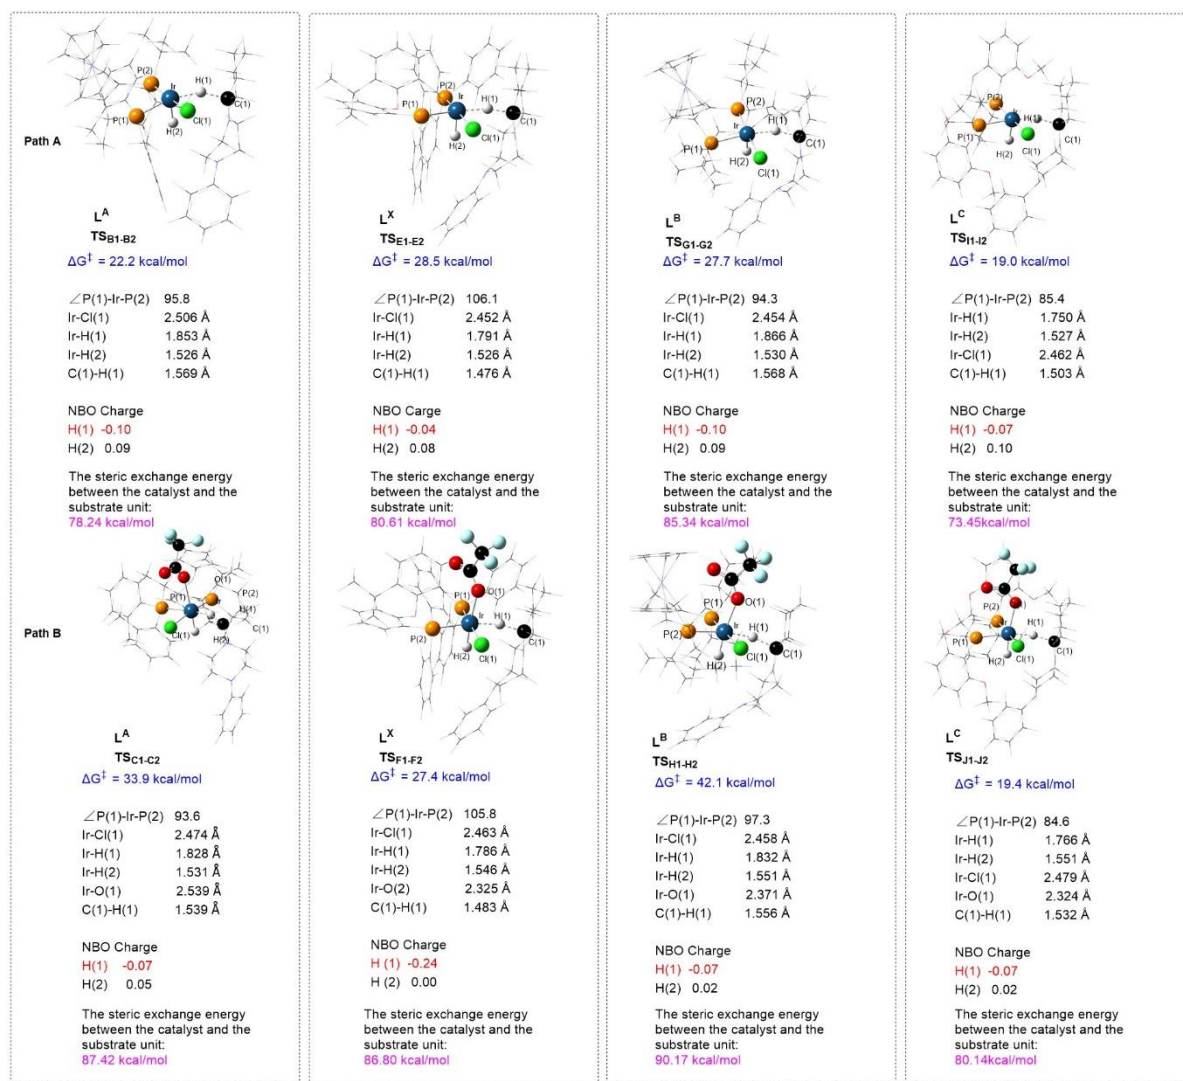

**Fig. S37.** The structures and NBO analysis for rationalizing the computed energy barrier results for the rate-determining hydride transfer transition states. The internuclear separations are given in Å. The substituents of diphosphine ligands and imine substrates are sketched in wireframe only for clarity.

The bite-angle of chelated ligands can strongly influence reactivity with adjusting the electronic and steric effects of ligands (*Chem. Rev.* **1977**, *77*, 313-348; *Coord. Chem. Rev.* **2002**, *233-234*, 41-51). The NBO analysis is performed to rationalize the computed energy barrier results for the rate-determining hydride transfer transition states. In this regard, the NPA charge is utilized to quantify the electronegativities of hydrides, and the steric exchange energy between the catalyst and the substrate unit is utilized to quantify the corresponding steric hindrance. It is found that the electronegativities of hydrides and the steric hindrance can well account for the computed energy barriers.

As for the ligand L<sup>A</sup>, the transition state TS<sub>B1-B2</sub> owns the lower Gibbs energy barrier compared with TS<sub>E1-E2</sub>, which could be due to that TS<sub>E1-E2</sub> has the more negative hydride and the lower steric hindrance between the catalyst and the substrate unit. As for the ligand Xantphos, the transition state TS<sub>F1-F2</sub> has the larger steric hindrance but much more negative hydride compared with TS<sub>E1-E2</sub>, which lead to the little lower Gibbs energy barrier of TS<sub>F1-F2</sub> compared with TS<sub>E1-E2</sub>. As for the ligand L<sup>B</sup>, the transition state TS<sub>G1-G2</sub>, with the more negative hydride and the lower steric hindrance, is more favorable with a Gibbs energy barrier of 27.7 kcal/mol. The ligand L<sup>C</sup> has lowest steric hindrance and the lowest Gibbs energy barrier.

The experimental activity results must take into account both the computed energy barriers and the byproducts. In particular, the ligands L<sup>B</sup> and L<sup>C</sup> give non-negligible amounts of alcohol side-product, in contrast to the high selectivity observed for L<sup>A</sup> and Xantphos. As a result, the ligands L<sup>B</sup> and L<sup>C</sup> have low experimental activities.

**Table S3.** Cartesian coordinates of all stationary points optimized at  $\omega$ B97X-D/6-311G(d,p) level in methanol solvent.**1**

| Coordinates (Angstroms) |              |              |              |
|-------------------------|--------------|--------------|--------------|
|                         | X            | Y            | Z            |
| C                       | -0.991466000 | 1.227224000  | -0.368454000 |
| C                       | -1.847193000 | -0.000107000 | -0.000718000 |
| C                       | -0.991616000 | -1.226818000 | 0.368971000  |
| C                       | 0.357801000  | -1.225680000 | -0.352482000 |
| C                       | 0.357898000  | 1.225391000  | 0.353177000  |
| H                       | -0.803856000 | 1.238343000  | -1.447190000 |
| H                       | -2.502124000 | 0.242370000  | 0.841199000  |
| H                       | -0.804210000 | -1.236376000 | 1.447770000  |
| H                       | 0.952206000  | -2.115553000 | -0.134258000 |
| H                       | 0.204323000  | 1.195404000  | 1.440732000  |
| H                       | -1.530334000 | 2.149362000  | -0.139255000 |
| H                       | -2.499737000 | -0.243104000 | -0.844361000 |
| H                       | -1.530433000 | -2.149288000 | 0.140989000  |
| H                       | 0.204324000  | -1.196242000 | -1.440079000 |
| C                       | 1.164882000  | -0.000084000 | 0.000055000  |
| O                       | 2.381955000  | 0.000024000  | -0.000533000 |
| H                       | 0.952362000  | 2.115337000  | 0.135429000  |

**2**

| Coordinates (Angstroms) |             |              |              |
|-------------------------|-------------|--------------|--------------|
|                         | X           | Y            | Z            |
| C                       | 1.458612000 | -1.437369000 | -0.135730000 |
| C                       | 0.722018000 | -0.248834000 | -0.044319000 |
| C                       | 1.475406000 | 0.924828000  | 0.125244000  |
| C                       | 2.851326000 | 0.944894000  | 0.155635000  |
| C                       | 3.555388000 | -0.252525000 | 0.050911000  |
| C                       | 2.849998000 | -1.438740000 | -0.082320000 |

|   |              |              |              |
|---|--------------|--------------|--------------|
| H | 0.936084000  | -2.377895000 | -0.254469000 |
| H | 3.356634000  | 1.894784000  | 0.288496000  |
| H | 4.638486000  | -0.248584000 | 0.084449000  |
| H | 3.378961000  | -2.382410000 | -0.157828000 |
| C | -1.392406000 | -1.466779000 | 0.108728000  |
| C | -1.372882000 | 0.700325000  | -0.942363000 |
| C | -2.907995000 | -1.176703000 | 0.170030000  |
| H | -1.191641000 | -2.163044000 | -0.721676000 |
| C | -2.659714000 | 1.174462000  | -0.247293000 |
| H | -0.746465000 | 1.549834000  | -1.201046000 |
| H | -3.390325000 | -1.921628000 | 0.806100000  |
| H | -3.401749000 | 1.434806000  | -1.010533000 |
| F | 0.820064000  | 2.100269000  | 0.294333000  |
| N | -0.669445000 | -0.209367000 | -0.039766000 |
| N | -3.216451000 | 0.162438000  | 0.660132000  |
| H | -2.765807000 | 0.271338000  | 1.562324000  |
| H | -1.606965000 | 0.175099000  | -1.880882000 |
| H | -1.059922000 | -1.946396000 | 1.034148000  |
| H | -3.348880000 | -1.277765000 | -0.826314000 |
| H | -2.456219000 | 2.076592000  | 0.334539000  |

---

3

| Coordinates (Angstroms) |              |              |              |
|-------------------------|--------------|--------------|--------------|
|                         | X            | Y            | Z            |
| C                       | 0.817361000  | 1.136625000  | 0.641291000  |
| C                       | -0.635970000 | 0.885860000  | 1.013059000  |
| C                       | -0.809591000 | -0.819024000 | -0.639763000 |
| C                       | 0.648409000  | -0.611788000 | -1.016480000 |
| C                       | 2.796321000  | -0.243368000 | 0.063635000  |
| C                       | 3.714309000  | 0.806070000  | -0.032037000 |
| C                       | 5.084582000  | 0.610184000  | -0.049148000 |
| C                       | 5.593415000  | -0.679413000 | -0.014552000 |

|   |              |              |              |
|---|--------------|--------------|--------------|
| C | 4.712484000  | -1.755175000 | 0.050285000  |
| C | 3.345604000  | -1.533760000 | 0.100901000  |
| H | 1.369477000  | 1.453468000  | 1.528125000  |
| H | -1.074619000 | 1.821159000  | 1.372043000  |
| H | -0.860413000 | -1.621010000 | 0.116702000  |
| H | 0.711229000  | 0.093029000  | -1.862250000 |
| H | 5.732536000  | 1.477069000  | -0.112843000 |
| H | 6.664884000  | -0.839841000 | -0.038833000 |
| H | 5.091891000  | -2.770320000 | 0.082987000  |
| H | 2.661929000  | -2.371671000 | 0.185950000  |
| N | 1.397750000  | -0.100890000 | 0.131717000  |
| N | -1.383275000 | 0.428968000  | -0.151470000 |
| H | 1.077273000  | -1.562484000 | -1.336297000 |
| H | -1.354294000 | -1.156406000 | -1.524035000 |
| H | -0.668813000 | 0.157177000  | 1.841706000  |
| H | 0.854774000  | 1.946155000  | -0.100698000 |
| C | -2.834415000 | 0.405482000  | 0.070364000  |
| C | -3.607514000 | 0.365430000  | -1.250231000 |
| C | -3.344678000 | -0.696234000 | 1.013762000  |
| C | -5.112665000 | 0.510068000  | -1.013293000 |
| H | -3.242759000 | 1.162420000  | -1.905741000 |
| C | -4.847706000 | -0.547767000 | 1.261988000  |
| H | -3.151659000 | -1.678364000 | 0.564902000  |
| C | -5.633095000 | -0.558270000 | -0.050144000 |
| H | -5.316776000 | 1.503417000  | -0.593060000 |
| H | -5.033296000 | 0.399710000  | 1.784765000  |
| H | -6.699684000 | -0.405715000 | 0.143761000  |
| H | -2.802595000 | -0.663622000 | 1.964137000  |
| H | -3.421083000 | -0.586407000 | -1.762475000 |
| H | -5.646755000 | 0.454006000  | -1.967073000 |
| H | -5.532361000 | -1.545138000 | -0.520675000 |
| H | -5.199838000 | -1.346523000 | 1.922628000  |



|   |              |             |              |
|---|--------------|-------------|--------------|
| H | -3.065990000 | 1.369030000 | 0.543608000  |
| F | 3.276057000  | 2.084978000 | -0.120766000 |

---

3'

---

| Coordinates (Angstroms) |              |              |              |
|-------------------------|--------------|--------------|--------------|
|                         | X            | Y            | Z            |
| C                       | 0.325659000  | 0.674279000  | 1.214586000  |
| C                       | -0.846933000 | -0.055094000 | 1.853997000  |
| C                       | -0.710486000 | -1.756602000 | 0.150931000  |
| C                       | 0.468445000  | -1.029932000 | -0.473604000 |
| C                       | 2.453375000  | 0.218406000  | 0.124584000  |
| C                       | 2.763413000  | 1.577295000  | 0.030943000  |
| C                       | 4.029822000  | 2.002891000  | -0.360417000 |
| C                       | 5.013792000  | 1.080802000  | -0.685288000 |
| C                       | 4.731707000  | -0.279574000 | -0.601052000 |
| C                       | 3.478848000  | -0.680113000 | -0.191210000 |
| H                       | 0.874985000  | 1.180581000  | 2.009898000  |
| H                       | -1.479693000 | 0.653718000  | 2.372842000  |
| H                       | -0.367434000 | -2.443893000 | 0.926346000  |
| H                       | 0.104419000  | -0.361606000 | -1.269534000 |
| H                       | 2.007664000  | 2.316387000  | 0.265315000  |
| H                       | 4.236790000  | 3.065381000  | -0.420085000 |
| H                       | 5.998341000  | 1.408540000  | -0.997759000 |
| H                       | 5.476496000  | -1.032777000 | -0.830120000 |
| N                       | 1.200555000  | -0.275871000 | 0.545026000  |
| N                       | -1.597567000 | -0.778122000 | 0.809366000  |
| H                       | 1.117784000  | -1.776943000 | -0.926014000 |
| H                       | -1.241755000 | -2.320200000 | -0.605458000 |
| H                       | -0.493248000 | -0.801404000 | 2.567158000  |
| H                       | -0.068479000 | 1.437725000  | 0.525243000  |
| C                       | -2.812377000 | -0.515907000 | 0.449118000  |
| C                       | -3.485312000 | -1.162317000 | -0.718763000 |

|   |              |              |              |
|---|--------------|--------------|--------------|
| C | -3.652667000 | 0.547690000  | 1.079585000  |
| C | -3.731539000 | -0.077376000 | -1.790876000 |
| H | -2.937265000 | -1.996675000 | -1.143478000 |
| C | -3.905627000 | 1.653472000  | 0.031813000  |
| H | -4.607279000 | 0.079103000  | 1.338315000  |
| C | -4.546430000 | 1.085181000  | -1.230973000 |
| H | -2.764641000 | 0.283961000  | -2.157753000 |
| H | -2.952087000 | 2.134080000  | -0.212195000 |
| H | -4.641268000 | 1.870098000  | -1.986139000 |
| H | -3.233861000 | 0.970858000  | 1.986489000  |
| H | -4.449535000 | -1.538710000 | -0.364598000 |
| H | -4.244719000 | -0.544459000 | -2.634114000 |
| H | -5.558728000 | 0.736113000  | -0.996424000 |
| H | -4.546027000 | 2.412468000  | 0.486128000  |
| F | 3.234054000  | -2.005889000 | -0.079451000 |

3”

| Coordinates (Angstroms) |              |              |              |
|-------------------------|--------------|--------------|--------------|
|                         | X            | Y            | Z            |
| C                       | -0.669959000 | 1.412219000  | -0.004700000 |
| C                       | 0.765980000  | 1.268094000  | -0.480597000 |
| C                       | 0.720071000  | -1.056892000 | 0.118946000  |
| C                       | -0.714737000 | -0.903986000 | 0.584121000  |
| C                       | -2.784622000 | 0.209207000  | -0.003645000 |
| C                       | -3.464301000 | 1.296499000  | 0.554482000  |
| C                       | -4.852387000 | 1.306502000  | 0.662746000  |
| C                       | -5.601697000 | 0.221716000  | 0.232075000  |
| C                       | -4.952886000 | -0.874634000 | -0.329371000 |
| C                       | -3.580466000 | -0.855551000 | -0.446891000 |
| H                       | -1.155239000 | 2.188782000  | -0.599682000 |
| H                       | 1.275011000  | 2.215339000  | -0.292305000 |
| H                       | 0.725817000  | -1.411846000 | -0.925351000 |

|   |              |              |              |
|---|--------------|--------------|--------------|
| H | -0.728167000 | -0.668573000 | 1.660961000  |
| H | -2.902666000 | 2.150081000  | 0.912203000  |
| H | -5.342744000 | 2.169600000  | 1.098871000  |
| H | -6.681577000 | 0.222017000  | 0.322782000  |
| H | -5.499007000 | -1.736162000 | -0.696079000 |
| N | -1.388615000 | 0.156797000  | -0.170619000 |
| N | 1.451860000  | 0.205284000  | 0.236235000  |
| H | -1.230409000 | -1.851619000 | 0.438186000  |
| H | 1.193597000  | -1.820538000 | 0.734811000  |
| H | 0.775398000  | 1.089749000  | -1.569343000 |
| H | -0.665704000 | 1.739460000  | 1.048192000  |
| C | 2.848073000  | 0.111581000  | 0.051252000  |
| C | 3.529144000  | -0.978751000 | 0.852890000  |
| C | 3.557459000  | 0.949181000  | -0.723000000 |
| C | 5.020476000  | -0.714121000 | 1.047966000  |
| H | 3.033241000  | -1.067467000 | 1.824656000  |
| C | 5.060146000  | 0.923139000  | -0.842472000 |
| C | 5.677593000  | -0.355169000 | -0.280388000 |
| H | 5.155756000  | 0.113310000  | 1.755467000  |
| H | 5.482986000  | 1.794542000  | -0.322320000 |
| H | 6.757808000  | -0.231495000 | -0.159193000 |
| H | 3.054910000  | 1.725013000  | -1.289937000 |
| H | 3.398798000  | -1.943925000 | 0.348352000  |
| H | 5.492469000  | -1.595702000 | 1.491477000  |
| H | 5.524027000  | -1.178701000 | -0.988770000 |
| H | 5.339540000  | 1.044732000  | -1.894980000 |
| F | -2.977097000 | -1.915042000 | -1.035311000 |

---

**A2**

---

| Coordinates (Angstroms) |             |             |             |
|-------------------------|-------------|-------------|-------------|
|                         | X           | Y           | Z           |
| C                       | 0.420194000 | 3.241451000 | 1.208830000 |

---

|   |              |              |              |
|---|--------------|--------------|--------------|
| C | -1.091622000 | 3.005289000  | 1.386093000  |
| C | -1.645462000 | 1.964038000  | 0.396696000  |
| C | -0.865482000 | 1.937592000  | -0.916321000 |
| C | 1.140824000  | 2.009791000  | 0.652628000  |
| H | 0.587409000  | 4.074645000  | 0.518697000  |
| H | -1.297789000 | 2.666255000  | 2.405406000  |
| H | -1.577888000 | 0.965536000  | 0.834438000  |
| H | -1.270651000 | 1.218971000  | -1.630705000 |
| H | 0.877348000  | 3.528252000  | 2.158098000  |
| H | -1.613903000 | 3.958173000  | 1.260971000  |
| H | -2.702388000 | 2.149103000  | 0.192889000  |
| H | -0.891420000 | 2.924609000  | -1.400120000 |
| C | 0.582493000  | 1.628316000  | -0.688430000 |
| O | 1.270049000  | 1.129553000  | -1.577084000 |
| C | -3.475447000 | -0.403300000 | -1.532364000 |
| C | -3.441862000 | -0.990174000 | -0.258022000 |
| C | -4.414529000 | -0.524871000 | 0.643098000  |
| C | -5.307938000 | 0.481272000  | 0.349318000  |
| C | -5.297688000 | 1.059783000  | -0.916575000 |
| C | -4.386130000 | 0.596265000  | -1.854769000 |
| H | -2.762182000 | -0.718278000 | -2.282509000 |
| H | -6.020361000 | 0.782703000  | 1.108835000  |
| H | -6.000231000 | 1.847503000  | -1.160910000 |
| H | -4.363072000 | 1.025892000  | -2.850302000 |
| C | -1.891313000 | -1.933254000 | 1.414033000  |
| C | -1.728804000 | -2.619288000 | -0.916950000 |
| C | -0.368331000 | -1.982714000 | 1.243482000  |
| H | -2.152872000 | -0.990466000 | 1.893288000  |
| C | -0.420870000 | -1.848605000 | -1.165254000 |
| H | -1.493747000 | -3.627799000 | -0.565707000 |
| H | -0.019941000 | -3.026109000 | 1.173567000  |
| H | -0.550681000 | -1.085955000 | -1.939888000 |

|   |              |              |              |
|---|--------------|--------------|--------------|
| F | -4.506194000 | -1.112250000 | 1.864200000  |
| N | -2.564527000 | -2.004089000 | 0.103385000  |
| N | -0.008119000 | -1.190740000 | 0.077083000  |
| H | 0.991639000  | -1.025870000 | 0.063594000  |
| H | -2.293050000 | -2.742441000 | -1.841561000 |
| H | -2.222911000 | -2.747019000 | 2.068627000  |
| H | 0.097714000  | -1.549936000 | 2.131770000  |
| H | 0.329492000  | -2.565163000 | -1.532468000 |
| C | 5.430286000  | -0.445546000 | 0.099202000  |
| F | 5.630920000  | -1.427106000 | 0.972312000  |
| F | 5.949841000  | 0.679296000  | 0.607910000  |
| F | 6.099972000  | -0.735886000 | -1.020299000 |
| C | 3.924034000  | -0.256295000 | -0.182928000 |
| O | 3.741057000  | 0.616813000  | -1.124634000 |
| H | 2.751865000  | 0.798078000  | -1.287540000 |
| O | 3.096614000  | -0.866222000 | 0.445805000  |
| H | 0.980550000  | 1.144358000  | 1.308274000  |
| H | 2.218868000  | 2.162636000  | 0.569581000  |

---

### A3

| Coordinates (Angstroms) |              |             |              |
|-------------------------|--------------|-------------|--------------|
|                         | X            | Y           | Z            |
| C                       | 1.126526000  | 3.711887000 | -0.202994000 |
| C                       | -0.290942000 | 4.225167000 | 0.116847000  |
| C                       | -1.303458000 | 3.073181000 | 0.235741000  |
| C                       | -0.960516000 | 1.937768000 | -0.727231000 |
| C                       | 1.335555000  | 2.292751000 | 0.321720000  |
| H                       | 1.290319000  | 3.706334000 | -1.285130000 |
| H                       | -0.281993000 | 4.791337000 | 1.052944000  |
| H                       | -1.315658000 | 2.698034000 | 1.263450000  |
| H                       | -1.733946000 | 1.166876000 | -0.732893000 |
| H                       | 1.880210000  | 4.377817000 | 0.222907000  |

|   |              |              |              |
|---|--------------|--------------|--------------|
| H | -0.609092000 | 4.918105000  | -0.667749000 |
| H | -2.314737000 | 3.430979000  | 0.028385000  |
| H | -0.919463000 | 2.334234000  | -1.744965000 |
| C | 0.425240000  | 1.331346000  | -0.456665000 |
| O | 0.991378000  | 1.008939000  | -1.688706000 |
| C | -3.469208000 | -1.581632000 | -1.295275000 |
| C | -3.365778000 | -1.236862000 | 0.060110000  |
| C | -4.541432000 | -0.757307000 | 0.656298000  |
| C | -5.725966000 | -0.583616000 | -0.025504000 |
| C | -5.794007000 | -0.925430000 | -1.371919000 |
| C | -4.662836000 | -1.434715000 | -1.993521000 |
| H | -2.606903000 | -1.967474000 | -1.822904000 |
| H | -6.587261000 | -0.204377000 | 0.512419000  |
| H | -6.722032000 | -0.800424000 | -1.916808000 |
| H | -4.695342000 | -1.711337000 | -3.041435000 |
| C | -1.824576000 | -0.230874000 | 1.668397000  |
| C | -1.062317000 | -2.071022000 | 0.251283000  |
| C | -0.322289000 | 0.007218000  | 1.671064000  |
| H | -2.344392000 | 0.665796000  | 1.327951000  |
| C | -0.172306000 | -1.133412000 | -0.545722000 |
| H | -0.496933000 | -2.548974000 | 1.054616000  |
| H | 0.186709000  | -0.764798000 | 2.247312000  |
| H | -0.722278000 | -0.702027000 | -1.378769000 |
| F | -4.525871000 | -0.470452000 | 1.981367000  |
| N | -2.204316000 | -1.377773000 | 0.825647000  |
| N | 0.329632000  | -0.003250000 | 0.321145000  |
| H | 1.331432000  | -0.246282000 | 0.517068000  |
| H | -1.401230000 | -2.876150000 | -0.398756000 |
| H | -2.109044000 | -0.391258000 | 2.711713000  |
| H | -0.116219000 | 0.956681000  | 2.157887000  |
| H | 0.698823000  | -1.653691000 | -0.942121000 |
| C | 5.106352000  | -1.172334000 | 0.034055000  |

|   |             |              |              |
|---|-------------|--------------|--------------|
| F | 5.067997000 | -2.499847000 | 0.241370000  |
| F | 5.668100000 | -0.618572000 | 1.123152000  |
| F | 5.928638000 | -0.952006000 | -0.995474000 |
| C | 3.678922000 | -0.606829000 | -0.193811000 |
| O | 3.481539000 | -0.017818000 | -1.266011000 |
| H | 1.909713000 | 0.681972000  | -1.554941000 |
| O | 2.901323000 | -0.820828000 | 0.756027000  |
| H | 1.126022000 | 2.269391000  | 1.393291000  |
| H | 2.370593000 | 1.970241000  | 0.187534000  |

---

#### A4

| Coordinates (Angstroms) |              |              |              |
|-------------------------|--------------|--------------|--------------|
|                         | X            | Y            | Z            |
| C                       | 0.949930000  | 1.153192000  | 0.414813000  |
| C                       | -0.496683000 | 0.930093000  | 0.821196000  |
| C                       | -0.622979000 | -1.036814000 | -0.515039000 |
| C                       | 0.842193000  | -0.870148000 | -0.889601000 |
| C                       | 2.969370000  | -0.258794000 | 0.113604000  |
| C                       | 3.865006000  | 0.782107000  | -0.146884000 |
| C                       | 5.239387000  | 0.618024000  | -0.123757000 |
| C                       | 5.776637000  | -0.636072000 | 0.124195000  |
| C                       | 4.918915000  | -1.706714000 | 0.360276000  |
| C                       | 3.547160000  | -1.512414000 | 0.365601000  |
| H                       | 1.481372000  | 1.643776000  | 1.232211000  |
| H                       | -0.962427000 | 1.894576000  | 1.024307000  |
| H                       | -0.694914000 | -1.704985000 | 0.360686000  |
| H                       | 0.908202000  | -0.336482000 | -1.852419000 |
| H                       | 5.867682000  | 1.477737000  | -0.327484000 |
| H                       | 6.851505000  | -0.773608000 | 0.132581000  |
| H                       | 5.320440000  | -2.693908000 | 0.559405000  |
| H                       | 2.882785000  | -2.341255000 | 0.585141000  |
| N                       | 1.567807000  | -0.140322000 | 0.148167000  |

|   |              |              |              |
|---|--------------|--------------|--------------|
| N | -1.226523000 | 0.265728000  | -0.257497000 |
| H | 1.287989000  | -1.856792000 | -1.021427000 |
| H | -1.116382000 | -1.525297000 | -1.354125000 |
| H | -0.509583000 | 0.338206000  | 1.751140000  |
| H | 0.973799000  | 1.814246000  | -0.462795000 |
| C | -2.688396000 | 0.308597000  | -0.093862000 |
| C | -3.390236000 | -0.428256000 | -1.244707000 |
| C | -3.195192000 | -0.230717000 | 1.251315000  |
| C | -4.911069000 | -0.309929000 | -1.142983000 |
| H | -3.023075000 | -0.024617000 | -2.194901000 |
| C | -4.721372000 | -0.179448000 | 1.367662000  |
| H | -2.850121000 | -1.266437000 | 1.349551000  |
| C | -5.409518000 | -0.868934000 | 0.189769000  |
| H | -5.206686000 | 0.740384000  | -1.236372000 |
| H | -5.041629000 | 0.867230000  | 1.412343000  |
| H | -6.495182000 | -0.754429000 | 0.269255000  |
| H | -2.744461000 | 0.339971000  | 2.067121000  |
| H | -3.132069000 | -1.490428000 | -1.216375000 |
| H | -5.372269000 | -0.846652000 | -1.977617000 |
| H | -5.198132000 | -1.945734000 | 0.227434000  |
| H | -5.028702000 | -0.643718000 | 2.310068000  |
| O | -3.061369000 | 1.684299000  | -0.125432000 |
| H | -2.736305000 | 2.043060000  | -0.957673000 |
| F | 3.400135000  | 2.018919000  | -0.446764000 |

---

**TS<sub>A2-A3</sub>**

---

| Coordinates (Angstroms) |              |             |              |
|-------------------------|--------------|-------------|--------------|
|                         | X            | Y           | Z            |
| C                       | 0.451547000  | 3.207003000 | 0.936880000  |
| C                       | -1.088402000 | 3.279778000 | 0.999467000  |
| C                       | -1.759742000 | 2.074167000 | 0.319505000  |
| C                       | -0.978696000 | 1.615070000 | -0.902521000 |



|   |              |              |              |
|---|--------------|--------------|--------------|
| C | 0.957901000  | 1.762759000  | 0.747821000  |
| H | 0.826707000  | 3.816243000  | 0.109256000  |
| H | -1.419039000 | 3.326281000  | 2.040446000  |
| H | -1.818281000 | 1.242925000  | 1.024880000  |
| H | -1.438690000 | 0.762596000  | -1.403498000 |
| H | 0.896721000  | 3.609809000  | 1.848308000  |
| H | -1.420186000 | 4.205626000  | 0.521446000  |
| H | -2.786128000 | 2.312069000  | 0.032249000  |
| H | -0.920627000 | 2.416423000  | -1.651909000 |
| C | 0.435990000  | 1.290807000  | -0.569146000 |
| O | 1.190387000  | 0.967990000  | -1.531807000 |
| C | -3.538342000 | -0.673745000 | -1.530254000 |
| C | -3.399164000 | -1.019305000 | -0.176401000 |
| C | -4.366560000 | -0.474124000 | 0.684776000  |
| C | -5.350303000 | 0.397083000  | 0.271959000  |
| C | -5.442487000 | 0.741846000  | -1.072935000 |
| C | -4.538977000 | 0.185950000  | -1.967982000 |
| H | -2.836251000 | -1.065843000 | -2.254684000 |
| H | -6.050918000 | 0.775667000  | 1.007656000  |
| H | -6.215281000 | 1.422773000  | -1.408868000 |
| H | -4.597724000 | 0.428309000  | -3.023410000 |
| C | -1.732864000 | -1.565095000 | 1.564900000  |
| C | -1.578570000 | -2.613828000 | -0.629054000 |
| C | -0.214210000 | -1.625835000 | 1.390731000  |
| H | -2.011526000 | -0.561701000 | 1.882611000  |
| C | -0.323715000 | -1.833247000 | -1.035237000 |
| H | -1.284874000 | -3.542261000 | -0.131103000 |
| H | 0.142131000  | -2.660587000 | 1.495073000  |
| H | -0.542875000 | -1.146010000 | -1.860013000 |
| F | -4.357847000 | -0.838989000 | 1.992849000  |
| N | -2.419604000 | -1.877392000 | 0.301195000  |
| N | 0.182078000  | -1.053361000 | 0.106283000  |

|   |              |              |              |
|---|--------------|--------------|--------------|
| H | 1.199650000  | -1.044788000 | 0.071329000  |
| H | -2.152304000 | -2.908558000 | -1.507525000 |
| H | -2.032978000 | -2.257982000 | 2.358474000  |
| H | 0.254535000  | -1.050984000 | 2.193328000  |
| H | 0.427331000  | -2.545346000 | -1.398685000 |
| C | 5.416042000  | -0.345701000 | 0.034171000  |
| F | 5.874533000  | -1.597095000 | -0.111344000 |
| F | 5.629654000  | 0.011053000  | 1.313528000  |
| F | 6.164434000  | 0.450197000  | -0.733866000 |
| C | 3.902229000  | -0.266202000 | -0.289581000 |
| O | 3.574770000  | 0.681393000  | -1.050200000 |
| H | 2.226642000  | 0.826367000  | -1.278442000 |
| O | 3.198974000  | -1.115977000 | 0.250676000  |
| H | 0.551050000  | 1.130804000  | 1.539543000  |
| H | 2.045505000  | 1.705431000  | 0.778755000  |

**TS<sub>A4-3'</sub>**

| Coordinates (Angstroms) |             |              |              |
|-------------------------|-------------|--------------|--------------|
|                         | X           | Y            | Z            |
| C                       | 2.238814000 | -0.810927000 | 1.306178000  |
| C                       | 1.472471000 | -2.122941000 | 1.399268000  |
| C                       | 1.644165000 | -2.458774000 | -0.962412000 |
| C                       | 2.415384000 | -1.150392000 | -1.108188000 |
| C                       | 3.969937000 | 0.306382000  | 0.040458000  |
| C                       | 3.492224000 | 1.599735000  | -0.178781000 |
| C                       | 4.320564000 | 2.701601000  | -0.268086000 |
| C                       | 5.692404000 | 2.520696000  | -0.135081000 |
| C                       | 6.207375000 | 1.248357000  | 0.082571000  |
| C                       | 5.349167000 | 0.157555000  | 0.168090000  |
| H                       | 2.853463000 | -0.693185000 | 2.202350000  |
| H                       | 0.820574000 | -2.110871000 | 2.268011000  |
| H                       | 2.354136000 | -3.276464000 | -0.798614000 |

|   |              |              |              |
|---|--------------|--------------|--------------|
| H | 1.722141000  | -0.352187000 | -1.403100000 |
| H | 3.885926000  | 3.679870000  | -0.437488000 |
| H | 6.354068000  | 3.376790000  | -0.201398000 |
| H | 7.276229000  | 1.102774000  | 0.188158000  |
| H | 5.737535000  | -0.840563000 | 0.337629000  |
| N | 3.122863000  | -0.837380000 | 0.138433000  |
| N | 0.727336000  | -2.429177000 | 0.177629000  |
| H | 3.158030000  | -1.263586000 | -1.902297000 |
| H | 1.112808000  | -2.666998000 | -1.887389000 |
| H | 2.191094000  | -2.936599000 | 1.545425000  |
| H | 1.530896000  | 0.032353000  | 1.282815000  |
| C | -0.613654000 | -2.099772000 | 0.007209000  |
| C | -1.298467000 | -2.888541000 | -1.109314000 |
| C | -1.409575000 | -2.072701000 | 1.311085000  |
| C | -2.808953000 | -2.681127000 | -1.218254000 |
| H | -0.829801000 | -2.663732000 | -2.067222000 |
| C | -2.920873000 | -1.908191000 | 1.149823000  |
| H | -1.209143000 | -3.026860000 | 1.810112000  |
| C | -3.499466000 | -2.877637000 | 0.126310000  |
| H | -3.027403000 | -1.677395000 | -1.596487000 |
| H | -3.157860000 | -0.886127000 | 0.846323000  |
| H | -4.577339000 | -2.720984000 | 0.025992000  |
| H | -1.027647000 | -1.278677000 | 1.955274000  |
| H | -1.098159000 | -3.941619000 | -0.886714000 |
| H | -3.194344000 | -3.386744000 | -1.959488000 |
| H | -3.351560000 | -3.909994000 | 0.468250000  |
| H | -3.380780000 | -2.057820000 | 2.130526000  |
| O | -0.677772000 | -0.569119000 | -0.579264000 |
| H | -0.166942000 | 0.001646000  | 0.010717000  |
| F | 2.159667000  | 1.794691000  | -0.309260000 |
| C | -2.751126000 | 1.615993000  | 0.042980000  |
| C | -4.056288000 | 2.448439000  | 0.003815000  |

|   |              |              |              |
|---|--------------|--------------|--------------|
| O | -2.675529000 | 0.786959000  | -0.910796000 |
| H | -1.614116000 | -0.028819000 | -0.737267000 |
| O | -1.966657000 | 1.806571000  | 0.962271000  |
| F | -5.120901000 | 1.657723000  | 0.229571000  |
| F | -4.236783000 | 3.025980000  | -1.193266000 |
| F | -4.070667000 | 3.413813000  | 0.925146000  |

---

**B1**

---

| Coordinates (Angstroms) |              |              |              |
|-------------------------|--------------|--------------|--------------|
|                         | X            | Y            | Z            |
| C                       | -3.824941000 | 3.313385000  | 0.052514000  |
| C                       | -2.687755000 | 3.948230000  | 0.625350000  |
| H                       | -2.688872000 | 4.576942000  | 1.504144000  |
| C                       | -1.543209000 | 3.561795000  | -0.123573000 |
| C                       | -3.384654000 | 2.535376000  | -1.051821000 |
| H                       | -4.006346000 | 1.922477000  | -1.687563000 |
| C                       | -1.974426000 | 2.689514000  | -1.158785000 |
| H                       | -1.342294000 | 2.227779000  | -1.898660000 |
| H                       | -4.838968000 | 3.378960000  | 0.420031000  |
| C                       | -3.275111000 | 1.189683000  | 2.432234000  |
| C                       | -1.918217000 | 1.540772000  | 2.614764000  |
| C                       | -1.106166000 | 0.761102000  | 1.739378000  |
| C                       | -3.326716000 | 0.197804000  | 1.430213000  |
| H                       | -4.233649000 | -0.248469000 | 1.064478000  |
| C                       | -1.993365000 | -0.096349000 | 0.981091000  |
| H                       | -4.125978000 | 1.642310000  | 2.920280000  |
| Fe                      | -2.467548000 | 1.910766000  | 0.686762000  |
| C                       | 0.399089000  | 0.893592000  | 1.899882000  |
| H                       | 0.566833000  | 1.968259000  | 1.957489000  |
| P                       | -1.529635000 | -1.536838000 | -0.051380000 |
| C                       | -1.820314000 | -2.965113000 | 1.176208000  |
| C                       | -1.090954000 | -2.601259000 | 2.476468000  |

|   |              |              |              |
|---|--------------|--------------|--------------|
| H | -0.029899000 | -2.414070000 | 2.296947000  |
| H | -1.524462000 | -1.726186000 | 2.964831000  |
| H | -1.167879000 | -3.445251000 | 3.169978000  |
| C | -3.303394000 | -3.188965000 | 1.495173000  |
| H | -3.860700000 | -3.561516000 | 0.634285000  |
| H | -3.374015000 | -3.947249000 | 2.282617000  |
| H | -3.792480000 | -2.287583000 | 1.867381000  |
| C | -1.222932000 | -4.284826000 | 0.664838000  |
| H | -1.415825000 | -5.056959000 | 1.417690000  |
| H | -1.665499000 | -4.620396000 | -0.272146000 |
| H | -0.143495000 | -4.213451000 | 0.527170000  |
| C | -2.760718000 | -1.661864000 | -1.506341000 |
| C | -2.776283000 | -3.092514000 | -2.066005000 |
| H | -3.307769000 | -3.784815000 | -1.410809000 |
| H | -3.308335000 | -3.073702000 | -3.023172000 |
| H | -1.773389000 | -3.480094000 | -2.251065000 |
| C | -4.210866000 | -1.257116000 | -1.215227000 |
| H | -4.799922000 | -1.463719000 | -2.115567000 |
| H | -4.660113000 | -1.821095000 | -0.397365000 |
| H | -4.302182000 | -0.191806000 | -1.008067000 |
| C | -2.226561000 | -0.728404000 | -2.601396000 |
| H | -2.125309000 | 0.295869000  | -2.244037000 |
| H | -1.258146000 | -1.065578000 | -2.981418000 |
| H | -2.931790000 | -0.724528000 | -3.439441000 |
| H | -0.523873000 | 3.856746000  | 0.075883000  |
| C | 0.820613000  | 0.359067000  | 3.276746000  |
| H | 0.233889000  | 0.879518000  | 4.037694000  |
| H | 0.641982000  | -0.707901000 | 3.399513000  |
| H | 1.872908000  | 0.565066000  | 3.475484000  |
| P | 1.414101000  | 0.381039000  | 0.392636000  |
| C | 3.096885000  | -0.092363000 | 1.016777000  |
| C | 4.336564000  | 0.364780000  | 0.525250000  |

|    |              |              |              |
|----|--------------|--------------|--------------|
| C  | 3.094354000  | -1.133217000 | 1.955115000  |
| C  | 5.503797000  | -0.154463000 | 1.100074000  |
| C  | 4.261467000  | -1.642657000 | 2.499781000  |
| H  | 2.155086000  | -1.577879000 | 2.256113000  |
| C  | 5.482080000  | -1.126235000 | 2.087003000  |
| H  | 6.459810000  | 0.205005000  | 0.731964000  |
| H  | 4.213265000  | -2.440894000 | 3.232124000  |
| H  | 6.410931000  | -1.502129000 | 2.502299000  |
| C  | 1.632531000  | 2.061332000  | -0.352207000 |
| C  | 1.370371000  | 2.344615000  | -1.700379000 |
| C  | 2.093562000  | 3.085885000  | 0.483392000  |
| C  | 1.553045000  | 3.655255000  | -2.153518000 |
| C  | 2.278063000  | 4.376985000  | 0.016669000  |
| H  | 2.342693000  | 2.872485000  | 1.517917000  |
| C  | 1.998420000  | 4.664322000  | -1.314355000 |
| H  | 1.339693000  | 3.879727000  | -3.193802000 |
| H  | 2.641195000  | 5.148878000  | 0.685861000  |
| H  | 2.129932000  | 5.669794000  | -1.699422000 |
| C  | 0.934878000  | 1.305729000  | -2.695336000 |
| H  | 1.774423000  | 0.667912000  | -2.986374000 |
| H  | 0.162350000  | 0.655004000  | -2.279592000 |
| H  | 0.531876000  | 1.775486000  | -3.594987000 |
| C  | 4.524735000  | 1.307015000  | -0.639003000 |
| H  | 3.830191000  | 1.081829000  | -1.448389000 |
| H  | 4.390376000  | 2.354663000  | -0.361822000 |
| H  | 5.537635000  | 1.194681000  | -1.031542000 |
| Ir | 0.584438000  | -1.473065000 | -0.882681000 |
| H  | 0.144397000  | -2.824439000 | -1.654025000 |
| Cl | 2.802951000  | -1.779823000 | -2.021270000 |
| H  | -1.542578000 | 2.301490000  | 3.284696000  |
| H  | 0.998445000  | -2.386460000 | 0.279875000  |

---

**B2**

---

| Coordinates (Angstroms) |              |              |              |
|-------------------------|--------------|--------------|--------------|
|                         | X            | Y            | Z            |
| C                       | -4.189323000 | 2.940290000  | 0.150340000  |
| C                       | -3.091764000 | 3.659178000  | 0.700361000  |
| H                       | -3.115159000 | 4.262966000  | 1.596044000  |
| C                       | -1.946269000 | 3.392519000  | -0.098124000 |
| C                       | -3.724366000 | 2.229892000  | -0.989701000 |
| H                       | -4.313382000 | 1.577952000  | -1.618071000 |
| C                       | -2.339322000 | 2.513495000  | -1.142120000 |
| H                       | -1.689284000 | 2.134908000  | -1.913033000 |
| H                       | -5.190257000 | 2.905603000  | 0.555563000  |
| C                       | -3.409764000 | 0.808132000  | 2.434545000  |
| C                       | -2.095504000 | 1.299668000  | 2.620735000  |
| C                       | -1.215920000 | 0.629730000  | 1.722101000  |
| C                       | -3.368648000 | -0.159167000 | 1.407672000  |
| H                       | -4.220344000 | -0.699173000 | 1.030291000  |
| C                       | -2.012706000 | -0.290380000 | 0.952402000  |
| H                       | -4.297831000 | 1.156217000  | 2.941328000  |
| Fe                      | -2.696598000 | 1.650095000  | 0.701656000  |
| C                       | 0.270796000  | 0.896588000  | 1.824803000  |
| H                       | 0.351678000  | 1.980904000  | 1.764449000  |
| P                       | -1.380281000 | -1.646742000 | -0.054807000 |
| C                       | -1.482527000 | -3.126906000 | 1.121273000  |
| C                       | -0.847896000 | -2.682900000 | 2.445653000  |
| H                       | 0.181860000  | -2.351429000 | 2.298423000  |
| H                       | -1.409788000 | -1.882288000 | 2.930678000  |
| H                       | -0.827465000 | -3.540132000 | 3.125725000  |
| C                       | -2.927306000 | -3.567015000 | 1.381037000  |
| H                       | -3.394597000 | -3.987905000 | 0.489220000  |
| H                       | -2.912754000 | -4.349687000 | 2.146729000  |
| H                       | -3.551159000 | -2.753997000 | 1.756870000  |

|   |              |              |              |
|---|--------------|--------------|--------------|
| C | -0.680082000 | -4.324822000 | 0.592321000  |
| H | -0.712695000 | -5.112616000 | 1.352033000  |
| H | -1.090066000 | -4.740633000 | -0.326987000 |
| H | 0.369541000  | -4.075053000 | 0.422475000  |
| C | -2.462759000 | -1.876044000 | -1.588330000 |
| C | -2.166623000 | -3.253190000 | -2.197480000 |
| H | -2.609741000 | -4.062700000 | -1.615412000 |
| H | -2.605382000 | -3.286396000 | -3.199778000 |
| H | -1.093515000 | -3.442070000 | -2.299871000 |
| C | -3.970113000 | -1.729189000 | -1.363668000 |
| H | -4.475258000 | -1.979126000 | -2.302946000 |
| H | -4.357130000 | -2.396170000 | -0.593406000 |
| H | -4.237506000 | -0.702360000 | -1.112539000 |
| C | -2.021808000 | -0.795931000 | -2.586624000 |
| H | -2.123834000 | 0.200191000  | -2.161541000 |
| H | -0.983628000 | -0.933906000 | -2.914605000 |
| H | -2.656884000 | -0.853924000 | -3.476358000 |
| H | -0.948987000 | 3.771284000  | 0.069481000  |
| C | 0.784762000  | 0.526627000  | 3.223087000  |
| H | 0.208489000  | 1.095869000  | 3.955202000  |
| H | 0.661269000  | -0.531129000 | 3.452657000  |
| H | 1.832815000  | 0.799049000  | 3.349379000  |
| P | 1.327371000  | 0.390689000  | 0.356944000  |
| C | 3.026980000  | 0.027101000  | 0.987568000  |
| C | 4.239519000  | 0.574741000  | 0.524888000  |
| C | 3.065106000  | -1.005373000 | 1.934128000  |
| C | 5.425333000  | 0.112516000  | 1.109219000  |
| C | 4.251349000  | -1.452857000 | 2.487620000  |
| H | 2.147953000  | -1.488533000 | 2.242014000  |
| C | 5.445489000  | -0.872278000 | 2.082409000  |
| H | 6.363468000  | 0.533892000  | 0.762862000  |
| H | 4.238678000  | -2.249523000 | 3.222462000  |



|    |              |              |              |
|----|--------------|--------------|--------------|
| H  | 6.389470000  | -1.201380000 | 2.502754000  |
| C  | 1.322270000  | 1.944611000  | -0.623622000 |
| C  | 1.704233000  | 3.196934000  | -0.105195000 |
| C  | 0.902237000  | 1.846844000  | -1.952597000 |
| C  | 1.648413000  | 4.302144000  | -0.955430000 |
| C  | 0.855586000  | 2.958831000  | -2.779184000 |
| H  | 0.600119000  | 0.888529000  | -2.360273000 |
| C  | 1.231651000  | 4.195289000  | -2.274265000 |
| H  | 1.952232000  | 5.269098000  | -0.567267000 |
| H  | 0.524507000  | 2.855122000  | -3.806079000 |
| H  | 1.206458000  | 5.076373000  | -2.906090000 |
| C  | 2.191104000  | 3.435804000  | 1.303274000  |
| H  | 1.379340000  | 3.806073000  | 1.938393000  |
| H  | 2.607330000  | 2.546896000  | 1.778457000  |
| H  | 2.968174000  | 4.202847000  | 1.298489000  |
| C  | 4.389437000  | 1.587858000  | -0.580614000 |
| H  | 3.692075000  | 1.414017000  | -1.397710000 |
| H  | 4.244021000  | 2.608202000  | -0.217768000 |
| H  | 5.400934000  | 1.527570000  | -0.986697000 |
| Ir | 0.729488000  | -1.335433000 | -0.930194000 |
| Cl | 2.937729000  | -1.339475000 | -2.145755000 |
| H  | -1.801523000 | 2.081627000  | 3.305918000  |
| H  | 1.281569000  | -2.193780000 | 0.205267000  |

---

### B3

| Coordinates (Angstroms) |              |             |              |
|-------------------------|--------------|-------------|--------------|
|                         | X            | Y           | Z            |
| C                       | -4.082334000 | 3.059245000 | 0.078495000  |
| C                       | -3.020474000 | 3.778779000 | 0.694006000  |
| H                       | -3.095941000 | 4.373083000 | 1.593102000  |
| C                       | -1.830997000 | 3.525861000 | -0.043082000 |
| C                       | -3.550833000 | 2.363031000 | -1.039511000 |

|    |              |              |              |
|----|--------------|--------------|--------------|
| H  | -4.101467000 | 1.719263000  | -1.709193000 |
| C  | -2.160708000 | 2.651722000  | -1.113091000 |
| H  | -1.469569000 | 2.274499000  | -1.848114000 |
| H  | -5.104123000 | 3.015454000  | 0.426955000  |
| C  | -3.330732000 | 0.980435000  | 2.457133000  |
| C  | -1.998301000 | 1.425326000  | 2.618282000  |
| C  | -1.154903000 | 0.708975000  | 1.721121000  |
| C  | -3.336791000 | -0.000008000 | 1.443930000  |
| H  | -4.215835000 | -0.508978000 | 1.090366000  |
| C  | -1.991203000 | -0.193725000 | 0.971080000  |
| H  | -4.200685000 | 1.369033000  | 2.965844000  |
| Fe | -2.608448000 | 1.772438000  | 0.702252000  |
| C  | 0.337956000  | 0.929671000  | 1.826557000  |
| H  | 0.452538000  | 2.010937000  | 1.789388000  |
| P  | -1.461543000 | -1.606403000 | -0.034176000 |
| C  | -1.669717000 | -3.057418000 | 1.162172000  |
| C  | -0.979467000 | -2.658651000 | 2.473677000  |
| H  | 0.072493000  | -2.411581000 | 2.309304000  |
| H  | -1.469514000 | -1.814742000 | 2.963365000  |
| H  | -1.016141000 | -3.512390000 | 3.157849000  |
| C  | -3.143927000 | -3.371190000 | 1.442147000  |
| H  | -3.660761000 | -3.743635000 | 0.556220000  |
| H  | -3.185890000 | -4.156372000 | 2.203983000  |
| H  | -3.687355000 | -2.509845000 | 1.832139000  |
| C  | -0.979275000 | -4.322523000 | 0.632362000  |
| H  | -1.171630000 | -5.133939000 | 1.341419000  |
| H  | -1.354505000 | -4.640666000 | -0.340900000 |
| H  | 0.103234000  | -4.194845000 | 0.566925000  |
| C  | -2.594408000 | -1.733234000 | -1.549097000 |
| C  | -2.549189000 | -3.140804000 | -2.161128000 |
| H  | -3.049946000 | -3.875603000 | -1.528179000 |
| H  | -3.087229000 | -3.105458000 | -3.113812000 |

|   |              |              |              |
|---|--------------|--------------|--------------|
| H | -1.540182000 | -3.492338000 | -2.374752000 |
| C | -4.065707000 | -1.387756000 | -1.296132000 |
| H | -4.606914000 | -1.542979000 | -2.235331000 |
| H | -4.525071000 | -2.028504000 | -0.542181000 |
| H | -4.201073000 | -0.346536000 | -1.011426000 |
| C | -2.015036000 | -0.723794000 | -2.552596000 |
| H | -1.970273000 | 0.278233000  | -2.127876000 |
| H | -1.008112000 | -1.012514000 | -2.879360000 |
| H | -2.653701000 | -0.691734000 | -3.441083000 |
| H | -0.846318000 | 3.905703000  | 0.184988000  |
| C | 0.834810000  | 0.513241000  | 3.218078000  |
| H | 0.267829000  | 1.075519000  | 3.962653000  |
| H | 0.686166000  | -0.547110000 | 3.419370000  |
| H | 1.888374000  | 0.756868000  | 3.356388000  |
| P | 1.364317000  | 0.391192000  | 0.355557000  |
| C | 3.055295000  | -0.006725000 | 0.990766000  |
| C | 4.281101000  | 0.537328000  | 0.561207000  |
| C | 3.066580000  | -1.050448000 | 1.926327000  |
| C | 5.450841000  | 0.063413000  | 1.169278000  |
| C | 4.237261000  | -1.509725000 | 2.502959000  |
| H | 2.138870000  | -1.530603000 | 2.209763000  |
| C | 5.443379000  | -0.930114000 | 2.133437000  |
| H | 6.398971000  | 0.483457000  | 0.849401000  |
| H | 4.203396000  | -2.313646000 | 3.229251000  |
| H | 6.375474000  | -1.267144000 | 2.573560000  |
| C | 1.395392000  | 1.916640000  | -0.659370000 |
| C | 1.770994000  | 3.187605000  | -0.184956000 |
| C | 1.016495000  | 1.762092000  | -1.994206000 |
| C | 1.741695000  | 4.253868000  | -1.084864000 |
| C | 1.004591000  | 2.832335000  | -2.874386000 |
| H | 0.721991000  | 0.782576000  | -2.349320000 |
| C | 1.367855000  | 4.089005000  | -2.411132000 |

|    |              |              |              |
|----|--------------|--------------|--------------|
| H  | 2.035754000  | 5.237220000  | -0.731682000 |
| H  | 0.709118000  | 2.683229000  | -3.906477000 |
| H  | 1.366577000  | 4.941296000  | -3.081812000 |
| C  | 2.228520000  | 3.481546000  | 1.222207000  |
| H  | 1.402464000  | 3.869284000  | 1.827782000  |
| H  | 2.640672000  | 2.610932000  | 1.734241000  |
| H  | 3.001045000  | 4.252900000  | 1.204361000  |
| C  | 4.464183000  | 1.556838000  | -0.533975000 |
| H  | 3.783374000  | 1.393933000  | -1.367135000 |
| H  | 4.320759000  | 2.576050000  | -0.167676000 |
| H  | 5.483957000  | 1.490348000  | -0.917877000 |
| Ir | 0.689700000  | -1.460011000 | -0.904680000 |
| H  | 0.274643000  | -3.145100000 | -1.386258000 |
| Cl | 2.906424000  | -1.372157000 | -2.100254000 |
| H  | -1.664883000 | 2.206472000  | 3.286294000  |
| H  | 1.253928000  | -2.227440000 | 0.294507000  |
| H  | 0.609749000  | -2.845345000 | -2.069766000 |

---

**TS<sub>B1-B2</sub>**

| Coordinates (Angstroms) |             |              |              |
|-------------------------|-------------|--------------|--------------|
|                         | X           | Y            | Z            |
| C                       | 5.959496000 | -1.017192000 | -2.131920000 |
| C                       | 5.942678000 | 0.358058000  | -1.768706000 |
| H                       | 6.333972000 | 1.173859000  | -2.359214000 |
| C                       | 5.268697000 | 0.476659000  | -0.523078000 |
| C                       | 5.297089000 | -1.749576000 | -1.110540000 |
| H                       | 5.139343000 | -2.817582000 | -1.094014000 |
| C                       | 4.869899000 | -0.825376000 | -0.118167000 |
| H                       | 4.337893000 | -1.063219000 | 0.787593000  |
| H                       | 6.368516000 | -1.427663000 | -3.043829000 |
| C                       | 3.375219000 | -0.208467000 | -3.883580000 |
| C                       | 3.151200000 | 1.005087000  | -3.193066000 |

|    |              |              |              |
|----|--------------|--------------|--------------|
| C  | 2.285877000  | 0.758036000  | -2.088700000 |
| C  | 2.668871000  | -1.223375000 | -3.204137000 |
| H  | 2.663729000  | -2.257286000 | -3.496599000 |
| C  | 1.976718000  | -0.648647000 | -2.081012000 |
| H  | 4.017867000  | -0.349445000 | -4.740232000 |
| Fe | 4.029583000  | -0.346435000 | -1.941909000 |
| C  | 1.800179000  | 1.943930000  | -1.288155000 |
| H  | 2.706694000  | 2.498336000  | -1.053924000 |
| P  | 0.655657000  | -1.498789000 | -1.148604000 |
| C  | -0.707304000 | -1.563501000 | -2.463922000 |
| C  | -0.901589000 | -0.130503000 | -2.977542000 |
| H  | -1.152856000 | 0.552582000  | -2.164210000 |
| H  | -0.018430000 | 0.247905000  | -3.495190000 |
| H  | -1.735402000 | -0.125602000 | -3.686244000 |
| C  | -0.371898000 | -2.466025000 | -3.655685000 |
| H  | -0.241329000 | -3.511035000 | -3.371289000 |
| H  | -1.208647000 | -2.421141000 | -4.361320000 |
| H  | 0.520386000  | -2.134393000 | -4.188053000 |
| C  | -2.028495000 | -2.014111000 | -1.837187000 |
| H  | -2.835679000 | -1.834408000 | -2.554725000 |
| H  | -2.037076000 | -3.075329000 | -1.591101000 |
| H  | -2.247868000 | -1.445710000 | -0.934873000 |
| C  | 1.290196000  | -3.235922000 | -0.713908000 |
| C  | 0.083480000  | -4.158870000 | -0.540186000 |
| H  | -0.329370000 | -4.469572000 | -1.500954000 |
| H  | 0.400093000  | -5.060764000 | -0.007801000 |
| H  | -0.702594000 | -3.682714000 | 0.035433000  |
| C  | 2.245885000  | -3.912135000 | -1.699576000 |
| H  | 2.468870000  | -4.909275000 | -1.303724000 |
| H  | 1.802938000  | -4.048359000 | -2.687661000 |
| H  | 3.189896000  | -3.381069000 | -1.798016000 |
| C  | 2.019636000  | -3.078449000 | 0.630301000  |

|   |              |              |              |
|---|--------------|--------------|--------------|
| H | 2.893641000  | -2.435436000 | 0.531982000  |
| H | 1.370073000  | -2.664986000 | 1.409306000  |
| H | 2.361281000  | -4.061261000 | 0.971856000  |
| H | 5.071086000  | 1.395731000  | 0.006981000  |
| C | 0.969931000  | 2.881796000  | -2.175793000 |
| H | 1.577003000  | 3.157168000  | -3.041343000 |
| H | 0.055908000  | 2.420510000  | -2.546253000 |
| H | 0.713225000  | 3.801456000  | -1.648913000 |
| P | 1.132776000  | 1.548798000  | 0.418775000  |
| C | -0.101533000 | 2.884151000  | 0.801575000  |
| C | -0.112852000 | 3.780895000  | 1.888518000  |
| C | -1.193526000 | 2.880487000  | -0.075909000 |
| C | -1.183692000 | 4.679281000  | 1.981771000  |
| C | -2.247861000 | 3.768839000  | 0.043536000  |
| H | -1.229914000 | 2.152717000  | -0.874498000 |
| C | -2.233207000 | 4.693510000  | 1.078292000  |
| H | -1.192975000 | 5.377402000  | 2.813060000  |
| H | -3.069472000 | 3.727053000  | -0.661752000 |
| H | -3.041960000 | 5.406660000  | 1.195675000  |
| C | 2.656604000  | 1.783085000  | 1.421859000  |
| C | 3.456355000  | 2.942987000  | 1.404390000  |
| C | 3.032480000  | 0.702206000  | 2.221510000  |
| C | 4.592766000  | 2.968177000  | 2.214105000  |
| C | 4.170487000  | 0.744542000  | 3.012727000  |
| H | 2.422132000  | -0.193996000 | 2.225185000  |
| C | 4.953250000  | 1.890233000  | 3.010778000  |
| H | 5.206837000  | 3.863400000  | 2.218056000  |
| H | 4.440788000  | -0.111418000 | 3.620670000  |
| H | 5.844500000  | 1.947134000  | 3.626233000  |
| C | 3.174983000  | 4.171977000  | 0.575000000  |
| H | 3.760599000  | 4.156468000  | -0.350449000 |
| H | 2.125306000  | 4.283735000  | 0.302314000  |

|    |              |              |              |
|----|--------------|--------------|--------------|
| H  | 3.473620000  | 5.066768000  | 1.125212000  |
| C  | 0.903017000  | 3.849394000  | 3.000879000  |
| H  | 1.320189000  | 2.876209000  | 3.244496000  |
| H  | 1.723840000  | 4.527020000  | 2.752184000  |
| H  | 0.422610000  | 4.242723000  | 3.899287000  |
| Ir | 0.045449000  | -0.480473000 | 0.847034000  |
| H  | -1.147060000 | -1.781668000 | 1.412844000  |
| Cl | -0.300146000 | 0.594315000  | 3.084281000  |
| H  | 3.584024000  | 1.965865000  | -3.432902000 |
| H  | -1.129312000 | 0.177341000  | 0.128366000  |
| C  | -7.186713000 | 0.543435000  | -1.381740000 |
| C  | -7.963179000 | 1.360891000  | -2.196655000 |
| C  | -7.378098000 | 2.347032000  | -2.978322000 |
| C  | -5.994406000 | 2.495425000  | -2.955532000 |
| C  | -5.239720000 | 1.661294000  | -2.161217000 |
| C  | -5.791769000 | 0.672546000  | -1.333198000 |
| H  | -7.675120000 | -0.199798000 | -0.764109000 |
| H  | -9.039259000 | 1.227222000  | -2.204051000 |
| H  | -7.982293000 | 2.991188000  | -3.605881000 |
| H  | -5.489063000 | 3.234868000  | -3.566385000 |
| C  | -4.442585000 | -2.267811000 | 0.502803000  |
| C  | -5.544950000 | -1.317027000 | 0.066736000  |
| N  | -4.972376000 | -0.132960000 | -0.549099000 |
| C  | -3.927435000 | 0.528544000  | 0.245402000  |
| C  | -3.712479000 | -0.161222000 | 1.585491000  |
| N  | -3.504227000 | -1.593615000 | 1.405969000  |
| H  | -4.908205000 | -3.110999000 | 1.020543000  |
| H  | -6.151694000 | -1.846865000 | -0.669394000 |
| H  | -2.986804000 | 0.540864000  | -0.308336000 |
| H  | -2.821828000 | 0.277098000  | 2.032807000  |
| C  | -1.280263000 | -4.436760000 | 2.516983000  |
| C  | -2.448190000 | -3.743993000 | 1.816169000  |

|   |              |              |              |
|---|--------------|--------------|--------------|
| C | -2.505702000 | -2.246971000 | 2.044193000  |
| C | -2.288465000 | -1.876644000 | 3.501002000  |
| C | -1.124048000 | -2.590033000 | 4.173655000  |
| C | -1.224292000 | -4.101374000 | 4.002293000  |
| H | -1.373244000 | -5.514653000 | 2.357756000  |
| H | -2.472690000 | -3.978570000 | 0.751745000  |
| H | -2.203773000 | -0.804113000 | 3.638545000  |
| H | -0.183632000 | -2.231336000 | 3.742788000  |
| H | -2.124634000 | -4.474323000 | 4.506152000  |
| H | -3.383804000 | -4.136745000 | 2.236762000  |
| H | -3.226296000 | -2.192993000 | 3.979279000  |
| H | -1.111985000 | -2.314668000 | 5.232298000  |
| H | -0.365937000 | -4.596809000 | 4.465543000  |
| H | -0.337821000 | -4.126317000 | 2.061005000  |
| F | -3.888325000 | 1.787599000  | -2.211659000 |
| H | -6.198540000 | -1.075706000 | 0.917901000  |
| H | -3.932312000 | -2.658123000 | -0.378798000 |
| H | -4.554574000 | 0.024257000  | 2.260396000  |
| H | -4.199461000 | 1.568609000  | 0.450105000  |

---

**TS<sub>B3-B1</sub>**

| Coordinates (Angstroms) |             |              |             |
|-------------------------|-------------|--------------|-------------|
|                         | X           | Y            | Z           |
| C                       | 4.018380000 | -2.971069000 | 2.128157000 |
| C                       | 4.718135000 | -1.732394000 | 2.110300000 |
| H                       | 5.762761000 | -1.597138000 | 1.869461000 |
| C                       | 3.788537000 | -0.696985000 | 2.404653000 |
| C                       | 2.658873000 | -2.701546000 | 2.433865000 |
| H                       | 1.868307000 | -3.432423000 | 2.513410000 |
| C                       | 2.516200000 | -1.296601000 | 2.601307000 |
| H                       | 1.600749000 | -0.776165000 | 2.830167000 |
| H                       | 4.440949000 | -3.940560000 | 1.906620000 |



|    |              |              |              |
|----|--------------|--------------|--------------|
| C  | 4.121769000  | -2.230110000 | -1.066184000 |
| C  | 4.084950000  | -0.824868000 | -0.918335000 |
| C  | 2.727559000  | -0.400611000 | -0.817646000 |
| C  | 2.790729000  | -2.697475000 | -1.038397000 |
| H  | 2.506575000  | -3.732777000 | -1.106249000 |
| C  | 1.898519000  | -1.577064000 | -0.901970000 |
| H  | 5.008339000  | -2.845096000 | -1.119331000 |
| Fe | 3.229678000  | -1.707984000 | 0.706840000  |
| C  | 2.462280000  | 1.091266000  | -0.799307000 |
| H  | 3.135413000  | 1.481855000  | -0.039611000 |
| P  | 0.104764000  | -1.654691000 | -1.220861000 |
| C  | 0.056970000  | -2.088906000 | -3.068036000 |
| C  | 1.009044000  | -1.119757000 | -3.784465000 |
| H  | 0.760135000  | -0.077338000 | -3.568916000 |
| H  | 2.054250000  | -1.291866000 | -3.517902000 |
| H  | 0.907658000  | -1.269889000 | -4.864282000 |
| C  | 0.501152000  | -3.528012000 | -3.357649000 |
| H  | -0.195684000 | -4.263635000 | -2.952920000 |
| H  | 0.527231000  | -3.664667000 | -4.444000000 |
| H  | 1.500769000  | -3.745622000 | -2.981515000 |
| C  | -1.350867000 | -1.887681000 | -3.649572000 |
| H  | -1.336611000 | -2.222842000 | -4.691870000 |
| H  | -2.115881000 | -2.463059000 | -3.127070000 |
| H  | -1.645147000 | -0.837574000 | -3.641548000 |
| C  | -0.611675000 | -3.039968000 | -0.145194000 |
| C  | -1.966603000 | -3.513780000 | -0.688650000 |
| H  | -1.857203000 | -4.091749000 | -1.608038000 |
| H  | -2.416787000 | -4.172242000 | 0.061898000  |
| H  | -2.668387000 | -2.701264000 | -0.867724000 |
| C  | 0.276146000  | -4.276099000 | 0.031702000  |
| H  | -0.268814000 | -4.986568000 | 0.662825000  |
| H  | 0.495013000  | -4.777796000 | -0.912223000 |

|   |              |              |              |
|---|--------------|--------------|--------------|
| H | 1.211837000  | -4.043819000 | 0.535116000  |
| C | -0.825516000 | -2.379998000 | 1.223747000  |
| H | 0.110607000  | -2.007807000 | 1.641887000  |
| H | -1.524172000 | -1.542801000 | 1.149213000  |
| H | -1.246223000 | -3.111364000 | 1.921745000  |
| H | 4.005696000  | 0.360187000  | 2.438942000  |
| C | 2.939216000  | 1.699593000  | -2.127067000 |
| H | 3.985564000  | 1.424989000  | -2.274221000 |
| H | 2.376848000  | 1.327372000  | -2.984108000 |
| H | 2.885914000  | 2.787986000  | -2.112702000 |
| P | 0.770200000  | 1.620721000  | -0.195222000 |
| C | 0.475973000  | 3.310568000  | -0.895018000 |
| C | 0.179564000  | 4.498296000  | -0.199974000 |
| C | 0.409048000  | 3.316117000  | -2.295147000 |
| C | -0.064645000 | 5.653558000  | -0.954357000 |
| C | 0.152403000  | 4.466785000  | -3.019330000 |
| H | 0.541336000  | 2.390667000  | -2.840555000 |
| C | -0.066411000 | 5.656903000  | -2.339136000 |
| H | -0.285690000 | 6.574584000  | -0.424312000 |
| H | 0.113251000  | 4.426551000  | -4.102101000 |
| H | -0.267116000 | 6.575670000  | -2.879547000 |
| C | 0.972635000  | 1.706952000  | 1.626449000  |
| C | 2.016199000  | 2.361459000  | 2.305080000  |
| C | -0.029777000 | 1.065217000  | 2.362179000  |
| C | 2.021250000  | 2.315259000  | 3.700855000  |
| C | -0.021123000 | 1.054468000  | 3.747990000  |
| H | -0.835620000 | 0.554638000  | 1.848239000  |
| C | 1.020997000  | 1.677877000  | 4.420781000  |
| H | 2.824614000  | 2.815629000  | 4.232494000  |
| H | -0.815455000 | 0.553995000  | 4.289755000  |
| H | 1.054722000  | 1.675593000  | 5.504865000  |
| C | 3.112282000  | 3.152003000  | 1.634703000  |

|    |              |              |              |
|----|--------------|--------------|--------------|
| H  | 4.017516000  | 2.548108000  | 1.511553000  |
| H  | 2.826810000  | 3.536850000  | 0.654262000  |
| H  | 3.383714000  | 4.006250000  | 2.258928000  |
| C  | 0.028615000  | 4.632346000  | 1.294119000  |
| H  | -0.529686000 | 3.802129000  | 1.725653000  |
| H  | 0.992522000  | 4.691401000  | 1.803206000  |
| H  | -0.513041000 | 5.552947000  | 1.519282000  |
| Ir | -1.081368000 | 0.277404000  | -0.762895000 |
| H  | -2.354677000 | -0.554842000 | -1.479955000 |
| Cl | -2.589235000 | 2.238559000  | -0.374618000 |
| H  | 4.940939000  | -0.168127000 | -0.853937000 |
| H  | -0.847693000 | 0.720957000  | -2.209396000 |
| H  | -2.947501000 | -0.559185000 | -0.722840000 |
| C  | -4.277915000 | -0.745645000 | 1.093847000  |
| O  | -4.135541000 | -0.873297000 | -0.157429000 |
| C  | -5.708051000 | -1.134243000 | 1.551001000  |
| O  | -3.474997000 | -0.395292000 | 1.945298000  |
| F  | -5.897790000 | -0.925956000 | 2.855289000  |
| F  | -5.940082000 | -2.436807000 | 1.311319000  |
| F  | -6.640704000 | -0.434467000 | 0.887555000  |

---

**c1**

---

| Coordinates (Angstroms) |              |              |              |
|-------------------------|--------------|--------------|--------------|
|                         | X            | Y            | Z            |
| C                       | -3.289846000 | -0.486314000 | -3.322221000 |
| C                       | -4.177640000 | 0.624398000  | -3.266919000 |
| H                       | -4.017330000 | 1.590894000  | -3.722287000 |
| C                       | -5.291009000 | 0.258082000  | -2.460014000 |
| H                       | -6.119045000 | 0.899719000  | -2.195459000 |
| C                       | -3.860961000 | -1.537133000 | -2.556818000 |
| H                       | -3.428469000 | -2.512383000 | -2.407567000 |
| C                       | -5.091827000 | -1.079244000 | -2.015121000 |

|    |              |              |              |
|----|--------------|--------------|--------------|
| H  | -5.750203000 | -1.641599000 | -1.368853000 |
| H  | -2.340104000 | -0.520515000 | -3.836336000 |
| C  | -1.793058000 | 0.924696000  | -0.654898000 |
| C  | -2.807384000 | 1.923507000  | -0.719411000 |
| C  | -3.891839000 | 1.523395000  | 0.097688000  |
| H  | -4.829173000 | 2.046719000  | 0.217422000  |
| C  | -2.236118000 | -0.096358000 | 0.265624000  |
| C  | -3.559303000 | 0.274869000  | 0.673631000  |
| H  | -4.203663000 | -0.282714000 | 1.331412000  |
| Fe | -3.558919000 | 0.144712000  | -1.379529000 |
| P  | -1.128369000 | -1.311582000 | 1.115576000  |
| H  | -2.781067000 | 2.815319000  | -1.326119000 |
| C  | -0.473882000 | 1.023621000  | -1.382404000 |
| H  | -0.176930000 | 0.027378000  | -1.716086000 |
| C  | -0.566989000 | 1.943319000  | -2.598316000 |
| H  | -1.312457000 | 1.548260000  | -3.292923000 |
| H  | -0.870093000 | 2.954859000  | -2.327833000 |
| H  | 0.382880000  | 2.009259000  | -3.128519000 |
| P  | 0.795374000  | 1.434188000  | -0.062534000 |
| Ir | 1.029807000  | -0.544736000 | 1.322330000  |
| Cl | 3.379351000  | 0.048918000  | 2.034508000  |
| H  | 0.504690000  | 0.165747000  | 2.598522000  |
| O  | 3.130831000  | -3.325862000 | 0.457921000  |
| C  | 2.821572000  | -2.578867000 | -0.470764000 |
| C  | 3.323681000  | -3.026194000 | -1.871641000 |
| O  | 2.116812000  | -1.546651000 | -0.498925000 |
| F  | 2.480392000  | -3.955965000 | -2.372837000 |
| F  | 4.539269000  | -3.587013000 | -1.820616000 |
| F  | 3.382336000  | -2.033043000 | -2.768766000 |
| H  | 1.242475000  | -1.867774000 | 2.206178000  |
| C  | 2.370135000  | 1.838604000  | -0.915567000 |
| C  | 3.355892000  | 2.648313000  | -0.320079000 |

|   |              |              |              |
|---|--------------|--------------|--------------|
| C | 2.646131000  | 1.200884000  | -2.128150000 |
| C | 4.556890000  | 2.837895000  | -1.006022000 |
| C | 3.851155000  | 1.395543000  | -2.788581000 |
| H | 1.918942000  | 0.527093000  | -2.563745000 |
| C | 4.807653000  | 2.231936000  | -2.229921000 |
| H | 5.318094000  | 3.468822000  | -0.556916000 |
| H | 4.039156000  | 0.891187000  | -3.729841000 |
| H | 5.753953000  | 2.398525000  | -2.733517000 |
| C | 0.090044000  | 3.007190000  | 0.606691000  |
| C | 0.105492000  | 4.273920000  | -0.008738000 |
| C | -0.625076000 | 2.842303000  | 1.797887000  |
| C | -0.607798000 | 5.311017000  | 0.603838000  |
| C | -1.327973000 | 3.881062000  | 2.386371000  |
| H | -0.630461000 | 1.868529000  | 2.267077000  |
| C | -1.319474000 | 5.130063000  | 1.779642000  |
| H | -0.596981000 | 6.290065000  | 0.133920000  |
| H | -1.872874000 | 3.712866000  | 3.308880000  |
| H | -1.859701000 | 5.961699000  | 2.219354000  |
| C | 0.868349000  | 4.640675000  | -1.259065000 |
| H | 1.209982000  | 3.786985000  | -1.834519000 |
| H | 0.245221000  | 5.262205000  | -1.907235000 |
| H | 1.751799000  | 5.231872000  | -0.995588000 |
| C | 3.183045000  | 3.328717000  | 1.013332000  |
| H | 2.694884000  | 4.301892000  | 0.905595000  |
| H | 2.594260000  | 2.726131000  | 1.704398000  |
| H | 4.159855000  | 3.498109000  | 1.471569000  |
| C | -1.919798000 | -1.543092000 | 2.852425000  |
| C | -3.239521000 | -2.336147000 | 2.845530000  |
| H | -3.737605000 | -2.179970000 | 3.808124000  |
| H | -3.940494000 | -2.054300000 | 2.062349000  |
| H | -3.048851000 | -3.405772000 | 2.753603000  |
| C | -0.962723000 | -2.308931000 | 3.783944000  |

|   |              |              |              |
|---|--------------|--------------|--------------|
| H | -0.624908000 | -3.256541000 | 3.363705000  |
| H | -0.083349000 | -1.720239000 | 4.040570000  |
| H | -1.504976000 | -2.530103000 | 4.710139000  |
| C | -2.153590000 | -0.171002000 | 3.509756000  |
| H | -1.217140000 | 0.371883000  | 3.641690000  |
| H | -2.848956000 | 0.466690000  | 2.965384000  |
| H | -2.572140000 | -0.342878000 | 4.507144000  |
| C | -1.288967000 | -2.918569000 | 0.114307000  |
| C | -2.725461000 | -3.451238000 | -0.002334000 |
| H | -2.779215000 | -4.112722000 | -0.873842000 |
| H | -3.012097000 | -4.043659000 | 0.864500000  |
| H | -3.463965000 | -2.661221000 | -0.140212000 |
| C | -0.410272000 | -4.020395000 | 0.715880000  |
| H | -0.416422000 | -4.878548000 | 0.033744000  |
| H | 0.625281000  | -3.704175000 | 0.847166000  |
| H | -0.794921000 | -4.367561000 | 1.677020000  |
| C | -0.772685000 | -2.591479000 | -1.296198000 |
| H | 0.259096000  | -2.247422000 | -1.280307000 |
| H | -0.821497000 | -3.500318000 | -1.905972000 |
| H | -1.382950000 | -1.830856000 | -1.781867000 |

---

## C2

---

| Coordinates (Angstroms) |              |              |              |
|-------------------------|--------------|--------------|--------------|
|                         | X            | Y            | Z            |
| C                       | -3.677571000 | -0.483842000 | -3.197865000 |
| C                       | -4.735089000 | 0.414036000  | -2.881780000 |
| H                       | -4.815772000 | 1.441794000  | -3.204865000 |
| C                       | -5.641328000 | -0.261406000 | -2.017157000 |
| H                       | -6.527721000 | 0.165984000  | -1.571312000 |
| C                       | -3.935981000 | -1.710772000 | -2.533605000 |
| H                       | -3.315174000 | -2.590233000 | -2.576771000 |
| C                       | -5.143510000 | -1.576187000 | -1.796809000 |

|    |              |              |              |
|----|--------------|--------------|--------------|
| H  | -5.592472000 | -2.330445000 | -1.166786000 |
| H  | -2.819151000 | -0.267938000 | -3.817063000 |
| C  | -2.072950000 | 0.768267000  | -0.511713000 |
| C  | -3.192206000 | 1.637766000  | -0.390468000 |
| C  | -4.144091000 | 1.028188000  | 0.466976000  |
| H  | -5.119249000 | 1.422471000  | 0.712251000  |
| C  | -2.316773000 | -0.378183000 | 0.324236000  |
| C  | -3.622333000 | -0.219134000 | 0.887406000  |
| H  | -4.123720000 | -0.922430000 | 1.533450000  |
| Fe | -3.787335000 | -0.158286000 | -1.161825000 |
| P  | -0.988602000 | -1.481227000 | 0.898448000  |
| H  | -3.322293000 | 2.579805000  | -0.900726000 |
| C  | -0.827797000 | 1.041960000  | -1.311438000 |
| H  | -0.489902000 | 0.114179000  | -1.773503000 |
| C  | -1.062168000 | 2.081040000  | -2.405244000 |
| H  | -1.812466000 | 1.694971000  | -3.098779000 |
| H  | -1.435579000 | 3.022254000  | -2.002899000 |
| H  | -0.153223000 | 2.284982000  | -2.971188000 |
| P  | 0.515545000  | 1.439070000  | -0.079210000 |
| Ir | 1.058266000  | -0.382464000 | 1.112656000  |
| Cl | 3.265570000  | 0.354099000  | 1.985695000  |
| H  | 0.419897000  | 0.302028000  | 2.335348000  |
| O  | 3.322898000  | -2.958962000 | 0.628263000  |
| C  | 3.158487000  | -2.231740000 | -0.349216000 |
| C  | 4.141464000  | -2.391951000 | -1.538953000 |
| O  | 2.310157000  | -1.334474000 | -0.560587000 |
| F  | 4.841663000  | -3.528762000 | -1.478736000 |
| F  | 5.025810000  | -1.376221000 | -1.554860000 |
| F  | 3.504925000  | -2.375896000 | -2.721808000 |
| C  | 2.019011000  | 1.904916000  | -1.012488000 |
| C  | 3.019216000  | 2.751798000  | -0.501708000 |
| C  | 2.209424000  | 1.258008000  | -2.238010000 |

|   |              |              |              |
|---|--------------|--------------|--------------|
| C | 4.164358000  | 2.945037000  | -1.276266000 |
| C | 3.358563000  | 1.462623000  | -2.984990000 |
| H | 1.463167000  | 0.569190000  | -2.614267000 |
| C | 4.339212000  | 2.318314000  | -2.501711000 |
| H | 4.941845000  | 3.600291000  | -0.896269000 |
| H | 3.488102000  | 0.948102000  | -3.930104000 |
| H | 5.247305000  | 2.488458000  | -3.069894000 |
| C | -0.213630000 | 2.909015000  | 0.766768000  |
| C | -0.268377000 | 4.207464000  | 0.219725000  |
| C | -0.896564000 | 2.648481000  | 1.960853000  |
| C | -0.978817000 | 5.185158000  | 0.926204000  |
| C | -1.599542000 | 3.631220000  | 2.635833000  |
| H | -0.893934000 | 1.648850000  | 2.367106000  |
| C | -1.635199000 | 4.917557000  | 2.115085000  |
| H | -1.014277000 | 6.188172000  | 0.512030000  |
| H | -2.115724000 | 3.388106000  | 3.557631000  |
| H | -2.174822000 | 5.707089000  | 2.626640000  |
| C | 0.370524000  | 4.681885000  | -1.064825000 |
| H | 0.845516000  | 3.901484000  | -1.648666000 |
| H | -0.386327000 | 5.156115000  | -1.694861000 |
| H | 1.125860000  | 5.441808000  | -0.844866000 |
| C | 2.930364000  | 3.479702000  | 0.813599000  |
| H | 2.493394000  | 4.473367000  | 0.679800000  |
| H | 2.339861000  | 2.944877000  | 1.554336000  |
| H | 3.931901000  | 3.614547000  | 1.226753000  |
| C | -1.379972000 | -2.005207000 | 2.691977000  |
| C | -2.455762000 | -3.091730000 | 2.804688000  |
| H | -2.690275000 | -3.230062000 | 3.865213000  |
| H | -3.383236000 | -2.835501000 | 2.289591000  |
| H | -2.100535000 | -4.049603000 | 2.425402000  |
| C | -0.073312000 | -2.545195000 | 3.308803000  |
| H | 0.289095000  | -3.446654000 | 2.815795000  |



|   |              |              |              |
|---|--------------|--------------|--------------|
| H | 0.724933000  | -1.793277000 | 3.291653000  |
| H | -0.265204000 | -2.793797000 | 4.357802000  |
| C | -1.813379000 | -0.795236000 | 3.536610000  |
| H | -1.025272000 | -0.046376000 | 3.614624000  |
| H | -2.718908000 | -0.312527000 | 3.171005000  |
| H | -2.015852000 | -1.155468000 | 4.550318000  |
| C | -0.986679000 | -2.995306000 | -0.232291000 |
| C | -2.367699000 | -3.667831000 | -0.312815000 |
| H | -2.428457000 | -4.227999000 | -1.251419000 |
| H | -2.519359000 | -4.379875000 | 0.496270000  |
| H | -3.189932000 | -2.952567000 | -0.299186000 |
| C | 0.044318000  | -4.028699000 | 0.234315000  |
| H | 0.139649000  | -4.794428000 | -0.543371000 |
| H | 1.032203000  | -3.595567000 | 0.396129000  |
| H | -0.271675000 | -4.532930000 | 1.148965000  |
| C | -0.577626000 | -2.493639000 | -1.626300000 |
| H | 0.416010000  | -2.043070000 | -1.616275000 |
| H | -0.555613000 | -3.349124000 | -2.309273000 |
| H | -1.292787000 | -1.774108000 | -2.025516000 |

---

### C3

| Coordinates (Angstroms) |             |              |             |
|-------------------------|-------------|--------------|-------------|
|                         | X           | Y            | Z           |
| C                       | 3.245860000 | -0.405465000 | 3.379231000 |
| C                       | 4.049272000 | 0.768492000  | 3.370508000 |
| H                       | 3.799771000 | 1.714196000  | 3.829341000 |
| C                       | 5.213617000 | 0.497975000  | 2.599445000 |
| H                       | 5.998779000 | 1.204288000  | 2.372035000 |
| C                       | 3.922867000 | -1.400363000 | 2.625309000 |
| H                       | 3.570080000 | -2.402961000 | 2.449385000 |
| C                       | 5.133603000 | -0.844906000 | 2.133830000 |
| H                       | 5.854514000 | -1.345907000 | 1.504057000 |

|    |              |              |              |
|----|--------------|--------------|--------------|
| H  | 2.284258000  | -0.517901000 | 3.858901000  |
| C  | 1.756805000  | 0.966086000  | 0.690704000  |
| C  | 2.712913000  | 2.016899000  | 0.787612000  |
| C  | 3.836561000  | 1.682760000  | -0.006345000 |
| H  | 4.746963000  | 2.256941000  | -0.095208000 |
| C  | 2.280567000  | -0.018601000 | -0.225747000 |
| C  | 3.589665000  | 0.424908000  | -0.603017000 |
| H  | 4.276939000  | -0.093391000 | -1.250472000 |
| Fe | 3.535414000  | 0.272345000  | 1.453836000  |
| P  | 1.279513000  | -1.287737000 | -1.087637000 |
| H  | 2.626243000  | 2.899773000  | 1.401466000  |
| C  | 0.412869000  | 0.972722000  | 1.376513000  |
| H  | 0.161510000  | -0.040763000 | 1.694806000  |
| C  | 0.408241000  | 1.887285000  | 2.600118000  |
| H  | 1.147438000  | 1.516529000  | 3.313653000  |
| H  | 0.670547000  | 2.915138000  | 2.351693000  |
| H  | -0.560982000 | 1.898363000  | 3.096723000  |
| P  | -0.828491000 | 1.332646000  | 0.025078000  |
| Ir | -0.983944000 | -0.638564000 | -1.290102000 |
| Cl | -3.341573000 | -0.186131000 | -1.942093000 |
| H  | -0.509630000 | 0.135450000  | -2.546864000 |
| O  | -2.791464000 | -3.400827000 | -0.269190000 |
| C  | -2.646842000 | -2.551741000 | 0.606147000  |
| C  | -3.448387000 | -2.755134000 | 1.918877000  |
| O  | -1.957227000 | -1.503308000 | 0.621956000  |
| F  | -3.737443000 | -4.042478000 | 2.140229000  |
| F  | -4.616568000 | -2.088434000 | 1.855606000  |
| F  | -2.793608000 | -2.303364000 | 2.999310000  |
| H  | -1.179229000 | -1.766924000 | -2.590651000 |
| C  | -2.457358000 | 1.688867000  | 0.778419000  |
| C  | -3.428953000 | 2.477058000  | 0.135255000  |
| C  | -2.755469000 | 1.070797000  | 1.995240000  |

|   |              |              |              |
|---|--------------|--------------|--------------|
| C | -4.651904000 | 2.661989000  | 0.782508000  |
| C | -3.981888000 | 1.261029000  | 2.613418000  |
| H | -2.034975000 | 0.413731000  | 2.463121000  |
| C | -4.930641000 | 2.073869000  | 2.008313000  |
| H | -5.407738000 | 3.272745000  | 0.298533000  |
| H | -4.192499000 | 0.769686000  | 3.556436000  |
| H | -5.894227000 | 2.235898000  | 2.479322000  |
| C | -0.159843000 | 2.887259000  | -0.693313000 |
| C | -0.240256000 | 4.157695000  | -0.089319000 |
| C | 0.598162000  | 2.731279000  | -1.856284000 |
| C | 0.453297000  | 5.210628000  | -0.696523000 |
| C | 1.279277000  | 3.787006000  | -2.437404000 |
| H | 0.663333000  | 1.754566000  | -2.307890000 |
| C | 1.204948000  | 5.041955000  | -1.848232000 |
| H | 0.392976000  | 6.193435000  | -0.239172000 |
| H | 1.859786000  | 3.625605000  | -3.338777000 |
| H | 1.727522000  | 5.887589000  | -2.281970000 |
| C | -1.041121000 | 4.519948000  | 1.138458000  |
| H | -1.386400000 | 3.670109000  | 1.716883000  |
| H | -0.441521000 | 5.155929000  | 1.794226000  |
| H | -1.924592000 | 5.096839000  | 0.846259000  |
| C | -3.232746000 | 3.135310000  | -1.206088000 |
| H | -2.799566000 | 4.134141000  | -1.099092000 |
| H | -2.587382000 | 2.554710000  | -1.864105000 |
| H | -4.198142000 | 3.246984000  | -1.703830000 |
| C | 2.031076000  | -1.453512000 | -2.844156000 |
| C | 3.375533000  | -2.201378000 | -2.857784000 |
| H | 3.842161000  | -2.039557000 | -3.834438000 |
| H | 4.082745000  | -1.876142000 | -2.096642000 |
| H | 3.225226000  | -3.275163000 | -2.747225000 |
| C | 1.080591000  | -2.235535000 | -3.770656000 |
| H | 0.729211000  | -3.174380000 | -3.342208000 |

|   |              |              |              |
|---|--------------|--------------|--------------|
| H | 0.216027000  | -1.638932000 | -4.063669000 |
| H | 1.632428000  | -2.475863000 | -4.684910000 |
| C | 2.213955000  | -0.067050000 | -3.483442000 |
| H | 1.256228000  | 0.430454000  | -3.637957000 |
| H | 2.868594000  | 0.597378000  | -2.920780000 |
| H | 2.659206000  | -0.214134000 | -4.472577000 |
| C | 1.514197000  | -2.898043000 | -0.113426000 |
| C | 2.988983000  | -3.315857000 | 0.009671000  |
| H | 3.084920000  | -3.976083000 | 0.877434000  |
| H | 3.326066000  | -3.879430000 | -0.857320000 |
| H | 3.663068000  | -2.472379000 | 0.158845000  |
| C | 0.733483000  | -4.056920000 | -0.741966000 |
| H | 0.840683000  | -4.929941000 | -0.088868000 |
| H | -0.334294000 | -3.847673000 | -0.828850000 |
| H | 1.127178000  | -4.335105000 | -1.720925000 |
| C | 0.954617000  | -2.637804000 | 1.293537000  |
| H | -0.108080000 | -2.408111000 | 1.273900000  |
| H | 1.097001000  | -3.542695000 | 1.893114000  |
| H | 1.475553000  | -1.821508000 | 1.792583000  |
| H | -1.238614000 | -2.261974000 | -1.911169000 |

---

**TS<sub>c1-c2</sub>**

| Coordinates (Angstroms) |              |              |              |
|-------------------------|--------------|--------------|--------------|
|                         | X            | Y            | Z            |
| C                       | -5.001784000 | -2.784083000 | -1.570755000 |
| C                       | -4.972599000 | -4.063924000 | -0.950901000 |
| H                       | -5.413868000 | -4.318241000 | 0.001975000  |
| C                       | -4.211089000 | -4.935922000 | -1.778279000 |
| H                       | -3.976898000 | -5.968419000 | -1.563002000 |
| C                       | -4.267423000 | -2.871185000 | -2.783116000 |
| H                       | -4.115254000 | -2.066381000 | -3.483148000 |
| C                       | -3.769050000 | -4.195284000 | -2.910760000 |

|    |              |              |              |
|----|--------------|--------------|--------------|
| H  | -3.153304000 | -4.569216000 | -3.716118000 |
| H  | -5.479059000 | -1.896928000 | -1.180495000 |
| C  | -2.229011000 | -2.101775000 | 0.244083000  |
| C  | -2.390698000 | -3.415395000 | 0.767690000  |
| C  | -1.638924000 | -4.309278000 | -0.028052000 |
| H  | -1.590365000 | -5.382010000 | 0.088395000  |
| C  | -1.340046000 | -2.171538000 | -0.885705000 |
| C  | -1.013727000 | -3.561424000 | -1.051140000 |
| H  | -0.383427000 | -3.995615000 | -1.805565000 |
| Fe | -3.062273000 | -3.361114000 | -1.158510000 |
| P  | -0.456206000 | -0.723028000 | -1.618527000 |
| H  | -3.004014000 | -3.692789000 | 1.610347000  |
| C  | -2.734280000 | -0.861106000 | 0.919045000  |
| H  | -2.965957000 | -0.098498000 | 0.177146000  |
| C  | -3.997015000 | -1.124952000 | 1.736549000  |
| H  | -4.797095000 | -1.400339000 | 1.044065000  |
| H  | -3.877717000 | -1.940300000 | 2.446254000  |
| H  | -4.322899000 | -0.244471000 | 2.288517000  |
| P  | -1.192485000 | -0.173292000 | 1.745664000  |
| Ir | 0.161597000  | 0.859257000  | 0.076989000  |
| Cl | 1.051990000  | 2.253507000  | 1.916852000  |
| H  | 1.338346000  | -0.071511000 | 0.382181000  |
| O  | -2.003199000 | 4.395392000  | 0.826801000  |
| C  | -2.296349000 | 3.553772000  | -0.023341000 |
| C  | -3.581158000 | 3.832123000  | -0.859730000 |
| O  | -1.747635000 | 2.480417000  | -0.342146000 |
| F  | -4.130733000 | 5.023106000  | -0.600876000 |
| F  | -4.526438000 | 2.900039000  | -0.611605000 |
| F  | -3.333197000 | 3.789315000  | -2.182367000 |
| H  | 1.297073000  | 1.852890000  | -0.956581000 |
| C  | -1.767045000 | 1.053645000  | 2.986672000  |
| C  | -1.128063000 | 1.318916000  | 4.212929000  |

|   |              |              |              |
|---|--------------|--------------|--------------|
| C | -2.888698000 | 1.801461000  | 2.620768000  |
| C | -1.684436000 | 2.295216000  | 5.041208000  |
| C | -3.415884000 | 2.776495000  | 3.453958000  |
| H | -3.357797000 | 1.634536000  | 1.659628000  |
| C | -2.814842000 | 3.015714000  | 4.680962000  |
| H | -1.201044000 | 2.502958000  | 5.990962000  |
| H | -4.282477000 | 3.345392000  | 3.136912000  |
| H | -3.211536000 | 3.770819000  | 5.351121000  |
| C | -0.516439000 | -1.641718000 | 2.638780000  |
| C | -1.116130000 | -2.268032000 | 3.748475000  |
| C | 0.622131000  | -2.220886000 | 2.069827000  |
| C | -0.540640000 | -3.449885000 | 4.226725000  |
| C | 1.172558000  | -3.395223000 | 2.555823000  |
| H | 1.080944000  | -1.744617000 | 1.217164000  |
| C | 0.581705000  | -4.018261000 | 3.646701000  |
| H | -0.998704000 | -3.931704000 | 5.085406000  |
| H | 2.053498000  | -3.815653000 | 2.083500000  |
| H | 0.993447000  | -4.938023000 | 4.047960000  |
| C | -2.327094000 | -1.781462000 | 4.506966000  |
| H | -2.766547000 | -0.871319000 | 4.112831000  |
| H | -3.098835000 | -2.555999000 | 4.511342000  |
| H | -2.057016000 | -1.593574000 | 5.550474000  |
| C | 0.116456000  | 0.624131000  | 4.702281000  |
| H | -0.131465000 | -0.247515000 | 5.315126000  |
| H | 0.760508000  | 0.297627000  | 3.888928000  |
| H | 0.693942000  | 1.309088000  | 5.327301000  |
| C | 1.043812000  | -1.558732000 | -2.447938000 |
| C | 0.711721000  | -2.615751000 | -3.533527000 |
| H | 1.438501000  | -3.430647000 | -3.469316000 |
| H | -0.279009000 | -3.055443000 | -3.470837000 |
| H | 0.802212000  | -2.180945000 | -4.529683000 |
| C | 1.880485000  | -0.469585000 | -3.112830000 |

|   |              |              |              |
|---|--------------|--------------|--------------|
| H | 1.359597000  | -0.005971000 | -3.949936000 |
| H | 2.153682000  | 0.290945000  | -2.386790000 |
| H | 2.797316000  | -0.917808000 | -3.508334000 |
| C | 1.920457000  | -2.202322000 | -1.358306000 |
| H | 2.304391000  | -1.457221000 | -0.661013000 |
| H | 1.404215000  | -2.975175000 | -0.788454000 |
| H | 2.782902000  | -2.668206000 | -1.845410000 |
| C | -1.583331000 | 0.002257000  | -2.970370000 |
| C | -1.769306000 | -0.919994000 | -4.177655000 |
| H | -2.583123000 | -0.520392000 | -4.793105000 |
| H | -0.874994000 | -0.949936000 | -4.800144000 |
| H | -2.031469000 | -1.939707000 | -3.898541000 |
| C | -1.016108000 | 1.338454000  | -3.465278000 |
| H | -1.803709000 | 1.876355000  | -4.003026000 |
| H | -0.684516000 | 1.964097000  | -2.640070000 |
| H | -0.184944000 | 1.205816000  | -4.158010000 |
| C | -2.945453000 | 0.286512000  | -2.322741000 |
| H | -2.851600000 | 1.048290000  | -1.552011000 |
| H | -3.623819000 | 0.668126000  | -3.093101000 |
| H | -3.394946000 | -0.607472000 | -1.895502000 |
| C | 5.030712000  | 0.046642000  | -1.763365000 |
| C | 4.498209000  | 1.418066000  | -2.149634000 |
| C | 4.149134000  | 1.908839000  | 0.210718000  |
| C | 4.654776000  | 0.517712000  | 0.536914000  |
| C | 6.373142000  | -1.066816000 | -0.075938000 |
| C | 6.306098000  | -2.286635000 | -0.755284000 |
| C | 7.073463000  | -3.378606000 | -0.358555000 |
| C | 7.917820000  | -3.285977000 | 0.737939000  |
| C | 8.003653000  | -2.083306000 | 1.434217000  |
| C | 7.249649000  | -1.009554000 | 1.014619000  |
| H | 5.773782000  | -0.242042000 | -2.509799000 |
| H | 3.996923000  | 1.322380000  | -3.107716000 |

|   |              |              |              |
|---|--------------|--------------|--------------|
| H | 4.969189000  | 2.631597000  | 0.314307000  |
| H | 3.807367000  | -0.186893000 | 0.557490000  |
| H | 5.645506000  | -2.388111000 | -1.607206000 |
| H | 6.997543000  | -4.308787000 | -0.910379000 |
| H | 8.512813000  | -4.135064000 | 1.053099000  |
| H | 8.663259000  | -1.962554000 | 2.285808000  |
| N | 5.650207000  | 0.083975000  | -0.446605000 |
| N | 3.601605000  | 1.981655000  | -1.140642000 |
| H | 5.096534000  | 0.543784000  | 1.531616000  |
| H | 3.370606000  | 2.148085000  | 0.929595000  |
| H | 5.343481000  | 2.107648000  | -2.276627000 |
| H | 4.213251000  | -0.683801000 | -1.791832000 |
| F | 7.374397000  | 0.160752000  | 1.682351000  |
| C | 2.488771000  | 2.718401000  | -1.403287000 |
| C | 2.306602000  | 3.969924000  | -0.564526000 |
| C | 2.159297000  | 2.979865000  | -2.874737000 |
| C | 0.954604000  | 4.670381000  | -0.677548000 |
| H | 2.532007000  | 3.804512000  | 0.483113000  |
| C | 1.362084000  | 4.268817000  | -3.128202000 |
| H | 3.105075000  | 3.069820000  | -3.412839000 |
| C | 0.309978000  | 4.543941000  | -2.062853000 |
| H | 0.286455000  | 4.272609000  | 0.084476000  |
| H | 0.900118000  | 4.192324000  | -4.116444000 |
| H | -0.421592000 | 3.736985000  | -2.055435000 |
| H | 3.099119000  | 4.621793000  | -0.960660000 |
| H | 1.641236000  | 2.124573000  | -3.298372000 |
| H | 1.116769000  | 5.724860000  | -0.433123000 |
| H | -0.241828000 | 5.455689000  | -2.309223000 |
| H | 2.055448000  | 5.116187000  | -3.170655000 |

---

**TS<sub>C3-B1</sub>**

---

Coordinates (Angstroms)

---



|    | X            | Y            | Z            |
|----|--------------|--------------|--------------|
| C  | -3.473335000 | -0.785955000 | -3.250386000 |
| C  | -4.598324000 | 0.047988000  | -2.997213000 |
| H  | -4.732547000 | 1.059788000  | -3.351472000 |
| C  | -5.491436000 | -0.663691000 | -2.148900000 |
| H  | -6.419449000 | -0.283988000 | -1.746729000 |
| C  | -3.677506000 | -2.010463000 | -2.563450000 |
| H  | -2.999151000 | -2.847208000 | -2.560258000 |
| C  | -4.917299000 | -1.936166000 | -1.873339000 |
| H  | -5.340591000 | -2.702478000 | -1.240150000 |
| H  | -2.608294000 | -0.530644000 | -3.845035000 |
| C  | -2.062126000 | 0.663604000  | -0.563218000 |
| C  | -3.255292000 | 1.435656000  | -0.490327000 |
| C  | -4.172536000 | 0.771614000  | 0.360397000  |
| H  | -5.184396000 | 1.083520000  | 0.573370000  |
| C  | -2.221787000 | -0.480992000 | 0.302818000  |
| C  | -3.556306000 | -0.414610000 | 0.822524000  |
| H  | -4.022995000 | -1.132063000 | 1.476461000  |
| Fe | -3.678170000 | -0.417870000 | -1.230296000 |
| P  | -0.842864000 | -1.500552000 | 0.973540000  |
| H  | -3.453632000 | 2.348254000  | -1.030555000 |
| C  | -0.845828000 | 1.053500000  | -1.361613000 |
| H  | -0.404839000 | 0.153532000  | -1.792992000 |
| C  | -1.178411000 | 2.032231000  | -2.484210000 |
| H  | -1.880527000 | 1.560112000  | -3.174863000 |
| H  | -1.643715000 | 2.942781000  | -2.108863000 |
| H  | -0.289273000 | 2.314597000  | -3.048239000 |
| P  | 0.414537000  | 1.609555000  | -0.102405000 |
| Ir | 1.169421000  | -0.318176000 | 1.072288000  |
| Cl | 3.353540000  | 0.729178000  | 1.644636000  |
| H  | 0.621230000  | 0.235184000  | 2.400383000  |
| O  | 3.388495000  | -2.486747000 | 0.761421000  |

|   |              |              |              |
|---|--------------|--------------|--------------|
| C | 3.275523000  | -2.037140000 | -0.409219000 |
| C | 4.221147000  | -2.655231000 | -1.456161000 |
| O | 2.462318000  | -1.203755000 | -0.815025000 |
| F | 5.375707000  | -3.053351000 | -0.922086000 |
| F | 4.492947000  | -1.796171000 | -2.439547000 |
| F | 3.628849000  | -3.729821000 | -2.004214000 |
| H | 1.683041000  | -1.610301000 | 2.027326000  |
| C | 1.845534000  | 2.297266000  | -1.020667000 |
| C | 2.718383000  | 3.264417000  | -0.489863000 |
| C | 2.145007000  | 1.692092000  | -2.244775000 |
| C | 3.834212000  | 3.625162000  | -1.247582000 |
| C | 3.265837000  | 2.058747000  | -2.974592000 |
| H | 1.506776000  | 0.909870000  | -2.638307000 |
| C | 4.110489000  | 3.040906000  | -2.475907000 |
| H | 4.511933000  | 4.373975000  | -0.849191000 |
| H | 3.476267000  | 1.573873000  | -3.921181000 |
| H | 4.991932000  | 3.341698000  | -3.031950000 |
| C | -0.498806000 | 2.951131000  | 0.767084000  |
| C | -0.769062000 | 4.236652000  | 0.259555000  |
| C | -1.083615000 | 2.560921000  | 1.976415000  |
| C | -1.609457000 | 5.070424000  | 1.006085000  |
| C | -1.920479000 | 3.398707000  | 2.693414000  |
| H | -0.887308000 | 1.569793000  | 2.355391000  |
| C | -2.184444000 | 4.670114000  | 2.201252000  |
| H | -1.814007000 | 6.065659000  | 0.622793000  |
| H | -2.360749000 | 3.056900000  | 3.623421000  |
| H | -2.834381000 | 5.347658000  | 2.744344000  |
| C | -0.220716000 | 4.826885000  | -1.017095000 |
| H | 0.377831000  | 4.138409000  | -1.604687000 |
| H | -1.041981000 | 5.180590000  | -1.646068000 |
| H | 0.401710000  | 5.696309000  | -0.785116000 |
| C | 2.520562000  | 3.933746000  | 0.845073000  |

|   |              |              |              |
|---|--------------|--------------|--------------|
| H | 1.889322000  | 4.822423000  | 0.755446000  |
| H | 2.066759000  | 3.267841000  | 1.577792000  |
| H | 3.485330000  | 4.255013000  | 1.243054000  |
| C | -1.373382000 | -1.965893000 | 2.757888000  |
| C | -2.484834000 | -3.027985000 | 2.801873000  |
| H | -2.885063000 | -3.060384000 | 3.820070000  |
| H | -3.317352000 | -2.839518000 | 2.126201000  |
| H | -2.084057000 | -4.017710000 | 2.579996000  |
| C | -0.183455000 | -2.542489000 | 3.548194000  |
| H | 0.332233000  | -3.350935000 | 3.029056000  |
| H | 0.546640000  | -1.775191000 | 3.804259000  |
| H | -0.577532000 | -2.951019000 | 4.484831000  |
| C | -1.831368000 | -0.713700000 | 3.524844000  |
| H | -1.021599000 | 0.009147000  | 3.632383000  |
| H | -2.690729000 | -0.212231000 | 3.081316000  |
| H | -2.114790000 | -1.027004000 | 4.535051000  |
| C | -0.786012000 | -3.060299000 | -0.105262000 |
| C | -2.139246000 | -3.785542000 | -0.199547000 |
| H | -2.145580000 | -4.386794000 | -1.114475000 |
| H | -2.291342000 | -4.470498000 | 0.632048000  |
| H | -2.986496000 | -3.102519000 | -0.244718000 |
| C | 0.255910000  | -4.060455000 | 0.406024000  |
| H | 0.339294000  | -4.870714000 | -0.326867000 |
| H | 1.246472000  | -3.622460000 | 0.524770000  |
| H | -0.045291000 | -4.509605000 | 1.354168000  |
| C | -0.372749000 | -2.588269000 | -1.508421000 |
| H | 0.617413000  | -2.134648000 | -1.511055000 |
| H | -0.347832000 | -3.456896000 | -2.174843000 |
| H | -1.085664000 | -1.874884000 | -1.922169000 |
| H | 2.425910000  | -1.883345000 | 1.432849000  |

---

**D1**

---

| Coordinates (Angstroms) |              |              |              |
|-------------------------|--------------|--------------|--------------|
|                         | X            | Y            | Z            |
| C                       | -3.338451000 | 3.709297000  | -0.076207000 |
| C                       | -2.091003000 | 4.202163000  | 0.396884000  |
| H                       | -1.952162000 | 4.902105000  | 1.208249000  |
| C                       | -1.057152000 | 3.570265000  | -0.346834000 |
| C                       | -3.077715000 | 2.772315000  | -1.112272000 |
| H                       | -3.821110000 | 2.212682000  | -1.660805000 |
| C                       | -1.665382000 | 2.686110000  | -1.278637000 |
| H                       | -1.140815000 | 2.058465000  | -1.982401000 |
| H                       | -4.312201000 | 3.970850000  | 0.312376000  |
| C                       | -2.987948000 | 1.684366000  | 2.479274000  |
| C                       | -1.588552000 | 1.852745000  | 2.562891000  |
| C                       | -0.944580000 | 0.918937000  | 1.697760000  |
| C                       | -3.236800000 | 0.650087000  | 1.553585000  |
| H                       | -4.217517000 | 0.309048000  | 1.279665000  |
| C                       | -1.988234000 | 0.153946000  | 1.042062000  |
| H                       | -3.737524000 | 2.273532000  | 2.987359000  |
| Fe                      | -2.189111000 | 2.167473000  | 0.642929000  |
| C                       | 0.574225000  | 0.885414000  | 1.776817000  |
| H                       | 0.846522000  | 1.937973000  | 1.740940000  |
| P                       | -1.792293000 | -1.341250000 | 0.003641000  |
| C                       | -2.046955000 | -2.712213000 | 1.307300000  |
| C                       | -1.164688000 | -2.364759000 | 2.512000000  |
| H                       | -0.126438000 | -2.224911000 | 2.213176000  |
| H                       | -1.507550000 | -1.466440000 | 3.028190000  |
| H                       | -1.198665000 | -3.196553000 | 3.222855000  |
| C                       | -3.495776000 | -2.796689000 | 1.804956000  |
| H                       | -4.183449000 | -3.174256000 | 1.047918000  |
| H                       | -3.523172000 | -3.497564000 | 2.646256000  |
| H                       | -3.865398000 | -1.836337000 | 2.170474000  |
| C                       | -1.607390000 | -4.091511000 | 0.793853000  |

|   |              |              |              |
|---|--------------|--------------|--------------|
| H | -1.803228000 | -4.823797000 | 1.584600000  |
| H | -2.146998000 | -4.415296000 | -0.094458000 |
| H | -0.539836000 | -4.117198000 | 0.573275000  |
| C | -3.234271000 | -1.437292000 | -1.267498000 |
| C | -3.406398000 | -2.892366000 | -1.731805000 |
| H | -3.867203000 | -3.526078000 | -0.973702000 |
| H | -4.074405000 | -2.886772000 | -2.599635000 |
| H | -2.462342000 | -3.341608000 | -2.046040000 |
| C | -4.596439000 | -0.928183000 | -0.769649000 |
| H | -5.343974000 | -1.207219000 | -1.519421000 |
| H | -4.912619000 | -1.360530000 | 0.177698000  |
| H | -4.610341000 | 0.159283000  | -0.691947000 |
| C | -2.892277000 | -0.610173000 | -2.516541000 |
| H | -2.554697000 | 0.396585000  | -2.275936000 |
| H | -2.136122000 | -1.096388000 | -3.131661000 |
| H | -3.801970000 | -0.521178000 | -3.119019000 |
| H | 0.003862000  | 3.712418000  | -0.204301000 |
| C | 1.013627000  | 0.407501000  | 3.170034000  |
| H | 0.582785000  | 1.082195000  | 3.913855000  |
| H | 0.673051000  | -0.598995000 | 3.405208000  |
| H | 2.097078000  | 0.443839000  | 3.286525000  |
| P | 1.473464000  | 0.192993000  | 0.274192000  |
| C | 3.023958000  | -0.637073000 | 0.875318000  |
| C | 4.331994000  | -0.434425000 | 0.389350000  |
| C | 2.810254000  | -1.660320000 | 1.806336000  |
| C | 5.363310000  | -1.208592000 | 0.935916000  |
| C | 3.844116000  | -2.419203000 | 2.328975000  |
| H | 1.803372000  | -1.889252000 | 2.124451000  |
| C | 5.141823000  | -2.177454000 | 1.901137000  |
| H | 6.372060000  | -1.051650000 | 0.566771000  |
| H | 3.630855000  | -3.195827000 | 3.054908000  |
| H | 5.972176000  | -2.754553000 | 2.293469000  |

|    |              |              |              |
|----|--------------|--------------|--------------|
| C  | 1.986761000  | 1.788102000  | -0.514969000 |
| C  | 2.639201000  | 2.832258000  | 0.173590000  |
| C  | 1.678542000  | 1.963113000  | -1.864700000 |
| C  | 2.889839000  | 4.023663000  | -0.510058000 |
| C  | 1.944405000  | 3.150826000  | -2.530392000 |
| H  | 1.233579000  | 1.149901000  | -2.418086000 |
| C  | 2.539969000  | 4.197013000  | -1.841582000 |
| H  | 3.390415000  | 4.829067000  | 0.018743000  |
| H  | 1.687836000  | 3.252721000  | -3.578906000 |
| H  | 2.748815000  | 5.137736000  | -2.339448000 |
| C  | 3.139181000  | 2.743128000  | 1.594861000  |
| H  | 2.428471000  | 3.183357000  | 2.301824000  |
| H  | 3.334896000  | 1.719053000  | 1.910549000  |
| H  | 4.073009000  | 3.301643000  | 1.688820000  |
| C  | 4.723335000  | 0.516717000  | -0.713711000 |
| H  | 4.012246000  | 0.495411000  | -1.538285000 |
| H  | 4.800647000  | 1.547737000  | -0.360196000 |
| H  | 5.701088000  | 0.230435000  | -1.106666000 |
| Ir | 0.250243000  | -1.419149000 | -1.040227000 |
| H  | -0.401109000 | -2.682377000 | -1.810743000 |
| Cl | 2.399435000  | -1.935129000 | -2.284142000 |
| H  | -1.070717000 | 2.591317000  | 3.158744000  |
| H  | 0.677547000  | -2.475357000 | 0.047544000  |
| H  | -0.112209000 | -0.531463000 | -2.611737000 |
| H  | -0.353503000 | -0.010797000 | -2.025017000 |

---

**D2**

---

| Coordinates (Angstroms) |             |             |             |
|-------------------------|-------------|-------------|-------------|
|                         | X           | Y           | Z           |
| C                       | 2.499308000 | 1.385979000 | 3.942338000 |
| C                       | 1.256581000 | 0.905259000 | 4.440439000 |
| H                       | 0.732600000 | 1.282863000 | 5.306806000 |

---

|    |              |              |              |
|----|--------------|--------------|--------------|
| C  | 0.796591000  | -0.115494000 | 3.563563000  |
| C  | 2.808020000  | 0.662468000  | 2.758987000  |
| H  | 3.681964000  | 0.804838000  | 2.140712000  |
| C  | 1.753682000  | -0.265282000 | 2.523873000  |
| H  | 1.688463000  | -0.964300000 | 1.704301000  |
| H  | 3.084987000  | 2.188912000  | 4.366686000  |
| C  | 0.549776000  | 3.661805000  | 2.599724000  |
| C  | -0.616344000 | 2.867262000  | 2.664214000  |
| C  | -0.702185000 | 2.053769000  | 1.494886000  |
| C  | 1.212248000  | 3.347054000  | 1.395131000  |
| H  | 2.139189000  | 3.789981000  | 1.081451000  |
| C  | 0.463677000  | 2.347090000  | 0.684194000  |
| H  | 0.903908000  | 4.345641000  | 3.357387000  |
| Fe | 1.017244000  | 1.655740000  | 2.546080000  |
| C  | -1.977940000 | 1.238863000  | 1.343265000  |
| H  | -2.108065000 | 0.792978000  | 2.327171000  |
| P  | 0.800165000  | 1.799310000  | -1.028520000 |
| C  | 0.171327000  | 3.311364000  | -2.011897000 |
| C  | -1.215566000 | 3.672601000  | -1.465102000 |
| H  | -1.895878000 | 2.822539000  | -1.514429000 |
| H  | -1.173497000 | 4.032461000  | -0.435277000 |
| H  | -1.636225000 | 4.471523000  | -2.084436000 |
| C  | 1.070600000  | 4.543855000  | -1.846851000 |
| H  | 2.035520000  | 4.429642000  | -2.341181000 |
| H  | 0.566298000  | 5.397431000  | -2.312357000 |
| H  | 1.239696000  | 4.798340000  | -0.798753000 |
| C  | 0.010307000  | 3.007709000  | -3.509060000 |
| H  | -0.332030000 | 3.923149000  | -4.003771000 |
| H  | 0.936648000  | 2.700161000  | -3.991154000 |
| H  | -0.737352000 | 2.233742000  | -3.683798000 |
| C  | 2.698671000  | 1.649716000  | -1.295908000 |
| C  | 3.013638000  | 1.749416000  | -2.797627000 |

|    |              |              |              |
|----|--------------|--------------|--------------|
| H  | 2.920097000  | 2.764661000  | -3.184617000 |
| H  | 4.055049000  | 1.441646000  | -2.938955000 |
| H  | 2.390176000  | 1.081588000  | -3.395206000 |
| C  | 3.564770000  | 2.680682000  | -0.555455000 |
| H  | 4.589299000  | 2.571967000  | -0.926835000 |
| H  | 3.268397000  | 3.714277000  | -0.725844000 |
| H  | 3.590477000  | 2.485691000  | 0.516678000  |
| C  | 3.178424000  | 0.264576000  | -0.838377000 |
| H  | 2.824491000  | -0.001063000 | 0.155709000  |
| H  | 2.873333000  | -0.511971000 | -1.537777000 |
| H  | 4.271916000  | 0.279755000  | -0.812753000 |
| H  | -0.134182000 | -0.656205000 | 3.652989000  |
| H  | -4.450277000 | -3.843786000 | -0.419526000 |
| Ir | -0.273057000 | -0.150156000 | -1.566574000 |
| H  | 0.594791000  | -0.020995000 | -2.922974000 |
| Cl | -1.321763000 | -2.207047000 | -2.588302000 |
| H  | -1.326355000 | 2.842446000  | 3.478928000  |
| H  | -1.345001000 | 0.754268000  | -2.298775000 |
| H  | 0.967646000  | -1.407373000 | -1.201815000 |
| H  | 0.867033000  | -1.012900000 | -0.479459000 |
| C  | 2.950879000  | -3.154668000 | -0.523869000 |
| C  | 4.469294000  | -3.044108000 | -0.861913000 |
| O  | 2.219166000  | -3.409268000 | -1.492947000 |
| O  | 2.674499000  | -3.009638000 | 0.676158000  |
| F  | 4.699673000  | -2.551439000 | -2.090280000 |
| F  | 5.142365000  | -2.268134000 | 0.003413000  |
| F  | 5.044609000  | -4.264571000 | -0.818554000 |

---

**D3**

---

Coordinates (Angstroms)

|   | X           | Y           | Z           |
|---|-------------|-------------|-------------|
| C | 1.711668000 | 2.752908000 | 3.749087000 |

---



|    |              |              |              |
|----|--------------|--------------|--------------|
| C  | 0.573620000  | 2.066848000  | 4.257591000  |
| H  | -0.107252000 | 2.437604000  | 5.010383000  |
| C  | 0.457326000  | 0.832402000  | 3.561655000  |
| C  | 2.298737000  | 1.942427000  | 2.739024000  |
| H  | 3.166885000  | 2.196449000  | 2.148991000  |
| C  | 1.519714000  | 0.756571000  | 2.620645000  |
| H  | 1.677386000  | -0.045555000 | 1.916533000  |
| H  | 2.048365000  | 3.734590000  | 4.050609000  |
| C  | -0.574552000 | 4.201362000  | 1.863089000  |
| C  | -1.522116000 | 3.165291000  | 2.018245000  |
| C  | -1.288633000 | 2.157256000  | 1.034623000  |
| C  | 0.268411000  | 3.845887000  | 0.788982000  |
| H  | 1.093864000  | 4.443416000  | 0.451254000  |
| C  | -0.143040000 | 2.577347000  | 0.251960000  |
| H  | -0.474193000 | 5.079636000  | 2.484339000  |
| Fe | 0.353770000  | 2.404143000  | 2.246073000  |
| C  | -2.314181000 | 1.035809000  | 0.973046000  |
| H  | -2.438218000 | 0.750432000  | 2.015179000  |
| P  | 0.487716000  | 1.816097000  | -1.299149000 |
| C  | -0.364924000 | 2.963255000  | -2.584103000 |
| C  | -1.855112000 | 3.008609000  | -2.220651000 |
| H  | -2.280854000 | 2.006089000  | -2.173642000 |
| H  | -2.029887000 | 3.511672000  | -1.267767000 |
| H  | -2.390660000 | 3.564620000  | -2.997467000 |
| C  | 0.155861000  | 4.406430000  | -2.573114000 |
| H  | 1.171121000  | 4.492217000  | -2.961885000 |
| H  | -0.489191000 | 5.006043000  | -3.225304000 |
| H  | 0.118364000  | 4.858047000  | -1.580126000 |
| C  | -0.258504000 | 2.418714000  | -4.016512000 |
| H  | -0.834878000 | 3.079912000  | -4.673512000 |
| H  | 0.762602000  | 2.394909000  | -4.393649000 |
| H  | -0.678285000 | 1.416460000  | -4.099665000 |

|   |              |              |              |
|---|--------------|--------------|--------------|
| C | 2.390213000  | 2.138434000  | -1.419238000 |
| C | 2.823206000  | 2.066896000  | -2.892723000 |
| H | 2.542616000  | 2.956536000  | -3.457457000 |
| H | 3.916279000  | 1.997885000  | -2.918535000 |
| H | 2.427558000  | 1.183313000  | -3.397419000 |
| C | 2.889520000  | 3.475155000  | -0.846915000 |
| H | 3.940081000  | 3.585044000  | -1.136840000 |
| H | 2.360470000  | 4.348074000  | -1.224137000 |
| H | 2.857037000  | 3.479390000  | 0.242695000  |
| C | 3.167465000  | 1.039244000  | -0.678158000 |
| H | 2.772785000  | 0.839288000  | 0.314692000  |
| H | 3.174201000  | 0.109561000  | -1.241882000 |
| H | 4.206139000  | 1.371265000  | -0.571110000 |
| H | -0.321075000 | 0.096188000  | 3.698054000  |
| C | -3.675128000 | 1.611203000  | 0.551303000  |
| H | -3.952892000 | 2.395183000  | 1.260238000  |
| H | -3.658196000 | 2.057713000  | -0.441640000 |
| H | -4.457760000 | 0.852760000  | 0.578583000  |
| P | -1.733335000 | -0.569998000 | 0.168112000  |
| C | -3.241262000 | -1.385576000 | -0.568927000 |
| C | -3.667462000 | -2.717103000 | -0.381709000 |
| C | -3.922744000 | -0.600785000 | -1.507607000 |
| C | -4.807716000 | -3.149425000 | -1.071796000 |
| C | -5.046277000 | -1.048030000 | -2.182604000 |
| H | -3.553779000 | 0.388739000  | -1.735971000 |
| C | -5.507978000 | -2.335468000 | -1.946851000 |
| H | -5.138135000 | -4.172851000 | -0.922517000 |
| H | -5.545029000 | -0.397421000 | -2.892578000 |
| H | -6.386215000 | -2.714152000 | -2.458695000 |
| C | -1.364936000 | -1.520163000 | 1.722247000  |
| C | -2.266701000 | -1.661118000 | 2.798372000  |
| C | -0.102069000 | -2.103376000 | 1.824892000  |

|    |              |              |              |
|----|--------------|--------------|--------------|
| C  | -1.838048000 | -2.341907000 | 3.940049000  |
| C  | 0.304076000  | -2.784273000 | 2.963862000  |
| H  | 0.581625000  | -2.012725000 | 0.992269000  |
| C  | -0.568560000 | -2.894772000 | 4.036518000  |
| H  | -2.532381000 | -2.451989000 | 4.767794000  |
| H  | 1.297159000  | -3.217733000 | 3.007992000  |
| H  | -0.271479000 | -3.416584000 | 4.940055000  |
| C  | -3.692568000 | -1.163353000 | 2.804078000  |
| H  | -3.776931000 | -0.198211000 | 3.314510000  |
| H  | -4.110604000 | -1.049069000 | 1.805064000  |
| H  | -4.324568000 | -1.868460000 | 3.348947000  |
| C  | -2.974180000 | -3.752772000 | 0.468510000  |
| H  | -1.891508000 | -3.694322000 | 0.371354000  |
| H  | -3.225778000 | -3.653392000 | 1.527051000  |
| H  | -3.287652000 | -4.748999000 | 0.148687000  |
| Ir | -0.045857000 | -0.380316000 | -1.499155000 |
| H  | 1.042196000  | -0.359046000 | -2.707259000 |
| Cl | -0.366212000 | -2.871669000 | -1.988334000 |
| H  | -2.289576000 | 3.113443000  | 2.777843000  |
| H  | -1.211814000 | -0.071838000 | -2.635615000 |
| H  | 1.970997000  | -1.772003000 | -0.864136000 |
| H  | 1.148238000  | -0.726709000 | -0.389594000 |
| C  | 3.525309000  | -2.408797000 | 0.082424000  |
| C  | 4.856075000  | -3.136223000 | -0.207842000 |
| O  | 2.779985000  | -2.385270000 | -0.980012000 |
| O  | 3.306903000  | -1.934424000 | 1.167420000  |
| F  | 5.605465000  | -2.401036000 | -1.041269000 |
| F  | 5.548820000  | -3.325428000 | 0.911132000  |
| F  | 4.652774000  | -4.325517000 | -0.781910000 |

---

**D4**

---

Coordinates (Angstroms)

---

|    | X            | Y            | Z            |
|----|--------------|--------------|--------------|
| C  | -3.294488000 | 3.750070000  | -0.055675000 |
| C  | -2.036295000 | 4.222136000  | 0.410857000  |
| H  | -1.881820000 | 4.921417000  | 1.220114000  |
| C  | -1.017191000 | 3.571084000  | -0.336900000 |
| C  | -3.054217000 | 2.807455000  | -1.092201000 |
| H  | -3.809303000 | 2.258984000  | -1.635704000 |
| C  | -1.644612000 | 2.694994000  | -1.264175000 |
| H  | -1.133465000 | 2.040750000  | -1.953469000 |
| H  | -4.261933000 | 4.030512000  | 0.335826000  |
| C  | -2.965323000 | 1.693065000  | 2.485818000  |
| C  | -1.563898000 | 1.847279000  | 2.570406000  |
| C  | -0.931102000 | 0.914051000  | 1.694816000  |
| C  | -3.222264000 | 0.670740000  | 1.547435000  |
| H  | -4.206815000 | 0.345847000  | 1.268413000  |
| C  | -1.978915000 | 0.165157000  | 1.032055000  |
| H  | -3.709840000 | 2.282975000  | 3.000838000  |
| Fe | -2.166304000 | 2.188734000  | 0.657266000  |
| C  | 0.586892000  | 0.853283000  | 1.770267000  |
| H  | 0.881220000  | 1.899907000  | 1.738903000  |
| P  | -1.778660000 | -1.328961000 | -0.021896000 |
| C  | -2.129157000 | -2.688763000 | 1.292620000  |
| C  | -1.225558000 | -2.391316000 | 2.496492000  |
| H  | -0.178790000 | -2.327181000 | 2.196234000  |
| H  | -1.505815000 | -1.465949000 | 3.003356000  |
| H  | -1.317638000 | -3.209989000 | 3.218327000  |
| C  | -3.578355000 | -2.714072000 | 1.795074000  |
| H  | -4.280606000 | -3.059696000 | 1.035659000  |
| H  | -3.636364000 | -3.419654000 | 2.631684000  |
| H  | -3.910714000 | -1.743271000 | 2.167668000  |
| C  | -1.766871000 | -4.093036000 | 0.785505000  |
| H  | -1.944003000 | -4.805106000 | 1.599602000  |

|   |              |              |              |
|---|--------------|--------------|--------------|
| H | -2.368800000 | -4.412459000 | -0.063723000 |
| H | -0.716062000 | -4.158608000 | 0.504313000  |
| C | -3.234740000 | -1.380131000 | -1.294658000 |
| C | -3.447588000 | -2.827632000 | -1.766930000 |
| H | -3.955103000 | -3.441945000 | -1.022104000 |
| H | -4.089382000 | -2.800690000 | -2.654500000 |
| H | -2.512142000 | -3.312632000 | -2.052138000 |
| C | -4.589047000 | -0.845401000 | -0.799465000 |
| H | -5.339884000 | -1.101792000 | -1.554726000 |
| H | -4.921410000 | -1.277284000 | 0.142254000  |
| H | -4.580974000 | 0.241313000  | -0.712706000 |
| C | -2.884955000 | -0.553484000 | -2.541731000 |
| H | -2.542537000 | 0.449200000  | -2.294441000 |
| H | -2.116388000 | -1.033736000 | -3.144772000 |
| H | -3.791716000 | -0.463270000 | -3.150531000 |
| H | 0.046933000  | 3.691818000  | -0.198533000 |
| C | 1.006308000  | 0.360232000  | 3.164025000  |
| H | 0.568309000  | 1.025764000  | 3.912096000  |
| H | 0.658600000  | -0.649067000 | 3.379197000  |
| H | 2.088572000  | 0.390592000  | 3.294171000  |
| P | 1.460213000  | 0.126334000  | 0.261343000  |
| C | 3.055796000  | -0.627270000 | 0.874023000  |
| C | 4.354172000  | -0.401336000 | 0.371156000  |
| C | 2.889133000  | -1.619001000 | 1.849105000  |
| C | 5.418104000  | -1.110794000 | 0.944679000  |
| C | 3.953709000  | -2.311435000 | 2.401513000  |
| H | 1.891587000  | -1.874879000 | 2.177221000  |
| C | 5.240134000  | -2.040234000 | 1.956015000  |
| H | 6.417743000  | -0.933789000 | 0.559430000  |
| H | 3.773776000  | -3.063369000 | 3.161982000  |
| H | 6.094295000  | -2.565189000 | 2.370207000  |
| C | 1.951712000  | 1.730473000  | -0.541606000 |

|    |              |              |              |
|----|--------------|--------------|--------------|
| C  | 2.628581000  | 2.776863000  | 0.119479000  |
| C  | 1.594801000  | 1.901652000  | -1.879364000 |
| C  | 2.872269000  | 3.959967000  | -0.581618000 |
| C  | 1.853514000  | 3.080942000  | -2.563590000 |
| H  | 1.094072000  | 1.085914000  | -2.386242000 |
| C  | 2.487174000  | 4.124689000  | -1.904784000 |
| H  | 3.391650000  | 4.766944000  | -0.073146000 |
| H  | 1.556708000  | 3.181370000  | -3.601975000 |
| H  | 2.691700000  | 5.059046000  | -2.416811000 |
| C  | 3.152256000  | 2.710193000  | 1.534611000  |
| H  | 2.469223000  | 3.201514000  | 2.235582000  |
| H  | 3.312749000  | 1.691801000  | 1.884534000  |
| H  | 4.107657000  | 3.236435000  | 1.597447000  |
| C  | 4.709866000  | 0.512045000  | -0.776168000 |
| H  | 3.969792000  | 0.469559000  | -1.572903000 |
| H  | 4.808691000  | 1.553056000  | -0.458277000 |
| H  | 5.671176000  | 0.205007000  | -1.194293000 |
| Ir | 0.254571000  | -1.478596000 | -1.005024000 |
| H  | -0.455145000 | -2.629169000 | -1.906039000 |
| Cl | 2.382314000  | -1.838774000 | -2.418260000 |
| H  | -1.038213000 | 2.573736000  | 3.174375000  |
| H  | 0.793539000  | -2.691271000 | 0.013724000  |
| H  | -0.222902000 | -0.374869000 | -2.141969000 |

---

**TS<sub>D2-D3</sub>**

| Coordinates (Angstroms) |             |             |             |
|-------------------------|-------------|-------------|-------------|
|                         | X           | Y           | Z           |
| C                       | 1.973647000 | 2.537767000 | 3.754499000 |
| C                       | 0.784934000 | 1.945907000 | 4.264777000 |
| H                       | 0.143216000 | 2.366754000 | 5.025657000 |
| C                       | 0.556583000 | 0.735352000 | 3.555046000 |
| C                       | 2.480593000 | 1.692174000 | 2.730153000 |

---

|    |              |              |              |
|----|--------------|--------------|--------------|
| H  | 3.364541000  | 1.876568000  | 2.137836000  |
| C  | 1.601032000  | 0.579543000  | 2.603457000  |
| H  | 1.694212000  | -0.233793000 | 1.900222000  |
| H  | 2.396447000  | 3.483056000  | 4.063792000  |
| C  | -0.200679000 | 4.198458000  | 1.914007000  |
| C  | -1.229014000 | 3.242135000  | 2.066728000  |
| C  | -1.091795000 | 2.233350000  | 1.065599000  |
| C  | 0.597065000  | 3.791975000  | 0.823489000  |
| H  | 1.465080000  | 4.323554000  | 0.481720000  |
| C  | 0.075053000  | 2.570344000  | 0.273966000  |
| H  | -0.018990000 | 5.053788000  | 2.548613000  |
| Fe | 0.578478000  | 2.324386000  | 2.258294000  |
| C  | -2.208599000 | 1.202095000  | 1.004428000  |
| H  | -2.347067000 | 0.921734000  | 2.046400000  |
| P  | 0.629991000  | 1.777522000  | -1.287109000 |
| C  | -0.145926000 | 2.979755000  | -2.561420000 |
| C  | -1.619338000 | 3.162443000  | -2.175503000 |
| H  | -2.132749000 | 2.202975000  | -2.111470000 |
| H  | -1.734133000 | 3.690061000  | -1.226611000 |
| H  | -2.114377000 | 3.754704000  | -2.952262000 |
| C  | 0.505659000  | 4.369230000  | -2.563047000 |
| H  | 1.512483000  | 4.361823000  | -2.981416000 |
| H  | -0.101238000 | 5.028488000  | -3.193574000 |
| H  | 0.540815000  | 4.816920000  | -1.568082000 |
| C  | -0.115173000 | 2.420043000  | -3.991921000 |
| H  | -0.578666000 | 3.160285000  | -4.653887000 |
| H  | 0.890931000  | 2.234413000  | -4.363829000 |
| H  | -0.685221000 | 1.494457000  | -4.074021000 |
| C  | 2.547759000  | 1.943253000  | -1.426982000 |
| C  | 2.959999000  | 1.839669000  | -2.904562000 |
| H  | 2.741792000  | 2.747661000  | -3.467793000 |
| H  | 4.044250000  | 1.688143000  | -2.938791000 |

|   |              |              |              |
|---|--------------|--------------|--------------|
| H | 2.494303000  | 0.988256000  | -3.404513000 |
| C | 3.163949000  | 3.228561000  | -0.852621000 |
| H | 4.216218000  | 3.251477000  | -1.156337000 |
| H | 2.705513000  | 4.146032000  | -1.217204000 |
| H | 3.147585000  | 3.227247000  | 0.237415000  |
| C | 3.225243000  | 0.773839000  | -0.699282000 |
| H | 2.838092000  | 0.622622000  | 0.305452000  |
| H | 3.115334000  | -0.153727000 | -1.255648000 |
| H | 4.295745000  | 0.993559000  | -0.621458000 |
| H | -0.284044000 | 0.070839000  | 3.688186000  |
| C | -3.520641000 | 1.889536000  | 0.595724000  |
| H | -3.723364000 | 2.695432000  | 1.305480000  |
| H | -3.478544000 | 2.331817000  | -0.398163000 |
| H | -4.364026000 | 1.199467000  | 0.633702000  |
| P | -1.773035000 | -0.443529000 | 0.190497000  |
| C | -3.338858000 | -1.112893000 | -0.568761000 |
| C | -3.884464000 | -2.401893000 | -0.393732000 |
| C | -3.929031000 | -0.268244000 | -1.516776000 |
| C | -5.045467000 | -2.729526000 | -1.106099000 |
| C | -5.072929000 | -0.614180000 | -2.216943000 |
| H | -3.470747000 | 0.685670000  | -1.734035000 |
| C | -5.651392000 | -1.855783000 | -1.994134000 |
| H | -5.468828000 | -3.719552000 | -0.967384000 |
| H | -5.495563000 | 0.077557000  | -2.937286000 |
| H | -6.547591000 | -2.155304000 | -2.526827000 |
| C | -1.485451000 | -1.439430000 | 1.731387000  |
| C | -2.387622000 | -1.500161000 | 2.814381000  |
| C | -0.285197000 | -2.145185000 | 1.817740000  |
| C | -2.014798000 | -2.222431000 | 3.950132000  |
| C | 0.065106000  | -2.865510000 | 2.950623000  |
| H | 0.395004000  | -2.128090000 | 0.979286000  |
| C | -0.802229000 | -2.893061000 | 4.032570000  |



|    |              |              |              |
|----|--------------|--------------|--------------|
| H  | -2.708244000 | -2.269956000 | 4.784490000  |
| H  | 1.011641000  | -3.393712000 | 2.980490000  |
| H  | -0.547728000 | -3.443241000 | 4.932216000  |
| C  | -3.763363000 | -0.877712000 | 2.826604000  |
| H  | -3.765246000 | 0.081477000  | 3.354631000  |
| H  | -4.164322000 | -0.710382000 | 1.828144000  |
| H  | -4.457351000 | -1.535443000 | 3.355022000  |
| C  | -3.296759000 | -3.498623000 | 0.459578000  |
| H  | -2.214326000 | -3.555001000 | 0.352685000  |
| H  | -3.526971000 | -3.368739000 | 1.519467000  |
| H  | -3.715229000 | -4.458517000 | 0.149295000  |
| Ir | -0.071418000 | -0.379669000 | -1.490724000 |
| H  | 0.963376000  | -0.408818000 | -2.735186000 |
| Cl | -0.650613000 | -2.793914000 | -2.047671000 |
| H  | -1.988522000 | 3.240530000  | 2.836021000  |
| H  | -1.184073000 | 0.098405000  | -2.560947000 |
| H  | 1.637471000  | -1.651211000 | -0.720066000 |
| H  | 1.091061000  | -0.854922000 | -0.319795000 |
| C  | 3.280471000  | -2.618548000 | 0.103564000  |
| C  | 4.556017000  | -3.404269000 | -0.286600000 |
| O  | 2.485205000  | -2.497071000 | -0.885504000 |
| O  | 3.170742000  | -2.196033000 | 1.239195000  |
| F  | 5.281044000  | -2.702044000 | -1.173508000 |
| F  | 5.333886000  | -3.648373000 | 0.768192000  |
| F  | 4.254292000  | -4.579723000 | -0.854673000 |

---

**TS<sub>D4-B1</sub>**

---

| Coordinates (Angstroms) |             |              |              |
|-------------------------|-------------|--------------|--------------|
|                         | X           | Y            | Z            |
| C                       | 5.915763000 | -1.420915000 | -1.793696000 |
| C                       | 5.962243000 | -0.012626000 | -1.597662000 |
| H                       | 6.451576000 | 0.701548000  | -2.244347000 |

---

---

|    |              |              |              |
|----|--------------|--------------|--------------|
| C  | 5.207557000  | 0.295139000  | -0.432801000 |
| C  | 5.131640000  | -1.984284000 | -0.750190000 |
| H  | 4.894756000  | -3.031106000 | -0.630154000 |
| C  | 4.691013000  | -0.921635000 | 0.089106000  |
| H  | 4.050744000  | -1.008291000 | 0.953680000  |
| H  | 6.365575000  | -1.962016000 | -2.613783000 |
| C  | 3.443734000  | -0.643013000 | -3.804830000 |
| C  | 3.221296000  | 0.624893000  | -3.224231000 |
| C  | 2.316252000  | 0.485081000  | -2.130765000 |
| C  | 2.694439000  | -1.584653000 | -3.067752000 |
| H  | 2.683203000  | -2.636097000 | -3.279363000 |
| C  | 1.985234000  | -0.913764000 | -2.010599000 |
| H  | 4.110579000  | -0.868068000 | -4.624564000 |
| Fe | 4.020727000  | -0.629130000 | -1.829770000 |
| C  | 1.831172000  | 1.759146000  | -1.478178000 |
| H  | 2.746015000  | 2.321652000  | -1.312278000 |
| P  | 0.675618000  | -1.667555000 | -0.968058000 |
| C  | -0.720662000 | -1.788014000 | -2.280708000 |
| C  | -0.866959000 | -0.400798000 | -2.919142000 |
| H  | -1.067982000 | 0.359205000  | -2.165005000 |
| H  | 0.017463000  | -0.112739000 | -3.490037000 |
| H  | -1.718490000 | -0.421052000 | -3.606859000 |
| C  | -0.457643000 | -2.789647000 | -3.411587000 |
| H  | -0.475807000 | -3.826230000 | -3.074248000 |
| H  | -1.257217000 | -2.679458000 | -4.152869000 |
| H  | 0.487368000  | -2.603561000 | -3.925315000 |
| C  | -2.059522000 | -2.121575000 | -1.616842000 |
| H  | -2.860253000 | -1.985795000 | -2.352260000 |
| H  | -2.111062000 | -3.149949000 | -1.262117000 |
| H  | -2.253093000 | -1.453068000 | -0.779800000 |
| C  | 1.233515000  | -3.469137000 | -0.559680000 |
| C  | -0.029149000 | -4.284642000 | -0.263967000 |

|   |              |              |              |
|---|--------------|--------------|--------------|
| H | -0.539311000 | -4.602374000 | -1.173601000 |
| H | 0.252824000  | -5.186804000 | 0.288388000  |
| H | -0.726106000 | -3.720987000 | 0.346860000  |
| C | 2.030897000  | -4.223619000 | -1.634942000 |
| H | 2.099253000  | -5.267580000 | -1.309496000 |
| H | 1.559441000  | -4.225353000 | -2.615660000 |
| H | 3.050438000  | -3.849093000 | -1.723316000 |
| C | 2.110101000  | -3.479725000 | 0.700230000  |
| H | 2.951027000  | -2.793914000 | 0.617951000  |
| H | 1.552008000  | -3.214458000 | 1.595248000  |
| H | 2.507571000  | -4.492672000 | 0.828559000  |
| H | 5.030632000  | 1.282468000  | -0.033748000 |
| C | 1.025259000  | 2.590778000  | -2.488195000 |
| H | 1.648041000  | 2.754666000  | -3.370899000 |
| H | 0.112203000  | 2.098029000  | -2.816126000 |
| H | 0.766042000  | 3.569423000  | -2.084106000 |
| P | 1.155855000  | 1.581005000  | 0.266091000  |
| C | -0.085406000 | 2.972184000  | 0.456310000  |
| C | -0.098048000 | 4.006949000  | 1.414606000  |
| C | -1.164152000 | 2.885004000  | -0.432676000 |
| C | -1.155404000 | 4.927334000  | 1.377694000  |
| C | -2.201567000 | 3.800581000  | -0.449299000 |
| H | -1.210225000 | 2.059655000  | -1.126643000 |
| C | -2.190334000 | 4.847431000  | 0.461704000  |
| H | -1.164471000 | 5.721894000  | 2.117582000  |
| H | -3.010286000 | 3.684683000  | -1.161563000 |
| H | -2.988694000 | 5.581723000  | 0.475509000  |
| C | 2.684477000  | 2.095263000  | 1.190864000  |
| C | 3.421581000  | 3.265889000  | 0.908638000  |
| C | 3.133775000  | 1.241989000  | 2.198371000  |
| C | 4.590912000  | 3.502666000  | 1.634791000  |
| C | 4.296577000  | 1.497538000  | 2.911005000  |

|    |              |              |              |
|----|--------------|--------------|--------------|
| H  | 2.554101000  | 0.354378000  | 2.417183000  |
| C  | 5.036539000  | 2.634346000  | 2.620909000  |
| H  | 5.156609000  | 4.405105000  | 1.423252000  |
| H  | 4.619536000  | 0.807687000  | 3.682993000  |
| H  | 5.951468000  | 2.852067000  | 3.161705000  |
| C  | 3.038533000  | 4.323454000  | -0.100929000 |
| H  | 3.570493000  | 4.182136000  | -1.047502000 |
| H  | 1.972009000  | 4.349627000  | -0.318978000 |
| H  | 3.321369000  | 5.307629000  | 0.279137000  |
| C  | 0.905259000  | 4.216599000  | 2.522028000  |
| H  | 1.314600000  | 3.283256000  | 2.897156000  |
| H  | 1.733736000  | 4.852515000  | 2.198211000  |
| H  | 0.414958000  | 4.726991000  | 3.354362000  |
| Ir | 0.111405000  | -0.404179000 | 0.893002000  |
| H  | -1.115325000 | -1.589555000 | 1.573737000  |
| Cl | -0.264432000 | 0.969889000  | 2.984991000  |
| H  | 3.675402000  | 1.556854000  | -3.530191000 |
| H  | -1.212797000 | 0.223777000  | 0.149215000  |
| H  | 1.380623000  | -1.086173000 | 1.736004000  |
| C  | -7.290663000 | 0.376298000  | -1.283479000 |
| C  | -8.095819000 | 1.088586000  | -2.166484000 |
| C  | -7.540828000 | 1.983990000  | -3.069982000 |
| C  | -6.158454000 | 2.146383000  | -3.099311000 |
| C  | -5.375473000 | 1.414612000  | -2.234463000 |
| C  | -5.896703000 | 0.522639000  | -1.285359000 |
| H  | -7.754109000 | -0.296096000 | -0.572303000 |
| H  | -9.170297000 | 0.946475000  | -2.130765000 |
| H  | -8.167071000 | 2.549089000  | -3.749982000 |
| H  | -5.677063000 | 2.815967000  | -3.802982000 |
| C  | -4.443617000 | -2.189701000 | 0.790591000  |
| C  | -5.580587000 | -1.304963000 | 0.307838000  |
| N  | -5.048310000 | -0.177789000 | -0.435236000 |

|   |              |              |              |
|---|--------------|--------------|--------------|
| C | -4.013921000 | 0.591579000  | 0.275961000  |
| C | -3.727865000 | 0.020219000  | 1.659097000  |
| N | -3.493272000 | -1.418632000 | 1.599081000  |
| H | -4.872580000 | -2.992472000 | 1.396595000  |
| H | -6.200358000 | -1.912120000 | -0.354268000 |
| H | -3.088013000 | 0.599643000  | -0.299128000 |
| H | -2.826916000 | 0.511028000  | 2.025164000  |
| C | -1.224516000 | -4.123954000 | 2.927826000  |
| C | -2.417323000 | -3.510492000 | 2.198998000  |
| C | -2.480590000 | -2.000017000 | 2.279541000  |
| C | -2.221575000 | -1.476799000 | 3.679859000  |
| C | -1.035019000 | -2.115745000 | 4.387679000  |
| C | -1.124273000 | -3.637494000 | 4.369267000  |
| H | -1.314190000 | -5.213126000 | 2.883242000  |
| H | -2.468863000 | -3.847453000 | 1.163639000  |
| H | -2.125207000 | -0.396310000 | 3.692678000  |
| H | -0.113374000 | -1.791852000 | 3.894753000  |
| H | -2.003945000 | -3.966287000 | 4.937301000  |
| H | -3.337966000 | -3.864652000 | 2.682753000  |
| H | -3.146003000 | -1.731526000 | 4.218365000  |
| H | -0.998921000 | -1.738114000 | 5.414059000  |
| H | -0.246114000 | -4.077615000 | 4.851137000  |
| H | -0.302484000 | -3.854870000 | 2.408630000  |
| F | -4.027688000 | 1.544782000  | -2.331208000 |
| H | -6.210841000 | -0.996048000 | 1.155159000  |
| H | -3.951136000 | -2.644404000 | -0.070053000 |
| H | -4.544572000 | 0.244820000  | 2.353640000  |
| H | -4.334250000 | 1.630431000  | 0.410985000  |

---

**E1**


---

Coordinates (Angstroms)

| X | Y | Z |
|---|---|---|
|---|---|---|

---

---

|   |              |              |              |
|---|--------------|--------------|--------------|
| P | 1.872872000  | -0.530238000 | -0.236895000 |
| P | -1.887584000 | -0.091072000 | -0.106449000 |
| O | 0.292950000  | 1.822716000  | 0.244761000  |
| C | 0.602381000  | 4.531918000  | -0.218548000 |
| C | 1.642618000  | 3.532816000  | -0.722025000 |
| C | -0.758897000 | 3.861650000  | -0.395334000 |
| C | 1.429291000  | 2.192891000  | -0.423457000 |
| C | -0.834103000 | 2.493723000  | -0.151423000 |
| C | 0.843831000  | 4.769032000  | 1.289737000  |
| C | 0.685834000  | 5.867717000  | -0.954867000 |
| C | 2.310010000  | 1.173223000  | -0.752020000 |
| C | -1.988049000 | 1.737858000  | -0.300284000 |
| C | 2.808987000  | 3.846481000  | -1.412289000 |
| C | -1.935802000 | 4.504483000  | -0.760138000 |
| C | 3.479041000  | 1.523257000  | -1.427682000 |
| C | -3.156231000 | 2.421390000  | -0.647626000 |
| C | 3.716759000  | 2.850825000  | -1.760237000 |
| C | -3.126077000 | 3.791552000  | -0.867034000 |
| C | 1.923453000  | -0.467130000 | 1.593900000  |
| C | 3.408478000  | -1.424962000 | -0.695603000 |
| C | -3.532123000 | -0.553630000 | -0.763376000 |
| C | -2.006206000 | -0.353452000 | 1.706427000  |
| C | 2.421003000  | 0.611146000  | 2.322732000  |
| C | 4.473101000  | -1.534823000 | 0.197230000  |
| C | -4.661417000 | -0.707215000 | 0.037189000  |
| C | -2.247931000 | -1.655381000 | 2.159352000  |
| C | 1.404725000  | -1.573968000 | 2.270719000  |
| C | 3.537413000  | -1.948738000 | -1.983716000 |
| C | -3.650579000 | -0.676249000 | -2.149146000 |
| C | -1.755129000 | 0.654287000  | 2.635963000  |
| C | 2.390636000  | 0.584262000  | 3.712938000  |
| C | 5.647508000  | -2.172885000 | -0.189284000 |

|   |              |              |              |
|---|--------------|--------------|--------------|
| C | -5.895803000 | -0.985492000 | -0.542401000 |
| C | -2.262412000 | -1.934963000 | 3.518417000  |
| C | 1.383578000  | -1.601962000 | 3.658074000  |
| C | 4.715197000  | -2.573450000 | -2.371219000 |
| C | -4.884229000 | -0.940754000 | -2.726447000 |
| C | -1.753787000 | 0.365968000  | 3.997332000  |
| C | 1.872410000  | -0.518837000 | 4.381085000  |
| C | 5.771270000  | -2.690959000 | -1.472178000 |
| C | -6.009717000 | -1.099581000 | -1.922348000 |
| C | -2.012033000 | -0.924532000 | 4.441550000  |
| H | 0.089308000  | 5.456013000  | 1.683434000  |
| H | 0.790549000  | 3.836940000  | 1.858272000  |
| H | 1.832179000  | 5.211130000  | 1.444748000  |
| H | 1.665328000  | 6.326690000  | -0.802451000 |
| H | 0.521107000  | 5.747330000  | -2.029105000 |
| H | -0.057116000 | 6.567135000  | -0.565327000 |
| H | 3.024066000  | 4.875131000  | -1.675327000 |
| H | -1.935558000 | 5.569539000  | -0.958327000 |
| H | 4.202339000  | 0.765719000  | -1.702459000 |
| H | -4.089609000 | 1.885793000  | -0.766706000 |
| H | 4.623554000  | 3.113853000  | -2.292534000 |
| H | -4.039009000 | 4.308927000  | -1.138804000 |
| H | 2.835048000  | 1.475778000  | 1.815731000  |
| H | 4.393522000  | -1.126188000 | 1.198206000  |
| H | -4.588796000 | -0.601620000 | 1.113683000  |
| H | -2.432511000 | -2.451376000 | 1.444528000  |
| H | 1.016651000  | -2.419018000 | 1.708483000  |
| H | 2.714639000  | -1.870223000 | -2.685883000 |
| H | -2.773210000 | -0.564963000 | -2.778080000 |
| H | -1.564558000 | 1.671169000  | 2.311948000  |
| H | 2.774320000  | 1.429685000  | 4.273217000  |
| H | 6.465310000  | -2.262600000 | 0.517217000  |

|    |              |              |              |
|----|--------------|--------------|--------------|
| H  | -6.769846000 | -1.105560000 | 0.088353000  |
| H  | -2.460609000 | -2.946357000 | 3.856025000  |
| H  | 0.975266000  | -2.464319000 | 4.172479000  |
| H  | 4.806303000  | -2.975792000 | -3.374115000 |
| H  | -4.967984000 | -1.032173000 | -3.803792000 |
| H  | -1.552405000 | 1.157023000  | 4.711249000  |
| H  | 1.846897000  | -0.534838000 | 5.465217000  |
| H  | 6.687405000  | -3.187787000 | -1.772286000 |
| H  | -6.973212000 | -1.311072000 | -2.373233000 |
| H  | -2.012439000 | -1.144342000 | 5.503533000  |
| Ir | -0.036717000 | -1.621500000 | -0.795883000 |
| H  | 0.090703000  | -1.135616000 | -2.255175000 |
| Cl | -1.729775000 | -3.397307000 | -1.200759000 |
| H  | 0.990874000  | -2.769470000 | -1.188513000 |

---

## E2

| Coordinates (Angstroms) |              |              |              |
|-------------------------|--------------|--------------|--------------|
|                         | X            | Y            | Z            |
| P                       | -1.722377000 | -0.264514000 | 0.046852000  |
| P                       | 1.783790000  | -0.325611000 | -0.102561000 |
| O                       | 0.067405000  | 1.908275000  | -1.012147000 |
| C                       | 0.101348000  | 4.617563000  | -0.645183000 |
| C                       | -1.152016000 | 3.802956000  | -0.298646000 |
| C                       | 1.305919000  | 3.763854000  | -0.226688000 |
| C                       | -1.076699000 | 2.426112000  | -0.484913000 |
| C                       | 1.199712000  | 2.390980000  | -0.428575000 |
| C                       | 0.150595000  | 4.835418000  | -2.173372000 |
| C                       | 0.103194000  | 5.974787000  | 0.056497000  |
| C                       | -2.064020000 | 1.530448000  | -0.110702000 |
| C                       | 2.145826000  | 1.465298000  | -0.027555000 |
| C                       | -2.348549000 | 4.301256000  | 0.200123000  |
| C                       | 2.488822000  | 4.219471000  | 0.339213000  |



|   |              |              |              |
|---|--------------|--------------|--------------|
| C | -3.265450000 | 2.067217000  | 0.366728000  |
| C | 3.337395000  | 1.957650000  | 0.515089000  |
| C | -3.404628000 | 3.440400000  | 0.499504000  |
| C | 3.504084000  | 3.323520000  | 0.680882000  |
| C | -3.383031000 | -0.960518000 | -0.283274000 |
| C | -1.443899000 | -0.515819000 | 1.832564000  |
| C | 2.097425000  | -0.920693000 | 1.593340000  |
| C | 3.165525000  | -1.013651000 | -1.087275000 |
| C | -3.999654000 | -1.854470000 | 0.587345000  |
| C | -1.107356000 | -1.806454000 | 2.255036000  |
| C | 2.344476000  | -2.284765000 | 1.772173000  |
| C | 2.937723000  | -1.294711000 | -2.436000000 |
| C | -4.037702000 | -0.574816000 | -1.456140000 |
| C | -1.572770000 | 0.504439000  | 2.772674000  |
| C | 2.040994000  | -0.079014000 | 2.702134000  |
| C | 4.428872000  | -1.244971000 | -0.538336000 |
| C | -5.258843000 | -2.364137000 | 0.284285000  |
| C | -0.947347000 | -2.078759000 | 3.604504000  |
| C | 2.566758000  | -2.791859000 | 3.044043000  |
| C | 3.961251000  | -1.801734000 | -3.228301000 |
| C | -5.294465000 | -1.079205000 | -1.750336000 |
| C | -1.396213000 | 0.228389000  | 4.124228000  |
| C | 2.260987000  | -0.593624000 | 3.974836000  |
| C | 5.449730000  | -1.745412000 | -1.334971000 |
| C | -5.906332000 | -1.979276000 | -0.881419000 |
| C | -1.095598000 | -1.061225000 | 4.541718000  |
| C | 2.531959000  | -1.944708000 | 4.147224000  |
| C | 5.217473000  | -2.025016000 | -2.678304000 |
| H | 1.057602000  | 5.384283000  | -2.441481000 |
| H | 0.148188000  | 3.887993000  | -2.717430000 |
| H | -0.717548000 | 5.418266000  | -2.493494000 |
| H | -0.754999000 | 6.570910000  | -0.261498000 |

|    |              |              |              |
|----|--------------|--------------|--------------|
| H  | 0.067950000  | 5.866717000  | 1.144077000  |
| H  | 0.999774000  | 6.539682000  | -0.208622000 |
| H  | -2.474033000 | 5.365104000  | 0.362168000  |
| H  | 2.637524000  | 5.277147000  | 0.521166000  |
| H  | -4.075631000 | 1.413751000  | 0.667933000  |
| H  | 4.116753000  | 1.276623000  | 0.837086000  |
| H  | -4.336131000 | 3.847687000  | 0.874439000  |
| H  | 4.425740000  | 3.700859000  | 1.108036000  |
| H  | -3.517635000 | -2.157107000 | 1.508532000  |
| H  | -0.979174000 | -2.602778000 | 1.528270000  |
| H  | 2.374848000  | -2.953076000 | 0.917652000  |
| H  | 1.958285000  | -1.111164000 | -2.870218000 |
| H  | -3.566205000 | 0.120650000  | -2.142182000 |
| H  | -1.807229000 | 1.516047000  | 2.465134000  |
| H  | 1.827827000  | 0.976942000  | 2.583533000  |
| H  | 4.617866000  | -1.041640000 | 0.509620000  |
| H  | -5.732587000 | -3.058663000 | 0.968925000  |
| H  | -0.695856000 | -3.083522000 | 3.923644000  |
| H  | 2.766440000  | -3.849479000 | 3.174417000  |
| H  | 3.774962000  | -2.018717000 | -4.273949000 |
| H  | -5.796543000 | -0.773441000 | -2.661326000 |
| H  | -1.494491000 | 1.027255000  | 4.850555000  |
| H  | 2.217076000  | 0.067893000  | 4.832701000  |
| H  | 6.429049000  | -1.919346000 | -0.903485000 |
| H  | -6.888575000 | -2.376100000 | -1.113321000 |
| H  | -0.960914000 | -1.272340000 | 5.596740000  |
| H  | 2.705612000  | -2.341638000 | 5.141272000  |
| H  | 6.017457000  | -2.418475000 | -3.295702000 |
| Ir | -0.092391000 | -1.304592000 | -1.113357000 |
| Cl | -1.607338000 | -2.542139000 | -2.583842000 |
| H  | -0.176246000 | -0.114386000 | -2.063581000 |

---

**E3**

---

| Coordinates (Angstroms) |              |              |              |
|-------------------------|--------------|--------------|--------------|
|                         | X            | Y            | Z            |
| P                       | -1.827950000 | -0.130003000 | -0.001028000 |
| P                       | 1.806510000  | -0.446124000 | -0.101379000 |
| O                       | 0.143462000  | 1.925765000  | -0.791792000 |
| C                       | 0.338421000  | 4.620331000  | -0.299306000 |
| C                       | -0.982126000 | 3.881919000  | -0.061978000 |
| C                       | 1.452785000  | 3.665511000  | 0.146351000  |
| C                       | -0.989113000 | 2.513799000  | -0.311903000 |
| C                       | 1.275657000  | 2.313263000  | -0.138595000 |
| C                       | 0.495228000  | 4.894422000  | -1.811324000 |
| C                       | 0.387385000  | 5.945480000  | 0.459152000  |
| C                       | -2.058287000 | 1.680084000  | -0.039523000 |
| C                       | 2.162038000  | 1.318200000  | 0.228929000  |
| C                       | -2.167179000 | 4.438730000  | 0.402142000  |
| C                       | 2.627240000  | 4.018523000  | 0.796179000  |
| C                       | -3.243322000 | 2.271622000  | 0.409552000  |
| C                       | 3.352052000  | 1.710669000  | 0.852254000  |
| C                       | -3.293966000 | 3.642805000  | 0.608569000  |
| C                       | 3.575171000  | 3.049425000  | 1.129101000  |
| C                       | -3.512314000 | -0.698577000 | -0.426704000 |
| C                       | -1.598772000 | -0.529870000 | 1.764020000  |
| C                       | 1.983126000  | -1.292974000 | 1.501472000  |
| C                       | 3.307746000  | -0.883572000 | -1.061223000 |
| C                       | -4.259596000 | -1.529639000 | 0.402138000  |
| C                       | -1.375378000 | -1.871972000 | 2.093236000  |
| C                       | 2.053175000  | -2.690027000 | 1.485430000  |
| C                       | 3.351688000  | -0.506258000 | -2.406200000 |
| C                       | -4.054524000 | -0.256681000 | -1.636098000 |
| C                       | -1.620871000 | 0.433285000  | 2.769825000  |
| C                       | 2.012078000  | -0.613816000 | 2.717146000  |

|   |              |              |              |
|---|--------------|--------------|--------------|
| C | 4.417586000  | -1.491541000 | -0.479096000 |
| C | -5.540139000 | -1.920936000 | 0.020577000  |
| C | -1.219408000 | -2.246566000 | 3.418961000  |
| C | 2.186413000  | -3.393671000 | 2.673218000  |
| C | 4.490356000  | -0.747862000 | -3.161093000 |
| C | -5.332774000 | -0.642112000 | -2.007932000 |
| C | -1.446885000 | 0.052661000  | 4.096796000  |
| C | 2.140369000  | -1.325627000 | 3.904538000  |
| C | 5.556010000  | -1.734396000 | -1.241693000 |
| C | -6.077529000 | -1.478584000 | -1.180527000 |
| C | -1.257325000 | -1.283519000 | 4.422683000  |
| C | 2.237100000  | -2.710915000 | 3.884440000  |
| C | 5.594048000  | -1.365644000 | -2.579990000 |
| H | 1.451747000  | 5.388937000  | -2.001661000 |
| H | 0.462212000  | 3.971675000  | -2.395530000 |
| H | -0.310232000 | 5.549200000  | -2.155306000 |
| H | -0.405781000 | 6.612100000  | 0.113401000  |
| H | 0.273618000  | 5.798575000  | 1.536706000  |
| H | 1.335090000  | 6.456182000  | 0.275320000  |
| H | -2.227059000 | 5.500133000  | 0.610813000  |
| H | 2.824496000  | 5.054731000  | 1.043204000  |
| H | -4.110594000 | 1.661806000  | 0.633950000  |
| H | 4.091591000  | 0.970918000  | 1.137796000  |
| H | -4.212437000 | 4.097283000  | 0.960715000  |
| H | 4.493430000  | 3.347104000  | 1.621494000  |
| H | -3.860504000 | -1.873572000 | 1.348621000  |
| H | -1.337903000 | -2.629426000 | 1.316389000  |
| H | 2.020234000  | -3.228302000 | 0.543033000  |
| H | 2.495771000  | -0.022614000 | -2.866695000 |
| H | -3.478326000 | 0.391238000  | -2.288264000 |
| H | -1.772778000 | 1.479639000  | 2.532643000  |
| H | 1.932818000  | 0.466206000  | 2.749483000  |

|    |              |              |              |
|----|--------------|--------------|--------------|
| H  | 4.407280000  | -1.775928000 | 0.566288000  |
| H  | -6.118292000 | -2.566871000 | 0.671835000  |
| H  | -1.055248000 | -3.288817000 | 3.666440000  |
| H  | 2.253471000  | -4.475517000 | 2.652148000  |
| H  | 4.515927000  | -0.453932000 | -4.204365000 |
| H  | -5.748731000 | -0.291942000 | -2.945914000 |
| H  | -1.462266000 | 0.807060000  | 4.875204000  |
| H  | 2.161572000  | -0.791480000 | 4.847595000  |
| H  | 6.415060000  | -2.210492000 | -0.782503000 |
| H  | -7.077374000 | -1.780884000 | -1.472248000 |
| H  | -1.124303000 | -1.575228000 | 5.458531000  |
| H  | 2.342809000  | -3.259782000 | 4.813555000  |
| H  | 6.483171000  | -1.556841000 | -3.170534000 |
| Ir | -0.108414000 | -1.306194000 | -1.175250000 |
| Cl | -1.755164000 | -2.518159000 | -2.525207000 |
| H  | -0.060277000 | -0.159874000 | -2.187563000 |
| H  | 1.004364000  | -2.512220000 | -1.851574000 |
| H  | 0.959989000  | -1.893463000 | -2.420903000 |

---

**TS<sub>E1-E2</sub>**

| Coordinates (Angstroms) |              |              |              |
|-------------------------|--------------|--------------|--------------|
|                         | X            | Y            | Z            |
| P                       | -1.080129000 | 1.414912000  | -1.580740000 |
| P                       | 0.149114000  | -0.057224000 | 1.698604000  |
| O                       | -0.454728000 | 2.653175000  | 1.116294000  |
| C                       | -1.563550000 | 4.771710000  | 2.457447000  |
| C                       | -1.793592000 | 4.610517000  | 0.955101000  |
| C                       | -1.666157000 | 3.358877000  | 3.034347000  |
| C                       | -1.236528000 | 3.480498000  | 0.355147000  |
| C                       | -1.051134000 | 2.345066000  | 2.310310000  |
| C                       | -0.135260000 | 5.306011000  | 2.707595000  |
| C                       | -2.571631000 | 5.727365000  | 3.091663000  |

|   |              |              |              |
|---|--------------|--------------|--------------|
| C | -1.509783000 | 3.088825000  | -0.937634000 |
| C | -0.986345000 | 1.019044000  | 2.700629000  |
| C | -2.562703000 | 5.441142000  | 0.154554000  |
| C | -2.288083000 | 2.992953000  | 4.221848000  |
| C | -2.275921000 | 3.955847000  | -1.726256000 |
| C | -1.598219000 | 0.690831000  | 3.912243000  |
| C | -2.774776000 | 5.129233000  | -1.188507000 |
| C | -2.254828000 | 1.668670000  | 4.649551000  |
| C | -0.226956000 | 1.954380000  | -3.107224000 |
| C | -2.774404000 | 0.808916000  | -1.954004000 |
| C | 0.127872000  | -1.540408000 | 2.777396000  |
| C | 1.712250000  | 0.828078000  | 2.138139000  |
| C | -0.880103000 | 2.235961000  | -4.305007000 |
| C | -3.105116000 | 0.079080000  | -3.096328000 |
| C | 1.232065000  | -1.982551000 | 3.504263000  |
| C | 2.608799000  | 1.304461000  | 1.185225000  |
| C | 1.142378000  | 2.197039000  | -2.995119000 |
| C | -3.734923000 | 0.978352000  | -0.950451000 |
| C | -1.083121000 | -2.225530000 | 2.893778000  |
| C | 1.948810000  | 1.117403000  | 3.488304000  |
| C | -0.162501000 | 2.734818000  | -5.387107000 |
| C | -4.382943000 | -0.448849000 | -3.242127000 |
| C | 1.126778000  | -3.095327000 | 4.330230000  |
| C | 3.722744000  | 2.045444000  | 1.572093000  |
| C | 1.852844000  | 2.703943000  | -4.074494000 |
| C | -5.005702000 | 0.438407000  | -1.095476000 |
| C | -1.192182000 | -3.324512000 | 3.734267000  |
| C | 3.065896000  | 1.842110000  | 3.873205000  |
| C | 1.202534000  | 2.968506000  | -5.275321000 |
| C | -5.334475000 | -0.272852000 | -2.244693000 |
| C | -0.085409000 | -3.764524000 | 4.451424000  |
| C | 3.957704000  | 2.310615000  | 2.913020000  |

|   |              |              |              |
|---|--------------|--------------|--------------|
| H | 0.044227000  | 5.395782000  | 3.782614000  |
| H | 0.626682000  | 4.645533000  | 2.286922000  |
| H | -0.023383000 | 6.294217000  | 2.252759000  |
| H | -2.463867000 | 6.729135000  | 2.669713000  |
| H | -3.601249000 | 5.393253000  | 2.936855000  |
| H | -2.391523000 | 5.811424000  | 4.165803000  |
| H | -3.017331000 | 6.332776000  | 0.569171000  |
| H | -2.792743000 | 3.735766000  | 4.828125000  |
| H | -2.511789000 | 3.698923000  | -2.752287000 |
| H | -1.558493000 | -0.317529000 | 4.300035000  |
| H | -3.370504000 | 5.790842000  | -1.806597000 |
| H | -2.734984000 | 1.395634000  | 5.582211000  |
| H | -1.945643000 | 2.073050000  | -4.409695000 |
| H | -2.367185000 | -0.093729000 | -3.867771000 |
| H | 2.185252000  | -1.475910000 | 3.422096000  |
| H | 2.450663000  | 1.116530000  | 0.132181000  |
| H | 1.658900000  | 1.981388000  | -2.066016000 |
| H | -3.494561000 | 1.534739000  | -0.049643000 |
| H | -1.951591000 | -1.894569000 | 2.333350000  |
| H | 1.254512000  | 0.781419000  | 4.250136000  |
| H | -0.676654000 | 2.942200000  | -6.319145000 |
| H | -4.630690000 | -1.003611000 | -4.140395000 |
| H | 1.996159000  | -3.435662000 | 4.881520000  |
| H | 4.406124000  | 2.415424000  | 0.816303000  |
| H | 2.917157000  | 2.883672000  | -3.977749000 |
| H | -5.740372000 | 0.577217000  | -0.310140000 |
| H | -2.141191000 | -3.840990000 | 3.821947000  |
| H | 3.234512000  | 2.047764000  | 4.924338000  |
| H | 1.758299000  | 3.358309000  | -6.121046000 |
| H | -6.328252000 | -0.691016000 | -2.361048000 |
| H | -0.167385000 | -4.627119000 | 5.103428000  |
| H | 4.828171000  | 2.885225000  | 3.210149000  |

|    |              |              |              |
|----|--------------|--------------|--------------|
| Ir | -0.116982000 | -0.546865000 | -0.587973000 |
| H  | 1.294082000  | 0.006072000  | -0.769085000 |
| Cl | 0.010650000  | -1.162755000 | -2.957748000 |
| H  | 0.479410000  | -2.224328000 | -0.395526000 |
| C  | 6.357594000  | 0.044652000  | 0.218109000  |
| C  | 7.258223000  | 1.103100000  | 0.170085000  |
| C  | 7.092619000  | 2.139077000  | -0.738394000 |
| C  | 5.995525000  | 2.113847000  | -1.594468000 |
| C  | 5.101214000  | 1.070074000  | -1.515756000 |
| C  | 5.238146000  | -0.006065000 | -0.626643000 |
| H  | 6.527341000  | -0.754882000 | 0.927638000  |
| H  | 8.104840000  | 1.103377000  | 0.847802000  |
| H  | 7.798886000  | 2.959422000  | -0.783158000 |
| H  | 5.809335000  | 2.908190000  | -2.308365000 |
| C  | 2.979309000  | -2.596486000 | 0.746002000  |
| C  | 4.330280000  | -1.933816000 | 0.558873000  |
| N  | 4.282033000  | -1.006362000 | -0.558103000 |
| C  | 3.699129000  | -1.533599000 | -1.801751000 |
| C  | 3.346548000  | -3.002317000 | -1.635886000 |
| N  | 2.491815000  | -3.228861000 | -0.474003000 |
| H  | 3.034821000  | -3.312448000 | 1.569132000  |
| H  | 4.528582000  | -1.376251000 | 1.476606000  |
| H  | 2.801340000  | -0.977725000 | -2.078477000 |
| H  | 2.869309000  | -3.356878000 | -2.542828000 |
| C  | -0.934805000 | -4.428608000 | 0.579961000  |
| C  | 0.567671000  | -4.189654000 | 0.683132000  |
| C  | 1.168830000  | -3.520221000 | -0.546098000 |
| C  | 0.670988000  | -4.118126000 | -1.848283000 |
| C  | -0.830512000 | -4.385166000 | -1.896428000 |
| C  | -1.308253000 | -5.179683000 | -0.689969000 |
| H  | -1.260902000 | -4.971896000 | 1.469789000  |
| H  | 0.805716000  | -3.637632000 | 1.586954000  |



|   |              |              |              |
|---|--------------|--------------|--------------|
| H | 0.944663000  | -3.491466000 | -2.692047000 |
| H | -1.361136000 | -3.428643000 | -1.936422000 |
| H | -0.841838000 | -6.172695000 | -0.685751000 |
| H | 1.083960000  | -5.156657000 | 0.751994000  |
| H | 1.210041000  | -5.069276000 | -1.949107000 |
| H | -1.052932000 | -4.910365000 | -2.829689000 |
| H | -2.390726000 | -5.330629000 | -0.737435000 |
| H | -1.455534000 | -3.464588000 | 0.590367000  |
| F | 4.000250000  | 1.121474000  | -2.307508000 |
| H | 4.255024000  | -3.595810000 | -1.501125000 |
| H | 4.417609000  | -1.452877000 | -2.623656000 |
| H | 5.126596000  | -2.684729000 | 0.454704000  |
| H | 2.253616000  | -1.820085000 | 1.014336000  |

---

**TS<sub>E3-E1</sub>**

| Coordinates (Angstroms) |              |              |              |
|-------------------------|--------------|--------------|--------------|
|                         | X            | Y            | Z            |
| P                       | -1.838049000 | -0.189348000 | -0.021516000 |
| P                       | 1.781087000  | -0.642939000 | -0.172364000 |
| O                       | 0.177928000  | 1.813556000  | -0.822922000 |
| C                       | 0.484041000  | 4.489248000  | -0.312646000 |
| C                       | -0.851957000 | 3.796290000  | -0.031767000 |
| C                       | 1.582543000  | 3.492841000  | 0.077890000  |
| C                       | -0.916993000 | 2.431967000  | -0.295629000 |
| C                       | 1.349787000  | 2.149394000  | -0.214225000 |
| C                       | 0.589215000  | 4.773020000  | -1.827711000 |
| C                       | 0.609186000  | 5.805592000  | 0.452386000  |
| C                       | -2.009677000 | 1.633904000  | -0.004895000 |
| C                       | 2.219910000  | 1.120734000  | 0.103689000  |
| C                       | -2.000953000 | 4.392615000  | 0.472077000  |
| C                       | 2.792551000  | 3.803149000  | 0.682207000  |
| C                       | -3.158476000 | 2.267966000  | 0.478442000  |

|   |              |              |              |
|---|--------------|--------------|--------------|
| C | 3.444016000  | 1.473691000  | 0.683158000  |
| C | -3.151809000 | 3.637484000  | 0.697826000  |
| C | 3.722240000  | 2.801281000  | 0.964547000  |
| C | -3.557373000 | -0.674780000 | -0.435951000 |
| C | -1.662848000 | -0.625970000 | 1.747071000  |
| C | 1.902089000  | -1.396841000 | 1.486341000  |
| C | 3.294424000  | -1.196062000 | -1.056347000 |
| C | -4.327930000 | -1.496480000 | 0.381219000  |
| C | -1.439121000 | -1.975174000 | 2.042526000  |
| C | 1.977363000  | -2.790603000 | 1.570326000  |
| C | 3.383925000  | -0.919605000 | -2.422701000 |
| C | -4.096787000 | -0.193610000 | -1.631584000 |
| C | -1.739491000 | 0.298732000  | 2.785930000  |
| C | 1.891854000  | -0.635152000 | 2.653621000  |
| C | 4.362925000  | -1.816088000 | -0.412458000 |
| C | -5.625407000 | -1.835886000 | 0.006384000  |
| C | -1.339195000 | -2.396686000 | 3.359855000  |
| C | 2.089778000  | -3.406844000 | 2.808493000  |
| C | 4.517814000  | -1.277434000 | -3.136797000 |
| C | -5.392170000 | -0.525639000 | -1.997738000 |
| C | -1.618691000 | -0.125717000 | 4.105648000  |
| C | 1.994563000  | -1.259883000 | 3.891206000  |
| C | 5.496360000  | -2.178256000 | -1.133584000 |
| C | -6.159428000 | -1.351054000 | -1.179663000 |
| C | -1.430375000 | -1.470589000 | 4.394326000  |
| C | 2.106238000  | -2.642216000 | 3.970406000  |
| C | 5.574411000  | -1.915075000 | -2.494138000 |
| H | 1.552535000  | 5.239184000  | -2.052477000 |
| H | 0.503493000  | 3.857246000  | -2.417428000 |
| H | -0.208060000 | 5.456021000  | -2.134117000 |
| H | -0.175092000 | 6.500732000  | 0.144627000  |
| H | 0.535142000  | 5.653985000  | 1.532819000  |

|    |              |              |              |
|----|--------------|--------------|--------------|
| H  | 1.564477000  | 6.287251000  | 0.232703000  |
| H  | -2.013850000 | 5.453114000  | 0.693846000  |
| H  | 3.030265000  | 4.830012000  | 0.933138000  |
| H  | -4.043994000 | 1.688777000  | 0.713857000  |
| H  | 4.169450000  | 0.708899000  | 0.937199000  |
| H  | -4.043427000 | 4.121606000  | 1.078874000  |
| H  | 4.668487000  | 3.063223000  | 1.423355000  |
| H  | -3.931934000 | -1.875101000 | 1.315861000  |
| H  | -1.351171000 | -2.702120000 | 1.240081000  |
| H  | 1.969973000  | -3.393053000 | 0.667476000  |
| H  | 2.561281000  | -0.431581000 | -2.934302000 |
| H  | -3.503746000 | 0.445410000  | -2.277541000 |
| H  | -1.890642000 | 1.351576000  | 2.579743000  |
| H  | 1.806959000  | 0.444103000  | 2.607476000  |
| H  | 4.319906000  | -2.028478000 | 0.648724000  |
| H  | -6.218584000 | -2.475224000 | 0.650918000  |
| H  | -1.172903000 | -3.445434000 | 3.577251000  |
| H  | 2.166586000  | -4.486922000 | 2.865158000  |
| H  | 4.571502000  | -1.068770000 | -4.199284000 |
| H  | -5.804094000 | -0.142802000 | -2.924865000 |
| H  | -1.673415000 | 0.601879000  | 4.907770000  |
| H  | 1.986998000  | -0.660767000 | 4.794883000  |
| H  | 6.316663000  | -2.673328000 | -0.626253000 |
| H  | -7.172450000 | -1.611346000 | -1.466575000 |
| H  | -1.338031000 | -1.797822000 | 5.424127000  |
| H  | 2.196946000  | -3.124998000 | 4.937174000  |
| H  | 6.454612000  | -2.207725000 | -3.055618000 |
| Ir | -0.146777000 | -1.367119000 | -1.284397000 |
| Cl | -1.835450000 | -2.489253000 | -2.653118000 |
| H  | -0.022231000 | -0.196183000 | -2.260190000 |
| H  | 1.025009000  | -2.835776000 | -1.933298000 |
| H  | 0.882856000  | -1.998274000 | -2.414790000 |

|   |             |              |              |
|---|-------------|--------------|--------------|
| C | 2.598326000 | -4.352075000 | -3.712642000 |
| C | 2.609067000 | -4.426750000 | -2.160175000 |
| O | 1.549978000 | -4.006583000 | -1.589964000 |
| O | 3.577176000 | -4.946756000 | -1.635918000 |
| F | 1.993038000 | -3.253686000 | -4.187988000 |
| F | 1.925901000 | -5.411156000 | -4.199314000 |
| F | 3.829279000 | -4.388094000 | -4.225769000 |

---

**F1**

| Coordinates (Angstroms) |              |              |              |
|-------------------------|--------------|--------------|--------------|
|                         | X            | Y            | Z            |
| P                       | 1.968858000  | -0.410124000 | -0.070422000 |
| P                       | -1.668968000 | -1.017801000 | -0.159832000 |
| O                       | -0.071657000 | 0.570115000  | 1.678831000  |
| C                       | -0.493091000 | 2.908288000  | 3.125517000  |
| C                       | 0.820933000  | 2.665511000  | 2.385609000  |
| C                       | -1.605891000 | 2.292556000  | 2.278362000  |
| C                       | 0.954277000  | 1.477650000  | 1.678332000  |
| C                       | -1.328513000 | 1.107067000  | 1.607009000  |
| C                       | -0.439946000 | 2.158426000  | 4.475175000  |
| C                       | -0.733546000 | 4.395714000  | 3.383511000  |
| C                       | 2.080328000  | 1.126422000  | 0.944320000  |
| C                       | -2.254329000 | 0.413886000  | 0.837387000  |
| C                       | 1.912892000  | 3.527323000  | 2.382325000  |
| C                       | -2.894352000 | 2.801234000  | 2.154338000  |
| C                       | 3.166805000  | 1.998519000  | 0.992298000  |
| C                       | -3.540426000 | 0.947762000  | 0.747912000  |
| C                       | 3.079515000  | 3.186811000  | 1.707133000  |
| C                       | -3.852582000 | 2.131350000  | 1.401771000  |
| C                       | 2.174496000  | -1.726796000 | 1.189871000  |
| C                       | 3.616021000  | -0.396570000 | -0.887133000 |
| C                       | -3.273050000 | -1.574230000 | -0.896300000 |

|   |              |              |              |
|---|--------------|--------------|--------------|
| C | -1.379198000 | -2.386802000 | 1.029250000  |
| C | 2.547003000  | -1.455332000 | 2.506344000  |
| C | 4.602256000  | -1.348970000 | -0.635329000 |
| C | -4.157988000 | -2.329134000 | -0.119268000 |
| C | -1.265969000 | -3.671285000 | 0.489293000  |
| C | 2.009132000  | -3.053228000 | 0.789548000  |
| C | 3.879429000  | 0.624385000  | -1.805740000 |
| C | -3.677267000 | -1.172572000 | -2.168663000 |
| C | -1.306835000 | -2.218940000 | 2.408419000  |
| C | 2.750224000  | -2.494369000 | 3.407509000  |
| C | 5.829817000  | -1.281967000 | -1.289105000 |
| C | -5.402663000 | -2.694397000 | -0.614965000 |
| C | -1.112667000 | -4.771534000 | 1.317898000  |
| C | 2.236023000  | -4.090597000 | 1.684102000  |
| C | 5.109000000  | 0.699722000  | -2.444090000 |
| C | -4.925182000 | -1.535656000 | -2.663812000 |
| C | -1.125013000 | -3.323245000 | 3.237639000  |
| C | 2.602717000  | -3.813575000 | 2.996411000  |
| C | 6.086924000  | -0.257942000 | -2.191279000 |
| C | -5.788578000 | -2.302452000 | -1.892016000 |
| C | -1.038912000 | -4.598874000 | 2.696928000  |
| H | -1.388047000 | 2.278539000  | 5.007471000  |
| H | -0.258439000 | 1.089893000  | 4.331420000  |
| H | 0.363920000  | 2.562804000  | 5.097174000  |
| H | 0.064790000  | 4.812098000  | 4.001263000  |
| H | -0.783469000 | 4.960358000  | 2.448557000  |
| H | -1.667018000 | 4.544362000  | 3.930494000  |
| H | 1.863794000  | 4.470249000  | 2.913220000  |
| H | -3.161871000 | 3.728765000  | 2.645502000  |
| H | 4.081515000  | 1.765280000  | 0.462787000  |
| H | -4.294939000 | 0.459119000  | 0.144809000  |
| H | 3.928299000  | 3.860923000  | 1.729314000  |

|    |              |              |              |
|----|--------------|--------------|--------------|
| H  | -4.850403000 | 2.544892000  | 1.312262000  |
| H  | 2.684872000  | -0.432369000 | 2.837783000  |
| H  | 4.427162000  | -2.147112000 | 0.076331000  |
| H  | -3.884487000 | -2.635911000 | 0.883385000  |
| H  | -1.315251000 | -3.814249000 | -0.585510000 |
| H  | 1.705616000  | -3.274842000 | -0.228175000 |
| H  | 3.120962000  | 1.368972000  | -2.015705000 |
| H  | -3.021397000 | -0.564988000 | -2.778295000 |
| H  | -1.405262000 | -1.237042000 | 2.854725000  |
| H  | 3.028751000  | -2.270307000 | 4.431489000  |
| H  | 6.586755000  | -2.031089000 | -1.083522000 |
| H  | -6.070554000 | -3.287302000 | 0.000221000  |
| H  | -1.037601000 | -5.763575000 | 0.886355000  |
| H  | 2.108423000  | -5.117103000 | 1.359239000  |
| H  | 5.300522000  | 1.502345000  | -3.148002000 |
| H  | -5.218242000 | -1.216092000 | -3.657902000 |
| H  | -1.060891000 | -3.180069000 | 4.310708000  |
| H  | 2.765471000  | -4.623809000 | 3.698919000  |
| H  | 7.045981000  | -0.202808000 | -2.694988000 |
| H  | -6.758733000 | -2.590815000 | -2.282046000 |
| H  | -0.907576000 | -5.457058000 | 3.347014000  |
| Ir | 0.027601000  | -0.582438000 | -1.599710000 |
| Cl | 1.414967000  | -0.275650000 | -3.672420000 |
| H  | -1.111019000 | -0.711094000 | -2.695953000 |
| H  | 0.194526000  | -2.132838000 | -1.738962000 |
| O  | -0.076766000 | 1.722168000  | -1.427308000 |
| C  | -1.102154000 | 2.410819000  | -1.633340000 |
| C  | -0.931868000 | 3.913583000  | -1.279143000 |
| F  | -0.743420000 | 4.634457000  | -2.402394000 |
| F  | -2.025485000 | 4.406303000  | -0.676672000 |
| F  | 0.108173000  | 4.162664000  | -0.474221000 |
| O  | -2.198364000 | 2.099262000  | -2.096940000 |

---

**F2**

---

| Coordinates (Angstroms) |              |              |              |
|-------------------------|--------------|--------------|--------------|
|                         | X            | Y            | Z            |
| P                       | 1.968858000  | -0.410124000 | -0.070422000 |
| P                       | -1.668968000 | -1.017801000 | -0.159832000 |
| O                       | -0.071657000 | 0.570115000  | 1.678831000  |
| C                       | -0.493091000 | 2.908288000  | 3.125517000  |
| C                       | 0.820933000  | 2.665511000  | 2.385609000  |
| C                       | -1.605891000 | 2.292556000  | 2.278362000  |
| C                       | 0.954277000  | 1.477650000  | 1.678332000  |
| C                       | -1.328513000 | 1.107067000  | 1.607009000  |
| C                       | -0.439946000 | 2.158426000  | 4.475175000  |
| C                       | -0.733546000 | 4.395714000  | 3.383511000  |
| C                       | 2.080328000  | 1.126422000  | 0.944320000  |
| C                       | -2.254329000 | 0.413886000  | 0.837387000  |
| C                       | 1.912892000  | 3.527323000  | 2.382325000  |
| C                       | -2.894352000 | 2.801234000  | 2.154338000  |
| C                       | 3.166805000  | 1.998519000  | 0.992298000  |
| C                       | -3.540426000 | 0.947762000  | 0.747912000  |
| C                       | 3.079515000  | 3.186811000  | 1.707133000  |
| C                       | -3.852582000 | 2.131350000  | 1.401771000  |
| C                       | 2.174496000  | -1.726796000 | 1.189871000  |
| C                       | 3.616021000  | -0.396570000 | -0.887133000 |
| C                       | -3.273050000 | -1.574230000 | -0.896300000 |
| C                       | -1.379198000 | -2.386802000 | 1.029250000  |
| C                       | 2.547003000  | -1.455332000 | 2.506344000  |
| C                       | 4.602256000  | -1.348970000 | -0.635329000 |
| C                       | -4.157988000 | -2.329134000 | -0.119268000 |
| C                       | -1.265969000 | -3.671285000 | 0.489293000  |
| C                       | 2.009132000  | -3.053228000 | 0.789548000  |
| C                       | 3.879429000  | 0.624385000  | -1.805740000 |

|   |              |              |              |
|---|--------------|--------------|--------------|
| C | -3.677267000 | -1.172572000 | -2.168663000 |
| C | -1.306835000 | -2.218940000 | 2.408419000  |
| C | 2.750224000  | -2.494369000 | 3.407509000  |
| C | 5.829817000  | -1.281967000 | -1.289105000 |
| C | -5.402663000 | -2.694397000 | -0.614965000 |
| C | -1.112667000 | -4.771534000 | 1.317898000  |
| C | 2.236023000  | -4.090597000 | 1.684102000  |
| C | 5.109000000  | 0.699722000  | -2.444090000 |
| C | -4.925182000 | -1.535656000 | -2.663812000 |
| C | -1.125013000 | -3.323245000 | 3.237639000  |
| C | 2.602717000  | -3.813575000 | 2.996411000  |
| C | 6.086924000  | -0.257942000 | -2.191279000 |
| C | -5.788578000 | -2.302452000 | -1.892016000 |
| C | -1.038912000 | -4.598874000 | 2.696928000  |
| H | -1.388047000 | 2.278539000  | 5.007471000  |
| H | -0.258439000 | 1.089893000  | 4.331420000  |
| H | 0.363920000  | 2.562804000  | 5.097174000  |
| H | 0.064790000  | 4.812098000  | 4.001263000  |
| H | -0.783469000 | 4.960358000  | 2.448557000  |
| H | -1.667018000 | 4.544362000  | 3.930494000  |
| H | 1.863794000  | 4.470249000  | 2.913220000  |
| H | -3.161871000 | 3.728765000  | 2.645502000  |
| H | 4.081515000  | 1.765280000  | 0.462787000  |
| H | -4.294939000 | 0.459119000  | 0.144809000  |
| H | 3.928299000  | 3.860923000  | 1.729314000  |
| H | -4.850403000 | 2.544892000  | 1.312262000  |
| H | 2.684872000  | -0.432369000 | 2.837783000  |
| H | 4.427162000  | -2.147112000 | 0.076331000  |
| H | -3.884487000 | -2.635911000 | 0.883385000  |
| H | -1.315251000 | -3.814249000 | -0.585510000 |
| H | 1.705616000  | -3.274842000 | -0.228175000 |
| H | 3.120962000  | 1.368972000  | -2.015705000 |



|    |              |              |              |
|----|--------------|--------------|--------------|
| H  | -3.021397000 | -0.564988000 | -2.778295000 |
| H  | -1.405262000 | -1.237042000 | 2.854725000  |
| H  | 3.028751000  | -2.270307000 | 4.431489000  |
| H  | 6.586755000  | -2.031089000 | -1.083522000 |
| H  | -6.070554000 | -3.287302000 | 0.000221000  |
| H  | -1.037601000 | -5.763575000 | 0.886355000  |
| H  | 2.108423000  | -5.117103000 | 1.359239000  |
| H  | 5.300522000  | 1.502345000  | -3.148002000 |
| H  | -5.218242000 | -1.216092000 | -3.657902000 |
| H  | -1.060891000 | -3.180069000 | 4.310708000  |
| H  | 2.765471000  | -4.623809000 | 3.698919000  |
| H  | 7.045981000  | -0.202808000 | -2.694988000 |
| H  | -6.758733000 | -2.590815000 | -2.282046000 |
| H  | -0.907576000 | -5.457058000 | 3.347014000  |
| Ir | 0.027601000  | -0.582438000 | -1.599710000 |
| Cl | 1.414967000  | -0.275650000 | -3.672420000 |
| H  | -1.111019000 | -0.711094000 | -2.695953000 |
| H  | 0.194526000  | -2.132838000 | -1.738962000 |
| O  | -0.076766000 | 1.722168000  | -1.427308000 |
| C  | -1.102154000 | 2.410819000  | -1.633340000 |
| C  | -0.931868000 | 3.913583000  | -1.279143000 |
| F  | -0.743420000 | 4.634457000  | -2.402394000 |
| F  | -2.025485000 | 4.406303000  | -0.676672000 |
| F  | 0.108173000  | 4.162664000  | -0.474221000 |
| O  | -2.198364000 | 2.099262000  | -2.096940000 |

---

### F3

| Coordinates (Angstroms) |              |              |              |
|-------------------------|--------------|--------------|--------------|
|                         | X            | Y            | Z            |
| P                       | 1.871860000  | -0.570596000 | 0.059943000  |
| P                       | -1.770523000 | -0.883848000 | -0.112753000 |

|   |              |              |              |
|---|--------------|--------------|--------------|
| O | -0.259635000 | 0.614310000  | 1.665347000  |
| C | -0.546969000 | 3.042942000  | 3.033305000  |
| C | 0.804468000  | 2.583489000  | 2.483162000  |
| C | -1.632145000 | 2.523014000  | 2.091393000  |
| C | 0.861509000  | 1.379023000  | 1.791734000  |
| C | -1.426338000 | 1.297768000  | 1.477374000  |
| C | -0.757541000 | 2.384196000  | 4.414169000  |
| C | -0.610477000 | 4.564281000  | 3.177214000  |
| C | 2.006118000  | 0.877172000  | 1.189590000  |
| C | -2.348469000 | 0.667071000  | 0.656813000  |
| C | 2.004835000  | 3.265267000  | 2.648798000  |
| C | -2.856063000 | 3.138700000  | 1.844151000  |
| C | 3.199331000  | 1.566832000  | 1.414133000  |
| C | -3.574561000 | 1.294025000  | 0.451606000  |
| C | 3.193259000  | 2.743988000  | 2.148483000  |
| C | -3.815699000 | 2.528232000  | 1.042024000  |
| C | 1.960883000  | -2.050730000 | 1.118473000  |
| C | 3.513874000  | -0.470734000 | -0.750757000 |
| C | -3.247360000 | -1.449085000 | -1.049187000 |
| C | -1.635175000 | -2.088924000 | 1.246619000  |
| C | 1.932201000  | -1.964551000 | 2.508009000  |
| C | 4.521400000  | -1.408088000 | -0.545469000 |
| C | -3.967587000 | -2.582441000 | -0.673954000 |
| C | -1.138912000 | -3.360895000 | 0.962048000  |
| C | 2.099098000  | -3.298365000 | 0.504637000  |
| C | 3.773233000  | 0.651463000  | -1.544419000 |
| C | -3.677846000 | -0.701094000 | -2.150345000 |
| C | -2.090852000 | -1.797925000 | 2.531872000  |
| C | 2.055522000  | -3.117306000 | 3.277417000  |
| C | 5.769378000  | -1.235845000 | -1.139842000 |
| C | -5.087581000 | -2.972837000 | -1.402344000 |
| C | -1.107971000 | -4.333729000 | 1.950847000  |

|   |              |              |              |
|---|--------------|--------------|--------------|
| C | 2.250666000  | -4.440608000 | 1.275928000  |
| C | 5.020049000  | 0.827781000  | -2.121852000 |
| C | -4.798869000 | -1.089390000 | -2.868459000 |
| C | -2.039379000 | -2.769295000 | 3.524126000  |
| C | 2.229084000  | -4.351096000 | 2.664510000  |
| C | 6.020751000  | -0.121037000 | -1.926437000 |
| C | -5.503119000 | -2.231759000 | -2.500021000 |
| C | -1.552480000 | -4.038079000 | 3.234598000  |
| H | -1.735373000 | 2.661825000  | 4.818103000  |
| H | -0.709460000 | 1.293868000  | 4.343289000  |
| H | 0.016439000  | 2.718731000  | 5.110881000  |
| H | 0.155389000  | 4.919416000  | 3.869213000  |
| H | -0.471797000 | 5.061987000  | 2.213917000  |
| H | -1.573178000 | 4.869407000  | 3.592674000  |
| H | 2.026931000  | 4.207360000  | 3.182939000  |
| H | -3.077857000 | 4.102022000  | 2.286963000  |
| H | 4.132042000  | 1.203811000  | 1.004131000  |
| H | -4.332944000 | 0.837910000  | -0.171703000 |
| H | 4.124441000  | 3.273287000  | 2.313484000  |
| H | -4.765005000 | 3.023108000  | 0.873986000  |
| H | 1.819402000  | -1.004660000 | 2.998934000  |
| H | 4.355485000  | -2.273448000 | 0.083269000  |
| H | -3.666101000 | -3.170207000 | 0.184225000  |
| H | -0.783342000 | -3.595347000 | -0.034845000 |
| H | 2.098764000  | -3.375856000 | -0.577946000 |
| H | 3.001133000  | 1.396145000  | -1.700422000 |
| H | -3.147864000 | 0.200322000  | -2.439138000 |
| H | -2.493957000 | -0.819902000 | 2.767750000  |
| H | 2.022599000  | -3.043646000 | 4.358651000  |
| H | 6.545049000  | -1.975508000 | -0.975443000 |
| H | -5.633508000 | -3.861132000 | -1.104627000 |
| H | -0.722018000 | -5.319940000 | 1.721265000  |

|    |              |              |              |
|----|--------------|--------------|--------------|
| H  | 2.373675000  | -5.403240000 | 0.792680000  |
| H  | 5.210736000  | 1.705429000  | -2.729357000 |
| H  | -5.122046000 | -0.497636000 | -3.717492000 |
| H  | -2.387626000 | -2.533169000 | 4.523421000  |
| H  | 2.335864000  | -5.246520000 | 3.266852000  |
| H  | 6.994600000  | 0.014623000  | -2.384190000 |
| H  | -6.376093000 | -2.538982000 | -3.065334000 |
| H  | -1.516752000 | -4.796333000 | 4.009032000  |
| Ir | 0.063788000  | -0.621741000 | -1.537943000 |
| Cl | 1.626424000  | -0.602955000 | -3.458296000 |
| H  | 0.188051000  | -2.181997000 | -1.537722000 |
| O  | 0.206251000  | 1.614657000  | -1.342936000 |
| C  | -0.687927000 | 2.402965000  | -1.742564000 |
| C  | -0.414240000 | 3.887475000  | -1.388104000 |
| F  | -1.527004000 | 4.496825000  | -0.954385000 |
| F  | 0.521797000  | 4.048009000  | -0.446680000 |
| F  | 0.002652000  | 4.551312000  | -2.481919000 |
| O  | -1.709762000 | 2.183064000  | -2.385444000 |
| H  | -1.051016000 | -0.360595000 | -2.830286000 |
| H  | -0.976063000 | -1.222996000 | -2.746918000 |

---

**TS<sub>F1-F2</sub>**

---

| Coordinates (Angstroms) |              |              |              |
|-------------------------|--------------|--------------|--------------|
|                         | X            | Y            | Z            |
| P                       | -1.077531000 | 1.312848000  | -1.602982000 |
| P                       | 0.089661000  | -0.172255000 | 1.708565000  |
| O                       | -0.405170000 | 2.510014000  | 1.105294000  |
| C                       | -1.431059000 | 4.700982000  | 2.413789000  |
| C                       | -1.569722000 | 4.570446000  | 0.896975000  |
| C                       | -1.639195000 | 3.295001000  | 2.979911000  |
| C                       | -1.072193000 | 3.402963000  | 0.316990000  |
| C                       | -1.048070000 | 2.249673000  | 2.284119000  |

|   |              |              |              |
|---|--------------|--------------|--------------|
| C | 0.007766000  | 5.152412000  | 2.753117000  |
| C | -2.422093000 | 5.706667000  | 2.995298000  |
| C | -1.283935000 | 3.048351000  | -0.998767000 |
| C | -1.031256000 | 0.929325000  | 2.693604000  |
| C | -2.185139000 | 5.483115000  | 0.053518000  |
| C | -2.311286000 | 2.961125000  | 4.150403000  |
| C | -1.877843000 | 4.005467000  | -1.830693000 |
| C | -1.691859000 | 0.631284000  | 3.884575000  |
| C | -2.299719000 | 5.217073000  | -1.311147000 |
| C | -2.340756000 | 1.639614000  | 4.588663000  |
| C | -0.156128000 | 1.720046000  | -3.139558000 |
| C | -2.832577000 | 0.979510000  | -2.049591000 |
| C | 0.102942000  | -1.629173000 | 2.828621000  |
| C | 1.663504000  | 0.714517000  | 2.123071000  |
| C | -0.769861000 | 1.959676000  | -4.366413000 |
| C | -3.183007000 | 0.121929000  | -3.094443000 |
| C | 1.227716000  | -2.031811000 | 3.548849000  |
| C | 2.584878000  | 1.122958000  | 1.163033000  |
| C | 1.223884000  | 1.890087000  | -3.018337000 |
| C | -3.838116000 | 1.484934000  | -1.222036000 |
| C | -1.089951000 | -2.338046000 | 2.983597000  |
| C | 1.888309000  | 1.064997000  | 3.460598000  |
| C | -0.008630000 | 2.344041000  | -5.465824000 |
| C | -4.514139000 | -0.207150000 | -3.315909000 |
| C | 1.160550000  | -3.126089000 | 4.403053000  |
| C | 3.707848000  | 1.860677000  | 1.529963000  |
| C | 1.979067000  | 2.283292000  | -4.114616000 |
| C | -5.166740000 | 1.143652000  | -1.439247000 |
| C | -1.160370000 | -3.419113000 | 3.851379000  |
| C | 3.014014000  | 1.786271000  | 3.827484000  |
| C | 1.365225000  | 2.505409000  | -5.343405000 |
| C | -5.509235000 | 0.299271000  | -2.487895000 |

|   |              |              |              |
|---|--------------|--------------|--------------|
| C | -0.034044000 | -3.819166000 | 4.560497000  |
| C | 3.928613000  | 2.189579000  | 2.859323000  |
| H | 0.134164000  | 5.215320000  | 3.837657000  |
| H | 0.753767000  | 4.456555000  | 2.360785000  |
| H | 0.197578000  | 6.139553000  | 2.322132000  |
| H | -2.239585000 | 6.703471000  | 2.587649000  |
| H | -3.457280000 | 5.427584000  | 2.780178000  |
| H | -2.298926000 | 5.777441000  | 4.078377000  |
| H | -2.587859000 | 6.407942000  | 0.448850000  |
| H | -2.804897000 | 3.726970000  | 4.737037000  |
| H | -2.050973000 | 3.788687000  | -2.878131000 |
| H | -1.701562000 | -0.375880000 | 4.278508000  |
| H | -2.763185000 | 5.947599000  | -1.964136000 |
| H | -2.862294000 | 1.393228000  | 5.506562000  |
| H | -1.841169000 | 1.849204000  | -4.480414000 |
| H | -2.414616000 | -0.312713000 | -3.720033000 |
| H | 2.169781000  | -1.509991000 | 3.438360000  |
| H | 2.435731000  | 0.880638000  | 0.119894000  |
| H | 1.713373000  | 1.706988000  | -2.067510000 |
| H | -3.592538000 | 2.135290000  | -0.390227000 |
| H | -1.974436000 | -2.039124000 | 2.433587000  |
| H | 1.177793000  | 0.777263000  | 4.227234000  |
| H | -0.496439000 | 2.518999000  | -6.418553000 |
| H | -4.770506000 | -0.875064000 | -4.130860000 |
| H | 2.046566000  | -3.433590000 | 4.947425000  |
| H | 4.408757000  | 2.181684000  | 0.768124000  |
| H | 3.049773000  | 2.410921000  | -4.009562000 |
| H | -5.932488000 | 1.532339000  | -0.777380000 |
| H | -2.097375000 | -3.952756000 | 3.964289000  |
| H | 3.171939000  | 2.038945000  | 4.870080000  |
| H | 1.957328000  | 2.805959000  | -6.201001000 |
| H | -6.546687000 | 0.030965000  | -2.654417000 |

|    |              |              |              |
|----|--------------|--------------|--------------|
| H  | -0.086224000 | -4.667661000 | 5.233948000  |
| H  | 4.805709000  | 2.762125000  | 3.140767000  |
| Ir | -0.224326000 | -0.705646000 | -0.560545000 |
| H  | 1.211658000  | -0.167982000 | -0.755903000 |
| Cl | -0.127441000 | -1.394074000 | -2.923874000 |
| H  | 0.412758000  | -2.357910000 | -0.329578000 |
| C  | 6.548597000  | -0.241315000 | 0.206988000  |
| C  | 7.532548000  | 0.739851000  | 0.150199000  |
| C  | 7.424837000  | 1.809266000  | -0.727618000 |
| C  | 6.299064000  | 1.897943000  | -1.541386000 |
| C  | 5.323638000  | 0.930815000  | -1.454272000 |
| C  | 5.402128000  | -0.181201000 | -0.601661000 |
| H  | 6.675365000  | -1.071472000 | 0.889889000  |
| H  | 8.398459000  | 0.652658000  | 0.797316000  |
| H  | 8.194690000  | 2.569715000  | -0.779075000 |
| H  | 6.152257000  | 2.725781000  | -2.225902000 |
| C  | 2.987090000  | -2.638897000 | 0.758231000  |
| C  | 4.373568000  | -2.057564000 | 0.569248000  |
| N  | 4.378645000  | -1.106883000 | -0.527588000 |
| C  | 3.666892000  | -1.522016000 | -1.742574000 |
| C  | 3.260916000  | -2.984417000 | -1.649595000 |
| N  | 2.472891000  | -3.266879000 | -0.451380000 |
| H  | 3.009649000  | -3.348051000 | 1.587633000  |
| H  | 4.620047000  | -1.533740000 | 1.495612000  |
| H  | 2.778919000  | -0.908403000 | -1.910040000 |
| H  | 2.706404000  | -3.244944000 | -2.544304000 |
| C  | -0.842088000 | -4.646049000 | 0.743642000  |
| C  | 0.643443000  | -4.303150000 | 0.791224000  |
| C  | 1.165443000  | -3.627656000 | -0.471043000 |
| C  | 0.664270000  | -4.287549000 | -1.741910000 |
| C  | -0.818043000 | -4.646986000 | -1.739701000 |
| C  | -1.214815000 | -5.438454000 | -0.501619000 |

|   |              |              |              |
|---|--------------|--------------|--------------|
| H | -1.096009000 | -5.200138000 | 1.650667000  |
| H | 0.862836000  | -3.709394000 | 1.672472000  |
| H | 0.871813000  | -3.668722000 | -2.609425000 |
| H | -1.406284000 | -3.727809000 | -1.786912000 |
| H | -0.701835000 | -6.408775000 | -0.494625000 |
| H | 1.229873000  | -5.228982000 | 0.870899000  |
| H | 1.262690000  | -5.203914000 | -1.833887000 |
| H | -1.030911000 | -5.212007000 | -2.652184000 |
| H | -2.290274000 | -5.639706000 | -0.509611000 |
| H | -1.422277000 | -3.720413000 | 0.763636000  |
| F | 4.197835000  | 1.103182000  | -2.193223000 |
| O | -2.308266000 | -1.737301000 | -0.544320000 |
| C | -3.284264000 | -1.514123000 | 0.202776000  |
| C | -4.461625000 | -2.502801000 | -0.011343000 |
| F | -4.482354000 | -3.053779000 | -1.231181000 |
| F | -5.653946000 | -1.925414000 | 0.187268000  |
| F | -4.362056000 | -3.516626000 | 0.876925000  |
| O | -3.434081000 | -0.688311000 | 1.104418000  |
| H | 4.152687000  | -3.618187000 | -1.626255000 |
| H | 4.317580000  | -1.418990000 | -2.615546000 |
| H | 5.115241000  | -2.859380000 | 0.438752000  |
| H | 2.299214000  | -1.825125000 | 1.019983000  |

---

**TSF3-E1**

---

| Coordinates (Angstroms) |              |              |              |
|-------------------------|--------------|--------------|--------------|
|                         | X            | Y            | Z            |
| P                       | -2.001250000 | 0.175216000  | -0.074673000 |
| P                       | 1.515335000  | 1.223360000  | -0.126776000 |
| O                       | 0.218138000  | -0.278966000 | 1.802489000  |
| C                       | 0.881126000  | -2.383883000 | 3.527505000  |
| C                       | -0.502195000 | -2.275046000 | 2.883218000  |
| C                       | 1.899015000  | -1.806550000 | 2.544948000  |



|   |              |              |              |
|---|--------------|--------------|--------------|
| C | -0.746305000 | -1.218545000 | 2.012041000  |
| C | 1.504354000  | -0.735253000 | 1.759862000  |
| C | 0.894925000  | -1.506982000 | 4.799107000  |
| C | 1.217511000  | -3.827907000 | 3.902754000  |
| C | -1.933182000 | -1.041573000 | 1.312976000  |
| C | 2.339967000  | -0.048978000 | 0.890554000  |
| C | -1.565134000 | -3.134143000 | 3.138544000  |
| C | 3.223154000  | -2.216311000 | 2.409431000  |
| C | -2.989967000 | -1.898584000 | 1.630553000  |
| C | 3.665337000  | -0.463915000 | 0.797773000  |
| C | -2.806473000 | -2.924137000 | 2.546645000  |
| C | 4.093960000  | -1.550462000 | 1.551706000  |
| C | -2.536312000 | 1.751322000  | 0.664760000  |
| C | -3.504642000 | -0.455800000 | -0.923032000 |
| C | 2.919523000  | 2.028291000  | -1.004114000 |
| C | 0.972162000  | 2.525626000  | 1.027639000  |
| C | -2.681916000 | 1.916576000  | 2.039372000  |
| C | -4.708883000 | 0.239045000  | -0.980017000 |
| C | 3.365545000  | 3.297111000  | -0.630100000 |
| C | 0.243571000  | 3.594854000  | 0.507008000  |
| C | -2.844640000 | 2.807359000  | -0.196866000 |
| C | -3.429302000 | -1.738271000 | -1.476240000 |
| C | 3.599559000  | 1.347433000  | -2.018683000 |
| C | 1.333878000  | 2.527479000  | 2.373439000  |
| C | -3.150845000 | 3.124567000  | 2.546796000  |
| C | -5.821421000 | -0.336070000 | -1.591082000 |
| C | 4.451855000  | 3.881414000  | -1.272856000 |
| C | -0.110020000 | 4.660405000  | 1.322505000  |
| C | -3.335185000 | 4.000450000  | 0.311455000  |
| C | -4.539972000 | -2.313692000 | -2.071284000 |
| C | 4.688139000  | 1.929838000  | -2.652832000 |
| C | 0.957788000  | 3.585434000  | 3.192558000  |

|   |              |              |              |
|---|--------------|--------------|--------------|
| C | -3.489904000 | 4.159987000  | 1.685260000  |
| C | -5.739943000 | -1.609869000 | -2.135411000 |
| C | 5.113184000  | 3.202699000  | -2.286976000 |
| C | 0.240429000  | 4.653902000  | 2.668125000  |
| H | 1.882571000  | -1.541002000 | 5.267933000  |
| H | 0.659170000  | -0.464773000 | 4.566236000  |
| H | 0.155037000  | -1.875366000 | 5.515622000  |
| H | 0.499299000  | -4.215654000 | 4.627876000  |
| H | 1.216214000  | -4.480734000 | 3.025707000  |
| H | 2.200541000  | -3.881274000 | 4.375377000  |
| H | -1.439312000 | -3.967368000 | 3.819406000  |
| H | 3.591985000  | -3.057130000 | 2.984327000  |
| H | -3.952073000 | -1.783431000 | 1.149108000  |
| H | 4.357977000  | 0.041160000  | 0.136027000  |
| H | -3.632976000 | -3.583957000 | 2.783641000  |
| H | 5.121320000  | -1.885091000 | 1.468309000  |
| H | -2.438393000 | 1.107399000  | 2.718993000  |
| H | -4.802552000 | 1.224823000  | -0.541710000 |
| H | 2.873648000  | 3.843275000  | 0.164552000  |
| H | -0.037745000 | 3.600766000  | -0.540257000 |
| H | -2.710424000 | 2.690465000  | -1.267664000 |
| H | -2.500189000 | -2.294549000 | -1.429315000 |
| H | 3.303012000  | 0.347458000  | -2.307760000 |
| H | 1.914278000  | 1.712291000  | 2.790272000  |
| H | -3.258255000 | 3.250734000  | 3.618316000  |
| H | -6.754338000 | 0.215417000  | -1.629703000 |
| H | 4.778741000  | 4.871083000  | -0.973629000 |
| H | -0.670101000 | 5.490453000  | 0.908332000  |
| H | -3.587437000 | 4.809806000  | -0.364513000 |
| H | -4.467581000 | -3.310322000 | -2.492457000 |
| H | 5.204368000  | 1.385143000  | -3.435373000 |
| H | 1.232917000  | 3.575168000  | 4.241307000  |

|    |              |              |              |
|----|--------------|--------------|--------------|
| H  | -3.866719000 | 5.095466000  | 2.083989000  |
| H  | -6.608784000 | -2.057927000 | -2.605278000 |
| H  | 5.960213000  | 3.659277000  | -2.786982000 |
| H  | -0.047281000 | 5.481081000  | 3.307819000  |
| Ir | -0.080260000 | 0.282026000  | -1.537461000 |
| Cl | -1.367286000 | -0.489976000 | -3.504688000 |
| H  | -0.405675000 | 1.743699000  | -1.966649000 |
| O  | 0.354335000  | -1.899006000 | -0.948706000 |
| C  | 1.330313000  | -2.334036000 | -1.573405000 |
| C  | 1.843332000  | -3.739106000 | -1.213025000 |
| F  | 3.164456000  | -3.721058000 | -1.010992000 |
| F  | 1.263523000  | -4.211495000 | -0.111565000 |
| F  | 1.591725000  | -4.592433000 | -2.213109000 |
| O  | 1.958512000  | -1.740313000 | -2.485999000 |
| H  | 1.365053000  | -0.533788000 | -2.562648000 |
| H  | 1.096566000  | 0.445434000  | -2.708235000 |

---

**E2c**

| Coordinates (Angstroms) |              |              |              |
|-------------------------|--------------|--------------|--------------|
|                         | X            | Y            | Z            |
| P                       | -1.915193000 | -0.516674000 | -0.116251000 |
| P                       | 1.791759000  | -0.275232000 | 0.062312000  |
| O                       | -0.134696000 | 1.756615000  | -0.825541000 |
| C                       | -0.460130000 | 4.436474000  | -0.412439000 |
| C                       | -1.684065000 | 3.531058000  | -0.565014000 |
| C                       | 0.542652000  | 3.642474000  | 0.434499000  |
| C                       | -1.435306000 | 2.169420000  | -0.702817000 |
| C                       | 0.691719000  | 2.293131000  | 0.126573000  |
| C                       | 0.165763000  | 4.697601000  | -1.800191000 |
| C                       | -0.820020000 | 5.773265000  | 0.231994000  |
| C                       | -2.415103000 | 1.191958000  | -0.588520000 |
| C                       | 1.603632000  | 1.439889000  | 0.731648000  |

|   |              |              |              |
|---|--------------|--------------|--------------|
| C | -3.013979000 | 3.927974000  | -0.487906000 |
| C | 1.331936000  | 4.143289000  | 1.461782000  |
| C | -3.742860000 | 1.624344000  | -0.534329000 |
| C | 2.382441000  | 1.981666000  | 1.756719000  |
| C | -4.034789000 | 2.981229000  | -0.522346000 |
| C | 2.234457000  | 3.312618000  | 2.122738000  |
| C | -3.493302000 | -1.415623000 | -0.382350000 |
| C | -1.759452000 | -0.372295000 | 1.709930000  |
| C | 2.606651000  | -1.141588000 | 1.457874000  |
| C | 3.144865000  | 0.012483000  | -1.156830000 |
| C | -4.420491000 | -1.621647000 | 0.638114000  |
| C | -1.674328000 | -1.552124000 | 2.456046000  |
| C | 3.946159000  | -0.924046000 | 1.797318000  |
| C | 4.134494000  | -0.947792000 | -1.374078000 |
| C | -3.809700000 | -1.815867000 | -1.683063000 |
| C | -1.635537000 | 0.852278000  | 2.362577000  |
| C | 1.838227000  | -1.990332000 | 2.253314000  |
| C | 3.130165000  | 1.158191000  | -1.955382000 |
| C | -5.636389000 | -2.241435000 | 0.365358000  |
| C | -1.465293000 | -1.505309000 | 3.826199000  |
| C | 4.499997000  | -1.547895000 | 2.907210000  |
| C | 5.101465000  | -0.754146000 | -2.353271000 |
| C | -5.027545000 | -2.422669000 | -1.954507000 |
| C | -1.402794000 | 0.896123000  | 3.734347000  |
| C | 2.390185000  | -2.605013000 | 3.371514000  |
| C | 4.093267000  | 1.346206000  | -2.939685000 |
| C | -5.941834000 | -2.642641000 | -0.928546000 |
| C | -1.316499000 | -0.279058000 | 4.467789000  |
| C | 3.722462000  | -2.387486000 | 3.698504000  |
| C | 5.084320000  | 0.392037000  | -3.139137000 |
| H | 1.077509000  | 5.291690000  | -1.691990000 |
| H | 0.420375000  | 3.766990000  | -2.312518000 |

|    |              |              |              |
|----|--------------|--------------|--------------|
| H  | -0.538515000 | 5.252383000  | -2.426490000 |
| H  | -1.524600000 | 6.322183000  | -0.396695000 |
| H  | -1.267548000 | 5.640063000  | 1.220798000  |
| H  | 0.071000000  | 6.396981000  | 0.333815000  |
| H  | -3.265170000 | 4.976995000  | -0.385640000 |
| H  | 1.252173000  | 5.182572000  | 1.757570000  |
| H  | -4.549113000 | 0.904252000  | -0.463341000 |
| H  | 3.098203000  | 1.365985000  | 2.286227000  |
| H  | -5.068378000 | 3.305219000  | -0.482454000 |
| H  | 2.837795000  | 3.712698000  | 2.929570000  |
| H  | -4.209078000 | -1.296368000 | 1.649637000  |
| H  | -1.765031000 | -2.514246000 | 1.962963000  |
| H  | 4.564695000  | -0.265523000 | 1.198886000  |
| H  | 4.158220000  | -1.852484000 | -0.780427000 |
| H  | -3.102533000 | -1.651379000 | -2.488322000 |
| H  | -1.717078000 | 1.785170000  | 1.818751000  |
| H  | 0.802010000  | -2.172588000 | 2.001000000  |
| H  | 2.369294000  | 1.918584000  | -1.820347000 |
| H  | -6.346932000 | -2.403088000 | 1.168353000  |
| H  | -1.404825000 | -2.429133000 | 4.390693000  |
| H  | 5.541327000  | -1.374098000 | 3.154572000  |
| H  | 5.867986000  | -1.506785000 | -2.502574000 |
| H  | -5.261234000 | -2.726077000 | -2.969004000 |
| H  | -1.292896000 | 1.856567000  | 4.225407000  |
| H  | 1.775572000  | -3.257179000 | 3.982252000  |
| H  | 4.068818000  | 2.244586000  | -3.546811000 |
| H  | -6.890592000 | -3.123961000 | -1.139087000 |
| H  | -1.136512000 | -0.242201000 | 5.536536000  |
| H  | 4.156766000  | -2.870972000 | 4.566740000  |
| H  | 5.839466000  | 0.540884000  | -3.903286000 |
| Ir | -0.085417000 | -1.517821000 | -1.030758000 |
| H  | 0.277218000  | -0.267585000 | -2.340881000 |

|    |              |              |              |
|----|--------------|--------------|--------------|
| H  | -0.194969000 | -2.516432000 | 0.184681000  |
| H  | -1.132362000 | -2.522368000 | -1.684469000 |
| H  | -0.294777000 | -0.751841000 | -2.675664000 |
| Cl | 1.621015000  | -3.049535000 | -2.009792000 |

---

**E3c**

---

| Coordinates (Angstroms) |              |              |              |
|-------------------------|--------------|--------------|--------------|
|                         | X            | Y            | Z            |
| P                       | -1.123569000 | -1.393767000 | 0.278586000  |
| P                       | 2.216908000  | 0.250208000  | -0.251751000 |
| O                       | -0.344290000 | 1.467953000  | 0.608068000  |
| C                       | -1.074187000 | 3.354628000  | 2.448831000  |
| C                       | -1.953543000 | 2.125761000  | 2.219737000  |
| C                       | 0.372435000  | 2.853434000  | 2.389363000  |
| C                       | -1.496138000 | 1.194777000  | 1.291183000  |
| C                       | 0.672912000  | 1.916381000  | 1.402145000  |
| C                       | -1.302853000 | 4.360429000  | 1.298282000  |
| C                       | -1.383590000 | 4.040107000  | 3.778214000  |
| C                       | -2.082778000 | -0.046905000 | 1.091501000  |
| C                       | 1.937220000  | 1.389129000  | 1.181269000  |
| C                       | -3.138823000 | 1.835247000  | 2.881313000  |
| C                       | 1.413071000  | 3.260805000  | 3.213053000  |
| C                       | -3.288158000 | -0.295471000 | 1.754171000  |
| C                       | 2.959871000  | 1.831888000  | 2.024309000  |
| C                       | -3.819236000 | 0.648624000  | 2.619471000  |
| C                       | 2.696192000  | 2.748661000  | 3.030911000  |
| C                       | -2.487421000 | -2.541678000 | -0.166385000 |
| C                       | -0.283826000 | -2.174615000 | 1.713302000  |
| C                       | 3.613734000  | -0.771329000 | 0.358622000  |
| C                       | 2.960960000  | 1.447574000  | -1.436093000 |
| C                       | -2.922963000 | -3.560046000 | 0.681456000  |
| C                       | 0.175406000  | -3.489699000 | 1.590066000  |

|   |              |              |              |
|---|--------------|--------------|--------------|
| C | 4.930775000  | -0.306956000 | 0.438469000  |
| C | 4.017043000  | 1.097199000  | -2.277382000 |
| C | -3.178924000 | -2.302678000 | -1.356258000 |
| C | 0.031957000  | -1.448898000 | 2.859677000  |
| C | 3.318738000  | -2.045652000 | 0.841703000  |
| C | 2.365783000  | 2.702688000  | -1.583736000 |
| C | -4.016430000 | -4.345733000 | 0.330229000  |
| C | 0.922687000  | -4.071055000 | 2.603888000  |
| C | 5.925546000  | -1.107198000 | 0.985543000  |
| C | 4.488722000  | 1.996980000  | -3.226266000 |
| C | -4.277351000 | -3.079543000 | -1.697587000 |
| C | 0.804548000  | -2.026105000 | 3.863592000  |
| C | 4.312367000  | -2.841456000 | 1.399434000  |
| C | 2.830873000  | 3.596068000  | -2.540638000 |
| C | -4.693625000 | -4.108859000 | -0.859051000 |
| C | 1.247866000  | -3.335962000 | 3.740549000  |
| C | 5.619020000  | -2.374796000 | 1.469585000  |
| C | 3.898128000  | 3.247470000  | -3.361255000 |
| H | -0.618171000 | 5.207089000  | 1.401671000  |
| H | -1.145682000 | 3.901553000  | 0.320524000  |
| H | -2.329283000 | 4.736059000  | 1.335180000  |
| H | -2.415969000 | 4.396498000  | 3.793374000  |
| H | -1.235401000 | 3.366383000  | 4.626869000  |
| H | -0.742387000 | 4.914330000  | 3.912303000  |
| H | -3.542796000 | 2.530112000  | 3.607849000  |
| H | 1.238028000  | 3.982994000  | 4.001484000  |
| H | -3.803078000 | -1.238138000 | 1.616801000  |
| H | 3.967420000  | 1.454015000  | 1.907284000  |
| H | -4.756949000 | 0.444754000  | 3.123450000  |
| H | 3.499831000  | 3.073109000  | 3.682094000  |
| H | -2.424267000 | -3.743391000 | 1.625330000  |
| H | -0.039393000 | -4.059015000 | 0.691875000  |

|    |              |              |              |
|----|--------------|--------------|--------------|
| H  | 5.189576000  | 0.681244000  | 0.077382000  |
| H  | 4.475635000  | 0.119414000  | -2.203529000 |
| H  | -2.872364000 | -1.496138000 | -2.012320000 |
| H  | -0.313501000 | -0.429202000 | 2.984122000  |
| H  | 2.306038000  | -2.421800000 | 0.780808000  |
| H  | 1.528647000  | 2.993440000  | -0.957599000 |
| H  | -4.340243000 | -5.138815000 | 0.995154000  |
| H  | 1.266917000  | -5.093825000 | 2.497531000  |
| H  | 6.942716000  | -0.734840000 | 1.037732000  |
| H  | 5.315210000  | 1.712018000  | -3.868302000 |
| H  | -4.807262000 | -2.879632000 | -2.622342000 |
| H  | 1.054199000  | -1.446018000 | 4.745136000  |
| H  | 4.061442000  | -3.827951000 | 1.773970000  |
| H  | 2.356591000  | 4.565885000  | -2.642973000 |
| H  | -5.547418000 | -4.720299000 | -1.130436000 |
| H  | 1.846506000  | -3.784506000 | 4.525653000  |
| H  | 6.397872000  | -2.996324000 | 1.897872000  |
| H  | 4.264323000  | 3.946648000  | -4.105185000 |
| Ir | 0.367697000  | -1.008339000 | -1.408646000 |
| H  | -0.068957000 | 0.711612000  | -1.863817000 |
| H  | 0.980897000  | -2.409418000 | -0.991510000 |
| H  | -0.608654000 | -1.908924000 | -2.275389000 |
| H  | -0.667737000 | 0.245434000  | -2.193406000 |
| Cl | 1.806017000  | -1.094705000 | -3.444059000 |
| C  | -4.223937000 | 1.866099000  | -1.362411000 |
| F  | -5.136110000 | 2.502961000  | -2.130454000 |
| F  | -4.126513000 | 2.563382000  | -0.222153000 |
| F  | -4.754026000 | 0.671787000  | -1.050297000 |
| C  | -2.876792000 | 1.746515000  | -2.135952000 |
| O  | -2.843622000 | 0.814350000  | -2.957644000 |
| O  | -2.033233000 | 2.616819000  | -1.880101000 |

---



**E4c**

---

| Coordinates (Angstroms) |              |              |              |
|-------------------------|--------------|--------------|--------------|
|                         | X            | Y            | Z            |
| P                       | -1.073479000 | -1.398786000 | 0.226100000  |
| P                       | 2.191684000  | 0.258188000  | -0.271381000 |
| O                       | -0.383237000 | 1.473351000  | 0.535810000  |
| C                       | -1.178692000 | 3.345961000  | 2.367098000  |
| C                       | -2.061749000 | 2.132453000  | 2.069254000  |
| C                       | 0.269032000  | 2.839666000  | 2.354197000  |
| C                       | -1.558734000 | 1.194378000  | 1.173443000  |
| C                       | 0.606193000  | 1.918084000  | 1.364230000  |
| C                       | -1.345534000 | 4.389752000  | 1.241222000  |
| C                       | -1.544037000 | 3.992594000  | 3.702490000  |
| C                       | -2.123985000 | -0.056586000 | 0.958140000  |
| C                       | 1.876807000  | 1.394833000  | 1.169229000  |
| C                       | -3.290805000 | 1.854478000  | 2.654011000  |
| C                       | 1.282088000  | 3.235754000  | 3.217459000  |
| C                       | -3.373611000 | -0.288748000 | 1.538746000  |
| C                       | 2.869314000  | 1.828780000  | 2.051822000  |
| C                       | -3.960157000 | 0.671606000  | 2.351511000  |
| C                       | 2.570918000  | 2.728464000  | 3.065419000  |
| C                       | -2.373968000 | -2.662564000 | -0.116189000 |
| C                       | -0.245944000 | -2.050686000 | 1.743012000  |
| C                       | 3.643226000  | -0.676840000 | 0.368921000  |
| C                       | 2.914876000  | 1.488681000  | -1.440080000 |
| C                       | -2.832820000 | -3.525926000 | 0.881924000  |
| C                       | 0.247508000  | -3.359495000 | 1.717261000  |
| C                       | 4.939678000  | -0.155768000 | 0.427523000  |
| C                       | 3.972851000  | 1.160660000  | -2.288728000 |
| C                       | -2.993033000 | -2.696133000 | -1.366945000 |
| C                       | 0.030475000  | -1.251086000 | 2.849376000  |
| C                       | 3.405064000  | -1.941849000 | 0.905119000  |

|   |              |              |              |
|---|--------------|--------------|--------------|
| C | 2.311600000  | 2.741645000  | -1.571772000 |
| C | -3.868231000 | -4.417902000 | 0.626998000  |
| C | 0.995337000  | -3.854981000 | 2.774564000  |
| C | 5.969826000  | -0.889134000 | 1.002893000  |
| C | 4.436558000  | 2.076107000  | -3.226558000 |
| C | -4.035130000 | -3.580001000 | -1.617663000 |
| C | 0.806062000  | -1.739707000 | 3.898103000  |
| C | 4.432126000  | -2.669955000 | 1.494648000  |
| C | 2.768516000  | 3.652327000  | -2.516805000 |
| C | -4.471835000 | -4.448551000 | -0.623912000 |
| C | 1.289636000  | -3.040040000 | 3.864668000  |
| C | 5.718525000  | -2.146841000 | 1.541404000  |
| C | 3.836690000  | 3.324048000  | -3.344405000 |
| H | -0.714480000 | 5.259823000  | 1.444580000  |
| H | -1.069085000 | 3.982115000  | 0.267621000  |
| H | -2.387632000 | 4.718197000  | 1.189245000  |
| H | -2.569457000 | 4.368258000  | 3.676545000  |
| H | -1.452769000 | 3.286569000  | 4.532751000  |
| H | -0.895990000 | 4.849031000  | 3.901657000  |
| H | -3.735552000 | 2.554215000  | 3.351505000  |
| H | 1.081456000  | 3.944405000  | 4.012126000  |
| H | -3.883576000 | -1.230650000 | 1.381024000  |
| H | 3.881538000  | 1.455691000  | 1.963778000  |
| H | -4.932415000 | 0.478862000  | 2.790312000  |
| H | 3.353429000  | 3.043252000  | 3.746539000  |
| H | -2.391486000 | -3.505571000 | 1.870867000  |
| H | 0.057139000  | -3.993329000 | 0.858207000  |
| H | 5.153534000  | 0.828750000  | 0.028732000  |
| H | 4.440377000  | 0.186628000  | -2.227289000 |
| H | -2.663618000 | -2.028553000 | -2.152280000 |
| H | -0.349365000 | -0.238703000 | 2.913908000  |
| H | 2.408949000  | -2.362735000 | 0.858780000  |

|    |              |              |              |
|----|--------------|--------------|--------------|
| H  | 1.472672000  | 3.017842000  | -0.942040000 |
| H  | -4.203629000 | -5.086659000 | 1.412095000  |
| H  | 1.366216000  | -4.873476000 | 2.738330000  |
| H  | 6.970150000  | -0.471382000 | 1.035819000  |
| H  | 5.264283000  | 1.805555000  | -3.873411000 |
| H  | -4.503871000 | -3.590404000 | -2.595525000 |
| H  | 1.026050000  | -1.095955000 | 4.742711000  |
| H  | 4.223554000  | -3.648950000 | 1.912793000  |
| H  | 2.286714000  | 4.620057000  | -2.604552000 |
| H  | -5.279065000 | -5.144935000 | -0.823295000 |
| H  | 1.892358000  | -3.419731000 | 4.682401000  |
| H  | 6.523729000  | -2.715253000 | 1.994177000  |
| H  | 4.196284000  | 4.036041000  | -4.079460000 |
| Ir | 0.435983000  | -1.049999000 | -1.420722000 |
| H  | -0.144957000 | 0.428075000  | -2.038188000 |
| H  | 1.058564000  | -2.501777000 | -0.960636000 |
| H  | -0.563612000 | -1.875651000 | -2.347496000 |
| H  | -1.539936000 | 0.405926000  | -2.176518000 |
| Cl | 1.968393000  | -1.202402000 | -3.436629000 |
| C  | -4.413954000 | 1.832210000  | -1.526081000 |
| F  | -5.028370000 | 2.357194000  | -2.595658000 |
| F  | -4.636536000 | 2.642570000  | -0.489877000 |
| F  | -4.983315000 | 0.655340000  | -1.265146000 |
| C  | -2.896355000 | 1.721843000  | -1.797245000 |
| O  | -2.556049000 | 0.532626000  | -2.186365000 |
| O  | -2.197582000 | 2.692650000  | -1.657197000 |

---

**E5c**

---

| Coordinates (Angstroms) |              |              |              |
|-------------------------|--------------|--------------|--------------|
|                         | X            | Y            | Z            |
| P                       | -1.945019000 | -0.169160000 | -0.064122000 |
| P                       | 1.900388000  | -0.578500000 | 0.009974000  |

---

|   |              |              |              |
|---|--------------|--------------|--------------|
| O | 0.341013000  | 1.733087000  | -0.635305000 |
| C | 0.538316000  | 4.435184000  | -0.150390000 |
| C | -0.829594000 | 3.778355000  | -0.341543000 |
| C | 1.391724000  | 3.439795000  | 0.640563000  |
| C | -0.851164000 | 2.394236000  | -0.511241000 |
| C | 1.274091000  | 2.099216000  | 0.294023000  |
| C | 1.198926000  | 4.642850000  | -1.531984000 |
| C | 0.426867000  | 5.783980000  | 0.558654000  |
| C | -2.009194000 | 1.633951000  | -0.481362000 |
| C | 2.068473000  | 1.081363000  | 0.797610000  |
| C | -2.053718000 | 4.433162000  | -0.315502000 |
| C | 2.331761000  | 3.752113000  | 1.616982000  |
| C | -3.222943000 | 2.329627000  | -0.492188000 |
| C | 3.013360000  | 1.432108000  | 1.762049000  |
| C | -3.241417000 | 3.714382000  | -0.441052000 |
| C | 3.123965000  | 2.753791000  | 2.179289000  |
| C | -3.377773000 | -0.722071000 | -1.084748000 |
| C | -2.610878000 | -0.085049000 | 1.657954000  |
| C | 3.201933000  | -1.494309000 | 0.949629000  |
| C | 2.759450000  | -0.272283000 | -1.600579000 |
| C | -4.671206000 | -0.878478000 | -0.591892000 |
| C | -3.074762000 | -1.264868000 | 2.250662000  |
| C | 4.520972000  | -1.559655000 | 0.499309000  |
| C | 2.823460000  | -1.319191000 | -2.524290000 |
| C | -3.140667000 | -0.931064000 | -2.445349000 |
| C | -2.544161000 | 1.073701000  | 2.431059000  |
| C | 2.878092000  | -2.086675000 | 2.172607000  |
| C | 3.388036000  | 0.933689000  | -1.910100000 |
| C | -5.707836000 | -1.254509000 | -1.442092000 |
| C | -3.492921000 | -1.273578000 | 3.573548000  |
| C | 5.491805000  | -2.217902000 | 1.248080000  |
| C | 3.490714000  | -1.160319000 | -3.730672000 |

|   |              |              |              |
|---|--------------|--------------|--------------|
| C | -4.176534000 | -1.295053000 | -3.294347000 |
| C | -2.947935000 | 1.058277000  | 3.763959000  |
| C | 3.850058000  | -2.733599000 | 2.924363000  |
| C | 4.044198000  | 1.097777000  | -3.126920000 |
| C | -5.464242000 | -1.463926000 | -2.792845000 |
| C | -3.431625000 | -0.110101000 | 4.336298000  |
| C | 5.160151000  | -2.806354000 | 2.461372000  |
| C | 4.098095000  | 0.053260000  | -4.039545000 |
| H | 2.191835000  | 5.084927000  | -1.408601000 |
| H | 1.307258000  | 3.699935000  | -2.073585000 |
| H | 0.589135000  | 5.318751000  | -2.138318000 |
| H | -0.161668000 | 6.483282000  | -0.039313000 |
| H | -0.041837000 | 5.685869000  | 1.541821000  |
| H | 1.415834000  | 6.229552000  | 0.687962000  |
| H | -2.096126000 | 5.508912000  | -0.193516000 |
| H | 2.465148000  | 4.778420000  | 1.938276000  |
| H | -4.160065000 | 1.784701000  | -0.490587000 |
| H | 3.667178000  | 0.680905000  | 2.188167000  |
| H | -4.189490000 | 4.239994000  | -0.445620000 |
| H | 3.852212000  | 3.014105000  | 2.938840000  |
| H | -4.884284000 | -0.707755000 | 0.456526000  |
| H | -3.094817000 | -2.183430000 | 1.673366000  |
| H | 4.806559000  | -1.098859000 | -0.438469000 |
| H | 2.344274000  | -2.264983000 | -2.300160000 |
| H | -2.137184000 | -0.816880000 | -2.841759000 |
| H | -2.167277000 | 1.998513000  | 2.010206000  |
| H | 1.858087000  | -2.045010000 | 2.535927000  |
| H | 3.380458000  | 1.759067000  | -1.208575000 |
| H | -6.708305000 | -1.379493000 | -1.041894000 |
| H | -3.861720000 | -2.194116000 | 4.013158000  |
| H | 6.509672000  | -2.268402000 | 0.876853000  |
| H | 3.530772000  | -1.984629000 | -4.434407000 |

|    |              |              |              |
|----|--------------|--------------|--------------|
| H  | -3.977339000 | -1.454666000 | -4.348551000 |
| H  | -2.884497000 | 1.968538000  | 4.350496000  |
| H  | 3.580957000  | -3.188190000 | 3.871638000  |
| H  | 4.517771000  | 2.046878000  | -3.353422000 |
| H  | -6.272326000 | -1.756697000 | -3.454535000 |
| H  | -3.752594000 | -0.119130000 | 5.372336000  |
| H  | 5.917025000  | -3.320423000 | 3.043914000  |
| H  | 4.609767000  | 0.181786000  | -4.987175000 |
| Ir | -0.051987000 | -1.702898000 | -0.146835000 |
| H  | -0.045000000 | -1.674596000 | -1.826381000 |
| H  | -0.076652000 | -1.843942000 | 1.516764000  |
| Cl | -1.790843000 | -3.572276000 | -0.247831000 |
| H  | 1.000647000  | -2.911910000 | -0.193507000 |

---

**TS<sub>E3c-E4c</sub>**

| Coordinates (Angstroms) |              |              |              |
|-------------------------|--------------|--------------|--------------|
|                         | X            | Y            | Z            |
| P                       | -1.101800000 | -1.442291000 | 0.192891000  |
| P                       | 2.164574000  | 0.275141000  | -0.236415000 |
| O                       | -0.434894000 | 1.427026000  | 0.589187000  |
| C                       | -1.262235000 | 3.241586000  | 2.472662000  |
| C                       | -2.121268000 | 2.019382000  | 2.145500000  |
| C                       | 0.194461000  | 2.764355000  | 2.439504000  |
| C                       | -1.606909000 | 1.116894000  | 1.219788000  |
| C                       | 0.546268000  | 1.871513000  | 1.428316000  |
| C                       | -1.457229000 | 4.311595000  | 1.376753000  |
| C                       | -1.632802000 | 3.844104000  | 3.827203000  |
| C                       | -2.156541000 | -0.133423000 | 0.967787000  |
| C                       | 1.826997000  | 1.377930000  | 1.222272000  |
| C                       | -3.342185000 | 1.702561000  | 2.727414000  |
| C                       | 1.202257000  | 3.163509000  | 3.307449000  |
| C                       | -3.396563000 | -0.407099000 | 1.549952000  |

|   |              |              |              |
|---|--------------|--------------|--------------|
| C | 2.814197000  | 1.815120000  | 2.109297000  |
| C | -3.993354000 | 0.517621000  | 2.395553000  |
| C | 2.501201000  | 2.688127000  | 3.141202000  |
| C | -2.404413000 | -2.670305000 | -0.243066000 |
| C | -0.285894000 | -2.161834000 | 1.681422000  |
| C | 3.614727000  | -0.663897000 | 0.394086000  |
| C | 2.870225000  | 1.534564000  | -1.382468000 |
| C | -2.845838000 | -3.642353000 | 0.656410000  |
| C | 0.220197000  | -3.463271000 | 1.597964000  |
| C | 4.908838000  | -0.139474000 | 0.468928000  |
| C | 3.948557000  | 1.246662000  | -2.219704000 |
| C | -3.048737000 | -2.550618000 | -1.476447000 |
| C | -0.024862000 | -1.409257000 | 2.824163000  |
| C | 3.375165000  | -1.936171000 | 0.912794000  |
| C | 2.230740000  | 2.770280000  | -1.508789000 |
| C | -3.892293000 | -4.494174000 | 0.317610000  |
| C | 0.963636000  | -4.000399000 | 2.638140000  |
| C | 5.936479000  | -0.877624000 | 1.042585000  |
| C | 4.399058000  | 2.186647000  | -3.139412000 |
| C | -4.100817000 | -3.393511000 | -1.808273000 |
| C | 0.745148000  | -1.939955000 | 3.856162000  |
| C | 4.400066000  | -2.669159000 | 1.499690000  |
| C | 2.675066000  | 3.704902000  | -2.436029000 |
| C | -4.521425000 | -4.372828000 | -0.914705000 |
| C | 1.239594000  | -3.233917000 | 3.767344000  |
| C | 5.684590000  | -2.142909000 | 1.562491000  |
| C | 3.765393000  | 3.418273000  | -3.250287000 |
| H | -0.815841000 | 5.173888000  | 1.581094000  |
| H | -1.214850000 | 3.924799000  | 0.385775000  |
| H | -2.498163000 | 4.647104000  | 1.366447000  |
| H | -2.667629000 | 4.193526000  | 3.819028000  |
| H | -1.516236000 | 3.120056000  | 4.638572000  |

|    |              |              |              |
|----|--------------|--------------|--------------|
| H  | -1.006480000 | 4.712551000  | 4.043267000  |
| H  | -3.795612000 | 2.374192000  | 3.446559000  |
| H  | 0.988755000  | 3.850876000  | 4.117287000  |
| H  | -3.889316000 | -1.353914000 | 1.367648000  |
| H  | 3.833834000  | 1.465805000  | 2.009587000  |
| H  | -4.957882000 | 0.294297000  | 2.836906000  |
| H  | 3.279337000  | 3.006607000  | 3.825551000  |
| H  | -2.384783000 | -3.740166000 | 1.631622000  |
| H  | 0.046006000  | -4.055806000 | 0.706448000  |
| H  | 5.122521000  | 0.851336000  | 0.085927000  |
| H  | 4.440880000  | 0.284474000  | -2.165456000 |
| H  | -2.733912000 | -1.790862000 | -2.180141000 |
| H  | -0.410869000 | -0.402229000 | 2.927366000  |
| H  | 2.379764000  | -2.358124000 | 0.857567000  |
| H  | 1.372263000  | 3.012667000  | -0.891499000 |
| H  | -4.216927000 | -5.249168000 | 1.025133000  |
| H  | 1.345814000  | -5.012117000 | 2.557790000  |
| H  | 6.935098000  | -0.457234000 | 1.089611000  |
| H  | 5.243394000  | 1.947955000  | -3.777206000 |
| H  | -4.590826000 | -3.284601000 | -2.769539000 |
| H  | 0.953203000  | -1.334887000 | 4.731772000  |
| H  | 4.191047000  | -3.653754000 | 1.904151000  |
| H  | 2.166375000  | 4.659041000  | -2.520423000 |
| H  | -5.337613000 | -5.036913000 | -1.177778000 |
| H  | 1.838028000  | -3.645666000 | 4.572582000  |
| H  | 6.487927000  | -2.714746000 | 2.014202000  |
| H  | 4.115071000  | 4.149502000  | -3.971055000 |
| Ir | 0.431088000  | -1.036917000 | -1.429277000 |
| H  | -0.082388000 | 0.500690000  | -2.059971000 |
| H  | 1.055345000  | -2.455836000 | -0.976520000 |
| H  | -0.534087000 | -1.886058000 | -2.368948000 |
| H  | -1.134091000 | 0.469743000  | -2.126198000 |



|    |              |              |              |
|----|--------------|--------------|--------------|
| Cl | 1.993011000  | -1.153856000 | -3.407406000 |
| C  | -4.142320000 | 2.006218000  | -1.499872000 |
| F  | -4.787218000 | 2.611537000  | -2.511498000 |
| F  | -4.307827000 | 2.765836000  | -0.410260000 |
| F  | -4.750259000 | 0.837908000  | -1.278150000 |
| C  | -2.639343000 | 1.857864000  | -1.846794000 |
| O  | -2.314452000 | 0.679913000  | -2.208657000 |
| O  | -1.943523000 | 2.852522000  | -1.764589000 |

---

**TS<sub>E5c-E1</sub>**

| Coordinates (Angstroms) |             |              |              |
|-------------------------|-------------|--------------|--------------|
|                         | X           | Y            | Z            |
| P                       | 1.817492000 | -0.408243000 | 1.426477000  |
| P                       | 0.019726000 | -0.478458000 | -1.600182000 |
| O                       | 1.281449000 | 1.749192000  | -0.443892000 |
| C                       | 3.007920000 | 3.674900000  | -1.257257000 |
| C                       | 2.986405000 | 3.242190000  | 0.214308000  |
| C                       | 2.884921000 | 2.371943000  | -2.063657000 |
| C                       | 2.151494000 | 2.175652000  | 0.524874000  |
| C                       | 1.936604000 | 1.468558000  | -1.614193000 |
| C                       | 1.784716000 | 4.564167000  | -1.571433000 |
| C                       | 4.285180000 | 4.436671000  | -1.601679000 |
| C                       | 2.292677000 | 1.374216000  | 1.649893000  |
| C                       | 1.601857000 | 0.273537000  | -2.227405000 |
| C                       | 3.833943000 | 3.687853000  | 1.221983000  |
| C                       | 3.605002000 | 1.996178000  | -3.193443000 |
| C                       | 3.151739000 | 1.851090000  | 2.644850000  |
| C                       | 2.333819000 | -0.071138000 | -3.360696000 |
| C                       | 3.862705000 | 3.030032000  | 2.449619000  |
| C                       | 3.339243000 | 0.778477000  | -3.818031000 |
| C                       | 2.258184000 | -1.095252000 | 3.072670000  |
| C                       | 3.243866000 | -0.947822000 | 0.366079000  |

|   |              |              |              |
|---|--------------|--------------|--------------|
| C | -0.222752000 | -1.830317000 | -2.819811000 |
| C | -0.998369000 | 0.929895000  | -2.263713000 |
| C | 3.083637000  | -2.209830000 | 3.198839000  |
| C | 3.198537000  | -2.219880000 | -0.207334000 |
| C | -1.292741000 | -1.877077000 | -3.710756000 |
| C | -1.679436000 | 1.802348000  | -1.421573000 |
| C | 1.720616000  | -0.514418000 | 4.224274000  |
| C | 4.349424000  | -0.137609000 | 0.096902000  |
| C | 0.710503000  | -2.870068000 | -2.830627000 |
| C | -0.918936000 | 1.239532000  | -3.628124000 |
| C | 3.368190000  | -2.736221000 | 4.455978000  |
| C | 4.210954000  | -2.662051000 | -1.048488000 |
| C | -1.418947000 | -2.934851000 | -4.605154000 |
| C | -2.283975000 | 2.950379000  | -1.929107000 |
| C | 2.017192000  | -1.030055000 | 5.477192000  |
| C | 5.353059000  | -0.571989000 | -0.761880000 |
| C | 0.589327000  | -3.921143000 | -3.728359000 |
| C | -1.534557000 | 2.372862000  | -4.136268000 |
| C | 2.839595000  | -2.146990000 | 5.596324000  |
| C | 5.285057000  | -1.831474000 | -1.343680000 |
| C | -0.476979000 | -3.954801000 | -4.621390000 |
| C | -2.219586000 | 3.235914000  | -3.284994000 |
| H | 1.777618000  | 4.824367000  | -2.633746000 |
| H | 0.843434000  | 4.061709000  | -1.336017000 |
| H | 1.836776000  | 5.487961000  | -0.988154000 |
| H | 4.341576000  | 5.367324000  | -1.032071000 |
| H | 5.180274000  | 3.845029000  | -1.389898000 |
| H | 4.290642000  | 4.703986000  | -2.661182000 |
| H | 4.501969000  | 4.523359000  | 1.049576000  |
| H | 4.374871000  | 2.643696000  | -3.596949000 |
| H | 3.320715000  | 1.282734000  | 3.549913000  |
| H | 2.123839000  | -0.988201000 | -3.897476000 |

|    |              |              |              |
|----|--------------|--------------|--------------|
| H  | 4.518480000  | 3.390357000  | 3.234036000  |
| H  | 3.912766000  | 0.494151000  | -4.693129000 |
| H  | 3.514427000  | -2.679812000 | 2.322987000  |
| H  | 2.351132000  | -2.862979000 | -0.005573000 |
| H  | -2.043382000 | -1.096602000 | -3.714177000 |
| H  | -1.737222000 | 1.593283000  | -0.361445000 |
| H  | 1.065384000  | 0.345343000  | 4.143672000  |
| H  | 4.443922000  | 0.846194000  | 0.536635000  |
| H  | 1.539721000  | -2.859229000 | -2.133749000 |
| H  | -0.356363000 | 0.605259000  | -4.303676000 |
| H  | 4.011413000  | -3.605604000 | 4.537675000  |
| H  | 4.147319000  | -3.652194000 | -1.486652000 |
| H  | -2.260013000 | -2.957999000 | -5.289397000 |
| H  | -2.800370000 | 3.623068000  | -1.253292000 |
| H  | 1.597044000  | -0.564807000 | 6.362153000  |
| H  | 6.189122000  | 0.084616000  | -0.976467000 |
| H  | 1.328081000  | -4.714944000 | -3.727394000 |
| H  | -1.464760000 | 2.589683000  | -5.196574000 |
| H  | 3.065072000  | -2.555327000 | 6.575553000  |
| H  | 6.064611000  | -2.164048000 | -2.020320000 |
| H  | -0.574201000 | -4.775276000 | -5.323974000 |
| H  | -2.689357000 | 4.130723000  | -3.678841000 |
| Ir | -0.276366000 | -1.111913000 | 0.608445000  |
| H  | -0.989663000 | 0.341787000  | 0.918284000  |
| H  | 0.342696000  | -2.652036000 | 0.346973000  |
| Cl | -0.914734000 | -1.733487000 | 2.934316000  |
| H  | -1.862665000 | -1.798498000 | 0.219666000  |
| C  | -4.912333000 | 3.762270000  | 0.630606000  |
| C  | -4.789862000 | 5.136533000  | 0.803268000  |
| C  | -3.719700000 | 5.669403000  | 1.508759000  |
| C  | -2.760922000 | 4.808413000  | 2.034281000  |
| C  | -2.888967000 | 3.450902000  | 1.837401000  |

|   |              |              |              |
|---|--------------|--------------|--------------|
| C | -3.955921000 | 2.869951000  | 1.136738000  |
| H | -5.766425000 | 3.371261000  | 0.091449000  |
| H | -5.549177000 | 5.791307000  | 0.390008000  |
| H | -3.621447000 | 6.739185000  | 1.649567000  |
| H | -1.898119000 | 5.178305000  | 2.576519000  |
| C | -4.279404000 | -0.327262000 | -0.658469000 |
| C | -4.838803000 | 0.995458000  | -0.161308000 |
| N | -4.005608000 | 1.500667000  | 0.913972000  |
| C | -3.807539000 | 0.585998000  | 2.046640000  |
| C | -4.450880000 | -0.762352000 | 1.752049000  |
| N | -4.069306000 | -1.270716000 | 0.438499000  |
| H | -4.957893000 | -0.749823000 | -1.405823000 |
| H | -4.796509000 | 1.691531000  | -1.000557000 |
| H | -2.745075000 | 0.439414000  | 2.239516000  |
| H | -4.164197000 | -1.460715000 | 2.530764000  |
| C | -2.351530000 | -4.107079000 | -1.366317000 |
| C | -3.277097000 | -2.913563000 | -1.163961000 |
| C | -3.257385000 | -2.334114000 | 0.242278000  |
| C | -3.241934000 | -3.385898000 | 1.335805000  |
| C | -2.326011000 | -4.575730000 | 1.074008000  |
| C | -2.552027000 | -5.180960000 | -0.305207000 |
| H | -2.521847000 | -4.509063000 | -2.368200000 |
| H | -3.060563000 | -2.144444000 | -1.901555000 |
| H | -2.975571000 | -2.941701000 | 2.290310000  |
| H | -1.285795000 | -4.248614000 | 1.161715000  |
| H | -3.567783000 | -5.591828000 | -0.372596000 |
| H | -4.318313000 | -3.225657000 | -1.325176000 |
| H | -4.281501000 | -3.733612000 | 1.402762000  |
| H | -2.498148000 | -5.317288000 | 1.859880000  |
| H | -1.857246000 | -6.009200000 | -0.474468000 |
| H | -1.314969000 | -3.764771000 | -1.328805000 |
| F | -1.903863000 | 2.648365000  | 2.308536000  |

|   |              |              |              |
|---|--------------|--------------|--------------|
| H | -5.895909000 | 0.893236000  | 0.123657000  |
| H | -3.313410000 | -0.140064000 | -1.138018000 |
| H | -5.541099000 | -0.678486000 | 1.778765000  |
| H | -4.272629000 | 0.990299000  | 2.954423000  |

---

**G1**

| Coordinates (Angstroms) |             |              |              |
|-------------------------|-------------|--------------|--------------|
|                         | X           | Y            | Z            |
| C                       | 2.319114000 | -3.461131000 | -0.888288000 |
| C                       | 2.959666000 | -4.054625000 | 0.234758000  |
| H                       | 2.593033000 | -4.897354000 | 0.802801000  |
| C                       | 4.140517000 | -3.311207000 | 0.511770000  |
| H                       | 4.828731000 | -3.493390000 | 1.324483000  |
| C                       | 3.107010000 | -2.354416000 | -1.305891000 |
| H                       | 2.882297000 | -1.693318000 | -2.126863000 |
| C                       | 4.231197000 | -2.257188000 | -0.439980000 |
| H                       | 5.006746000 | -1.506376000 | -0.485474000 |
| H                       | 1.383229000 | -3.776948000 | -1.327603000 |
| C                       | 0.576229000 | -1.577437000 | 1.208877000  |
| C                       | 1.263552000 | -2.225568000 | 2.280162000  |
| C                       | 2.433109000 | -1.489734000 | 2.599376000  |
| H                       | 3.170995000 | -1.762871000 | 3.339464000  |
| C                       | 1.335903000 | -0.398372000 | 0.878495000  |
| C                       | 2.490859000 | -0.376801000 | 1.732971000  |
| H                       | 3.269762000 | 0.370027000  | 1.722049000  |
| Fe                      | 2.487843000 | -2.101275000 | 0.640826000  |
| P                       | 0.744104000 | 1.086612000  | 0.009980000  |
| C                       | 1.214502000 | 2.374557000  | 1.258459000  |
| C                       | 1.099446000 | 3.824628000  | 0.746071000  |
| C                       | 0.462634000 | 2.206090000  | 2.583271000  |
| C                       | 0.947642000 | 4.821453000  | 1.909944000  |
| H                       | 1.999028000 | 4.066123000  | 0.170657000  |

|   |              |              |              |
|---|--------------|--------------|--------------|
| C | 1.144675000  | 3.033745000  | 3.685086000  |
| H | -0.571508000 | 2.537985000  | 2.447644000  |
| C | 1.724876000  | 4.354717000  | 3.140073000  |
| H | 1.285677000  | 5.811088000  | 1.589508000  |
| H | 1.944571000  | 2.443115000  | 4.143845000  |
| H | 2.775176000  | 4.212730000  | 2.859216000  |
| C | 1.834144000  | 1.460882000  | -1.425582000 |
| C | 1.419391000  | 0.639977000  | -2.663757000 |
| C | 3.342664000  | 1.379924000  | -1.189995000 |
| C | 2.519180000  | 0.647578000  | -3.741552000 |
| H | 1.183651000  | -0.390916000 | -2.379295000 |
| C | 4.090340000  | 2.057846000  | -2.356191000 |
| H | 3.625690000  | 1.853924000  | -0.246609000 |
| C | 3.324633000  | 1.944415000  | -3.688237000 |
| H | 3.205341000  | -0.193663000 | -3.591793000 |
| H | 5.079244000  | 1.599129000  | -2.458161000 |
| H | 4.023480000  | 1.999447000  | -4.527525000 |
| H | 0.249516000  | 3.929106000  | 0.067105000  |
| H | -0.111075000 | 4.924370000  | 2.174047000  |
| H | 1.713556000  | 5.122066000  | 3.919047000  |
| H | 0.414689000  | 3.241970000  | 4.473825000  |
| H | 0.415006000  | 1.156031000  | 2.883255000  |
| H | 2.271604000  | 2.182491000  | 1.458841000  |
| H | 1.583603000  | 2.510138000  | -1.621625000 |
| H | 0.498280000  | 1.068457000  | -3.072777000 |
| H | 2.068589000  | 0.507893000  | -4.728045000 |
| H | 2.637933000  | 2.791789000  | -3.798853000 |
| H | 4.255815000  | 3.114442000  | -2.122746000 |
| H | 3.633320000  | 0.330619000  | -1.110828000 |
| H | 0.986905000  | -3.158170000 | 2.744870000  |
| C | -0.623232000 | -2.182037000 | 0.495351000  |
| H | -0.297619000 | -2.359302000 | -0.533640000 |

|    |              |              |              |
|----|--------------|--------------|--------------|
| C  | -0.930027000 | -3.552557000 | 1.115027000  |
| H  | -0.080327000 | -4.221344000 | 0.948496000  |
| H  | -1.090900000 | -3.480620000 | 2.191218000  |
| H  | -1.804853000 | -4.024386000 | 0.685388000  |
| P  | -2.089591000 | -1.049915000 | 0.148405000  |
| C  | -2.891256000 | -1.920663000 | -1.353686000 |
| C  | -3.196011000 | -1.076624000 | 1.678637000  |
| C  | -2.905950000 | -3.453765000 | -1.372711000 |
| H  | -3.415786000 | -3.770692000 | -2.289857000 |
| H  | -1.902618000 | -3.883649000 | -1.399581000 |
| H  | -3.456785000 | -3.880341000 | -0.532361000 |
| C  | -2.057243000 | -1.454364000 | -2.562539000 |
| H  | -2.103426000 | -0.369454000 | -2.698300000 |
| H  | -1.006224000 | -1.747459000 | -2.476643000 |
| H  | -2.454090000 | -1.916763000 | -3.473218000 |
| C  | -4.338405000 | -1.443147000 | -1.529780000 |
| H  | -4.699392000 | -1.782809000 | -2.507857000 |
| H  | -4.999876000 | -1.871327000 | -0.773246000 |
| H  | -4.422569000 | -0.357569000 | -1.500059000 |
| C  | -4.250279000 | 0.033307000  | 1.560309000  |
| H  | -4.961267000 | -0.153687000 | 0.754720000  |
| H  | -4.812635000 | 0.078937000  | 2.500024000  |
| H  | -3.792970000 | 1.008620000  | 1.387178000  |
| C  | -3.917101000 | -2.403270000 | 1.947010000  |
| H  | -4.545911000 | -2.282234000 | 2.836756000  |
| H  | -4.571635000 | -2.688750000 | 1.121357000  |
| H  | -3.232283000 | -3.226413000 | 2.142424000  |
| C  | -2.280816000 | -0.731370000 | 2.864950000  |
| H  | -1.532976000 | -1.503496000 | 3.058225000  |
| H  | -1.761462000 | 0.217690000  | 2.705165000  |
| H  | -2.892494000 | -0.629202000 | 3.768128000  |
| Ir | -1.404123000 | 1.167417000  | -0.628103000 |

|    |              |             |              |
|----|--------------|-------------|--------------|
| Cl | -3.634731000 | 1.962206000 | -1.537067000 |
| H  | -0.934460000 | 2.612550000 | -1.183606000 |
| H  | -1.669858000 | 1.836767000 | 0.729218000  |

## G2

---

| Coordinates (Angstroms) |              |              |              |
|-------------------------|--------------|--------------|--------------|
|                         | X            | Y            | Z            |
| C                       | -3.440940000 | -2.634840000 | 0.825466000  |
| C                       | -3.970492000 | -3.196366000 | -0.369862000 |
| H                       | -3.710870000 | -4.157331000 | -0.789748000 |
| C                       | -4.856326000 | -2.245367000 | -0.948571000 |
| H                       | -5.385885000 | -2.360779000 | -1.883124000 |
| C                       | -4.009313000 | -1.342307000 | 0.986046000  |
| H                       | -3.810833000 | -0.662309000 | 1.797119000  |
| C                       | -4.878882000 | -1.095665000 | -0.109910000 |
| H                       | -5.440598000 | -0.189483000 | -0.284683000 |
| H                       | -2.717366000 | -3.097193000 | 1.481724000  |
| C                       | -0.929278000 | -1.496292000 | -1.051461000 |
| C                       | -1.591792000 | -2.050266000 | -2.184077000 |
| C                       | -2.452449000 | -1.065593000 | -2.737397000 |
| H                       | -3.114294000 | -1.207534000 | -3.579050000 |
| C                       | -1.388467000 | -0.146037000 | -0.914199000 |
| C                       | -2.341295000 | 0.106327000  | -1.954651000 |
| H                       | -2.868833000 | 1.034734000  | -2.115748000 |
| Fe                      | -2.972605000 | -1.461875000 | -0.793179000 |
| P                       | -0.527137000 | 1.114183000  | 0.024013000  |
| C                       | -0.667027000 | 2.628568000  | -1.018235000 |
| C                       | -0.019701000 | 3.825167000  | -0.281007000 |
| C                       | -0.071494000 | 2.490768000  | -2.424133000 |
| C                       | 0.425429000  | 4.921666000  | -1.262514000 |
| H                       | -0.738901000 | 4.236544000  | 0.433118000  |
| C                       | -0.488107000 | 3.699479000  | -3.278105000 |



|   |              |              |              |
|---|--------------|--------------|--------------|
| H | 1.018818000  | 2.451510000  | -2.346255000 |
| C | -0.531957000 | 5.000644000  | -2.450819000 |
| H | 0.477690000  | 5.879962000  | -0.738864000 |
| H | -1.470579000 | 3.513452000  | -3.723798000 |
| H | -1.546879000 | 5.168105000  | -2.071629000 |
| C | -1.409984000 | 1.585310000  | 1.566505000  |
| C | -1.325742000 | 0.510915000  | 2.651958000  |
| C | -2.852186000 | 2.061998000  | 1.301975000  |
| C | -1.892006000 | 1.025093000  | 3.995768000  |
| H | -1.860285000 | -0.383355000 | 2.324297000  |
| C | -3.697073000 | 2.077698000  | 2.591663000  |
| H | -2.812778000 | 3.070709000  | 0.881717000  |
| C | -2.820440000 | 2.236722000  | 3.830102000  |
| H | -2.443910000 | 0.213864000  | 4.480958000  |
| H | -4.264575000 | 1.145478000  | 2.684504000  |
| H | -3.437421000 | 2.354545000  | 4.725326000  |
| H | 0.846291000  | 3.486228000  | 0.304460000  |
| H | 1.436112000  | 4.708676000  | -1.627955000 |
| H | -0.291209000 | 5.859324000  | -3.083325000 |
| H | 0.220061000  | 3.804624000  | -4.105924000 |
| H | -0.384826000 | 1.563179000  | -2.907868000 |
| H | -1.741134000 | 2.812537000  | -1.125456000 |
| H | -0.821567000 | 2.441313000  | 1.917787000  |
| H | -0.285444000 | 0.216320000  | 2.786768000  |
| H | -1.069282000 | 1.288351000  | 4.667131000  |
| H | -2.227955000 | 3.154774000  | 3.737331000  |
| H | -4.434901000 | 2.882241000  | 2.531631000  |
| H | -3.334150000 | 1.424850000  | 0.554510000  |
| H | -1.502164000 | -3.062699000 | -2.544792000 |
| C | 0.023070000  | -2.224537000 | -0.129287000 |
| H | -0.336864000 | -2.072361000 | 0.893978000  |
| C | -0.036778000 | -3.726117000 | -0.440849000 |

|    |              |              |              |
|----|--------------|--------------|--------------|
| H  | -1.061102000 | -4.066476000 | -0.268286000 |
| H  | 0.208728000  | -3.931617000 | -1.482263000 |
| H  | 0.620062000  | -4.323205000 | 0.179870000  |
| P  | 1.738013000  | -1.443871000 | 0.000130000  |
| C  | 2.495157000  | -2.159761000 | 1.601220000  |
| C  | 2.710275000  | -1.921061000 | -1.546190000 |
| C  | 2.230204000  | -3.649276000 | 1.852430000  |
| H  | 2.776221000  | -3.926725000 | 2.760354000  |
| H  | 1.175348000  | -3.854495000 | 2.039455000  |
| H  | 2.589396000  | -4.290853000 | 1.046793000  |
| C  | 1.859606000  | -1.381557000 | 2.766331000  |
| H  | 2.024837000  | -0.299180000 | 2.695144000  |
| H  | 0.786803000  | -1.570785000 | 2.837404000  |
| H  | 2.318776000  | -1.719396000 | 3.700881000  |
| C  | 4.014264000  | -1.941843000 | 1.628263000  |
| H  | 4.374135000  | -2.228658000 | 2.621864000  |
| H  | 4.533327000  | -2.568420000 | 0.901383000  |
| H  | 4.294258000  | -0.902576000 | 1.460704000  |
| C  | 3.977970000  | -1.069093000 | -1.698754000 |
| H  | 4.638356000  | -1.126173000 | -0.834322000 |
| H  | 4.526762000  | -1.446200000 | -2.568278000 |
| H  | 3.741759000  | -0.020192000 | -1.878969000 |
| C  | 3.123796000  | -3.401294000 | -1.534358000 |
| H  | 3.566781000  | -3.631951000 | -2.508801000 |
| H  | 3.878626000  | -3.607529000 | -0.774304000 |
| H  | 2.288918000  | -4.082639000 | -1.383804000 |
| C  | 1.812493000  | -1.647820000 | -2.764332000 |
| H  | 0.989605000  | -2.358018000 | -2.844722000 |
| H  | 1.399800000  | -0.634843000 | -2.751997000 |
| H  | 2.424547000  | -1.746557000 | -3.666472000 |
| Ir | 1.712070000  | 0.792134000  | 0.366094000  |
| Cl | 4.082853000  | 1.480958000  | 0.686536000  |

H 1.842103000 0.950091000 -1.149679000

**G3**

---

| Coordinates (Angstroms) |              |              |              |
|-------------------------|--------------|--------------|--------------|
|                         | X            | Y            | Z            |
| C                       | -2.953815000 | -3.226670000 | 0.745998000  |
| C                       | -3.498918000 | -3.720862000 | -0.472198000 |
| H                       | -3.176421000 | -4.606472000 | -1.000362000 |
| C                       | -4.506037000 | -2.813273000 | -0.903504000 |
| H                       | -5.080215000 | -2.891028000 | -1.815357000 |
| C                       | -3.628417000 | -2.018972000 | 1.065228000  |
| H                       | -3.437319000 | -1.403122000 | 1.928061000  |
| C                       | -4.585266000 | -1.757221000 | 0.046865000  |
| H                       | -5.240177000 | -0.899497000 | -0.006651000 |
| H                       | -2.151180000 | -3.674198000 | 1.314495000  |
| C                       | -0.675484000 | -1.583596000 | -1.044106000 |
| C                       | -1.260086000 | -2.213083000 | -2.181207000 |
| C                       | -2.264439000 | -1.364785000 | -2.712343000 |
| H                       | -2.908238000 | -1.592626000 | -3.549029000 |
| C                       | -1.328338000 | -0.313652000 | -0.883532000 |
| C                       | -2.321536000 | -0.202001000 | -1.913602000 |
| H                       | -2.998249000 | 0.625499000  | -2.059356000 |
| Fe                      | -2.696124000 | -1.864029000 | -0.769704000 |
| P                       | -0.693372000 | 1.083230000  | 0.063976000  |
| C                       | -1.226562000 | 2.527264000  | -0.967899000 |
| C                       | -1.157684000 | 3.896771000  | -0.249470000 |
| C                       | -0.502221000 | 2.588104000  | -2.318487000 |
| C                       | -1.018095000 | 5.050697000  | -1.256944000 |
| H                       | -2.073463000 | 4.035010000  | 0.331071000  |
| C                       | -1.245098000 | 3.538973000  | -3.268978000 |
| H                       | 0.517443000  | 2.948340000  | -2.152927000 |
| C                       | -1.817920000 | 4.763334000  | -2.525822000 |

|   |              |              |              |
|---|--------------|--------------|--------------|
| H | -1.352849000 | 5.979743000  | -0.787634000 |
| H | -2.054762000 | 2.998870000  | -3.769838000 |
| H | -2.861139000 | 4.576960000  | -2.244979000 |
| C | -1.597084000 | 1.346328000  | 1.642140000  |
| C | -1.222524000 | 0.330903000  | 2.721470000  |
| C | -3.122343000 | 1.473166000  | 1.452458000  |
| C | -1.799990000 | 0.744017000  | 4.093702000  |
| H | -1.582513000 | -0.659666000 | 2.430861000  |
| C | -3.879809000 | 1.279415000  | 2.780362000  |
| H | -3.345011000 | 2.464487000  | 1.050290000  |
| C | -3.014538000 | 1.677533000  | 3.972522000  |
| H | -2.089680000 | -0.158474000 | 4.641115000  |
| H | -4.175590000 | 0.232157000  | 2.901248000  |
| H | -3.596546000 | 1.650932000  | 4.897823000  |
| H | -0.331390000 | 3.947241000  | 0.462801000  |
| H | 0.036287000  | 5.194374000  | -1.518541000 |
| H | -1.824161000 | 5.635747000  | -3.184660000 |
| H | -0.551757000 | 3.864453000  | -4.050716000 |
| H | -0.413916000 | 1.597850000  | -2.772900000 |
| H | -2.283256000 | 2.322035000  | -1.164333000 |
| H | -1.201863000 | 2.317986000  | 1.964554000  |
| H | -0.137526000 | 0.256132000  | 2.792742000  |
| H | -1.022464000 | 1.234530000  | 4.687097000  |
| H | -2.681495000 | 2.714192000  | 3.843515000  |
| H | -4.805680000 | 1.860478000  | 2.758266000  |
| H | -3.475650000 | 0.748585000  | 0.714972000  |
| H | -1.025075000 | -3.195653000 | -2.558171000 |
| C | 0.376666000  | -2.204898000 | -0.150155000 |
| H | 0.022529000  | -2.110953000 | 0.882129000  |
| C | 0.488726000  | -3.699114000 | -0.484285000 |
| H | -0.487016000 | -4.161638000 | -0.318845000 |
| H | 0.753123000  | -3.859862000 | -1.528687000 |

---

|    |             |              |              |
|----|-------------|--------------|--------------|
| H  | 1.213530000 | -4.224972000 | 0.125158000  |
| P  | 1.987344000 | -1.228652000 | -0.048952000 |
| C  | 2.854162000 | -1.863791000 | 1.527973000  |
| C  | 2.974644000 | -1.576709000 | -1.622688000 |
| C  | 2.741090000 | -3.369613000 | 1.790065000  |
| H  | 3.327767000 | -3.590973000 | 2.688051000  |
| H  | 1.713862000 | -3.676561000 | 1.993710000  |
| H  | 3.146869000 | -3.973911000 | 0.977364000  |
| C  | 2.174887000 | -1.142002000 | 2.703570000  |
| H  | 2.257611000 | -0.050480000 | 2.636583000  |
| H  | 1.120267000 | -1.411695000 | 2.786871000  |
| H  | 2.666982000 | -1.446673000 | 3.633168000  |
| C  | 4.343760000 | -1.497164000 | 1.516712000  |
| H  | 4.752190000 | -1.732148000 | 2.505507000  |
| H  | 4.905952000 | -2.080737000 | 0.786102000  |
| H  | 4.511622000 | -0.437860000 | 1.328620000  |
| C  | 4.125124000 | -0.576259000 | -1.786062000 |
| H  | 4.824815000 | -0.592576000 | -0.951796000 |
| H  | 4.674991000 | -0.848456000 | -2.693401000 |
| H  | 3.759955000 | 0.443919000  | -1.904670000 |
| C  | 3.562666000 | -2.995331000 | -1.648997000 |
| H  | 4.047848000 | -3.140417000 | -2.620115000 |
| H  | 4.323429000 | -3.135868000 | -0.879848000 |
| H  | 2.812953000 | -3.775670000 | -1.536035000 |
| C  | 2.023413000 | -1.388024000 | -2.815142000 |
| H  | 1.281728000 | -2.182550000 | -2.888702000 |
| H  | 1.501987000 | -0.426799000 | -2.775932000 |
| H  | 2.619472000 | -1.405425000 | -3.733268000 |
| Ir | 1.606578000 | 1.090398000  | 0.341615000  |
| Cl | 3.986830000 | 1.847882000  | 0.582376000  |
| H  | 1.671793000 | 1.267817000  | -1.180545000 |
| H  | 1.352161000 | 2.746811000  | 0.933838000  |

---

|   |             |             |             |
|---|-------------|-------------|-------------|
| H | 1.520883000 | 2.817357000 | 0.111569000 |
|---|-------------|-------------|-------------|

---

**TS<sub>G3-G1</sub>**

---

| Coordinates (Angstroms) |              |              |              |
|-------------------------|--------------|--------------|--------------|
|                         | X            | Y            | Z            |
| C                       | 5.684460000  | -0.971040000 | -0.522769000 |
| C                       | 6.146248000  | -1.826099000 | 0.516390000  |
| H                       | 6.361335000  | -2.880764000 | 0.422569000  |
| C                       | 6.224515000  | -1.060450000 | 1.712995000  |
| H                       | 6.511205000  | -1.433584000 | 2.685632000  |
| C                       | 5.474780000  | 0.316457000  | 0.032729000  |
| H                       | 5.114131000  | 1.175069000  | -0.508767000 |
| C                       | 5.804122000  | 0.265844000  | 1.416483000  |
| H                       | 5.730844000  | 1.080991000  | 2.121797000  |
| H                       | 5.501509000  | -1.251753000 | -1.549377000 |
| C                       | 2.506425000  | -1.753416000 | 0.250890000  |
| C                       | 3.118109000  | -2.744421000 | 1.067956000  |
| C                       | 3.279425000  | -2.209947000 | 2.372901000  |
| H                       | 3.749858000  | -2.705116000 | 3.209766000  |
| C                       | 2.272636000  | -0.596191000 | 1.057004000  |
| C                       | 2.776721000  | -0.888017000 | 2.368960000  |
| H                       | 2.778114000  | -0.224333000 | 3.219285000  |
| Fe                      | 4.302980000  | -1.078995000 | 1.004148000  |
| P                       | 1.130199000  | 0.757256000  | 0.631035000  |
| C                       | 0.701512000  | 1.336327000  | 2.331869000  |
| C                       | 0.011648000  | 2.705014000  | 2.332534000  |
| C                       | -0.155220000 | 0.328657000  | 3.101856000  |
| C                       | -0.781747000 | 2.957869000  | 3.628037000  |
| H                       | 0.753471000  | 3.495445000  | 2.193579000  |
| C                       | -0.210184000 | 0.705150000  | 4.592651000  |
| H                       | -1.158713000 | 0.337401000  | 2.668197000  |
| C                       | -0.145528000 | 2.228308000  | 4.808815000  |

|   |              |              |              |
|---|--------------|--------------|--------------|
| H | -0.842146000 | 4.033149000  | 3.816885000  |
| H | 0.617527000  | 0.223564000  | 5.123432000  |
| H | 0.898323000  | 2.549377000  | 4.904757000  |
| C | 2.015065000  | 2.179984000  | -0.114769000 |
| C | 2.362033000  | 1.935250000  | -1.587467000 |
| C | 3.179607000  | 2.787848000  | 0.679235000  |
| C | 2.657850000  | 3.276742000  | -2.289374000 |
| H | 3.220680000  | 1.259726000  | -1.652930000 |
| C | 4.019504000  | 3.727964000  | -0.207591000 |
| H | 2.771232000  | 3.355799000  | 1.519450000  |
| C | 3.163668000  | 4.351431000  | -1.309941000 |
| H | 3.402126000  | 3.114774000  | -3.075290000 |
| H | 4.844212000  | 3.180109000  | -0.676710000 |
| H | 3.730001000  | 5.112347000  | -1.853963000 |
| H | -0.657960000 | 2.745579000  | 1.479012000  |
| H | -1.811789000 | 2.603206000  | 3.511928000  |
| H | -0.641530000 | 2.498405000  | 5.745171000  |
| H | -1.134414000 | 0.305688000  | 5.022428000  |
| H | 0.217789000  | -0.690633000 | 2.993625000  |
| H | 1.670129000  | 1.438731000  | 2.830450000  |
| H | 1.208950000  | 2.915431000  | -0.117168000 |
| H | 1.530047000  | 1.426825000  | -2.095793000 |
| H | 1.750275000  | 3.638488000  | -2.783373000 |
| H | 2.311336000  | 4.867159000  | -0.850646000 |
| H | 4.479060000  | 4.502809000  | 0.412006000  |
| H | 3.806794000  | 2.006144000  | 1.109393000  |
| H | 3.437075000  | -3.724148000 | 0.746421000  |
| C | 2.165785000  | -1.896584000 | -1.201944000 |
| H | 2.418890000  | -0.948733000 | -1.686074000 |
| C | 3.045195000  | -2.985870000 | -1.835252000 |
| H | 4.007174000  | -2.997517000 | -1.323599000 |
| H | 2.622704000  | -3.986487000 | -1.764403000 |

|    |              |              |              |
|----|--------------|--------------|--------------|
| H  | 3.250203000  | -2.765471000 | -2.878560000 |
| P  | 0.283721000  | -1.910445000 | -1.438539000 |
| C  | 0.071341000  | -2.386468000 | -3.298871000 |
| C  | -0.499716000 | -3.231707000 | -0.315183000 |
| C  | 0.918759000  | -3.557299000 | -3.842959000 |
| H  | 0.464944000  | -3.855666000 | -4.793711000 |
| H  | 1.943509000  | -3.278144000 | -4.064571000 |
| H  | 0.922857000  | -4.435540000 | -3.199187000 |
| C  | 0.498521000  | -1.132593000 | -4.082832000 |
| H  | -0.139971000 | -0.274031000 | -3.876239000 |
| H  | 1.537785000  | -0.863815000 | -3.867219000 |
| H  | 0.434632000  | -1.351047000 | -5.154591000 |
| C  | -1.375682000 | -2.793025000 | -3.639463000 |
| H  | -1.514541000 | -2.652480000 | -4.717522000 |
| H  | -1.526840000 | -3.854352000 | -3.430466000 |
| H  | -2.137161000 | -2.216071000 | -3.130962000 |
| C  | -2.010599000 | -3.315313000 | -0.591326000 |
| H  | -2.241265000 | -3.857740000 | -1.505409000 |
| H  | -2.476124000 | -3.856050000 | 0.238032000  |
| H  | -2.472897000 | -2.327402000 | -0.643750000 |
| C  | 0.131754000  | -4.613600000 | -0.509363000 |
| H  | -0.369798000 | -5.320182000 | 0.161381000  |
| H  | 0.005501000  | -4.987090000 | -1.526443000 |
| H  | 1.194459000  | -4.619021000 | -0.256943000 |
| C  | -0.358923000 | -2.835037000 | 1.164588000  |
| H  | 0.672911000  | -2.742221000 | 1.493472000  |
| H  | -0.881866000 | -1.905160000 | 1.384431000  |
| H  | -0.827174000 | -3.624184000 | 1.762461000  |
| Ir | -0.567689000 | 0.290438000  | -0.886178000 |
| Cl | -2.364391000 | 0.050482000  | -2.540195000 |
| H  | -1.455697000 | 1.899867000  | -0.564875000 |
| H  | -1.396191000 | -0.353295000 | 0.227100000  |



|   |              |              |              |
|---|--------------|--------------|--------------|
| C | -2.651568000 | 2.909930000  | -0.662372000 |
| C | -2.716466000 | 3.205689000  | -2.145558000 |
| C | -1.406835000 | 3.761103000  | -2.701342000 |
| C | -0.965423000 | 5.020974000  | -1.964498000 |
| C | -0.854043000 | 4.748025000  | -0.468931000 |
| C | -2.116776000 | 4.118321000  | 0.103262000  |
| H | -3.004741000 | 2.322630000  | -2.705240000 |
| H | -0.627140000 | 2.993435000  | -2.620464000 |
| H | -0.006308000 | 5.376680000  | -2.353836000 |
| H | -0.009169000 | 4.082648000  | -0.292919000 |
| H | -2.942157000 | 4.838769000  | 0.014156000  |
| C | -3.662814000 | 2.058706000  | 1.369649000  |
| C | -4.830517000 | 1.690396000  | -0.767286000 |
| C | -4.621823000 | 0.947869000  | 1.767946000  |
| H | -2.646982000 | 1.744117000  | 1.630013000  |
| C | -5.038051000 | 0.196496000  | -0.475838000 |
| H | -5.716123000 | 2.248337000  | -0.444360000 |
| H | -4.380065000 | 0.633043000  | 2.778784000  |
| H | -4.549026000 | -0.406999000 | -1.239777000 |
| H | -3.508272000 | 3.956937000  | -2.265730000 |
| H | -1.540895000 | 3.965134000  | -3.767225000 |
| H | -1.699215000 | 5.817329000  | -2.139896000 |
| H | -0.644591000 | 5.670478000  | 0.080047000  |
| H | -2.008770000 | 3.927666000  | 1.166070000  |
| H | -4.737932000 | 1.833825000  | -1.838729000 |
| H | -3.901761000 | 2.974448000  | 1.920060000  |
| H | -5.662235000 | 1.302767000  | 1.778988000  |
| H | -6.122043000 | 0.007739000  | -0.516261000 |
| C | -4.580498000 | -1.473222000 | 1.239221000  |
| C | -3.853288000 | -1.952608000 | 2.339302000  |
| C | -5.340380000 | -2.430977000 | 0.552957000  |
| C | -3.891711000 | -3.260085000 | 2.767081000  |

|   |              |              |              |
|---|--------------|--------------|--------------|
| C | -5.377070000 | -3.761540000 | 0.958608000  |
| H | -5.911100000 | -2.134655000 | -0.317302000 |
| C | -4.666669000 | -4.184236000 | 2.072024000  |
| H | -3.298090000 | -3.544452000 | 3.628395000  |
| H | -5.978242000 | -4.466103000 | 0.394672000  |
| H | -4.698713000 | -5.217883000 | 2.395129000  |
| F | -3.036447000 | -1.098123000 | 3.005926000  |
| N | -3.690256000 | 2.277878000  | -0.076068000 |
| N | -4.474375000 | -0.149410000 | 0.819732000  |

---

**TS<sub>G3-G1</sub>**

| Coordinates (Angstroms) |              |              |              |
|-------------------------|--------------|--------------|--------------|
|                         | X            | Y            | Z            |
| C                       | -3.582328000 | -2.220671000 | -2.227233000 |
| C                       | -4.780907000 | -2.426385000 | -1.489057000 |
| H                       | -5.673303000 | -1.819655000 | -1.542116000 |
| C                       | -4.579965000 | -3.537691000 | -0.623465000 |
| H                       | -5.293953000 | -3.919726000 | 0.091713000  |
| C                       | -2.648254000 | -3.210358000 | -1.821615000 |
| H                       | -1.648625000 | -3.323644000 | -2.205429000 |
| C                       | -3.256755000 | -4.021119000 | -0.825891000 |
| H                       | -2.791406000 | -4.846159000 | -0.306178000 |
| H                       | -3.405290000 | -1.439438000 | -2.952579000 |
| C                       | -2.642678000 | -0.113771000 | 0.196025000  |
| C                       | -3.898031000 | -0.413197000 | 0.803504000  |
| C                       | -3.730749000 | -1.498101000 | 1.700672000  |
| H                       | -4.513192000 | -1.972820000 | 2.274419000  |
| C                       | -1.682698000 | -1.031152000 | 0.742437000  |
| C                       | -2.375853000 | -1.894808000 | 1.653800000  |
| H                       | -1.941169000 | -2.705232000 | 2.218115000  |
| Fe                      | -3.232093000 | -2.051723000 | -0.207155000 |
| P                       | 0.113341000  | -0.826196000 | 0.693581000  |

|   |              |              |              |
|---|--------------|--------------|--------------|
| C | 0.652389000  | -1.617358000 | 2.279508000  |
| C | 2.168424000  | -1.938239000 | 2.333829000  |
| C | 0.213168000  | -0.801613000 | 3.501907000  |
| C | 2.725342000  | -1.821100000 | 3.758400000  |
| H | 2.321546000  | -2.961493000 | 1.980363000  |
| C | 0.424792000  | -1.603340000 | 4.793165000  |
| H | 0.797025000  | 0.122210000  | 3.536553000  |
| C | 1.741641000  | -2.408427000 | 4.768632000  |
| H | 3.688461000  | -2.336729000 | 3.810552000  |
| H | -0.420097000 | -2.283065000 | 4.944794000  |
| H | 1.538287000  | -3.448334000 | 4.486607000  |
| C | 0.855719000  | -1.895012000 | -0.609125000 |
| C | 0.485891000  | -1.408785000 | -2.012039000 |
| C | 0.580223000  | -3.397866000 | -0.423537000 |
| C | 1.301095000  | -2.146566000 | -3.097876000 |
| H | -0.585965000 | -1.551272000 | -2.167216000 |
| C | 0.944858000  | -4.207221000 | -1.689251000 |
| H | 1.166753000  | -3.765257000 | 0.420614000  |
| C | 1.923996000  | -3.451679000 | -2.584835000 |
| H | 0.646955000  | -2.369349000 | -3.947162000 |
| H | 0.043656000  | -4.428212000 | -2.271159000 |
| H | 2.224911000  | -4.075798000 | -3.431411000 |
| H | 2.748994000  | -1.297384000 | 1.670538000  |
| H | 2.919874000  | -0.770030000 | 4.000310000  |
| H | 2.186012000  | -2.440307000 | 5.767157000  |
| H | 0.423401000  | -0.907346000 | 5.637654000  |
| H | -0.835209000 | -0.502745000 | 3.418132000  |
| H | 0.115661000  | -2.570314000 | 2.301172000  |
| H | 1.929241000  | -1.723195000 | -0.469253000 |
| H | 0.664812000  | -0.337587000 | -2.085397000 |
| H | 2.091585000  | -1.490707000 | -3.472294000 |
| H | 2.838085000  | -3.233987000 | -2.021934000 |

|   |              |              |              |
|---|--------------|--------------|--------------|
| H | 1.362888000  | -5.173929000 | -1.395787000 |
| H | -0.470700000 | -3.559202000 | -0.169809000 |
| H | -4.839628000 | 0.068505000  | 0.594374000  |
| C | -2.423891000 | 0.948672000  | -0.862987000 |
| H | -1.892666000 | 0.475696000  | -1.696581000 |
| C | -3.793504000 | 1.415836000  | -1.373640000 |
| H | -4.316698000 | 0.555231000  | -1.798446000 |
| H | -4.412236000 | 1.810348000  | -0.568439000 |
| H | -3.730398000 | 2.175520000  | -2.142143000 |
| P | -1.172935000 | 2.277266000  | -0.371585000 |
| C | -0.731265000 | 3.174629000  | -2.000064000 |
| C | -2.044781000 | 3.439244000  | 0.843720000  |
| C | -1.871462000 | 3.410571000  | -2.996713000 |
| H | -1.464431000 | 3.995560000  | -3.828799000 |
| H | -2.251158000 | 2.478395000  | -3.418096000 |
| H | -2.699643000 | 3.979617000  | -2.571717000 |
| C | 0.309271000  | 2.283101000  | -2.695155000 |
| H | 1.176107000  | 2.082776000  | -2.058408000 |
| H | -0.126015000 | 1.330019000  | -3.005315000 |
| H | 0.666757000  | 2.790661000  | -3.597468000 |
| C | -0.086051000 | 4.535482000  | -1.701023000 |
| H | 0.326687000  | 4.925509000  | -2.638065000 |
| H | -0.812763000 | 5.264699000  | -1.339340000 |
| H | 0.728332000  | 4.460369000  | -0.982317000 |
| C | -1.029911000 | 4.332324000  | 1.571630000  |
| H | -0.431674000 | 4.942499000  | 0.896669000  |
| H | -1.590445000 | 5.005892000  | 2.229537000  |
| H | -0.348334000 | 3.746727000  | 2.189628000  |
| C | -3.091548000 | 4.343662000  | 0.176638000  |
| H | -3.626240000 | 4.883827000  | 0.966016000  |
| H | -2.633753000 | 5.089517000  | -0.474274000 |
| H | -3.830808000 | 3.792966000  | -0.402358000 |

|    |              |              |              |
|----|--------------|--------------|--------------|
| C  | -2.734960000 | 2.573075000  | 1.910490000  |
| H  | -3.629534000 | 2.080961000  | 1.530157000  |
| H  | -2.065222000 | 1.811604000  | 2.321280000  |
| H  | -3.042788000 | 3.224584000  | 2.735163000  |
| Ir | 0.837738000  | 1.334307000  | 0.513113000  |
| Cl | 2.211434000  | 3.468243000  | 0.669346000  |
| H  | 0.222765000  | 1.546995000  | 1.902457000  |
| H  | 2.801618000  | 0.683058000  | 0.802875000  |
| H  | 2.115838000  | 0.767107000  | 1.463895000  |
| C  | 3.931247000  | 0.054446000  | -0.934719000 |
| O  | 3.992737000  | 0.276636000  | 0.309551000  |
| O  | 3.141297000  | 0.494988000  | -1.757895000 |
| C  | 5.014677000  | -0.943997000 | -1.414561000 |
| F  | 4.879179000  | -2.122436000 | -0.779318000 |
| F  | 6.247238000  | -0.488972000 | -1.150077000 |
| F  | 4.941368000  | -1.182981000 | -2.724653000 |

---

## H1

| Coordinates (Angstroms) |              |              |              |
|-------------------------|--------------|--------------|--------------|
|                         | X            | Y            | Z            |
| C                       | -3.825196000 | 0.323527000  | -2.733597000 |
| C                       | -4.997180000 | 0.867472000  | -2.137155000 |
| H                       | -5.312911000 | 1.899795000  | -2.181996000 |
| C                       | -5.652849000 | -0.174932000 | -1.423979000 |
| H                       | -6.553502000 | -0.070227000 | -0.836347000 |
| C                       | -3.766141000 | -1.054547000 | -2.395258000 |
| H                       | -2.999169000 | -1.743871000 | -2.703169000 |
| C                       | -4.887578000 | -1.364834000 | -1.579247000 |
| H                       | -5.108828000 | -2.327577000 | -1.141669000 |
| H                       | -3.097018000 | 0.865258000  | -3.320358000 |
| C                       | -2.198116000 | 1.260083000  | 0.038260000  |
| C                       | -3.458875000 | 1.733707000  | 0.506869000  |

|    |              |              |              |
|----|--------------|--------------|--------------|
| C  | -4.098333000 | 0.700571000  | 1.238873000  |
| H  | -5.080214000 | 0.752796000  | 1.686297000  |
| C  | -2.055096000 | -0.094128000 | 0.499076000  |
| C  | -3.248316000 | -0.429538000 | 1.220623000  |
| H  | -3.461802000 | -1.379259000 | 1.686380000  |
| Fe | -3.762225000 | 0.116273000  | -0.689610000 |
| P  | -0.485677000 | -1.016854000 | 0.620278000  |
| C  | -0.848103000 | -2.223371000 | 1.986010000  |
| C  | 0.219469000  | -3.340304000 | 2.093818000  |
| C  | -1.033572000 | -1.544410000 | 3.348615000  |
| C  | 0.333515000  | -3.890547000 | 3.524011000  |
| H  | -0.048020000 | -4.158271000 | 1.419758000  |
| C  | -1.625641000 | -2.535967000 | 4.361413000  |
| H  | -0.059018000 | -1.189555000 | 3.694410000  |
| C  | -1.038399000 | -3.953030000 | 4.192113000  |
| H  | 0.797375000  | -4.880728000 | 3.493709000  |
| H  | -2.714382000 | -2.571547000 | 4.246700000  |
| H  | -1.702204000 | -4.561426000 | 3.566191000  |
| C  | -0.286070000 | -2.116198000 | -0.845049000 |
| C  | -0.103235000 | -1.339851000 | -2.152293000 |
| C  | -1.354323000 | -3.212778000 | -1.003353000 |
| C  | 0.453398000  | -2.264367000 | -3.255920000 |
| H  | -1.064952000 | -0.917769000 | -2.454542000 |
| C  | -1.261301000 | -3.891870000 | -2.388922000 |
| H  | -1.212633000 | -3.969953000 | -0.229956000 |
| C  | 0.134043000  | -3.743818000 | -2.993336000 |
| H  | 0.031869000  | -1.964978000 | -4.221331000 |
| H  | -1.984030000 | -3.451084000 | -3.084766000 |
| H  | 0.211829000  | -4.314396000 | -3.923364000 |
| H  | 1.196453000  | -2.974185000 | 1.772286000  |
| H  | 0.997738000  | -3.253941000 | 4.119613000  |
| H  | -0.976928000 | -4.456855000 | 5.160892000  |

|   |              |              |              |
|---|--------------|--------------|--------------|
| H | -1.428390000 | -2.164891000 | 5.372318000  |
| H | -1.672697000 | -0.661357000 | 3.276892000  |
| H | -1.798554000 | -2.690948000 | 1.707562000  |
| H | 0.669230000  | -2.599333000 | -0.616008000 |
| H | 0.571092000  | -0.499344000 | -2.002197000 |
| H | 1.536577000  | -2.136230000 | -3.335361000 |
| H | 0.875540000  | -4.166223000 | -2.305053000 |
| H | -1.532123000 | -4.947403000 | -2.296699000 |
| H | -2.354112000 | -2.796080000 | -0.852333000 |
| H | -3.887499000 | 2.703530000  | 0.308494000  |
| C | -1.245958000 | 2.062244000  | -0.825590000 |
| H | -0.952931000 | 1.413014000  | -1.656424000 |
| C | -1.981465000 | 3.271350000  | -1.411490000 |
| H | -2.864580000 | 2.926239000  | -1.955922000 |
| H | -2.322993000 | 3.958319000  | -0.636487000 |
| H | -1.366114000 | 3.834494000  | -2.103928000 |
| P | 0.444015000  | 2.373617000  | -0.028943000 |
| C | 1.514829000  | 3.041851000  | -1.472479000 |
| C | 0.187519000  | 3.760805000  | 1.263506000  |
| C | 1.029117000  | 4.242255000  | -2.305308000 |
| H | 1.886416000  | 4.608549000  | -2.882392000 |
| H | 0.270926000  | 3.948407000  | -3.032387000 |
| H | 0.649343000  | 5.077941000  | -1.723874000 |
| C | 1.711473000  | 1.890724000  | -2.470420000 |
| H | 2.170332000  | 1.019135000  | -2.010099000 |
| H | 0.769453000  | 1.593189000  | -2.940208000 |
| H | 2.373979000  | 2.240148000  | -3.271352000 |
| C | 2.881075000  | 3.404432000  | -0.869544000 |
| H | 3.604154000  | 3.534209000  | -1.683068000 |
| H | 2.836566000  | 4.347168000  | -0.317911000 |
| H | 3.257302000  | 2.630274000  | -0.197203000 |
| C | 1.374255000  | 3.791462000  | 2.235994000  |

|    |              |              |              |
|----|--------------|--------------|--------------|
| H  | 2.327054000  | 3.967026000  | 1.737250000  |
| H  | 1.210888000  | 4.607190000  | 2.950546000  |
| H  | 1.464746000  | 2.859703000  | 2.792427000  |
| C  | 0.026195000  | 5.175739000  | 0.694004000  |
| H  | -0.246843000 | 5.846719000  | 1.517192000  |
| H  | 0.961244000  | 5.549287000  | 0.271927000  |
| H  | -0.754052000 | 5.252650000  | -0.062867000 |
| C  | -1.063973000 | 3.420800000  | 2.087718000  |
| H  | -1.985356000 | 3.608041000  | 1.536834000  |
| H  | -1.068149000 | 2.382091000  | 2.428491000  |
| H  | -1.077062000 | 4.061741000  | 2.976728000  |
| Ir | 1.304116000  | 0.281312000  | 1.045340000  |
| Cl | 3.535325000  | 1.189732000  | 1.947976000  |
| H  | 0.517498000  | 0.749869000  | 2.308997000  |
| O  | 2.696559000  | -0.473560000 | -0.670168000 |
| C  | 3.182874000  | -1.610490000 | -0.842351000 |
| C  | 4.200393000  | -1.667387000 | -2.016877000 |
| O  | 3.019389000  | -2.665797000 | -0.226633000 |
| F  | 5.440106000  | -1.384584000 | -1.569116000 |
| F  | 3.929272000  | -0.789889000 | -2.994885000 |
| F  | 4.253134000  | -2.881793000 | -2.582610000 |
| H  | 1.783952000  | -0.997065000 | 1.881974000  |

---

## H2

---

| Coordinates (Angstroms) |             |              |              |
|-------------------------|-------------|--------------|--------------|
|                         | X           | Y            | Z            |
| C                       | 3.126318000 | 0.854971000  | -2.682132000 |
| C                       | 3.679785000 | -0.157242000 | -3.515241000 |
| H                       | 3.368530000 | -0.390332000 | -4.523326000 |
| C                       | 4.674603000 | -0.848051000 | -2.768574000 |
| H                       | 5.252967000 | -1.693276000 | -3.112922000 |
| C                       | 3.784110000 | 0.791405000  | -1.423648000 |



|    |              |              |              |
|----|--------------|--------------|--------------|
| H  | 3.573219000  | 1.413500000  | -0.568817000 |
| C  | 4.739425000  | -0.261046000 | -1.474081000 |
| H  | 5.383695000  | -0.574946000 | -0.665330000 |
| H  | 2.322154000  | 1.527339000  | -2.943717000 |
| C  | 0.830522000  | -1.307607000 | -1.765082000 |
| C  | 1.458129000  | -2.285513000 | -2.587744000 |
| C  | 2.400446000  | -3.006830000 | -1.809707000 |
| H  | 3.057536000  | -3.784778000 | -2.170264000 |
| C  | 1.398272000  | -1.436815000 | -0.449551000 |
| C  | 2.373253000  | -2.485732000 | -0.496408000 |
| H  | 2.977029000  | -2.820194000 | 0.334101000  |
| Fe | 2.851351000  | -0.995045000 | -1.840703000 |
| P  | 0.705315000  | -0.714628000 | 1.047310000  |
| C  | 0.592390000  | -2.117468000 | 2.273102000  |
| C  | -0.093743000 | -1.612047000 | 3.582374000  |
| C  | -0.039026000 | -3.422459000 | 1.787074000  |
| C  | -1.350326000 | -2.407007000 | 3.933199000  |
| H  | 0.622046000  | -1.685391000 | 4.407456000  |
| C  | -0.124006000 | -4.413453000 | 2.949729000  |
| H  | -1.042033000 | -3.244246000 | 1.393467000  |
| C  | -1.062467000 | -3.905622000 | 4.067692000  |
| H  | -1.775330000 | -2.019146000 | 4.863689000  |
| H  | 0.885543000  | -4.565952000 | 3.348235000  |
| H  | -0.609856000 | -4.102362000 | 5.045023000  |
| C  | 1.976117000  | 0.276870000  | 2.011192000  |
| C  | 1.973872000  | 1.795983000  | 1.858090000  |
| C  | 3.402988000  | -0.309262000 | 1.888584000  |
| C  | 2.804481000  | 2.454542000  | 2.978110000  |
| H  | 2.359156000  | 2.083617000  | 0.879447000  |
| C  | 4.479383000  | 0.719249000  | 2.266106000  |
| H  | 3.489237000  | -1.178000000 | 2.548437000  |
| C  | 4.007117000  | 1.599924000  | 3.417680000  |

|   |              |              |              |
|---|--------------|--------------|--------------|
| H | 3.152066000  | 3.429161000  | 2.620960000  |
| H | 4.710095000  | 1.353031000  | 1.402011000  |
| H | 4.816212000  | 2.242074000  | 3.776602000  |
| H | -0.364199000 | -0.552638000 | 3.510001000  |
| H | -2.106125000 | -2.241227000 | 3.158394000  |
| H | -2.009242000 | -4.453756000 | 4.046794000  |
| H | -0.462025000 | -5.385222000 | 2.579531000  |
| H | 0.556150000  | -3.848570000 | 0.976314000  |
| H | 1.638870000  | -2.346516000 | 2.498008000  |
| H | 1.634275000  | 0.092952000  | 3.034640000  |
| H | 0.955554000  | 2.169289000  | 1.920714000  |
| H | 2.159327000  | 2.650441000  | 3.840622000  |
| H | 3.723183000  | 0.955378000  | 4.258338000  |
| H | 5.404013000  | 0.194486000  | 2.523524000  |
| H | 3.592430000  | -0.657978000 | 0.875857000  |
| H | 1.276914000  | -2.438002000 | -3.640300000 |
| C | -0.205289000 | -0.314633000 | -2.244203000 |
| H | 0.110249000  | 0.675255000  | -1.903601000 |
| C | -0.242772000 | -0.290541000 | -3.772964000 |
| H | 0.784969000  | -0.265549000 | -4.142368000 |
| H | -0.734919000 | -1.164500000 | -4.203067000 |
| H | -0.731022000 | 0.604400000  | -4.142477000 |
| P | -1.835929000 | -0.452173000 | -1.314341000 |
| C | -3.091397000 | 0.759816000  | -2.137188000 |
| C | -2.553095000 | -2.214528000 | -1.496637000 |
| C | -3.190019000 | 0.683820000  | -3.679355000 |
| H | -4.186726000 | 1.040893000  | -3.957405000 |
| H | -2.474303000 | 1.354282000  | -4.153354000 |
| H | -3.066505000 | -0.304908000 | -4.109257000 |
| C | -2.695220000 | 2.203504000  | -1.804405000 |
| H | -2.807252000 | 2.425745000  | -0.745400000 |
| H | -1.670944000 | 2.422549000  | -2.113239000 |

|    |              |              |              |
|----|--------------|--------------|--------------|
| H  | -3.359708000 | 2.869443000  | -2.365302000 |
| C  | -4.499084000 | 0.512374000  | -1.567270000 |
| H  | -5.129279000 | 1.353197000  | -1.876621000 |
| H  | -4.958154000 | -0.394652000 | -1.959874000 |
| H  | -4.511247000 | 0.477459000  | -0.479924000 |
| C  | -3.567690000 | -2.498135000 | -0.376191000 |
| H  | -4.332812000 | -1.729336000 | -0.276272000 |
| H  | -4.070225000 | -3.442907000 | -0.608184000 |
| H  | -3.077998000 | -2.614744000 | 0.591480000  |
| C  | -3.236208000 | -2.448511000 | -2.854539000 |
| H  | -3.514278000 | -3.507006000 | -2.896689000 |
| H  | -4.147974000 | -1.870668000 | -2.995300000 |
| H  | -2.560526000 | -2.261197000 | -3.690699000 |
| C  | -1.434868000 | -3.260748000 | -1.406921000 |
| H  | -0.875406000 | -3.322400000 | -2.340075000 |
| H  | -0.735056000 | -3.071258000 | -0.601038000 |
| H  | -1.897405000 | -4.237253000 | -1.228390000 |
| Ir | -1.398599000 | 0.227973000  | 0.834595000  |
| Cl | -3.590712000 | 1.021922000  | 1.714539000  |
| H  | -1.837583000 | -1.203038000 | 1.208805000  |
| O  | -0.961107000 | 2.495048000  | 0.712778000  |
| C  | -0.165026000 | 3.073462000  | -0.066647000 |
| C  | -0.149417000 | 4.608472000  | 0.151821000  |
| O  | 0.573938000  | 2.618722000  | -0.935736000 |
| F  | 0.248493000  | 4.911547000  | 1.401475000  |
| F  | -1.376120000 | 5.133832000  | -0.011830000 |
| F  | 0.670852000  | 5.242072000  | -0.690800000 |

---

### H3

---

| Coordinates (Angstroms) |              |              |              |
|-------------------------|--------------|--------------|--------------|
|                         | X            | Y            | Z            |
| C                       | -4.014414000 | -0.070578000 | -2.571539000 |

---

|    |              |              |              |
|----|--------------|--------------|--------------|
| C  | -5.204841000 | 0.343524000  | -1.911148000 |
| H  | -5.644431000 | 1.329562000  | -1.951422000 |
| C  | -5.686589000 | -0.752544000 | -1.142344000 |
| H  | -6.553332000 | -0.741272000 | -0.497322000 |
| C  | -3.767366000 | -1.421908000 | -2.212370000 |
| H  | -2.938736000 | -2.018858000 | -2.552177000 |
| C  | -4.793068000 | -1.845209000 | -1.324304000 |
| H  | -4.870811000 | -2.816169000 | -0.856925000 |
| H  | -3.392916000 | 0.540428000  | -3.210306000 |
| C  | -2.322294000 | 1.080767000  | 0.074080000  |
| C  | -3.591918000 | 1.466789000  | 0.591427000  |
| C  | -4.100605000 | 0.411816000  | 1.391582000  |
| H  | -5.060538000 | 0.396535000  | 1.886321000  |
| C  | -2.042939000 | -0.235671000 | 0.568749000  |
| C  | -3.161833000 | -0.644709000 | 1.368161000  |
| H  | -3.272011000 | -1.591728000 | 1.873270000  |
| Fe | -3.805199000 | -0.220280000 | -0.532654000 |
| P  | -0.407238000 | -1.001196000 | 0.609373000  |
| C  | -0.536804000 | -2.141097000 | 2.066273000  |
| C  | 0.611398000  | -3.180264000 | 2.153090000  |
| C  | -0.689672000 | -1.388339000 | 3.395542000  |
| C  | 0.887391000  | -3.599056000 | 3.604661000  |
| H  | 0.327477000  | -4.066310000 | 1.579818000  |
| C  | -1.119690000 | -2.355839000 | 4.507365000  |
| H  | 0.265955000  | -0.926626000 | 3.656120000  |
| C  | -0.420471000 | -3.725406000 | 4.383033000  |
| H  | 1.433584000  | -4.546470000 | 3.606270000  |
| H  | -2.205701000 | -2.491255000 | 4.475316000  |
| H  | -1.071599000 | -4.429382000 | 3.851453000  |
| C  | -0.136512000 | -2.133852000 | -0.810292000 |
| C  | -0.073381000 | -1.404041000 | -2.153236000 |
| C  | -1.116708000 | -3.321379000 | -0.866217000 |

|   |              |              |              |
|---|--------------|--------------|--------------|
| C | 0.499930000  | -2.333001000 | -3.243518000 |
| H | -1.077170000 | -1.066538000 | -2.422484000 |
| C | -1.055008000 | -4.037339000 | -2.233439000 |
| H | -0.863215000 | -4.034811000 | -0.080383000 |
| C | 0.293336000  | -3.820319000 | -2.916351000 |
| H | 0.018774000  | -2.099762000 | -4.198835000 |
| H | -1.841589000 | -3.666777000 | -2.899519000 |
| H | 0.360541000  | -4.416419000 | -3.830757000 |
| H | 1.533909000  | -2.810235000 | 1.702598000  |
| H | 1.536016000  | -2.863386000 | 4.093667000  |
| H | -0.243998000 | -4.153213000 | 5.373615000  |
| H | -0.888108000 | -1.899392000 | 5.474663000  |
| H | -1.411721000 | -0.573040000 | 3.312926000  |
| H | -1.466529000 | -2.690520000 | 1.885599000  |
| H | 0.867094000  | -2.519653000 | -0.594056000 |
| H | 0.543799000  | -0.513086000 | -2.068817000 |
| H | 1.566853000  | -2.133826000 | -3.373833000 |
| H | 1.093218000  | -4.172961000 | -2.255076000 |
| H | -1.251125000 | -5.103661000 | -2.092577000 |
| H | -2.136432000 | -2.981165000 | -0.665883000 |
| H | -4.108272000 | 2.390820000  | 0.383661000  |
| C | -1.468854000 | 1.900589000  | -0.865662000 |
| H | -1.161508000 | 1.235347000  | -1.678646000 |
| C | -2.317643000 | 3.027201000  | -1.465355000 |
| H | -3.198208000 | 2.585713000  | -1.937804000 |
| H | -2.668050000 | 3.724334000  | -0.704265000 |
| H | -1.790419000 | 3.594509000  | -2.222454000 |
| P | 0.212946000  | 2.393216000  | -0.161980000 |
| C | 1.185053000  | 3.071184000  | -1.667241000 |
| C | -0.090727000 | 3.772056000  | 1.125167000  |
| C | 0.540627000  | 4.194596000  | -2.503015000 |
| H | 1.335356000  | 4.622428000  | -3.123687000 |

|    |              |              |              |
|----|--------------|--------------|--------------|
| H  | -0.210771000 | 3.806059000  | -3.190380000 |
| H  | 0.106335000  | 5.007707000  | -1.928963000 |
| C  | 1.426345000  | 1.912398000  | -2.644690000 |
| H  | 1.995994000  | 1.100589000  | -2.200335000 |
| H  | 0.490005000  | 1.517223000  | -3.047579000 |
| H  | 1.999329000  | 2.304301000  | -3.492411000 |
| C  | 2.539324000  | 3.583680000  | -1.158062000 |
| H  | 3.171548000  | 3.800416000  | -2.025916000 |
| H  | 2.430511000  | 4.511888000  | -0.591913000 |
| H  | 3.056511000  | 2.855226000  | -0.534108000 |
| C  | 1.117562000  | 3.946418000  | 2.052918000  |
| H  | 2.042238000  | 4.153598000  | 1.516302000  |
| H  | 0.908216000  | 4.797095000  | 2.710868000  |
| H  | 1.282869000  | 3.068396000  | 2.675321000  |
| C  | -0.383374000 | 5.142784000  | 0.499992000  |
| H  | -0.685694000 | 5.818864000  | 1.307146000  |
| H  | 0.506231000  | 5.571597000  | 0.035577000  |
| H  | -1.190607000 | 5.125840000  | -0.231008000 |
| C  | -1.286463000 | 3.368993000  | 2.001727000  |
| H  | -2.236165000 | 3.468790000  | 1.478192000  |
| H  | -1.202769000 | 2.348513000  | 2.384318000  |
| H  | -1.313732000 | 4.043784000  | 2.863854000  |
| Ir | 1.317919000  | 0.501773000  | 0.905046000  |
| Cl | 3.456181000  | 1.649197000  | 1.641164000  |
| H  | 2.215891000  | -0.871735000 | 1.540474000  |
| H  | 0.503272000  | 1.025757000  | 2.118609000  |
| O  | 2.683270000  | -0.274690000 | -0.829289000 |
| C  | 3.346256000  | -1.327655000 | -0.697566000 |
| C  | 4.213756000  | -1.704752000 | -1.926280000 |
| O  | 3.428853000  | -2.100591000 | 0.258777000  |
| F  | 5.517668000  | -1.543465000 | -1.641955000 |
| F  | 3.951454000  | -0.971368000 | -3.013809000 |

|   |             |              |              |
|---|-------------|--------------|--------------|
| F | 4.035755000 | -2.992968000 | -2.260749000 |
| H | 1.859659000 | -0.479484000 | 2.209572000  |

---

**TS<sub>H1-H2</sub>**

| Coordinates (Angstroms) |              |              |              |
|-------------------------|--------------|--------------|--------------|
|                         | X            | Y            | Z            |
| C                       | 5.120994000  | -1.631521000 | -0.583619000 |
| C                       | 5.407363000  | -3.013744000 | -0.405450000 |
| H                       | 5.459721000  | -3.758319000 | -1.186681000 |
| C                       | 5.555119000  | -3.257286000 | 0.988623000  |
| H                       | 5.743023000  | -4.216971000 | 1.448059000  |
| C                       | 5.099581000  | -1.023663000 | 0.699572000  |
| H                       | 4.902114000  | 0.016165000  | 0.897619000  |
| C                       | 5.362568000  | -2.024626000 | 1.673588000  |
| H                       | 5.391125000  | -1.878778000 | 2.743863000  |
| H                       | 4.924282000  | -1.133720000 | -1.521986000 |
| C                       | 1.889293000  | -2.425255000 | -0.411423000 |
| C                       | 2.289678000  | -3.777885000 | -0.219981000 |
| C                       | 2.416901000  | -4.022365000 | 1.171168000  |
| H                       | 2.744338000  | -4.944480000 | 1.628915000  |
| C                       | 1.755597000  | -1.818972000 | 0.883645000  |
| C                       | 2.104170000  | -2.822813000 | 1.851505000  |
| H                       | 2.130861000  | -2.694544000 | 2.922104000  |
| Fe                      | 3.685935000  | -2.521908000 | 0.586542000  |
| P                       | 0.866948000  | -0.266209000 | 1.273452000  |
| C                       | 0.031101000  | -0.824557000 | 2.859772000  |
| C                       | -0.601927000 | 0.349079000  | 3.627954000  |
| C                       | -0.955560000 | -1.980917000 | 2.743832000  |
| C                       | -1.737091000 | -0.092970000 | 4.560447000  |
| H                       | 0.165862000  | 0.853245000  | 4.222496000  |
| C                       | -1.313715000 | -2.531618000 | 4.136243000  |
| H                       | -1.856433000 | -1.634947000 | 2.231458000  |

|   |              |              |              |
|---|--------------|--------------|--------------|
| C | -1.394292000 | -1.430093000 | 5.209403000  |
| H | -1.910442000 | 0.680703000  | 5.314123000  |
| H | -0.571164000 | -3.280057000 | 4.431785000  |
| H | -0.430345000 | -1.333551000 | 5.723160000  |
| C | 2.035973000  | 0.953351000  | 2.077277000  |
| C | 2.788727000  | 1.875298000  | 1.121652000  |
| C | 2.956815000  | 0.323639000  | 3.146261000  |
| C | 3.518352000  | 3.017306000  | 1.866392000  |
| H | 3.489766000  | 1.299113000  | 0.518791000  |
| C | 4.150135000  | 1.229114000  | 3.497315000  |
| H | 2.374926000  | 0.152015000  | 4.056239000  |
| C | 3.779562000  | 2.699666000  | 3.343666000  |
| H | 4.474260000  | 3.205673000  | 1.366669000  |
| H | 4.999612000  | 1.012630000  | 2.839832000  |
| H | 4.570687000  | 3.347539000  | 3.732231000  |
| H | -0.970037000 | 1.076589000  | 2.911181000  |
| H | -2.672839000 | -0.201841000 | 4.001481000  |
| H | -2.130341000 | -1.695723000 | 5.973117000  |
| H | -2.273186000 | -3.053499000 | 4.064022000  |
| H | -0.534798000 | -2.791506000 | 2.151574000  |
| H | 0.872335000  | -1.190947000 | 3.451493000  |
| H | 1.319897000  | 1.590309000  | 2.603492000  |
| H | 2.074724000  | 2.309538000  | 0.427356000  |
| H | 2.940239000  | 3.942876000  | 1.787181000  |
| H | 2.881994000  | 2.908350000  | 3.939335000  |
| H | 4.482625000  | 1.009208000  | 4.515977000  |
| H | 3.325478000  | -0.647806000 | 2.816381000  |
| H | 2.498502000  | -4.490765000 | -1.003162000 |
| C | 1.699729000  | -1.778937000 | -1.755858000 |
| H | 2.142721000  | -0.782357000 | -1.689865000 |
| C | 2.489136000  | -2.539870000 | -2.824721000 |
| H | 3.445342000  | -2.845154000 | -2.398223000 |



|    |              |              |              |
|----|--------------|--------------|--------------|
| H  | 1.986213000  | -3.435479000 | -3.189488000 |
| H  | 2.714754000  | -1.893535000 | -3.667671000 |
| P  | -0.094902000 | -1.271650000 | -2.060094000 |
| C  | -0.177029000 | -0.864599000 | -3.960900000 |
| C  | -1.312565000 | -2.711508000 | -1.778714000 |
| C  | 0.454627000  | -1.908555000 | -4.917424000 |
| H  | -0.032404000 | -1.786656000 | -5.890391000 |
| H  | 1.514622000  | -1.731810000 | -5.079437000 |
| H  | 0.322421000  | -2.944757000 | -4.618993000 |
| C  | 0.571799000  | 0.450781000  | -4.202299000 |
| H  | 0.100186000  | 1.285989000  | -3.689559000 |
| H  | 1.615196000  | 0.376064000  | -3.888202000 |
| H  | 0.567407000  | 0.654028000  | -5.279452000 |
| C  | -1.631366000 | -0.716068000 | -4.449236000 |
| H  | -1.597874000 | -0.197929000 | -5.414551000 |
| H  | -2.088593000 | -1.690816000 | -4.627338000 |
| H  | -2.258339000 | -0.134295000 | -3.782291000 |
| C  | -2.760600000 | -2.198921000 | -1.887095000 |
| H  | -3.072451000 | -1.996434000 | -2.907721000 |
| H  | -3.422360000 | -2.975897000 | -1.491751000 |
| H  | -2.914244000 | -1.296336000 | -1.293500000 |
| C  | -1.107372000 | -3.886291000 | -2.739912000 |
| H  | -1.768261000 | -4.702713000 | -2.426927000 |
| H  | -1.368545000 | -3.637336000 | -3.768304000 |
| H  | -0.081891000 | -4.264914000 | -2.714709000 |
| C  | -1.166301000 | -3.227879000 | -0.347828000 |
| H  | -0.197376000 | -3.680619000 | -0.146780000 |
| H  | -1.338629000 | -2.421935000 | 0.356889000  |
| H  | -1.935259000 | -3.988821000 | -0.173973000 |
| Ir | -0.460790000 | 0.573470000  | -0.475315000 |
| Cl | -1.995219000 | 1.558951000  | -2.123044000 |
| H  | -1.067886000 | 1.994545000  | 0.508307000  |

|   |              |              |              |
|---|--------------|--------------|--------------|
| H | -1.609211000 | -0.234910000 | 0.183783000  |
| C | -2.045628000 | 3.137208000  | 0.908081000  |
| C | -1.826185000 | 4.181296000  | -0.168973000 |
| C | -0.395721000 | 4.708752000  | -0.252105000 |
| C | 0.133635000  | 5.183937000  | 1.095540000  |
| C | 0.018261000  | 4.054036000  | 2.110551000  |
| C | -1.410239000 | 3.547245000  | 2.231989000  |
| H | -2.119945000 | 3.787720000  | -1.138704000 |
| H | 0.250630000  | 3.915366000  | -0.633078000 |
| H | 1.176712000  | 5.501067000  | 0.999543000  |
| H | 0.656193000  | 3.230587000  | 1.788572000  |
| H | -2.056304000 | 4.364106000  | 2.584831000  |
| C | -3.574176000 | 1.683504000  | 2.109697000  |
| C | -4.357998000 | 2.756990000  | 0.034441000  |
| C | -4.871424000 | 0.932407000  | 1.872706000  |
| H | -2.769201000 | 0.945409000  | 2.155694000  |
| C | -4.962312000 | 1.441852000  | -0.480550000 |
| H | -5.136922000 | 3.343554000  | 0.533972000  |
| H | -4.950757000 | 0.141580000  | 2.611805000  |
| H | -4.443406000 | 1.123901000  | -1.384776000 |
| H | -2.509195000 | 5.004527000  | 0.081688000  |
| H | -0.373086000 | 5.519548000  | -0.986306000 |
| H | -0.439312000 | 6.053791000  | 1.441427000  |
| H | 0.368388000  | 4.368388000  | 3.098000000  |
| H | -1.473799000 | 2.767725000  | 2.982827000  |
| H | -4.019389000 | 3.335710000  | -0.817631000 |
| H | -3.618874000 | 2.223395000  | 3.060762000  |
| H | -5.745545000 | 1.585223000  | 2.002230000  |
| H | -6.014904000 | 1.648389000  | -0.729966000 |
| C | -5.297550000 | -0.876780000 | 0.216313000  |
| C | -4.972293000 | -1.992809000 | 1.004784000  |
| C | -6.032309000 | -1.155457000 | -0.946296000 |

|   |              |              |              |
|---|--------------|--------------|--------------|
| C | -5.361251000 | -3.277936000 | 0.705527000  |
| C | -6.417672000 | -2.451375000 | -1.275028000 |
| H | -6.302719000 | -0.345499000 | -1.611174000 |
| C | -6.097983000 | -3.519947000 | -0.450695000 |
| H | -5.060851000 | -4.079516000 | 1.370686000  |
| H | -6.979077000 | -2.616430000 | -2.188069000 |
| H | -6.400075000 | -4.529941000 | -0.700638000 |
| F | -4.192112000 | -1.817049000 | 2.103205000  |
| O | 1.053085000  | 2.038845000  | -1.563311000 |
| C | 2.224142000  | 2.048201000  | -1.989430000 |
| C | 2.640918000  | 3.437266000  | -2.548257000 |
| O | 3.092296000  | 1.172925000  | -2.004175000 |
| F | 2.950411000  | 4.270246000  | -1.530613000 |
| F | 1.660543000  | 4.026183000  | -3.250060000 |
| F | 3.714917000  | 3.374013000  | -3.343832000 |
| N | -3.273681000 | 2.581124000  | 0.996308000  |
| N | -4.837017000 | 0.395468000  | 0.520770000  |

---

**TS<sub>H3-G1</sub>**

| Coordinates (Angstroms) |              |              |              |
|-------------------------|--------------|--------------|--------------|
|                         | X            | Y            | Z            |
| C                       | -4.137072000 | -0.356528000 | -2.427447000 |
| C                       | -5.322860000 | -0.047168000 | -1.703908000 |
| H                       | -5.839217000 | 0.901794000  | -1.704991000 |
| C                       | -5.677877000 | -1.187960000 | -0.931749000 |
| H                       | -6.509285000 | -1.253195000 | -0.244762000 |
| C                       | -3.768435000 | -1.689854000 | -2.105499000 |
| H                       | -2.915571000 | -2.216493000 | -2.497970000 |
| C                       | -4.712091000 | -2.204535000 | -1.175949000 |
| H                       | -4.689212000 | -3.184600000 | -0.721855000 |
| H                       | -3.597066000 | 0.309763000  | -3.084901000 |
| C                       | -2.417947000 | 0.894528000  | 0.160332000  |

|    |              |              |              |
|----|--------------|--------------|--------------|
| C  | -3.688487000 | 1.160763000  | 0.747880000  |
| C  | -4.067831000 | 0.052853000  | 1.547878000  |
| H  | -4.998756000 | -0.052777000 | 2.085365000  |
| C  | -2.007965000 | -0.405313000 | 0.609504000  |
| C  | -3.047036000 | -0.920017000 | 1.454176000  |
| H  | -3.053093000 | -1.881528000 | 1.943683000  |
| Fe | -3.817624000 | -0.517133000 | -0.403542000 |
| P  | -0.309578000 | -1.027896000 | 0.569347000  |
| C  | -0.285596000 | -2.205508000 | 2.002307000  |
| C  | 0.938319000  | -3.158298000 | 2.004453000  |
| C  | -0.411228000 | -1.483753000 | 3.350731000  |
| C  | 1.360232000  | -3.543274000 | 3.429280000  |
| H  | 0.676825000  | -4.068713000 | 1.459269000  |
| C  | -0.685826000 | -2.490068000 | 4.476088000  |
| H  | 0.521203000  | -0.949946000 | 3.549711000  |
| C  | 0.132284000  | -3.787325000 | 4.304452000  |
| H  | 1.990648000  | -4.436169000 | 3.387567000  |
| H  | -1.754661000 | -2.726206000 | 4.504739000  |
| H  | -0.484343000 | -4.557413000 | 3.826049000  |
| C  | -0.006452000 | -2.104537000 | -0.887867000 |
| C  | -0.054407000 | -1.336919000 | -2.209920000 |
| C  | -0.878364000 | -3.372083000 | -0.954630000 |
| C  | 0.605703000  | -2.168652000 | -3.325976000 |
| H  | -1.096304000 | -1.114705000 | -2.454943000 |
| C  | -0.811461000 | -4.019638000 | -2.355008000 |
| H  | -0.529807000 | -4.090454000 | -0.210270000 |
| C  | 0.498240000  | -3.681995000 | -3.065571000 |
| H  | 0.132951000  | -1.924130000 | -4.282493000 |
| H  | -1.641733000 | -3.671500000 | -2.978985000 |
| H  | 0.574309000  | -4.230249000 | -4.008674000 |
| H  | 1.792764000  | -2.724638000 | 1.484445000  |
| H  | 1.973527000  | -2.748544000 | 3.869142000  |

|   |               |              |              |
|---|---------------|--------------|--------------|
| H | 0.424211000   | -4.185096000 | 5.280219000  |
| H | -0.4444632000 | -2.015523000 | 5.432436000  |
| H | -1.199265000  | -0.727669000 | 3.328133000  |
| H | -1.182142000  | -2.817941000 | 1.861459000  |
| H | 1.034400000   | -2.410625000 | -0.723712000 |
| H | 0.453379000   | -0.380206000 | -2.111155000 |
| H | 1.659883000   | -1.888841000 | -3.414189000 |
| H | 1.337781000   | -4.015053000 | -2.444868000 |
| H | -0.933795000  | -5.102028000 | -2.260723000 |
| H | -1.915032000  | -3.133628000 | -0.700342000 |
| H | -4.290761000  | 2.040878000  | 0.586398000  |
| C | -1.687889000  | 1.813442000  | -0.794434000 |
| H | -1.369935000  | 1.203356000  | -1.645940000 |
| C | -2.665269000  | 2.874561000  | -1.311818000 |
| H | -3.518411000  | 2.370611000  | -1.772788000 |
| H | -3.050588000  | 3.501783000  | -0.508045000 |
| H | -2.224668000  | 3.523718000  | -2.058139000 |
| P | -0.012006000  | 2.421156000  | -0.155385000 |
| C | 0.814854000   | 3.233014000  | -1.684454000 |
| C | -0.375134000  | 3.747806000  | 1.169963000  |
| C | 0.015437000   | 4.283810000  | -2.477673000 |
| H | 0.727920000   | 4.810409000  | -3.122331000 |
| H | -0.715775000  | 3.819100000  | -3.140101000 |
| H | -0.484858000  | 5.032311000  | -1.869476000 |
| C | 1.158060000   | 2.125948000  | -2.691249000 |
| H | 1.854545000   | 1.393266000  | -2.292807000 |
| H | 0.264287000   | 1.610688000  | -3.052491000 |
| H | 1.628931000   | 2.596458000  | -3.561832000 |
| C | 2.119333000   | 3.891034000  | -1.212975000 |
| H | 2.711071000   | 4.155654000  | -2.096350000 |
| H | 1.927933000   | 4.813848000  | -0.660064000 |
| H | 2.718643000   | 3.229882000  | -0.586250000 |

|    |              |              |              |
|----|--------------|--------------|--------------|
| C  | 0.866706000  | 4.015375000  | 2.030368000  |
| H  | 1.733812000  | 4.320537000  | 1.446415000  |
| H  | 0.622332000  | 4.826392000  | 2.725645000  |
| H  | 1.151257000  | 3.141063000  | 2.614231000  |
| C  | -0.839287000 | 5.097755000  | 0.606306000  |
| H  | -1.148747000 | 5.725166000  | 1.449707000  |
| H  | -0.030050000 | 5.621562000  | 0.094322000  |
| H  | -1.689413000 | 5.018041000  | -0.070030000 |
| C  | -1.469262000 | 3.209863000  | 2.106098000  |
| H  | -2.456280000 | 3.237964000  | 1.645936000  |
| H  | -1.270060000 | 2.188357000  | 2.440122000  |
| H  | -1.501896000 | 3.849513000  | 2.994666000  |
| Ir | 1.278974000  | 0.604702000  | 0.799567000  |
| Cl | 3.375468000  | 1.891541000  | 1.450800000  |
| H  | 2.680664000  | -0.848347000 | 1.137076000  |
| H  | 0.533100000  | 0.968723000  | 2.103856000  |
| O  | 2.698038000  | -0.056831000 | -1.043818000 |
| C  | 3.481982000  | -0.944709000 | -0.707998000 |
| C  | 4.411909000  | -1.539577000 | -1.783273000 |
| O  | 3.605637000  | -1.456848000 | 0.436509000  |
| F  | 5.689956000  | -1.485878000 | -1.396166000 |
| F  | 4.305423000  | -0.898563000 | -2.946024000 |
| F  | 4.101751000  | -2.827772000 | -1.993277000 |
| H  | 2.011767000  | -0.525217000 | 1.806492000  |

---

**G2c**

| Coordinates (Angstroms) |              |              |              |
|-------------------------|--------------|--------------|--------------|
|                         | X            | Y            | Z            |
| C                       | -2.800428000 | -3.355343000 | 0.748159000  |
| C                       | -3.183374000 | -3.950369000 | -0.486523000 |
| H                       | -2.724621000 | -4.814178000 | -0.945367000 |
| C                       | -4.240587000 | -3.175213000 | -1.040329000 |

|    |              |              |              |
|----|--------------|--------------|--------------|
| H  | -4.721831000 | -3.348590000 | -1.991959000 |
| C  | -3.625957000 | -2.218647000 | 0.955298000  |
| H  | -3.585374000 | -1.560069000 | 1.805591000  |
| C  | -4.512373000 | -2.099518000 | -0.148812000 |
| H  | -5.247397000 | -1.320920000 | -0.293427000 |
| H  | -2.007956000 | -3.691547000 | 1.401429000  |
| C  | -0.544604000 | -1.604711000 | -1.001638000 |
| C  | -1.052257000 | -2.275658000 | -2.152778000 |
| C  | -2.091867000 | -1.497764000 | -2.723097000 |
| H  | -2.689537000 | -1.767709000 | -3.581483000 |
| C  | -1.287687000 | -0.380925000 | -0.866087000 |
| C  | -2.253773000 | -0.342070000 | -1.925146000 |
| H  | -2.977311000 | 0.440695000  | -2.094294000 |
| Fe | -2.559877000 | -2.029903000 | -0.803312000 |
| P  | -0.762174000 | 1.072415000  | 0.086303000  |
| C  | -1.578391000 | 2.471564000  | -0.815144000 |
| C  | -1.534587000 | 3.801720000  | -0.024499000 |
| C  | -1.015198000 | 2.682187000  | -2.225779000 |
| C  | -1.618131000 | 5.021183000  | -0.958510000 |
| H  | -2.370877000 | 3.831005000  | 0.678193000  |
| C  | -1.937900000 | 3.611966000  | -3.028271000 |
| H  | -0.019612000 | 3.124484000  | -2.137576000 |
| C  | -2.531125000 | 4.731195000  | -2.148387000 |
| H  | -1.977202000 | 5.886159000  | -0.393749000 |
| H  | -2.747879000 | 3.028699000  | -3.478614000 |
| H  | -3.513574000 | 4.427444000  | -1.767919000 |
| C  | -1.583283000 | 1.106252000  | 1.737253000  |
| C  | -1.150555000 | -0.042784000 | 2.649739000  |
| C  | -3.120008000 | 1.210918000  | 1.690776000  |
| C  | -1.545796000 | 0.256361000  | 4.109786000  |
| H  | -1.620811000 | -0.966922000 | 2.304344000  |
| C  | -3.751871000 | 0.889003000  | 3.062496000  |

|   |              |              |              |
|---|--------------|--------------|--------------|
| H | -3.404855000 | 2.222910000  | 1.397003000  |
| C | -2.778650000 | 1.172111000  | 4.204974000  |
| H | -1.746410000 | -0.688278000 | 4.625444000  |
| H | -4.045577000 | -0.164856000 | 3.113894000  |
| H | -3.271785000 | 1.037538000  | 5.171775000  |
| H | -0.618806000 | 3.868909000  | 0.568695000  |
| H | -0.618784000 | 5.280864000  | -1.325818000 |
| H | -2.693855000 | 5.635431000  | -2.741353000 |
| H | -1.366571000 | 4.046954000  | -3.854465000 |
| H | -0.884916000 | 1.735785000  | -2.755398000 |
| H | -2.626367000 | 2.168093000  | -0.909019000 |
| H | -1.179235000 | 2.033585000  | 2.162650000  |
| H | -0.076111000 | -0.202325000 | 2.583317000  |
| H | -0.703479000 | 0.725790000  | 4.628140000  |
| H | -2.469077000 | 2.222631000  | 4.157842000  |
| H | -4.672067000 | 1.466653000  | 3.185007000  |
| H | -3.520390000 | 0.537806000  | 0.927148000  |
| H | -0.735691000 | -3.239793000 | -2.517787000 |
| C | 0.538509000  | -2.153339000 | -0.091632000 |
| H | 0.177209000  | -2.038675000 | 0.935468000  |
| C | 0.710344000  | -3.651544000 | -0.369198000 |
| H | -0.253854000 | -4.148376000 | -0.236001000 |
| H | 1.036568000  | -3.843232000 | -1.391419000 |
| H | 1.418418000  | -4.125268000 | 0.299436000  |
| P | 2.104790000  | -1.087967000 | -0.024915000 |
| C | 3.108575000  | -1.785763000 | 1.455091000  |
| C | 3.059232000  | -1.412876000 | -1.646632000 |
| C | 3.304076000  | -3.310352000 | 1.539887000  |
| H | 4.093400000  | -3.498887000 | 2.276249000  |
| H | 2.407046000  | -3.809588000 | 1.909568000  |
| H | 3.609866000  | -3.778400000 | 0.607512000  |
| C | 2.411090000  | -1.386742000 | 2.764446000  |



|    |             |              |              |
|----|-------------|--------------|--------------|
| H  | 2.438292000 | -0.312479000 | 2.947165000  |
| H  | 1.374443000 | -1.729616000 | 2.806109000  |
| H  | 2.943916000 | -1.865278000 | 3.593291000  |
| C  | 4.494382000 | -1.123438000 | 1.433009000  |
| H  | 4.984099000 | -1.311534000 | 2.395203000  |
| H  | 5.135283000 | -1.542525000 | 0.654523000  |
| H  | 4.431274000 | -0.043575000 | 1.287839000  |
| C  | 4.107008000 | -0.314519000 | -1.875764000 |
| H  | 4.842041000 | -0.254277000 | -1.074111000 |
| H  | 4.639867000 | -0.544790000 | -2.805704000 |
| H  | 3.647297000 | 0.667714000  | -1.979061000 |
| C  | 3.778896000 | -2.766723000 | -1.714060000 |
| H  | 4.183789000 | -2.886864000 | -2.725452000 |
| H  | 4.620928000 | -2.816379000 | -1.021753000 |
| H  | 3.119947000 | -3.613036000 | -1.522162000 |
| C  | 2.059755000 | -1.339244000 | -2.811656000 |
| H  | 1.421923000 | -2.220904000 | -2.862526000 |
| H  | 1.422797000 | -0.452492000 | -2.761162000 |
| H  | 2.626562000 | -1.288101000 | -3.747740000 |
| Ir | 1.490836000 | 1.302961000  | 0.211951000  |
| Cl | 3.853190000 | 2.264992000  | 0.340500000  |
| H  | 1.489706000 | 1.303707000  | -1.377858000 |
| H  | 1.126764000 | 2.857747000  | 0.071327000  |
| H  | 1.369733000 | 1.853781000  | 1.895236000  |
| H  | 1.648841000 | 1.061466000  | 1.978523000  |

---

**G3c**

---

| Coordinates (Angstroms) |             |             |              |
|-------------------------|-------------|-------------|--------------|
|                         | X           | Y           | Z            |
| C                       | 2.717868000 | 3.522923000 | -1.734392000 |
| C                       | 3.566743000 | 4.179011000 | -0.799741000 |
| H                       | 4.632079000 | 4.032212000 | -0.695538000 |

|    |              |              |              |
|----|--------------|--------------|--------------|
| C  | 2.757168000  | 5.017766000  | 0.016408000  |
| H  | 3.103176000  | 5.622375000  | 0.842387000  |
| C  | 1.388719000  | 3.961621000  | -1.497568000 |
| H  | 0.518237000  | 3.646781000  | -2.047841000 |
| C  | 1.407040000  | 4.881036000  | -0.412962000 |
| H  | 0.547459000  | 5.372279000  | 0.019837000  |
| H  | 3.023315000  | 2.796951000  | -2.474206000 |
| C  | 2.378535000  | 1.026649000  | 0.464126000  |
| C  | 3.309852000  | 1.757701000  | 1.260465000  |
| C  | 2.598269000  | 2.608701000  | 2.143651000  |
| H  | 3.033595000  | 3.309093000  | 2.841393000  |
| C  | 1.062202000  | 1.435255000  | 0.875003000  |
| C  | 1.218295000  | 2.427168000  | 1.898092000  |
| H  | 0.418517000  | 2.944485000  | 2.405568000  |
| Fe | 2.167351000  | 3.065487000  | 0.194944000  |
| P  | -0.490154000 | 0.544733000  | 0.555250000  |
| C  | -1.553361000 | 1.040486000  | 1.988754000  |
| C  | -3.037021000 | 0.652219000  | 1.777733000  |
| C  | -1.046822000 | 0.498788000  | 3.329810000  |
| C  | -3.764121000 | 0.430906000  | 3.113093000  |
| H  | -3.540794000 | 1.449340000  | 1.227031000  |
| C  | -1.783577000 | 1.188896000  | 4.487339000  |
| H  | -1.226085000 | -0.578549000 | 3.359249000  |
| C  | -3.273447000 | 1.426140000  | 4.163073000  |
| H  | -4.841996000 | 0.529136000  | 2.957123000  |
| H  | -1.298847000 | 2.144485000  | 4.713883000  |
| H  | -3.413818000 | 2.440289000  | 3.770118000  |
| C  | -1.352616000 | 1.308347000  | -0.890138000 |
| C  | -0.564049000 | 1.076334000  | -2.186294000 |
| C  | -1.741134000 | 2.778839000  | -0.658202000 |
| C  | -1.198833000 | 1.765495000  | -3.418598000 |
| H  | 0.461617000  | 1.428965000  | -2.053468000 |

|   |              |              |              |
|---|--------------|--------------|--------------|
| C | -2.299815000 | 3.460379000  | -1.932912000 |
| H | -2.497326000 | 2.824620000  | 0.126182000  |
| C | -2.506406000 | 2.481510000  | -3.087426000 |
| H | -0.495771000 | 2.501501000  | -3.825914000 |
| H | -1.608905000 | 4.242811000  | -2.267035000 |
| H | -2.869349000 | 3.018629000  | -3.969328000 |
| H | -3.120894000 | -0.251561000 | 1.169395000  |
| H | -3.591281000 | -0.590775000 | 3.469919000  |
| H | -3.874698000 | 1.360155000  | 5.074213000  |
| H | -1.688786000 | 0.568242000  | 5.384101000  |
| H | 0.031794000  | 0.636630000  | 3.439003000  |
| H | -1.490203000 | 2.132721000  | 2.022670000  |
| H | -2.272649000 | 0.720157000  | -0.955838000 |
| H | -0.502864000 | 0.003514000  | -2.361203000 |
| H | -1.368193000 | 1.027402000  | -4.207519000 |
| H | -3.273522000 | 1.746669000  | -2.827295000 |
| H | -3.241845000 | 3.963102000  | -1.696913000 |
| H | -0.878877000 | 3.333393000  | -0.283361000 |
| H | 4.384491000  | 1.709305000  | 1.183524000  |
| C | 2.767956000  | 0.055713000  | -0.634177000 |
| H | 2.195853000  | 0.333750000  | -1.524159000 |
| C | 4.254172000  | 0.240727000  | -0.962724000 |
| H | 4.428519000  | 1.284854000  | -1.235598000 |
| H | 4.895775000  | 0.014587000  | -0.111363000 |
| H | 4.578026000  | -0.374785000 | -1.792853000 |
| P | 2.140531000  | -1.710226000 | -0.364896000 |
| C | 2.382597000  | -2.565098000 | -2.063837000 |
| C | 3.307933000  | -2.499322000 | 0.925104000  |
| C | 3.746167000  | -2.412058000 | -2.761276000 |
| H | 3.785196000  | -3.147329000 | -3.572910000 |
| H | 3.854449000  | -1.429546000 | -3.223575000 |
| H | 4.602449000  | -2.594579000 | -2.116272000 |

|    |              |              |              |
|----|--------------|--------------|--------------|
| C  | 1.345505000  | -2.006878000 | -3.050737000 |
| H  | 0.323307000  | -2.274476000 | -2.785325000 |
| H  | 1.408836000  | -0.920910000 | -3.155289000 |
| H  | 1.544678000  | -2.442031000 | -4.036079000 |
| C  | 2.104974000  | -4.063996000 | -1.875203000 |
| H  | 2.003575000  | -4.526247000 | -2.863716000 |
| H  | 2.926538000  | -4.568782000 | -1.362065000 |
| H  | 1.183385000  | -4.245350000 | -1.318965000 |
| C  | 2.671345000  | -3.762540000 | 1.521167000  |
| H  | 2.447515000  | -4.519757000 | 0.770678000  |
| H  | 3.381888000  | -4.193464000 | 2.236194000  |
| H  | 1.745532000  | -3.540001000 | 2.050637000  |
| C  | 4.696305000  | -2.888528000 | 0.398703000  |
| H  | 5.303629000  | -3.211845000 | 1.252156000  |
| H  | 4.648408000  | -3.727272000 | -0.298399000 |
| H  | 5.222562000  | -2.065384000 | -0.083085000 |
| C  | 3.485568000  | -1.495439000 | 2.075904000  |
| H  | 4.145461000  | -0.670692000 | 1.808520000  |
| H  | 2.533434000  | -1.081785000 | 2.417679000  |
| H  | 3.942275000  | -2.019963000 | 2.922380000  |
| Ir | -0.218951000 | -1.701177000 | 0.418183000  |
| Cl | -0.555087000 | -4.231131000 | 0.582994000  |
| H  | 0.422107000  | -1.611914000 | 1.868838000  |
| H  | -1.620486000 | -1.717219000 | 1.191626000  |
| H  | -1.448099000 | -1.807671000 | -0.872638000 |
| H  | -0.737177000 | -1.934358000 | -1.294584000 |
| C  | -4.157742000 | -1.239053000 | -1.419241000 |
| O  | -4.044477000 | -2.238823000 | -0.697136000 |
| O  | -3.535579000 | -0.914479000 | -2.444582000 |
| C  | -5.281773000 | -0.234584000 | -1.014268000 |
| F  | -5.807926000 | -0.481822000 | 0.193391000  |
| F  | -6.295296000 | -0.282685000 | -1.902370000 |

|   |              |             |              |
|---|--------------|-------------|--------------|
| F | -4.850648000 | 1.042634000 | -0.996067000 |
|---|--------------|-------------|--------------|

---

**G4c**

---

| Coordinates (Angstroms) |              |              |              |
|-------------------------|--------------|--------------|--------------|
|                         | X            | Y            | Z            |
| C                       | 2.796813000  | 3.007285000  | -2.290377000 |
| C                       | 3.901441000  | 3.561095000  | -1.584421000 |
| H                       | 4.930820000  | 3.242189000  | -1.663405000 |
| C                       | 3.405326000  | 4.569396000  | -0.711826000 |
| H                       | 3.994275000  | 5.151967000  | -0.018161000 |
| C                       | 1.623998000  | 3.681286000  | -1.859732000 |
| H                       | 0.626582000  | 3.492801000  | -2.219105000 |
| C                       | 1.993489000  | 4.641519000  | -0.878768000 |
| H                       | 1.321681000  | 5.297679000  | -0.344330000 |
| H                       | 2.836147000  | 2.200784000  | -3.008579000 |
| C                       | 2.523532000  | 0.731427000  | 0.142594000  |
| C                       | 3.675325000  | 1.352829000  | 0.711853000  |
| C                       | 3.257417000  | 2.355926000  | 1.623388000  |
| H                       | 3.904108000  | 3.017754000  | 2.181045000  |
| C                       | 1.370492000  | 1.360400000  | 0.729999000  |
| C                       | 1.843341000  | 2.374250000  | 1.625301000  |
| H                       | 1.226932000  | 3.034268000  | 2.216442000  |
| Fe                      | 2.560580000  | 2.759965000  | -0.259802000 |
| P                       | -0.321005000 | 0.675366000  | 0.752841000  |
| C                       | -1.045187000 | 1.442594000  | 2.283477000  |
| C                       | -2.584029000 | 1.288000000  | 2.350490000  |
| C                       | -0.413953000 | 0.938267000  | 3.584105000  |
| C                       | -3.101147000 | 1.357899000  | 3.797282000  |
| H                       | -3.054601000 | 2.082888000  | 1.765405000  |
| C                       | -0.818698000 | 1.850840000  | 4.752932000  |
| H                       | -0.757212000 | -0.082818000 | 3.766189000  |
| C                       | -2.274455000 | 2.343582000  | 4.620880000  |

|   |              |              |              |
|---|--------------|--------------|--------------|
| H | -4.157580000 | 1.641816000  | 3.792402000  |
| H | -0.141468000 | 2.710492000  | 4.800550000  |
| H | -2.296143000 | 3.319564000  | 4.121289000  |
| C | -1.302398000 | 1.517440000  | -0.577433000 |
| C | -0.801588000 | 1.110918000  | -1.968086000 |
| C | -1.427177000 | 3.039808000  | -0.400762000 |
| C | -1.555686000 | 1.819420000  | -3.119307000 |
| H | 0.268267000  | 1.321261000  | -2.040482000 |
| C | -2.133977000 | 3.723241000  | -1.599331000 |
| H | -1.994596000 | 3.250816000  | 0.505740000  |
| C | -2.680599000 | 2.720700000  | -2.614601000 |
| H | -0.855433000 | 2.437902000  | -3.692779000 |
| H | -1.429722000 | 4.382828000  | -2.119069000 |
| H | -3.139937000 | 3.251396000  | -3.454376000 |
| H | -2.896218000 | 0.341606000  | 1.902924000  |
| H | -3.046759000 | 0.367098000  | 4.262556000  |
| H | -2.717432000 | 2.491598000  | 5.609898000  |
| H | -0.693430000 | 1.300781000  | 5.691222000  |
| H | 0.675062000  | 0.885635000  | 3.508785000  |
| H | -0.817660000 | 2.509691000  | 2.196108000  |
| H | -2.298307000 | 1.084273000  | -0.439294000 |
| H | -0.912980000 | 0.032866000  | -2.061069000 |
| H | -1.953842000 | 1.076593000  | -3.815804000 |
| H | -3.471666000 | 2.114447000  | -2.159953000 |
| H | -2.940999000 | 4.364752000  | -1.234253000 |
| H | -0.438790000 | 3.476629000  | -0.248207000 |
| H | 4.703143000  | 1.139591000  | 0.464041000  |
| C | 2.568170000  | -0.343006000 | -0.928477000 |
| H | 1.893127000  | -0.021350000 | -1.726939000 |
| C | 3.982225000  | -0.406795000 | -1.518643000 |
| H | 4.246271000  | 0.576015000  | -1.918600000 |
| H | 4.729796000  | -0.665490000 | -0.769154000 |

|    |              |              |              |
|----|--------------|--------------|--------------|
| H  | 4.066909000  | -1.124376000 | -2.325778000 |
| P  | 1.741316000  | -1.975362000 | -0.429993000 |
| C  | 1.525476000  | -2.900812000 | -2.103016000 |
| C  | 3.039028000  | -2.904246000 | 0.629928000  |
| C  | 2.726588000  | -2.977490000 | -3.061791000 |
| H  | 2.481095000  | -3.708767000 | -3.840778000 |
| H  | 2.898056000  | -2.026273000 | -3.568592000 |
| H  | 3.654375000  | -3.301092000 | -2.595617000 |
| C  | 0.403766000  | -2.218841000 | -2.901776000 |
| H  | -0.555491000 | -2.260934000 | -2.387916000 |
| H  | 0.632435000  | -1.172926000 | -3.122648000 |
| H  | 0.301160000  | -2.738944000 | -3.861064000 |
| C  | 1.078734000  | -4.334866000 | -1.780745000 |
| H  | 0.707608000  | -4.802283000 | -2.700329000 |
| H  | 1.908317000  | -4.945735000 | -1.417188000 |
| H  | 0.279244000  | -4.359594000 | -1.037485000 |
| C  | 2.361339000  | -4.043930000 | 1.403795000  |
| H  | 1.914379000  | -4.790983000 | 0.748146000  |
| H  | 3.123119000  | -4.543473000 | 2.014549000  |
| H  | 1.576513000  | -3.675347000 | 2.062668000  |
| C  | 4.221502000  | -3.513829000 | -0.135875000 |
| H  | 4.936264000  | -3.905465000 | 0.597888000  |
| H  | 3.912094000  | -4.353405000 | -0.761370000 |
| H  | 4.754874000  | -2.795644000 | -0.757488000 |
| C  | 3.590732000  | -1.914284000 | 1.669822000  |
| H  | 4.285525000  | -1.195521000 | 1.235283000  |
| H  | 2.794479000  | -1.363525000 | 2.176664000  |
| H  | 4.139595000  | -2.481140000 | 2.430353000  |
| Ir | -0.362095000 | -1.569188000 | 0.770492000  |
| Cl | -1.032255000 | -4.053144000 | 1.161385000  |
| H  | 0.519946000  | -1.549599000 | 2.175482000  |
| H  | -1.675421000 | -1.328136000 | 1.669475000  |

|   |              |              |              |
|---|--------------|--------------|--------------|
| H | -2.604069000 | -1.391990000 | -0.307717000 |
| H | -1.289992000 | -1.662608000 | -0.623676000 |
| C | -4.017026000 | -0.765466000 | -1.483285000 |
| O | -3.602449000 | -1.131049000 | -0.309950000 |
| O | -3.460883000 | -0.871154000 | -2.546334000 |
| C | -5.417740000 | -0.121124000 | -1.377761000 |
| F | -6.323289000 | -1.016300000 | -0.966179000 |
| F | -5.812761000 | 0.359186000  | -2.553142000 |
| F | -5.412437000 | 0.888031000  | -0.496449000 |

---

### G5c

---

| Coordinates (Angstroms) |              |              |              |
|-------------------------|--------------|--------------|--------------|
|                         | X            | Y            | Z            |
| C                       | -2.644809000 | -3.476133000 | 0.736263000  |
| C                       | -3.028278000 | -4.063050000 | -0.502374000 |
| H                       | -2.551565000 | -4.906238000 | -0.981021000 |
| C                       | -4.116474000 | -3.310975000 | -1.028165000 |
| H                       | -4.607012000 | -3.484259000 | -1.975116000 |
| C                       | -3.500180000 | -2.368529000 | 0.973749000  |
| H                       | -3.464797000 | -1.722213000 | 1.833450000  |
| C                       | -4.406520000 | -2.258125000 | -0.115396000 |
| H                       | -5.165810000 | -1.498962000 | -0.236599000 |
| H                       | -1.833433000 | -3.798302000 | 1.373239000  |
| C                       | -0.468562000 | -1.609563000 | -0.996362000 |
| C                       | -0.951577000 | -2.298200000 | -2.148450000 |
| C                       | -2.024773000 | -1.561357000 | -2.712045000 |
| H                       | -2.614316000 | -1.851496000 | -3.569679000 |
| C                       | -1.256837000 | -0.416282000 | -0.853520000 |
| C                       | -2.228265000 | -0.415277000 | -1.907814000 |
| H                       | -2.982847000 | 0.338441000  | -2.073226000 |
| Fe                      | -2.465834000 | -2.119647000 | -0.797705000 |
| P                       | -0.759097000 | 1.061337000  | 0.096787000  |



|   |              |              |              |
|---|--------------|--------------|--------------|
| C | -1.695335000 | 2.410336000  | -0.778760000 |
| C | -1.707127000 | 3.742641000  | 0.007124000  |
| C | -1.219967000 | 2.665534000  | -2.213921000 |
| C | -1.969726000 | 4.946151000  | -0.915718000 |
| H | -2.484259000 | 3.705461000  | 0.774598000  |
| C | -2.263949000 | 3.505936000  | -2.966633000 |
| H | -0.265415000 | 3.196297000  | -2.175315000 |
| C | -2.915728000 | 4.563984000  | -2.052595000 |
| H | -2.380627000 | 5.772524000  | -0.328552000 |
| H | -3.037214000 | 2.848747000  | -3.379146000 |
| H | -3.840356000 | 4.164879000  | -1.618543000 |
| C | -1.609741000 | 1.043903000  | 1.741367000  |
| C | -1.129850000 | -0.077998000 | 2.662081000  |
| C | -3.149671000 | 1.068776000  | 1.687419000  |
| C | -1.548826000 | 0.204048000  | 4.119082000  |
| H | -1.549924000 | -1.026388000 | 2.316604000  |
| C | -3.774444000 | 0.726823000  | 3.058340000  |
| H | -3.488739000 | 2.061094000  | 1.383874000  |
| C | -2.822491000 | 1.062850000  | 4.204495000  |
| H | -1.710803000 | -0.747589000 | 4.636313000  |
| H | -4.017640000 | -0.339545000 | 3.117512000  |
| H | -3.314209000 | 0.912181000  | 5.169988000  |
| H | -0.755780000 | 3.887736000  | 0.524808000  |
| H | -1.025963000 | 5.305768000  | -1.341267000 |
| H | -3.200892000 | 5.445458000  | -2.634097000 |
| H | -1.778802000 | 3.993677000  | -3.818482000 |
| H | -1.028608000 | 1.734367000  | -2.751296000 |
| H | -2.725706000 | 2.041707000  | -0.828534000 |
| H | -1.257063000 | 1.989693000  | 2.171700000  |
| H | -0.048377000 | -0.175498000 | 2.601084000  |
| H | -0.731885000 | 0.711861000  | 4.642398000  |
| H | -2.561662000 | 2.126278000  | 4.151654000  |

|   |              |              |              |
|---|--------------|--------------|--------------|
| H | -4.722161000 | 1.260637000  | 3.172561000  |
| H | -3.510815000 | 0.369947000  | 0.927342000  |
| H | -0.596851000 | -3.247756000 | -2.517157000 |
| C | 0.637755000  | -2.112567000 | -0.089093000 |
| H | 0.272216000  | -2.006587000 | 0.937627000  |
| C | 0.865561000  | -3.604716000 | -0.357754000 |
| H | -0.077915000 | -4.139562000 | -0.220622000 |
| H | 1.198436000  | -3.791564000 | -1.378685000 |
| H | 1.593865000  | -4.045409000 | 0.312263000  |
| P | 2.158405000  | -0.975848000 | -0.021484000 |
| C | 3.154634000  | -1.638567000 | 1.488570000  |
| C | 3.163407000  | -1.345203000 | -1.612103000 |
| C | 3.420163000  | -3.151027000 | 1.601277000  |
| H | 4.188398000  | -3.293936000 | 2.370493000  |
| H | 2.535448000  | -3.691069000 | 1.942728000  |
| H | 3.785942000  | -3.615890000 | 0.689274000  |
| C | 2.407495000  | -1.260028000 | 2.776238000  |
| H | 2.286730000  | -0.183434000 | 2.887615000  |
| H | 1.421306000  | -1.729525000 | 2.827574000  |
| H | 2.986504000  | -1.630653000 | 3.630049000  |
| C | 4.510543000  | -0.916154000 | 1.493194000  |
| H | 4.988392000  | -1.072020000 | 2.467598000  |
| H | 5.186667000  | -1.315534000 | 0.733525000  |
| H | 4.403480000  | 0.158310000  | 1.331816000  |
| C | 4.189262000  | -0.227554000 | -1.851741000 |
| H | 4.918943000  | -0.144010000 | -1.046776000 |
| H | 4.732552000  | -0.454782000 | -2.777013000 |
| H | 3.710052000  | 0.744058000  | -1.963374000 |
| C | 3.925947000  | -2.676921000 | -1.633649000 |
| H | 4.353605000  | -2.809901000 | -2.634637000 |
| H | 4.757164000  | -2.681411000 | -0.926502000 |
| H | 3.293025000  | -3.540629000 | -1.431857000 |

|    |             |              |              |
|----|-------------|--------------|--------------|
| C  | 2.187667000 | -1.330401000 | -2.800162000 |
| H  | 1.580973000 | -2.234660000 | -2.846701000 |
| H  | 1.521012000 | -0.464583000 | -2.775401000 |
| H  | 2.768658000 | -1.277956000 | -3.727985000 |
| Ir | 1.459838000 | 1.373770000  | 0.158342000  |
| Cl | 3.846962000 | 2.436385000  | 0.344216000  |
| H  | 1.517677000 | 1.499867000  | -1.513195000 |
| H  | 1.434419000 | 1.421633000  | 1.824711000  |
| H  | 1.036382000 | 2.926281000  | 0.207503000  |

---

**TS<sub>G3c-G4c</sub>**

| Coordinates (Angstroms) |              |              |              |
|-------------------------|--------------|--------------|--------------|
|                         | X            | Y            | Z            |
| C                       | -2.932067000 | -2.800545000 | -2.340757000 |
| C                       | -4.092546000 | -3.271543000 | -1.664471000 |
| H                       | -5.089368000 | -2.864785000 | -1.755495000 |
| C                       | -3.698687000 | -4.333240000 | -0.802852000 |
| H                       | -4.346237000 | -4.876668000 | -0.129962000 |
| C                       | -1.827809000 | -3.577106000 | -1.901075000 |
| H                       | -0.810902000 | -3.468165000 | -2.238384000 |
| C                       | -2.295330000 | -4.520465000 | -0.946568000 |
| H                       | -1.689949000 | -5.238900000 | -0.412683000 |
| H                       | -2.891404000 | -1.981986000 | -3.045071000 |
| C                       | -2.554295000 | -0.591209000 | 0.137969000  |
| C                       | -3.747238000 | -1.148716000 | 0.688108000  |
| C                       | -3.402437000 | -2.192057000 | 1.584487000  |
| H                       | -4.094745000 | -2.821238000 | 2.124844000  |
| C                       | -1.449292000 | -1.302178000 | 0.723779000  |
| C                       | -1.992675000 | -2.301440000 | 1.595778000  |
| H                       | -1.424091000 | -3.010229000 | 2.178311000  |
| Fe                      | -2.717439000 | -2.605928000 | -0.301631000 |
| P                       | 0.280399000  | -0.731135000 | 0.768270000  |

|   |              |              |              |
|---|--------------|--------------|--------------|
| C | 0.937188000  | -1.534114000 | 2.308807000  |
| C | 2.481913000  | -1.468603000 | 2.392470000  |
| C | 0.317005000  | -0.980660000 | 3.595889000  |
| C | 2.976566000  | -1.535410000 | 3.846685000  |
| H | 2.910349000  | -2.304176000 | 1.832306000  |
| C | 0.660072000  | -1.894104000 | 4.783303000  |
| H | 0.711823000  | 0.023579000  | 3.767659000  |
| C | 2.090676000  | -2.461421000 | 4.678074000  |
| H | 4.016415000  | -1.874752000 | 3.861079000  |
| H | -0.060492000 | -2.717360000 | 4.835320000  |
| H | 2.067958000  | -3.446421000 | 4.196580000  |
| C | 1.225107000  | -1.614173000 | -0.558534000 |
| C | 0.752864000  | -1.178028000 | -1.951213000 |
| C | 1.259500000  | -3.141937000 | -0.386488000 |
| C | 1.476362000  | -1.923254000 | -3.098893000 |
| H | -0.325770000 | -1.332864000 | -2.029846000 |
| C | 1.942774000  | -3.858754000 | -1.579303000 |
| H | 1.799732000  | -3.389189000 | 0.527529000  |
| C | 2.547881000  | -2.883046000 | -2.587279000 |
| H | 0.748230000  | -2.502870000 | -3.678113000 |
| H | 1.210120000  | -4.481049000 | -2.105926000 |
| H | 2.986968000  | -3.434493000 | -3.424437000 |
| H | 2.856300000  | -0.553792000 | 1.926789000  |
| H | 2.969313000  | -0.534113000 | 4.292189000  |
| H | 2.514324000  | -2.612807000 | 5.674980000  |
| H | 0.550749000  | -1.323134000 | 5.711015000  |
| H | -0.766938000 | -0.873446000 | 3.504679000  |
| H | 0.649034000  | -2.586557000 | 2.224916000  |
| H | 2.242136000  | -1.234641000 | -0.413141000 |
| H | 0.921050000  | -0.107477000 | -2.044506000 |
| H | 1.918875000  | -1.201428000 | -3.790230000 |
| H | 3.364891000  | -2.319920000 | -2.123365000 |

|   |              |              |              |
|---|--------------|--------------|--------------|
| H | 2.713313000  | -4.540294000 | -1.208091000 |
| H | 0.244354000  | -3.520629000 | -0.251525000 |
| H | -4.756800000 | -0.865582000 | 0.435318000  |
| C | -2.527539000 | 0.495553000  | -0.922735000 |
| H | -1.873634000 | 0.139542000  | -1.724228000 |
| C | -3.934580000 | 0.653477000  | -1.512785000 |
| H | -4.260620000 | -0.307865000 | -1.918760000 |
| H | -4.664463000 | 0.954227000  | -0.761332000 |
| H | -3.973200000 | 1.379385000  | -2.315811000 |
| P | -1.599083000 | 2.066847000  | -0.412387000 |
| C | -1.321656000 | 2.994623000  | -2.073660000 |
| C | -2.825561000 | 3.063920000  | 0.663909000  |
| C | -2.512419000 | 3.141993000  | -3.036542000 |
| H | -2.221533000 | 3.860143000  | -3.811826000 |
| H | -2.735820000 | 2.203277000  | -3.546501000 |
| H | -3.421883000 | 3.517325000  | -2.572508000 |
| C | -0.233488000 | 2.259056000  | -2.871670000 |
| H | 0.729825000  | 2.262657000  | -2.364104000 |
| H | -0.507915000 | 1.223164000  | -3.087528000 |
| H | -0.110321000 | 2.769828000  | -3.833341000 |
| C | -0.797494000 | 4.400074000  | -1.741738000 |
| H | -0.402805000 | 4.851405000  | -2.659551000 |
| H | -1.590567000 | 5.054624000  | -1.372969000 |
| H | 0.005018000  | 4.376108000  | -1.001765000 |
| C | -2.078482000 | 4.152738000  | 1.447182000  |
| H | -1.570071000 | 4.864995000  | 0.797950000  |
| H | -2.811251000 | 4.705755000  | 2.046950000  |
| H | -1.332447000 | 3.731121000  | 2.119852000  |
| C | -3.969249000 | 3.751304000  | -0.095285000 |
| H | -4.658721000 | 4.178993000  | 0.642286000  |
| H | -3.610257000 | 4.575671000  | -0.714086000 |
| H | -4.544943000 | 3.071824000  | -0.722202000 |

|    |              |              |              |
|----|--------------|--------------|--------------|
| C  | -3.436266000 | 2.098888000  | 1.693835000  |
| H  | -4.166518000 | 1.422992000  | 1.249017000  |
| H  | -2.675666000 | 1.500826000  | 2.201743000  |
| H  | -3.957431000 | 2.690164000  | 2.455168000  |
| Ir | 0.479871000  | 1.510756000  | 0.783950000  |
| Cl | 1.322135000  | 3.925148000  | 1.154905000  |
| H  | -0.405764000 | 1.544798000  | 2.153189000  |
| H  | 1.756634000  | 1.194598000  | 1.706555000  |
| H  | 2.371690000  | 1.311575000  | -0.369336000 |
| H  | 1.370349000  | 1.545718000  | -0.667941000 |
| C  | 3.957881000  | 0.630076000  | -1.526239000 |
| O  | 3.536816000  | 1.023350000  | -0.386854000 |
| O  | 3.445097000  | 0.753198000  | -2.621347000 |
| C  | 5.324137000  | -0.089909000 | -1.404076000 |
| F  | 6.279222000  | 0.767837000  | -1.014735000 |
| F  | 5.707511000  | -0.628174000 | -2.562079000 |
| F  | 5.274401000  | -1.074757000 | -0.492976000 |

---

## II

| Coordinates (Angstroms) |              |              |              |
|-------------------------|--------------|--------------|--------------|
|                         | X            | Y            | Z            |
| C                       | -3.531676000 | 3.183761000  | -0.551757000 |
| C                       | -2.576279000 | 2.342761000  | 0.003326000  |
| C                       | -2.696800000 | 0.958001000  | -0.039172000 |
| C                       | -3.796790000 | 0.378101000  | -0.676606000 |
| C                       | -4.766885000 | 1.202342000  | -1.247859000 |
| C                       | -4.620567000 | 2.586751000  | -1.170520000 |
| H                       | -3.414276000 | 4.259006000  | -0.503025000 |
| H                       | -5.630010000 | 0.784439000  | -1.748107000 |
| H                       | -5.382424000 | 3.215481000  | -1.618367000 |
| O                       | -3.833611000 | -0.969491000 | -0.683340000 |
| C                       | -4.926962000 | -1.620139000 | -1.320243000 |

|   |              |              |              |
|---|--------------|--------------|--------------|
| H | -5.873514000 | -1.358859000 | -0.838534000 |
| H | -4.966558000 | -1.371961000 | -2.384810000 |
| H | -4.741582000 | -2.686343000 | -1.202214000 |
| O | -1.481164000 | 2.851747000  | 0.633250000  |
| P | -1.307696000 | 0.178002000  | 0.812749000  |
| C | -0.466773000 | 1.854920000  | 0.832247000  |
| C | -1.861441000 | -0.081504000 | 2.581218000  |
| C | -2.464909000 | 1.180167000  | 3.202210000  |
| H | -3.335472000 | 1.529099000  | 2.639715000  |
| H | -2.798918000 | 0.947762000  | 4.219160000  |
| H | -1.743076000 | 1.997560000  | 3.271989000  |
| C | -2.908032000 | -1.202088000 | 2.577087000  |
| H | -2.527701000 | -2.109066000 | 2.101053000  |
| H | -3.175435000 | -1.440999000 | 3.612167000  |
| H | -3.819564000 | -0.893797000 | 2.057504000  |
| C | -0.614808000 | -0.519282000 | 3.359473000  |
| H | -0.191686000 | -1.442846000 | 2.952749000  |
| H | 0.164818000  | 0.249529000  | 3.344696000  |
| H | -0.882979000 | -0.702418000 | 4.405068000  |
| C | 3.711709000  | 2.563314000  | 1.578008000  |
| C | 4.740022000  | 1.713656000  | 1.960100000  |
| C | 4.810102000  | 0.387564000  | 1.534090000  |
| C | 3.821977000  | -0.111956000 | 0.686302000  |
| C | 2.782310000  | 0.730197000  | 0.281492000  |
| C | 2.736224000  | 2.042526000  | 0.738691000  |
| H | 3.653956000  | 3.588353000  | 1.921829000  |
| O | 3.782641000  | -1.374190000 | 0.212512000  |
| C | 4.825354000  | -2.272042000 | 0.578447000  |
| H | 4.591270000  | -3.211564000 | 0.081091000  |
| H | 5.795577000  | -1.906076000 | 0.230706000  |
| H | 4.848223000  | -2.427049000 | 1.660870000  |
| C | 2.904790000  | -0.418962000 | -2.956296000 |

|    |              |              |              |
|----|--------------|--------------|--------------|
| H  | 2.427048000  | -1.398188000 | -2.882403000 |
| H  | 3.209393000  | -0.264945000 | -3.996544000 |
| H  | 3.806943000  | -0.424540000 | -2.338358000 |
| C  | 0.716179000  | 0.715470000  | -3.459755000 |
| H  | -0.022688000 | 1.458701000  | -3.143501000 |
| H  | 1.026164000  | 0.964573000  | -4.479611000 |
| H  | 0.231926000  | -0.263229000 | -3.482405000 |
| C  | 2.683840000  | 2.054632000  | -2.652585000 |
| H  | 2.032649000  | 2.903028000  | -2.428167000 |
| H  | 3.552762000  | 2.094770000  | -1.990077000 |
| H  | 3.043663000  | 2.178375000  | -3.678810000 |
| C  | 1.951532000  | 0.711052000  | -2.552107000 |
| P  | 1.377550000  | 0.402064000  | -0.801991000 |
| O  | 1.696318000  | 2.813166000  | 0.312897000  |
| C  | 0.625335000  | 2.023054000  | -0.228226000 |
| H  | 5.513166000  | 2.086702000  | 2.622872000  |
| H  | 5.626150000  | -0.237902000 | 1.869539000  |
| Ir | 0.112909000  | -1.374805000 | -0.316910000 |
| H  | -0.698476000 | -1.091943000 | -1.591167000 |
| H  | 1.085794000  | -2.306375000 | -1.217061000 |
| Cl | -1.124514000 | -3.479279000 | 0.228783000  |
| H  | 0.213438000  | 2.570327000  | -1.076231000 |
| H  | -0.021803000 | 2.033500000  | 1.811855000  |

---

## I2

| Coordinates (Angstroms) |              |             |              |
|-------------------------|--------------|-------------|--------------|
|                         | X            | Y           | Z            |
| C                       | -4.424771000 | 2.639551000 | 1.796986000  |
| C                       | -3.348284000 | 1.763897000 | 1.779754000  |
| C                       | -3.232185000 | 0.763039000 | 0.823839000  |
| C                       | -4.192456000 | 0.648873000 | -0.188821000 |
| C                       | -5.276403000 | 1.523630000 | -0.195830000 |



|   |              |              |              |
|---|--------------|--------------|--------------|
| C | -5.376758000 | 2.495596000  | 0.799195000  |
| H | -4.496740000 | 3.408017000  | 2.555877000  |
| H | -6.038801000 | 1.459937000  | -0.960135000 |
| H | -6.226217000 | 3.169466000  | 0.782130000  |
| O | -3.975964000 | -0.314264000 | -1.098894000 |
| C | -4.909075000 | -0.479455000 | -2.161925000 |
| H | -5.898917000 | -0.737499000 | -1.775563000 |
| H | -4.967232000 | 0.424515000  | -2.774492000 |
| H | -4.524605000 | -1.302562000 | -2.761615000 |
| O | -2.357260000 | 1.871337000  | 2.704919000  |
| P | -1.722823000 | -0.164691000 | 1.079837000  |
| C | -1.222669000 | 1.044140000  | 2.440095000  |
| C | -2.116335000 | -1.774721000 | 1.943104000  |
| C | -2.833788000 | -1.487615000 | 3.269292000  |
| H | -3.727443000 | -0.873369000 | 3.127246000  |
| H | -3.156831000 | -2.446055000 | 3.686675000  |
| H | -2.189536000 | -1.013182000 | 4.011469000  |
| C | -3.045446000 | -2.620064000 | 1.065460000  |
| H | -2.621632000 | -2.813612000 | 0.080774000  |
| H | -3.205322000 | -3.580371000 | 1.565880000  |
| H | -4.018331000 | -2.137497000 | 0.942157000  |
| C | -0.783036000 | -2.487474000 | 2.194744000  |
| H | -0.297505000 | -2.772307000 | 1.257850000  |
| H | -0.093442000 | -1.862011000 | 2.771464000  |
| H | -0.970587000 | -3.399649000 | 2.769223000  |
| C | 3.469421000  | 1.337125000  | 2.961831000  |
| C | 4.642813000  | 1.323319000  | 2.222479000  |
| C | 4.654281000  | 1.453915000  | 0.833639000  |
| C | 3.447978000  | 1.600302000  | 0.153185000  |
| C | 2.255566000  | 1.639487000  | 0.881691000  |
| C | 2.279752000  | 1.494682000  | 2.264612000  |
| H | 3.466182000  | 1.232023000  | 4.039297000  |

|    |              |              |              |
|----|--------------|--------------|--------------|
| O  | 3.322066000  | 1.712526000  | -1.182941000 |
| C  | 4.505201000  | 1.769338000  | -1.976138000 |
| H  | 4.164909000  | 1.896236000  | -3.002125000 |
| H  | 5.124845000  | 2.622672000  | -1.687090000 |
| H  | 5.077139000  | 0.841567000  | -1.890972000 |
| C  | 0.470978000  | 3.182966000  | -2.040646000 |
| H  | -0.135131000 | 2.389876000  | -2.486088000 |
| H  | 0.223507000  | 4.122009000  | -2.545341000 |
| H  | 1.524641000  | 2.963879000  | -2.221752000 |
| C  | -1.320451000 | 3.622433000  | -0.339734000 |
| H  | -1.566949000 | 3.794707000  | 0.710970000  |
| H  | -1.581861000 | 4.529079000  | -0.893584000 |
| H  | -1.943352000 | 2.806441000  | -0.715986000 |
| C  | 1.025415000  | 4.466416000  | 0.052363000  |
| H  | 0.863375000  | 4.582199000  | 1.127483000  |
| H  | 2.091076000  | 4.298338000  | -0.121920000 |
| H  | 0.746782000  | 5.408825000  | -0.429265000 |
| C  | 0.174986000  | 3.343276000  | -0.545532000 |
| P  | 0.558722000  | 1.741448000  | 0.316847000  |
| O  | 1.087348000  | 1.489726000  | 2.915682000  |
| C  | -0.012423000 | 1.902218000  | 2.095579000  |
| H  | 5.588956000  | 1.207183000  | 2.739241000  |
| H  | 5.596307000  | 1.437924000  | 0.302891000  |
| Ir | -0.245507000 | -0.191207000 | -0.585878000 |
| H  | -1.290162000 | 0.651580000  | -1.320521000 |
| Cl | -0.985920000 | -2.293499000 | -1.761646000 |
| H  | -0.239922000 | 2.944310000  | 2.329500000  |
| H  | -0.986650000 | 0.498787000  | 3.352542000  |

---

**I3**

---

Coordinates (Angstroms)

| X | Y | Z |
|---|---|---|
|---|---|---|

---

---

|   |              |              |              |
|---|--------------|--------------|--------------|
| C | -4.391522000 | 2.621669000  | 1.762515000  |
| C | -3.330372000 | 1.727536000  | 1.773969000  |
| C | -3.205743000 | 0.721269000  | 0.825302000  |
| C | -4.144729000 | 0.617796000  | -0.207699000 |
| C | -5.212502000 | 1.512119000  | -0.245593000 |
| C | -5.320584000 | 2.491101000  | 0.741531000  |
| H | -4.466475000 | 3.396674000  | 2.514467000  |
| H | -5.956966000 | 1.458027000  | -1.028131000 |
| H | -6.155768000 | 3.181481000  | 0.698883000  |
| O | -3.926151000 | -0.356043000 | -1.107018000 |
| C | -4.831082000 | -0.502309000 | -2.196631000 |
| H | -5.838313000 | -0.734628000 | -1.839897000 |
| H | -4.849130000 | 0.400487000  | -2.813604000 |
| H | -4.449367000 | -1.336961000 | -2.781942000 |
| O | -2.356713000 | 1.822089000  | 2.719385000  |
| P | -1.698805000 | -0.213110000 | 1.101812000  |
| C | -1.210755000 | 1.011114000  | 2.450833000  |
| C | -2.112027000 | -1.803701000 | 1.985157000  |
| C | -2.869812000 | -1.502020000 | 3.284189000  |
| H | -3.773868000 | -0.914387000 | 3.100884000  |
| H | -3.179972000 | -2.455686000 | 3.722096000  |
| H | -2.257739000 | -0.988097000 | 4.027862000  |
| C | -3.006039000 | -2.665406000 | 1.086374000  |
| H | -2.541345000 | -2.875849000 | 0.123327000  |
| H | -3.188720000 | -3.616421000 | 1.596857000  |
| H | -3.972134000 | -2.184244000 | 0.913474000  |
| C | -0.780999000 | -2.503287000 | 2.280805000  |
| H | -0.259866000 | -2.777117000 | 1.359323000  |
| H | -0.118700000 | -1.872474000 | 2.883220000  |
| H | -0.977239000 | -3.419928000 | 2.845301000  |
| C | 3.471093000  | 1.287660000  | 2.925341000  |
| C | 4.634673000  | 1.246170000  | 2.172111000  |

|    |              |              |              |
|----|--------------|--------------|--------------|
| C  | 4.633717000  | 1.389933000  | 0.784496000  |
| C  | 3.425676000  | 1.586804000  | 0.120074000  |
| C  | 2.242910000  | 1.658436000  | 0.863917000  |
| C  | 2.278932000  | 1.488431000  | 2.243516000  |
| H  | 3.476306000  | 1.165623000  | 4.000989000  |
| O  | 3.289446000  | 1.716708000  | -1.212343000 |
| C  | 4.458417000  | 1.658255000  | -2.025909000 |
| H  | 4.109726000  | 1.783494000  | -3.049235000 |
| H  | 5.149630000  | 2.466108000  | -1.771586000 |
| H  | 4.956042000  | 0.690278000  | -1.922370000 |
| C  | 0.457433000  | 3.271123000  | -2.015083000 |
| H  | -0.156784000 | 2.507175000  | -2.497713000 |
| H  | 0.233523000  | 4.232066000  | -2.488052000 |
| H  | 1.509911000  | 3.040930000  | -2.190910000 |
| C  | -1.360906000 | 3.631228000  | -0.326910000 |
| H  | -1.621928000 | 3.786323000  | 0.722831000  |
| H  | -1.634989000 | 4.538127000  | -0.874122000 |
| H  | -1.960704000 | 2.805566000  | -0.719843000 |
| C  | 0.969008000  | 4.506920000  | 0.113645000  |
| H  | 0.789302000  | 4.602432000  | 1.187765000  |
| H  | 2.039069000  | 4.352761000  | -0.047272000 |
| H  | 0.687443000  | 5.454293000  | -0.356016000 |
| C  | 0.141934000  | 3.385257000  | -0.519814000 |
| P  | 0.542863000  | 1.774444000  | 0.315056000  |
| O  | 1.094487000  | 1.492198000  | 2.907436000  |
| C  | -0.018074000 | 1.893492000  | 2.100728000  |
| H  | 5.582461000  | 1.093841000  | 2.676370000  |
| H  | 5.568415000  | 1.346143000  | 0.242463000  |
| Ir | -0.187465000 | -0.164382000 | -0.635887000 |
| H  | -1.322797000 | 0.614044000  | -1.321672000 |
| H  | 0.903075000  | 0.424200000  | -2.022492000 |
| Cl | -0.891272000 | -2.300219000 | -1.745357000 |

|   |              |              |              |
|---|--------------|--------------|--------------|
| H | -0.262832000 | 2.928088000  | 2.349694000  |
| H | -0.960458000 | 0.474842000  | 3.365334000  |
| H | 0.921295000  | -0.377379000 | -2.099781000 |

---

**TS11-12**

| Coordinates (Angstroms) |              |              |              |
|-------------------------|--------------|--------------|--------------|
|                         | X            | Y            | Z            |
| C                       | -4.225148000 | 2.766916000  | 1.663497000  |
| C                       | -3.202368000 | 1.828647000  | 1.634062000  |
| C                       | -3.192803000 | 0.777089000  | 0.727875000  |
| C                       | -4.212369000 | 0.674245000  | -0.223473000 |
| C                       | -5.255808000 | 1.597809000  | -0.207609000 |
| C                       | -5.244982000 | 2.625165000  | 0.734318000  |
| H                       | -4.209210000 | 3.576179000  | 2.382536000  |
| H                       | -6.062780000 | 1.535964000  | -0.924537000 |
| H                       | -6.058064000 | 3.342781000  | 0.730776000  |
| O                       | -4.094945000 | -0.330350000 | -1.112075000 |
| C                       | -5.195013000 | -0.617074000 | -1.968258000 |
| H                       | -6.075557000 | -0.895021000 | -1.380922000 |
| H                       | -5.431992000 | 0.232186000  | -2.611903000 |
| H                       | -4.881289000 | -1.462060000 | -2.578717000 |
| O                       | -2.153081000 | 1.928836000  | 2.493966000  |
| P                       | -1.752869000 | -0.271657000 | 0.991022000  |
| C                       | -1.140631000 | 0.940865000  | 2.286805000  |
| C                       | -2.337267000 | -1.749360000 | 1.990933000  |
| C                       | -3.041931000 | -1.289797000 | 3.274390000  |
| H                       | -3.867459000 | -0.604536000 | 3.062338000  |
| H                       | -3.464410000 | -2.173454000 | 3.763133000  |
| H                       | -2.367376000 | -0.817909000 | 3.991051000  |
| C                       | -3.337289000 | -2.575639000 | 1.173517000  |
| H                       | -2.923134000 | -2.898378000 | 0.219494000  |
| H                       | -3.602235000 | -3.465413000 | 1.754712000  |

|   |              |              |              |
|---|--------------|--------------|--------------|
| H | -4.256710000 | -2.014039000 | 0.987368000  |
| C | -1.086537000 | -2.567234000 | 2.328527000  |
| H | -0.614877000 | -2.963619000 | 1.425536000  |
| H | -0.348670000 | -1.968155000 | 2.873177000  |
| H | -1.367978000 | -3.411346000 | 2.966120000  |
| C | 3.584943000  | 0.713411000  | 2.661654000  |
| C | 4.777796000  | 0.931474000  | 1.988664000  |
| C | 4.810385000  | 1.431492000  | 0.689251000  |
| C | 3.615413000  | 1.690897000  | 0.018527000  |
| C | 2.397043000  | 1.432900000  | 0.658126000  |
| C | 2.410919000  | 0.991490000  | 1.978224000  |
| H | 3.555348000  | 0.365227000  | 3.686374000  |
| O | 3.543276000  | 2.203986000  | -1.221760000 |
| C | 4.732022000  | 2.669516000  | -1.847568000 |
| H | 4.421782000  | 3.056266000  | -2.817114000 |
| H | 5.187650000  | 3.472538000  | -1.260998000 |
| H | 5.454448000  | 1.862434000  | -1.993058000 |
| C | 0.768951000  | 3.229018000  | -2.086812000 |
| H | 0.510665000  | 2.299839000  | -2.588606000 |
| H | 0.269820000  | 4.051132000  | -2.608674000 |
| H | 1.845408000  | 3.368259000  | -2.164252000 |
| C | -1.211088000 | 3.409261000  | -0.561266000 |
| H | -1.562698000 | 3.462929000  | 0.470883000  |
| H | -1.458382000 | 4.357835000  | -1.047213000 |
| H | -1.753570000 | 2.611957000  | -1.076176000 |
| C | 1.018819000  | 4.314717000  | 0.158672000  |
| H | 0.662531000  | 4.393451000  | 1.188467000  |
| H | 2.101955000  | 4.171548000  | 0.172153000  |
| H | 0.813338000  | 5.270293000  | -0.334887000 |
| C | 0.307863000  | 3.208800000  | -0.626058000 |
| P | 0.671640000  | 1.524542000  | 0.097880000  |
| O | 1.202919000  | 0.846011000  | 2.590543000  |

|    |              |              |              |
|----|--------------|--------------|--------------|
| C  | 0.177273000  | 1.589374000  | 1.914653000  |
| H  | 5.716204000  | 0.732467000  | 2.494197000  |
| H  | 5.763181000  | 1.623129000  | 0.214911000  |
| Ir | -0.228849000 | -0.402995000 | -0.778719000 |
| H  | -1.244497000 | 0.454158000  | -1.531366000 |
| H  | 0.744500000  | -0.467407000 | -2.231635000 |
| Cl | -1.140572000 | -2.566882000 | -1.519909000 |
| H  | 0.193768000  | 2.619708000  | 2.279381000  |
| H  | -0.980330000 | 0.429673000  | 3.235456000  |
| C  | -1.264457000 | 1.674659000  | -4.386584000 |
| C  | 0.032696000  | 1.079472000  | -4.920002000 |
| C  | -0.969671000 | -1.097637000 | -4.920704000 |
| C  | -2.273327000 | -0.498998000 | -4.414427000 |
| C  | -3.667079000 | 1.461577000  | -4.573845000 |
| C  | -3.877064000 | 2.489580000  | -3.650506000 |
| C  | -5.144141000 | 3.028047000  | -3.444091000 |
| C  | -6.239282000 | 2.539757000  | -4.141299000 |
| C  | -6.060378000 | 1.511412000  | -5.063390000 |
| C  | -4.795098000 | 1.004666000  | -5.265101000 |
| H  | -1.349216000 | 2.700910000  | -4.750889000 |
| H  | 0.876686000  | 1.682233000  | -4.600973000 |
| H  | -0.977796000 | -1.108239000 | -6.016213000 |
| H  | -2.305843000 | -0.562100000 | -3.318432000 |
| H  | -3.041233000 | 2.878638000  | -3.082593000 |
| H  | -5.269173000 | 3.824339000  | -2.719114000 |
| H  | -7.227879000 | 2.953120000  | -3.979759000 |
| H  | -6.887207000 | 1.108779000  | -5.636934000 |
| N  | -2.404943000 | 0.897209000  | -4.852500000 |
| N  | 0.188195000  | -0.308460000 | -4.496537000 |
| H  | -3.096396000 | -1.089635000 | -4.815424000 |
| H  | -0.896604000 | -2.122077000 | -4.575161000 |
| H  | 0.010550000  | 1.094562000  | -6.014964000 |

|   |              |              |              |
|---|--------------|--------------|--------------|
| H | -1.229186000 | 1.703720000  | -3.289838000 |
| C | 1.146321000  | -0.748474000 | -3.652765000 |
| C | 1.353242000  | -2.254100000 | -3.619640000 |
| C | 2.447235000  | 0.043195000  | -3.581948000 |
| C | 2.372745000  | -2.747090000 | -2.602660000 |
| H | 0.414881000  | -2.770942000 | -3.449746000 |
| C | 3.450664000  | -0.515396000 | -2.574278000 |
| H | 2.874192000  | -0.006716000 | -4.592258000 |
| C | 3.694716000  | -2.008069000 | -2.737065000 |
| H | 1.970552000  | -2.605538000 | -1.592786000 |
| H | 3.078539000  | -0.331353000 | -1.562183000 |
| H | 4.408941000  | -2.353773000 | -1.983971000 |
| H | 2.263856000  | 1.092009000  | -3.356986000 |
| H | 1.695306000  | -2.506270000 | -4.632160000 |
| H | 2.503951000  | -3.823482000 | -2.744472000 |
| H | 4.136439000  | -2.212104000 | -3.720488000 |
| H | 4.384470000  | 0.039777000  | -2.679199000 |
| F | -4.636078000 | 0.023474000  | -6.182633000 |

---

**TS<sub>13-II</sub>**

| Coordinates (Angstroms) |              |              |              |
|-------------------------|--------------|--------------|--------------|
|                         | X            | Y            | Z            |
| C                       | -4.294354000 | 2.838214000  | 1.684784000  |
| C                       | -3.296413000 | 1.872027000  | 1.680284000  |
| C                       | -3.355065000 | 0.757470000  | 0.854423000  |
| C                       | -4.423814000 | 0.611224000  | -0.037110000 |
| C                       | -5.433476000 | 1.571319000  | -0.056023000 |
| C                       | -5.353533000 | 2.663263000  | 0.807780000  |
| H                       | -4.226209000 | 3.696329000  | 2.341337000  |
| H                       | -6.273685000 | 1.483749000  | -0.731381000 |
| H                       | -6.144664000 | 3.404534000  | 0.782932000  |
| O                       | -4.383935000 | -0.475133000 | -0.828817000 |



|   |              |              |              |
|---|--------------|--------------|--------------|
| C | -5.427401000 | -0.676476000 | -1.774984000 |
| H | -6.393634000 | -0.786755000 | -1.274821000 |
| H | -5.467501000 | 0.145571000  | -2.495053000 |
| H | -5.178192000 | -1.601482000 | -2.292107000 |
| O | -2.205628000 | 2.011588000  | 2.477463000  |
| P | -1.880287000 | -0.252056000 | 1.045259000  |
| C | -1.206866000 | 1.007149000  | 2.281999000  |
| C | -2.278507000 | -1.756083000 | 2.075833000  |
| C | -3.038976000 | -1.370860000 | 3.347979000  |
| H | -3.971354000 | -0.847649000 | 3.117239000  |
| H | -3.296040000 | -2.288042000 | 3.887620000  |
| H | -2.449091000 | -0.749491000 | 4.025493000  |
| C | -3.138067000 | -2.714949000 | 1.245856000  |
| H | -2.661831000 | -2.974111000 | 0.298669000  |
| H | -3.287271000 | -3.635066000 | 1.820531000  |
| H | -4.119802000 | -2.284559000 | 1.035044000  |
| C | -0.929669000 | -2.403611000 | 2.415646000  |
| H | -0.394492000 | -2.710677000 | 1.511802000  |
| H | -0.282675000 | -1.729580000 | 2.986486000  |
| H | -1.103906000 | -3.296214000 | 3.024483000  |
| C | 3.524467000  | 0.665570000  | 2.536587000  |
| C | 4.673797000  | 0.639487000  | 1.759771000  |
| C | 4.655712000  | 0.918281000  | 0.394279000  |
| C | 3.446646000  | 1.223669000  | -0.226665000 |
| C | 2.274331000  | 1.248789000  | 0.535652000  |
| C | 2.332645000  | 0.976356000  | 1.898146000  |
| H | 3.543409000  | 0.463227000  | 3.599961000  |
| O | 3.312429000  | 1.511701000  | -1.534720000 |
| C | 4.488475000  | 1.709309000  | -2.316174000 |
| H | 4.139055000  | 2.008678000  | -3.302269000 |
| H | 5.106227000  | 2.503892000  | -1.888794000 |
| H | 5.066991000  | 0.786303000  | -2.398688000 |

|    |              |              |              |
|----|--------------|--------------|--------------|
| C  | 0.439337000  | 2.925561000  | -2.299055000 |
| H  | -0.290603000 | 2.229577000  | -2.717590000 |
| H  | 0.292546000  | 3.899504000  | -2.776614000 |
| H  | 1.440883000  | 2.569960000  | -2.544949000 |
| C  | -1.200028000 | 3.500334000  | -0.492540000 |
| H  | -1.366254000 | 3.692807000  | 0.570280000  |
| H  | -1.421974000 | 4.423014000  | -1.037362000 |
| H  | -1.909349000 | 2.736435000  | -0.823817000 |
| C  | 1.224102000  | 4.149330000  | -0.247676000 |
| H  | 1.147886000  | 4.270911000  | 0.836170000  |
| H  | 2.259663000  | 3.906239000  | -0.497670000 |
| H  | 0.983970000  | 5.113122000  | -0.707604000 |
| C  | 0.251485000  | 3.096737000  | -0.786572000 |
| P  | 0.553521000  | 1.463132000  | 0.055626000  |
| O  | 1.160919000  | 1.008745000  | 2.591908000  |
| C  | 0.105364000  | 1.654552000  | 1.867111000  |
| H  | 5.622282000  | 0.404528000  | 2.229825000  |
| H  | 5.578581000  | 0.896528000  | -0.168944000 |
| Ir | -0.438379000 | -0.387128000 | -0.806078000 |
| H  | -1.410231000 | 0.547639000  | -1.535796000 |
| H  | 0.478878000  | -0.208325000 | -2.218777000 |
| Cl | -1.410903000 | -2.370031000 | -1.929520000 |
| H  | 0.087638000  | 2.711188000  | 2.147101000  |
| H  | -1.033605000 | 0.522090000  | 3.242697000  |
| H  | 1.179641000  | -0.770301000 | -1.853333000 |
| C  | 3.265464000  | -1.504974000 | -2.368095000 |
| O  | 2.284567000  | -1.482601000 | -1.561223000 |
| O  | 4.426419000  | -1.777263000 | -2.115996000 |
| C  | 2.898612000  | -1.189244000 | -3.847295000 |
| F  | 2.290050000  | 0.003360000  | -3.975531000 |
| F  | 2.049003000  | -2.114483000 | -4.324017000 |
| F  | 3.971252000  | -1.174954000 | -4.636794000 |

---

**J1**

---

| Coordinates (Angstroms) |              |              |              |
|-------------------------|--------------|--------------|--------------|
|                         | X            | Y            | Z            |
| C                       | -4.274887000 | 1.679284000  | 2.226688000  |
| C                       | -3.191317000 | 0.868716000  | 1.915637000  |
| C                       | -3.106870000 | 0.172174000  | 0.716762000  |
| C                       | -4.116965000 | 0.315941000  | -0.236842000 |
| C                       | -5.209909000 | 1.137155000  | 0.044180000  |
| C                       | -5.274848000 | 1.795613000  | 1.271202000  |
| H                       | -4.317309000 | 2.206986000  | 3.171231000  |
| H                       | -6.005543000 | 1.270906000  | -0.676177000 |
| H                       | -6.131468000 | 2.427983000  | 1.477703000  |
| O                       | -3.948100000 | -0.365769000 | -1.388322000 |
| C                       | -4.951131000 | -0.269271000 | -2.391886000 |
| H                       | -5.910168000 | -0.646544000 | -2.024671000 |
| H                       | -5.062018000 | 0.761323000  | -2.741091000 |
| H                       | -4.604654000 | -0.895127000 | -3.212538000 |
| O                       | -2.150689000 | 0.722687000  | 2.784842000  |
| P                       | -1.571444000 | -0.785827000 | 0.644462000  |
| C                       | -0.976223000 | 0.231425000  | 2.113331000  |
| C                       | -2.049947000 | -2.472413000 | 1.313010000  |
| C                       | -2.678904000 | -2.398181000 | 2.706090000  |
| H                       | -3.580123000 | -1.778860000 | 2.714290000  |
| H                       | -2.969094000 | -3.408577000 | 3.015082000  |
| H                       | -1.980380000 | -2.011860000 | 3.452783000  |
| C                       | -3.059453000 | -3.067794000 | 0.321575000  |
| H                       | -2.661170000 | -3.083429000 | -0.696303000 |
| H                       | -3.277703000 | -4.099456000 | 0.618699000  |
| H                       | -4.002101000 | -2.514062000 | 0.321704000  |
| C                       | -0.789163000 | -3.341140000 | 1.348919000  |
| H                       | -0.318414000 | -3.402260000 | 0.364021000  |

|   |              |              |              |
|---|--------------|--------------|--------------|
| H | -0.052911000 | -2.956413000 | 2.057762000  |
| H | -1.062688000 | -4.355228000 | 1.660158000  |
| C | 3.443274000  | 1.582953000  | 2.523615000  |
| C | 4.601778000  | 1.584735000  | 1.763874000  |
| C | 4.577175000  | 1.576718000  | 0.369386000  |
| C | 3.349831000  | 1.574989000  | -0.289943000 |
| C | 2.167561000  | 1.592453000  | 0.456916000  |
| C | 2.231154000  | 1.571011000  | 1.843334000  |
| H | 3.465654000  | 1.562896000  | 3.605931000  |
| O | 3.203431000  | 1.552306000  | -1.629553000 |
| C | 4.368964000  | 1.514220000  | -2.444116000 |
| H | 4.007128000  | 1.485728000  | -3.470510000 |
| H | 4.979679000  | 2.409543000  | -2.295769000 |
| H | 4.959959000  | 0.617277000  | -2.241588000 |
| C | 0.335431000  | 3.247102000  | -2.208776000 |
| H | -0.130424000 | 2.485850000  | -2.837904000 |
| H | 0.027865000  | 4.231118000  | -2.578143000 |
| H | 1.419270000  | 3.164842000  | -2.316700000 |
| C | -1.634081000 | 3.171470000  | -0.664268000 |
| H | -2.002966000 | 3.117153000  | 0.363908000  |
| H | -1.969994000 | 4.123920000  | -1.086630000 |
| H | -2.099720000 | 2.365985000  | -1.237074000 |
| C | 0.520725000  | 4.239542000  | 0.083296000  |
| H | 0.278636000  | 4.165287000  | 1.147354000  |
| H | 1.608769000  | 4.258131000  | -0.019647000 |
| H | 0.131354000  | 5.197452000  | -0.276399000 |
| C | -0.102554000 | 3.111547000  | -0.745778000 |
| P | 0.462870000  | 1.448666000  | -0.098632000 |
| O | 1.065166000  | 1.502073000  | 2.533187000  |
| C | -0.104364000 | 1.429270000  | 1.704661000  |
| H | 5.562702000  | 1.579899000  | 2.266507000  |
| H | 5.507209000  | 1.563502000  | -0.182202000 |

|    |              |              |              |
|----|--------------|--------------|--------------|
| Ir | -0.124130000 | -0.395218000 | -1.204228000 |
| H  | -1.271607000 | 0.422026000  | -1.864430000 |
| H  | 0.788217000  | 0.076980000  | -2.460054000 |
| Cl | -0.803860000 | -2.374488000 | -2.623225000 |
| H  | -0.686278000 | 2.329691000  | 1.905775000  |
| H  | -0.427498000 | -0.387802000 | 2.820467000  |
| O  | 1.751208000  | -1.655019000 | -0.561671000 |
| C  | 2.281894000  | -1.686753000 | 0.573489000  |
| C  | 3.728889000  | -2.249106000 | 0.535733000  |
| O  | 1.836592000  | -1.376103000 | 1.675733000  |
| F  | 3.709544000  | -3.589986000 | 0.400211000  |
| F  | 4.417819000  | -1.974742000 | 1.649932000  |
| F  | 4.435175000  | -1.762017000 | -0.497573000 |

---

## J2

| Coordinates (Angstroms) |              |              |              |
|-------------------------|--------------|--------------|--------------|
|                         | X            | Y            | Z            |
| C                       | -4.314957000 | 1.604185000  | 2.173395000  |
| C                       | -3.198158000 | 0.840839000  | 1.871395000  |
| C                       | -3.071736000 | 0.156624000  | 0.666813000  |
| C                       | -4.085213000 | 0.247503000  | -0.292404000 |
| C                       | -5.209262000 | 1.026387000  | -0.017663000 |
| C                       | -5.308540000 | 1.682267000  | 1.207639000  |
| H                       | -4.388436000 | 2.123593000  | 3.120283000  |
| H                       | -6.005629000 | 1.126072000  | -0.742426000 |
| H                       | -6.191699000 | 2.279141000  | 1.406958000  |
| O                       | -3.888011000 | -0.432970000 | -1.435363000 |
| C                       | -4.889684000 | -0.378810000 | -2.445982000 |
| H                       | -5.836727000 | -0.783593000 | -2.078386000 |
| H                       | -5.030172000 | 0.644760000  | -2.804133000 |
| H                       | -4.517890000 | -1.001249000 | -3.257753000 |
| O                       | -2.168942000 | 0.726537000  | 2.761683000  |

|   |              |              |              |
|---|--------------|--------------|--------------|
| P | -1.510970000 | -0.741151000 | 0.645933000  |
| C | -0.963399000 | 0.301990000  | 2.118808000  |
| C | -1.896459000 | -2.465661000 | 1.266353000  |
| C | -2.497127000 | -2.382552000 | 2.676555000  |
| H | -3.416117000 | -1.791762000 | 2.702215000  |
| H | -2.752533000 | -3.400385000 | 2.987670000  |
| H | -1.792929000 | -1.981463000 | 3.408584000  |
| C | -2.931156000 | -3.089805000 | 0.320863000  |
| H | -2.582700000 | -3.110079000 | -0.712672000 |
| H | -3.105508000 | -4.121748000 | 0.642096000  |
| H | -3.886822000 | -2.561761000 | 0.366204000  |
| C | -0.615774000 | -3.303344000 | 1.299855000  |
| H | -0.172224000 | -3.406562000 | 0.307898000  |
| H | 0.129141000  | -2.874467000 | 1.972464000  |
| H | -0.869750000 | -4.303271000 | 1.665967000  |
| C | 3.405411000  | 1.817630000  | 2.409692000  |
| C | 4.538156000  | 1.791472000  | 1.611048000  |
| C | 4.474094000  | 1.685695000  | 0.220819000  |
| C | 3.228402000  | 1.620655000  | -0.396617000 |
| C | 2.074535000  | 1.688450000  | 0.388612000  |
| C | 2.173991000  | 1.744216000  | 1.771770000  |
| H | 3.465466000  | 1.864611000  | 3.489463000  |
| O | 3.026085000  | 1.471996000  | -1.720946000 |
| C | 4.159201000  | 1.370260000  | -2.577883000 |
| H | 3.755776000  | 1.240869000  | -3.580600000 |
| H | 4.760407000  | 2.282867000  | -2.539636000 |
| H | 4.770944000  | 0.503756000  | -2.315197000 |
| C | 0.203146000  | 3.062490000  | -2.354797000 |
| H | -0.144896000 | 2.178114000  | -2.896681000 |
| H | -0.212448000 | 3.946374000  | -2.848873000 |
| H | 1.291420000  | 3.109547000  | -2.428683000 |
| C | -1.803154000 | 3.036942000  | -0.853253000 |

|    |              |              |              |
|----|--------------|--------------|--------------|
| H  | -2.196066000 | 3.004780000  | 0.166735000  |
| H  | -2.167145000 | 3.956836000  | -1.321143000 |
| H  | -2.215200000 | 2.191518000  | -1.408381000 |
| C  | 0.280343000  | 4.268396000  | -0.149139000 |
| H  | -0.024516000 | 4.286450000  | 0.901143000  |
| H  | 1.371649000  | 4.309682000  | -0.193151000 |
| H  | -0.111741000 | 5.174423000  | -0.621610000 |
| C  | -0.269384000 | 3.049651000  | -0.895516000 |
| P  | 0.366154000  | 1.490629000  | -0.099624000 |
| O  | 1.023360000  | 1.684619000  | 2.491950000  |
| C  | -0.156397000 | 1.535767000  | 1.695654000  |
| H  | 5.513789000  | 1.835002000  | 2.082110000  |
| H  | 5.387915000  | 1.641470000  | -0.355596000 |
| Ir | -0.135609000 | -0.485704000 | -1.079933000 |
| H  | -1.370410000 | 0.182979000  | -1.740057000 |
| Cl | -0.599015000 | -2.557492000 | -2.353624000 |
| H  | -0.778285000 | 2.414309000  | 1.873585000  |
| H  | -0.388382000 | -0.289547000 | 2.828642000  |
| O  | 1.864737000  | -1.438608000 | -0.560928000 |
| C  | 2.391477000  | -1.510561000 | 0.579157000  |
| C  | 3.838097000  | -2.067527000 | 0.537023000  |
| O  | 1.927800000  | -1.254588000 | 1.684775000  |
| F  | 3.809711000  | -3.414131000 | 0.503721000  |
| F  | 4.549827000  | -1.712023000 | 1.611994000  |
| F  | 4.517142000  | -1.661817000 | -0.545471000 |

---

### J3

---

| Coordinates (Angstroms) |              |             |             |
|-------------------------|--------------|-------------|-------------|
|                         | X            | Y           | Z           |
| C                       | -4.333770000 | 1.335523000 | 2.324305000 |
| C                       | -3.217546000 | 0.604332000 | 1.947394000 |
| C                       | -3.094012000 | 0.048595000 | 0.679697000 |

|   |              |              |              |
|---|--------------|--------------|--------------|
| C | -4.097701000 | 0.247997000  | -0.271240000 |
| C | -5.222984000 | 0.992757000  | 0.080306000  |
| C | -5.324064000 | 1.515074000  | 1.368651000  |
| H | -4.408488000 | 1.758862000  | 3.317764000  |
| H | -6.016797000 | 1.171924000  | -0.631901000 |
| H | -6.206295000 | 2.090489000  | 1.626848000  |
| O | -3.884280000 | -0.300527000 | -1.480997000 |
| C | -4.871092000 | -0.128488000 | -2.493239000 |
| H | -5.820171000 | -0.581317000 | -2.193306000 |
| H | -5.015374000 | 0.930877000  | -2.722803000 |
| H | -4.481772000 | -0.641989000 | -3.370293000 |
| O | -2.185947000 | 0.398980000  | 2.815322000  |
| P | -1.541092000 | -0.844643000 | 0.553454000  |
| C | -0.988001000 | 0.000952000  | 2.139546000  |
| C | -1.931944000 | -2.624831000 | 0.980830000  |
| C | -2.602457000 | -2.700929000 | 2.358171000  |
| H | -3.530468000 | -2.124996000 | 2.399132000  |
| H | -2.855556000 | -3.748492000 | 2.549791000  |
| H | -1.941101000 | -2.369886000 | 3.162157000  |
| C | -2.901100000 | -3.159241000 | -0.082541000 |
| H | -2.493519000 | -3.060647000 | -1.090075000 |
| H | -3.073855000 | -4.222156000 | 0.114978000  |
| H | -3.867362000 | -2.650725000 | -0.037520000 |
| C | -0.638760000 | -3.444500000 | 0.990687000  |
| H | -0.154724000 | -3.447845000 | 0.013228000  |
| H | 0.074131000  | -3.069757000 | 1.729225000  |
| H | -0.889331000 | -4.476896000 | 1.255304000  |
| C | 3.491018000  | 1.207936000  | 2.527664000  |
| C | 4.600196000  | 1.373381000  | 1.712936000  |
| C | 4.492114000  | 1.654244000  | 0.351202000  |
| C | 3.228785000  | 1.787615000  | -0.217788000 |
| C | 2.095983000  | 1.650912000  | 0.592042000  |



|    |              |              |              |
|----|--------------|--------------|--------------|
| C  | 2.240984000  | 1.332822000  | 1.935834000  |
| H  | 3.581133000  | 0.960693000  | 3.577549000  |
| O  | 2.992992000  | 2.026518000  | -1.521126000 |
| C  | 4.086353000  | 1.985712000  | -2.432318000 |
| H  | 3.647562000  | 2.115744000  | -3.420116000 |
| H  | 4.791816000  | 2.797683000  | -2.235672000 |
| H  | 4.597387000  | 1.021009000  | -2.380225000 |
| C  | 0.061168000  | 3.478325000  | -1.829395000 |
| H  | -0.352514000 | 2.717594000  | -2.496117000 |
| H  | -0.359383000 | 4.446525000  | -2.118409000 |
| H  | 1.142307000  | 3.516986000  | -1.972346000 |
| C  | -1.838509000 | 3.160702000  | -0.230987000 |
| H  | -2.161524000 | 3.005394000  | 0.801592000  |
| H  | -2.244021000 | 4.120565000  | -0.565125000 |
| H  | -2.271293000 | 2.376358000  | -0.856066000 |
| C  | 0.282521000  | 4.291402000  | 0.538640000  |
| H  | 0.067747000  | 4.116362000  | 1.596545000  |
| H  | 1.365526000  | 4.369171000  | 0.413874000  |
| H  | -0.160071000 | 5.254632000  | 0.266784000  |
| C  | -0.311488000 | 3.208493000  | -0.366717000 |
| P  | 0.370933000  | 1.548417000  | 0.121236000  |
| O  | 1.114200000  | 1.093516000  | 2.655267000  |
| C  | -0.100890000 | 1.232691000  | 1.911520000  |
| H  | 5.589338000  | 1.264714000  | 2.143594000  |
| H  | 5.387175000  | 1.751909000  | -0.247614000 |
| Ir | -0.080763000 | -0.272782000 | -1.156711000 |
| H  | -1.257955000 | 0.453650000  | -1.872841000 |
| H  | 0.642340000  | 0.454798000  | -2.587579000 |
| Cl | -0.467219000 | -2.248599000 | -2.608610000 |
| H  | -0.631410000 | 2.101925000  | 2.304400000  |
| H  | -0.455264000 | -0.697351000 | 2.783736000  |
| O  | 1.468519000  | -1.379484000 | 0.107070000  |

|   |             |              |              |
|---|-------------|--------------|--------------|
| C | 2.644965000 | -1.540079000 | -0.307940000 |
| C | 3.540067000 | -2.302913000 | 0.700198000  |
| O | 3.153644000 | -1.229358000 | -1.380394000 |
| F | 3.183893000 | -2.100906000 | 1.975393000  |
| F | 4.829060000 | -1.964583000 | 0.584562000  |
| F | 3.449572000 | -3.627085000 | 0.469637000  |
| H | 1.300855000 | 0.073060000  | -2.237888000 |

---

**TS<sub>J1-J2</sub>**

| Coordinates (Angstroms) |              |              |              |
|-------------------------|--------------|--------------|--------------|
|                         | X            | Y            | Z            |
| C                       | -4.161443000 | 2.574163000  | 1.983410000  |
| C                       | -3.145320000 | 1.633935000  | 1.886670000  |
| C                       | -3.071245000 | 0.724751000  | 0.838682000  |
| C                       | -4.043477000 | 0.753760000  | -0.164420000 |
| C                       | -5.073878000 | 1.690933000  | -0.092106000 |
| C                       | -5.115962000 | 2.583718000  | 0.976773000  |
| H                       | -4.189739000 | 3.272142000  | 2.810699000  |
| H                       | -5.836097000 | 1.735444000  | -0.858173000 |
| H                       | -5.919132000 | 3.311385000  | 1.016601000  |
| O                       | -3.910370000 | -0.148088000 | -1.158005000 |
| C                       | -5.045192000 | -0.430294000 | -1.969503000 |
| H                       | -5.883347000 | -0.763154000 | -1.349536000 |
| H                       | -5.344726000 | 0.437151000  | -2.560477000 |
| H                       | -4.739460000 | -1.234760000 | -2.636063000 |
| O                       | -2.178603000 | 1.558166000  | 2.843033000  |
| P                       | -1.645590000 | -0.369791000 | 1.064430000  |
| C                       | -1.049284000 | 0.788020000  | 2.410916000  |
| C                       | -2.376837000 | -1.871197000 | 1.942783000  |
| C                       | -2.988338000 | -1.461746000 | 3.289429000  |
| H                       | -3.771717000 | -0.707948000 | 3.175782000  |
| H                       | -3.451178000 | -2.349796000 | 3.732463000  |

|   |              |              |              |
|---|--------------|--------------|--------------|
| H | -2.242507000 | -1.095416000 | 3.998318000  |
| C | -3.494549000 | -2.454297000 | 1.066662000  |
| H | -3.140808000 | -2.716059000 | 0.069603000  |
| H | -3.868122000 | -3.363073000 | 1.550506000  |
| H | -4.332819000 | -1.758971000 | 0.975494000  |
| C | -1.275676000 | -2.909038000 | 2.173373000  |
| H | -0.814952000 | -3.222479000 | 1.234586000  |
| H | -0.494697000 | -2.524940000 | 2.831537000  |
| H | -1.720271000 | -3.789807000 | 2.648970000  |
| C | 3.549988000  | 1.589643000  | 2.912940000  |
| C | 4.742295000  | 1.660996000  | 2.214618000  |
| C | 4.775772000  | 1.772706000  | 0.825632000  |
| C | 3.582086000  | 1.768970000  | 0.107667000  |
| C | 2.362776000  | 1.641125000  | 0.785381000  |
| C | 2.372024000  | 1.603909000  | 2.175223000  |
| H | 3.514817000  | 1.530053000  | 3.993273000  |
| O | 3.509180000  | 1.916101000  | -1.227430000 |
| C | 4.672865000  | 2.327099000  | -1.931077000 |
| H | 4.364744000  | 2.452943000  | -2.968063000 |
| H | 5.042356000  | 3.279922000  | -1.539986000 |
| H | 5.463811000  | 1.574742000  | -1.877582000 |
| C | 0.813458000  | 3.147259000  | -2.068742000 |
| H | 0.674248000  | 2.179096000  | -2.545207000 |
| H | 0.305664000  | 3.905606000  | -2.672555000 |
| H | 1.880538000  | 3.365817000  | -2.059022000 |
| C | -1.297083000 | 3.262987000  | -0.710405000 |
| H | -1.744804000 | 3.317447000  | 0.285356000  |
| H | -1.559088000 | 4.183331000  | -1.241770000 |
| H | -1.747331000 | 2.422297000  | -1.241175000 |
| C | 0.812874000  | 4.335942000  | 0.128335000  |
| H | 0.373684000  | 4.445256000  | 1.122942000  |
| H | 1.897798000  | 4.258024000  | 0.234743000  |

|    |              |              |              |
|----|--------------|--------------|--------------|
| H  | 0.594514000  | 5.254427000  | -0.426459000 |
| C  | 0.231815000  | 3.152714000  | -0.651071000 |
| P  | 0.664069000  | 1.521664000  | 0.167694000  |
| O  | 1.182044000  | 1.584898000  | 2.817071000  |
| C  | 0.056116000  | 1.732825000  | 1.947624000  |
| H  | 5.679208000  | 1.649168000  | 2.760448000  |
| H  | 5.726742000  | 1.863155000  | 0.319280000  |
| Ir | -0.116238000 | -0.464623000 | -0.692106000 |
| H  | -1.206994000 | 0.301603000  | -1.485282000 |
| H  | 0.758300000  | -0.530703000 | -2.225295000 |
| Cl | -1.042408000 | -2.637931000 | -1.444774000 |
| H  | -0.318262000 | 2.750965000  | 2.067803000  |
| H  | -0.684412000 | 0.224860000  | 3.267606000  |
| O  | 1.716602000  | -1.589478000 | 0.188180000  |
| C  | 2.105398000  | -1.629276000 | 1.379083000  |
| C  | 3.537338000  | -2.215473000 | 1.504721000  |
| O  | 1.536863000  | -1.309347000 | 2.418891000  |
| F  | 3.524344000  | -3.542086000 | 1.268497000  |
| F  | 4.064916000  | -2.032434000 | 2.719486000  |
| F  | 4.385815000  | -1.669611000 | 0.617035000  |
| C  | -1.212011000 | 1.673505000  | -4.377562000 |
| C  | 0.065699000  | 1.039612000  | -4.910557000 |
| C  | -1.002395000 | -1.108992000 | -4.895611000 |
| C  | -2.283078000 | -0.466480000 | -4.388176000 |
| C  | -3.620058000 | 1.534176000  | -4.581860000 |
| C  | -3.798899000 | 2.599400000  | -3.694470000 |
| C  | -5.051464000 | 3.172093000  | -3.493170000 |
| C  | -6.164548000 | 2.685601000  | -4.163117000 |
| C  | -6.015845000 | 1.626816000  | -5.055491000 |
| C  | -4.764096000 | 1.085829000  | -5.252457000 |
| H  | -1.265957000 | 2.700977000  | -4.743876000 |
| H  | 0.926283000  | 1.617169000  | -4.589074000 |

|   |              |              |              |
|---|--------------|--------------|--------------|
| H | -1.017618000 | -1.135554000 | -5.991202000 |
| H | -2.305174000 | -0.514194000 | -3.291110000 |
| H | -2.948910000 | 2.989516000  | -3.150361000 |
| H | -5.150693000 | 3.994990000  | -2.794222000 |
| H | -7.142589000 | 3.124565000  | -4.005067000 |
| H | -6.856118000 | 1.225352000  | -5.610005000 |
| N | -2.374969000 | 0.928152000  | -4.843250000 |
| N | 0.179784000  | -0.350751000 | -4.485537000 |
| H | -3.126212000 | -1.037980000 | -4.774152000 |
| H | -0.959936000 | -2.129242000 | -4.533257000 |
| H | 0.045842000  | 1.055299000  | -6.006028000 |
| H | -1.174404000 | 1.697702000  | -3.281744000 |
| C | 1.149231000  | -0.829183000 | -3.676453000 |
| C | 1.307049000  | -2.342288000 | -3.691821000 |
| C | 2.472786000  | -0.075724000 | -3.643109000 |
| C | 2.393549000  | -2.912797000 | -2.791741000 |
| H | 0.368824000  | -2.829363000 | -3.447604000 |
| C | 3.520975000  | -0.704172000 | -2.726288000 |
| H | 2.838753000  | -0.086006000 | -4.678806000 |
| C | 3.718731000  | -2.191642000 | -2.979659000 |
| H | 2.080691000  | -2.829314000 | -1.749266000 |
| H | 3.223413000  | -0.555291000 | -1.686091000 |
| H | 4.470445000  | -2.589154000 | -2.291302000 |
| H | 2.328634000  | 0.965040000  | -3.359661000 |
| H | 1.540769000  | -2.573966000 | -4.740068000 |
| H | 2.490923000  | -3.979502000 | -3.015922000 |
| H | 4.094322000  | -2.352792000 | -3.998656000 |
| H | 4.460951000  | -0.168698000 | -2.871980000 |
| F | -4.637302000 | 0.075054000  | -6.143198000 |

---

TSJ3-11

---

Coordinates (Angstroms)

---

|   | X            | Y            | Z            |
|---|--------------|--------------|--------------|
| C | 4.942392000  | -1.922931000 | -0.361307000 |
| C | 3.714010000  | -1.499942000 | 0.125974000  |
| C | 3.416441000  | -0.155709000 | 0.320368000  |
| C | 4.385171000  | 0.812414000  | 0.040262000  |
| C | 5.628192000  | 0.410697000  | -0.449426000 |
| C | 5.883300000  | -0.944732000 | -0.647620000 |
| H | 5.144537000  | -2.977064000 | -0.502908000 |
| H | 6.398578000  | 1.137153000  | -0.669451000 |
| H | 6.854470000  | -1.241181000 | -1.028341000 |
| O | 4.040874000  | 2.087422000  | 0.292893000  |
| C | 4.944438000  | 3.126297000  | -0.063904000 |
| H | 5.875616000  | 3.051602000  | 0.504958000  |
| H | 5.156815000  | 3.107279000  | -1.136647000 |
| H | 4.437928000  | 4.056128000  | 0.189323000  |
| O | 2.734681000  | -2.403428000 | 0.407169000  |
| P | 1.680254000  | 0.001716000  | 0.784637000  |
| C | 1.674768000  | -1.835845000 | 1.187030000  |
| C | 1.468771000  | 0.904174000  | 2.405411000  |
| C | 2.672222000  | 0.658530000  | 3.318034000  |
| H | 3.585030000  | 1.091074000  | 2.901049000  |
| H | 2.482736000  | 1.137232000  | 4.284429000  |
| H | 2.845763000  | -0.404991000 | 3.502550000  |
| C | 1.310499000  | 2.404579000  | 2.129613000  |
| H | 0.433538000  | 2.610127000  | 1.513590000  |
| H | 1.179533000  | 2.915876000  | 3.089190000  |
| H | 2.189955000  | 2.821905000  | 1.637459000  |
| C | 0.181806000  | 0.366152000  | 3.047414000  |
| H | -0.673238000 | 0.444680000  | 2.370927000  |
| H | 0.286995000  | -0.674816000 | 3.361207000  |
| H | -0.040839000 | 0.962065000  | 3.938090000  |
| C | -2.537184000 | -2.377159000 | 2.984886000  |

|    |              |              |              |
|----|--------------|--------------|--------------|
| C  | -3.810103000 | -1.854437000 | 2.815731000  |
| C  | -4.223107000 | -1.264053000 | 1.620896000  |
| C  | -3.331828000 | -1.194083000 | 0.553307000  |
| C  | -2.049045000 | -1.732791000 | 0.696350000  |
| C  | -1.667128000 | -2.298561000 | 1.904687000  |
| H  | -2.217927000 | -2.825319000 | 3.917208000  |
| O  | -3.603150000 | -0.634979000 | -0.640628000 |
| C  | -4.917407000 | -0.147181000 | -0.887858000 |
| H  | -4.891804000 | 0.269655000  | -1.892721000 |
| H  | -5.646547000 | -0.961253000 | -0.843795000 |
| H  | -5.190854000 | 0.634029000  | -0.175418000 |
| C  | -1.900974000 | -2.383993000 | -2.851273000 |
| H  | -1.509182000 | -1.475192000 | -3.312804000 |
| H  | -2.035939000 | -3.131203000 | -3.639969000 |
| H  | -2.878806000 | -2.162275000 | -2.419321000 |
| C  | 0.425490000  | -3.233487000 | -2.461548000 |
| H  | 1.162482000  | -3.614844000 | -1.749268000 |
| H  | 0.290069000  | -3.992403000 | -3.238408000 |
| H  | 0.835555000  | -2.337263000 | -2.932771000 |
| C  | -1.522361000 | -4.236917000 | -1.210413000 |
| H  | -0.866648000 | -4.697030000 | -0.466491000 |
| H  | -2.495723000 | -4.055587000 | -0.747152000 |
| H  | -1.662599000 | -4.963687000 | -2.016545000 |
| C  | -0.933590000 | -2.953386000 | -1.807597000 |
| P  | -0.665693000 | -1.702211000 | -0.447298000 |
| O  | -0.395000000 | -2.761752000 | 2.012907000  |
| C  | 0.398002000  | -2.581006000 | 0.835850000  |
| H  | -4.512451000 | -1.899418000 | 3.640812000  |
| H  | -5.224464000 | -0.863973000 | 1.538051000  |
| Ir | 0.153308000  | 0.349648000  | -0.955251000 |
| H  | 1.174366000  | -0.377492000 | -1.866269000 |
| H  | -0.803304000 | 0.389531000  | -2.366718000 |

|    |              |              |              |
|----|--------------|--------------|--------------|
| Cl | 1.117703000  | 2.514676000  | -1.713010000 |
| H  | 0.683937000  | -3.570422000 | 0.477145000  |
| H  | 1.897639000  | -1.995962000 | 2.245631000  |
| O  | -1.461000000 | 1.693989000  | 0.289665000  |
| C  | -2.306548000 | 2.142434000  | -0.492074000 |
| C  | -3.357593000 | 3.082873000  | 0.130575000  |
| O  | -2.394983000 | 1.939225000  | -1.728148000 |
| F  | -4.354449000 | 3.365990000  | -0.705807000 |
| F  | -2.778230000 | 4.236696000  | 0.489316000  |
| F  | -3.885803000 | 2.535383000  | 1.232513000  |
| H  | -1.426118000 | 1.069986000  | -2.006452000 |

---

### I2c

---

| Coordinates (Angstroms) |              |              |              |
|-------------------------|--------------|--------------|--------------|
|                         | X            | Y            | Z            |
| C                       | -3.353506000 | 3.227336000  | -0.447320000 |
| C                       | -2.516617000 | 2.312154000  | 0.176333000  |
| C                       | -2.619957000 | 0.944490000  | -0.047343000 |
| C                       | -3.575640000 | 0.458778000  | -0.943252000 |
| C                       | -4.422406000 | 1.359519000  | -1.590050000 |
| C                       | -4.300608000 | 2.723286000  | -1.327737000 |
| H                       | -3.251261000 | 4.288198000  | -0.256583000 |
| H                       | -5.169717000 | 1.015673000  | -2.292164000 |
| H                       | -4.965025000 | 3.411513000  | -1.838638000 |
| O                       | -3.604269000 | -0.877798000 | -1.111867000 |
| C                       | -4.546955000 | -1.431383000 | -2.022727000 |
| H                       | -5.571583000 | -1.216039000 | -1.706112000 |
| H                       | -4.380912000 | -1.055000000 | -3.036028000 |
| H                       | -4.377211000 | -2.506407000 | -2.001159000 |
| O                       | -1.556684000 | 2.723928000  | 1.052323000  |
| P                       | -1.386811000 | 0.054309000  | 0.923859000  |
| C                       | -0.566649000 | 1.707903000  | 1.278197000  |



|   |              |              |              |
|---|--------------|--------------|--------------|
| C | -2.232489000 | -0.417998000 | 2.524249000  |
| C | -2.919954000 | 0.778960000  | 3.187931000  |
| H | -3.664774000 | 1.235589000  | 2.530603000  |
| H | -3.441182000 | 0.426872000  | 4.084318000  |
| H | -2.208726000 | 1.547073000  | 3.500963000  |
| C | -3.277831000 | -1.489872000 | 2.191794000  |
| H | -2.833660000 | -2.337069000 | 1.663759000  |
| H | -3.716871000 | -1.857102000 | 3.125702000  |
| H | -4.086364000 | -1.082245000 | 1.578975000  |
| C | -1.159868000 | -0.992480000 | 3.455237000  |
| H | -0.721289000 | -1.906842000 | 3.047346000  |
| H | -0.354416000 | -0.274415000 | 3.641591000  |
| H | -1.617765000 | -1.237849000 | 4.418792000  |
| C | 3.941523000  | 2.092119000  | 1.992338000  |
| C | 5.062997000  | 1.281904000  | 1.910030000  |
| C | 5.126621000  | 0.181215000  | 1.055110000  |
| C | 4.033659000  | -0.117508000 | 0.244331000  |
| C | 2.897806000  | 0.698317000  | 0.298433000  |
| C | 2.861335000  | 1.772318000  | 1.178014000  |
| H | 3.891398000  | 2.938081000  | 2.666195000  |
| O | 3.976379000  | -1.154824000 | -0.613378000 |
| C | 5.095565000  | -2.030020000 | -0.704316000 |
| H | 4.819230000  | -2.780954000 | -1.442165000 |
| H | 5.986481000  | -1.493881000 | -1.043127000 |
| H | 5.291124000  | -2.515383000 | 0.255950000  |
| C | 2.172536000  | 0.115049000  | -3.182895000 |
| H | 1.538532000  | -0.771939000 | -3.242214000 |
| H | 2.302614000  | 0.511797000  | -4.194894000 |
| H | 3.152754000  | -0.185514000 | -2.805427000 |
| C | 0.148184000  | 1.558729000  | -2.856249000 |
| H | -0.346842000 | 2.339134000  | -2.270764000 |
| H | 0.263004000  | 1.936053000  | -3.877213000 |

|    |              |              |              |
|----|--------------|--------------|--------------|
| H  | -0.508694000 | 0.686677000  | -2.890435000 |
| C  | 2.440073000  | 2.441848000  | -2.292143000 |
| H  | 2.045704000  | 3.243962000  | -1.662021000 |
| H  | 3.448860000  | 2.199234000  | -1.948310000 |
| H  | 2.517712000  | 2.833897000  | -3.310954000 |
| C  | 1.537528000  | 1.202748000  | -2.309669000 |
| P  | 1.333347000  | 0.545203000  | -0.572506000 |
| O  | 1.724991000  | 2.513666000  | 1.225539000  |
| C  | 0.659639000  | 2.006433000  | 0.409221000  |
| H  | 5.921549000  | 1.505240000  | 2.533868000  |
| H  | 6.021496000  | -0.425526000 | 1.030404000  |
| Ir | 0.162780000  | -1.340993000 | -0.238982000 |
| H  | -0.661278000 | -1.029109000 | -1.550233000 |
| H  | 1.140059000  | -2.109122000 | -1.265297000 |
| Cl | -1.049026000 | -3.523035000 | -0.008032000 |
| H  | 0.381025000  | 2.804476000  | -0.279208000 |
| H  | -0.272104000 | 1.761956000  | 2.326410000  |
| H  | 1.412712000  | -2.024000000 | 0.878065000  |
| H  | 0.883510000  | -1.664494000 | 1.411830000  |

---

### I3c

---

| Coordinates (Angstroms) |              |              |              |
|-------------------------|--------------|--------------|--------------|
|                         | X            | Y            | Z            |
| C                       | -4.765766000 | 1.580464000  | 1.928526000  |
| C                       | -3.608099000 | 0.833378000  | 1.750660000  |
| C                       | -3.459719000 | -0.058446000 | 0.697773000  |
| C                       | -4.482769000 | -0.189765000 | -0.246070000 |
| C                       | -5.652065000 | 0.555036000  | -0.095067000 |
| C                       | -5.775032000 | 1.421316000  | 0.990675000  |
| H                       | -4.855095000 | 2.269634000  | 2.758883000  |
| H                       | -6.460693000 | 0.473631000  | -0.808790000 |
| H                       | -6.689524000 | 1.994621000  | 1.096666000  |

|   |              |              |              |
|---|--------------|--------------|--------------|
| O | -4.248070000 | -1.048661000 | -1.257144000 |
| C | -5.241658000 | -1.209559000 | -2.262305000 |
| H | -6.168244000 | -1.605995000 | -1.837174000 |
| H | -5.437653000 | -0.263271000 | -2.774522000 |
| H | -4.829943000 | -1.927357000 | -2.969700000 |
| O | -2.563777000 | 0.958962000  | 2.613397000  |
| P | -1.825450000 | -0.819900000 | 0.730614000  |
| C | -1.355198000 | 0.351863000  | 2.132025000  |
| C | -2.015943000 | -2.486533000 | 1.557962000  |
| C | -2.778999000 | -2.376128000 | 2.881157000  |
| H | -3.772940000 | -1.942621000 | 2.738732000  |
| H | -2.910860000 | -3.380623000 | 3.296744000  |
| H | -2.243112000 | -1.782069000 | 3.625576000  |
| C | -2.787237000 | -3.401292000 | 0.599193000  |
| H | -2.303068000 | -3.463573000 | -0.378238000 |
| H | -2.829136000 | -4.407648000 | 1.029582000  |
| H | -3.814099000 | -3.054438000 | 0.456763000  |
| C | -0.604302000 | -3.035575000 | 1.794932000  |
| H | -0.075370000 | -3.203399000 | 0.853240000  |
| H | 0.001382000  | -2.363257000 | 2.411185000  |
| H | -0.677183000 | -3.995108000 | 2.316958000  |
| C | 3.215527000  | 1.458397000  | 2.468451000  |
| C | 4.346596000  | 1.614064000  | 1.683071000  |
| C | 4.276537000  | 1.758105000  | 0.298106000  |
| C | 3.031645000  | 1.750130000  | -0.327122000 |
| C | 1.876037000  | 1.629334000  | 0.449219000  |
| C | 1.985651000  | 1.460677000  | 1.823305000  |
| H | 3.274489000  | 1.321940000  | 3.540695000  |
| O | 2.841827000  | 1.850574000  | -1.656947000 |
| C | 3.983576000  | 1.821633000  | -2.507828000 |
| H | 3.591303000  | 1.835890000  | -3.523189000 |
| H | 4.615451000  | 2.699710000  | -2.347032000 |

|    |              |              |              |
|----|--------------|--------------|--------------|
| H  | 4.557860000  | 0.905770000  | -2.348306000 |
| C  | -0.172750000 | 3.233174000  | -2.199527000 |
| H  | -0.699409000 | 2.461931000  | -2.764470000 |
| H  | -0.514653000 | 4.210720000  | -2.554965000 |
| H  | 0.895636000  | 3.145649000  | -2.407950000 |
| C  | -1.982882000 | 3.173544000  | -0.464984000 |
| H  | -2.238873000 | 3.168700000  | 0.598111000  |
| H  | -2.377156000 | 4.099346000  | -0.895427000 |
| H  | -2.491094000 | 2.334536000  | -0.947585000 |
| C  | 0.226466000  | 4.276382000  | 0.043737000  |
| H  | 0.079683000  | 4.227633000  | 1.126153000  |
| H  | 1.300872000  | 4.293829000  | -0.156267000 |
| H  | -0.197500000 | 5.223804000  | -0.303966000 |
| C  | -0.466059000 | 3.128923000  | -0.698928000 |
| P  | 0.159203000  | 1.487600000  | -0.061825000 |
| O  | 0.841599000  | 1.260478000  | 2.526891000  |
| C  | -0.352762000 | 1.441456000  | 1.754751000  |
| H  | 5.321682000  | 1.615405000  | 2.156642000  |
| H  | 5.187519000  | 1.858480000  | -0.274822000 |
| Ir | -0.401306000 | -0.401174000 | -1.139213000 |
| H  | -1.621422000 | 0.359681000  | -1.818065000 |
| H  | 0.406792000  | 0.112780000  | -2.437932000 |
| Cl | -0.928583000 | -2.443391000 | -2.503529000 |
| H  | -0.783665000 | 2.403850000  | 2.037164000  |
| H  | -0.922653000 | -0.215333000 | 2.956265000  |
| H  | 1.228657000  | -1.097199000 | -0.888416000 |
| H  | 0.790761000  | -1.384992000 | -0.228523000 |
| C  | 3.820780000  | -1.564836000 | 0.121954000  |
| O  | 3.560159000  | -1.422037000 | -1.083931000 |
| O  | 3.072694000  | -1.693206000 | 1.101917000  |
| C  | 5.345379000  | -1.671826000 | 0.436389000  |
| F  | 5.768059000  | -2.937068000 | 0.219847000  |

|   |             |              |              |
|---|-------------|--------------|--------------|
| F | 6.101598000 | -0.877985000 | -0.340959000 |
| F | 5.648595000 | -1.377221000 | 1.709972000  |

---

**I4c**

---

| Coordinates (Angstroms) |              |              |              |
|-------------------------|--------------|--------------|--------------|
|                         | X            | Y            | Z            |
| C                       | -4.787683000 | 1.852950000  | 1.637020000  |
| C                       | -3.656845000 | 1.050181000  | 1.556472000  |
| C                       | -3.492024000 | 0.100282000  | 0.558214000  |
| C                       | -4.474039000 | -0.040903000 | -0.425217000 |
| C                       | -5.616000000 | 0.759579000  | -0.374315000 |
| C                       | -5.755643000 | 1.687114000  | 0.657168000  |
| H                       | -4.888523000 | 2.587053000  | 2.426739000  |
| H                       | -6.392410000 | 0.673398000  | -1.122422000 |
| H                       | -6.647478000 | 2.303843000  | 0.685028000  |
| O                       | -4.232894000 | -0.967956000 | -1.375793000 |
| C                       | -5.180143000 | -1.131551000 | -2.423539000 |
| H                       | -6.145003000 | -1.466451000 | -2.031209000 |
| H                       | -5.306914000 | -0.202689000 | -2.987001000 |
| H                       | -4.767306000 | -1.898638000 | -3.076418000 |
| O                       | -2.651695000 | 1.174023000  | 2.467662000  |
| P                       | -1.893869000 | -0.733626000 | 0.719324000  |
| C                       | -1.438508000 | 0.530518000  | 2.043943000  |
| C                       | -2.273814000 | -2.297178000 | 1.683644000  |
| C                       | -3.069525000 | -2.013411000 | 2.961452000  |
| H                       | -4.016860000 | -1.509959000 | 2.749078000  |
| H                       | -3.304174000 | -2.966831000 | 3.447235000  |
| H                       | -2.507169000 | -1.411452000 | 3.679548000  |
| C                       | -3.096363000 | -3.211960000 | 0.767215000  |
| H                       | -2.592119000 | -3.381610000 | -0.187407000 |
| H                       | -3.235252000 | -4.179776000 | 1.261814000  |
| H                       | -4.086016000 | -2.791428000 | 0.569809000  |

|   |              |              |              |
|---|--------------|--------------|--------------|
| C | -0.938011000 | -2.962150000 | 2.031236000  |
| H | -0.392422000 | -3.252049000 | 1.130438000  |
| H | -0.296137000 | -2.301517000 | 2.623201000  |
| H | -1.129838000 | -3.863558000 | 2.623310000  |
| C | 3.083285000  | 1.805893000  | 2.517481000  |
| C | 4.260879000  | 1.889382000  | 1.793501000  |
| C | 4.277713000  | 1.862439000  | 0.398366000  |
| C | 3.073696000  | 1.755365000  | -0.296052000 |
| C | 1.871807000  | 1.683930000  | 0.413103000  |
| C | 1.896682000  | 1.691938000  | 1.800479000  |
| H | 3.071669000  | 1.811071000  | 3.600245000  |
| O | 2.967634000  | 1.701629000  | -1.638275000 |
| C | 4.156433000  | 1.709848000  | -2.419260000 |
| H | 3.828390000  | 1.622529000  | -3.453656000 |
| H | 4.705166000  | 2.646830000  | -2.286859000 |
| H | 4.794721000  | 0.860366000  | -2.166256000 |
| C | 0.012338000  | 2.899559000  | -2.524753000 |
| H | -0.435734000 | 2.042591000  | -3.030699000 |
| H | -0.340213000 | 3.810886000  | -3.019348000 |
| H | 1.096063000  | 2.842136000  | -2.643473000 |
| C | -1.927236000 | 3.001678000  | -0.948622000 |
| H | -2.274371000 | 3.115627000  | 0.082013000  |
| H | -2.289501000 | 3.865701000  | -1.515002000 |
| H | -2.385941000 | 2.104050000  | -1.370985000 |
| C | 0.220170000  | 4.194431000  | -0.392218000 |
| H | 0.002092000  | 4.259638000  | 0.677447000  |
| H | 1.305347000  | 4.217541000  | -0.521338000 |
| H | -0.195136000 | 5.089199000  | -0.867470000 |
| C | -0.396263000 | 2.954794000  | -1.048362000 |
| P | 0.191300000  | 1.400664000  | -0.182657000 |
| O | 0.715582000  | 1.548393000  | 2.454070000  |
| C | -0.432381000 | 1.589683000  | 1.590759000  |

|    |              |              |              |
|----|--------------|--------------|--------------|
| H  | 5.203717000  | 1.971608000  | 2.322613000  |
| H  | 5.220809000  | 1.926236000  | -0.126784000 |
| Ir | -0.284765000 | -0.611536000 | -0.995392000 |
| H  | -1.373794000 | -0.035714000 | -2.107754000 |
| H  | 0.860622000  | -0.385356000 | -2.133281000 |
| Cl | -0.627137000 | -2.942973000 | -1.988086000 |
| H  | -0.899071000 | 2.568166000  | 1.718407000  |
| H  | -1.016894000 | 0.020770000  | 2.910488000  |
| H  | 2.146091000  | -1.245850000 | -0.559801000 |
| H  | 0.814915000  | -1.282514000 | 0.082203000  |
| C  | 3.735284000  | -1.424086000 | 0.486132000  |
| O  | 3.147211000  | -1.363449000 | -0.672246000 |
| O  | 3.237194000  | -1.387818000 | 1.581318000  |
| C  | 5.258828000  | -1.637307000 | 0.340098000  |
| F  | 5.514676000  | -2.949289000 | 0.234346000  |
| F  | 5.767655000  | -1.037808000 | -0.738528000 |
| F  | 5.901600000  | -1.179047000 | 1.412256000  |

---

**I5c**

| Coordinates (Angstroms) |              |              |              |
|-------------------------|--------------|--------------|--------------|
|                         | X            | Y            | Z            |
| C                       | -3.227128000 | 3.298160000  | 0.040932000  |
| C                       | -2.460667000 | 2.247986000  | 0.531803000  |
| C                       | -2.629987000 | 0.942360000  | 0.097108000  |
| C                       | -3.566027000 | 0.666958000  | -0.903025000 |
| C                       | -4.342157000 | 1.703467000  | -1.422530000 |
| C                       | -4.164965000 | 2.998619000  | -0.935803000 |
| H                       | -3.075831000 | 4.307543000  | 0.402969000  |
| H                       | -5.078054000 | 1.518980000  | -2.193524000 |
| H                       | -4.775451000 | 3.796485000  | -1.344667000 |
| O                       | -3.643999000 | -0.620948000 | -1.297701000 |
| C                       | -4.518022000 | -0.955674000 | -2.367699000 |

|   |              |              |              |
|---|--------------|--------------|--------------|
| H | -5.561215000 | -0.758950000 | -2.103087000 |
| H | -4.253413000 | -0.407806000 | -3.276883000 |
| H | -4.380775000 | -2.022639000 | -2.534889000 |
| O | -1.491685000 | 2.477413000  | 1.459282000  |
| P | -1.429902000 | -0.166058000 | 0.876406000  |
| C | -0.625727000 | 1.350985000  | 1.669921000  |
| C | -2.357588000 | -0.962171000 | 2.302576000  |
| C | -3.122990000 | 0.071576000  | 3.133970000  |
| H | -3.850089000 | 0.619216000  | 2.528097000  |
| H | -3.674136000 | -0.448465000 | 3.925092000  |
| H | -2.461128000 | 0.794057000  | 3.618349000  |
| C | -3.349961000 | -1.975015000 | 1.718413000  |
| H | -2.852281000 | -2.694307000 | 1.063647000  |
| H | -3.823993000 | -2.522175000 | 2.541021000  |
| H | -4.139477000 | -1.477040000 | 1.149482000  |
| C | -1.326179000 | -1.684228000 | 3.175057000  |
| H | -0.823021000 | -2.481227000 | 2.623180000  |
| H | -0.561378000 | -1.000503000 | 3.557509000  |
| H | -1.833652000 | -2.132912000 | 4.035727000  |
| C | 3.985225000  | 0.859851000  | 2.642016000  |
| C | 5.152706000  | 0.296152000  | 2.151271000  |
| C | 5.256533000  | -0.171684000 | 0.841445000  |
| C | 4.154850000  | -0.074650000 | -0.007690000 |
| C | 2.973885000  | 0.506909000  | 0.459403000  |
| C | 2.903965000  | 0.949350000  | 1.772923000  |
| H | 3.901880000  | 1.217401000  | 3.660805000  |
| O | 4.132096000  | -0.509798000 | -1.284660000 |
| C | 5.311227000  | -1.089641000 | -1.829253000 |
| H | 5.063709000  | -1.350162000 | -2.856936000 |
| H | 6.137927000  | -0.373151000 | -1.823982000 |
| H | 5.593989000  | -1.993408000 | -1.282146000 |
| C | 1.790292000  | 1.079945000  | -3.033398000 |



|    |              |              |              |
|----|--------------|--------------|--------------|
| H  | 1.024306000  | 0.341813000  | -3.278750000 |
| H  | 1.850235000  | 1.799398000  | -3.857045000 |
| H  | 2.751212000  | 0.568010000  | -2.954119000 |
| C  | 0.061503000  | 2.488076000  | -1.900015000 |
| H  | -0.195898000 | 3.118445000  | -1.044645000 |
| H  | 0.067189000  | 3.126129000  | -2.789646000 |
| H  | -0.724222000 | 1.738331000  | -2.026157000 |
| C  | 2.509124000  | 2.906292000  | -1.477574000 |
| H  | 2.340419000  | 3.441955000  | -0.539261000 |
| H  | 3.511795000  | 2.471988000  | -1.446552000 |
| H  | 2.484924000  | 3.643103000  | -2.287137000 |
| C  | 1.444092000  | 1.838350000  | -1.747072000 |
| P  | 1.347312000  | 0.629560000  | -0.319235000 |
| O  | 1.716243000  | 1.447454000  | 2.207672000  |
| C  | 0.772024000  | 1.672965000  | 1.148711000  |
| H  | 6.015171000  | 0.214320000  | 2.803767000  |
| H  | 6.186534000  | -0.606018000 | 0.500604000  |
| Ir | 0.164292000  | -1.241938000 | -0.482506000 |
| H  | -0.617925000 | -0.769123000 | -1.875897000 |
| H  | 1.326228000  | -1.859539000 | -1.437981000 |
| Cl | -1.042042000 | -3.492310000 | -0.716500000 |
| H  | 0.807938000  | 2.735259000  | 0.897101000  |
| H  | -0.542628000 | 1.201932000  | 2.746576000  |
| H  | 1.018807000  | -1.853615000 | 0.829585000  |

---

**TS<sub>I3c-I4c</sub>**

---

| Coordinates (Angstroms) |              |              |              |
|-------------------------|--------------|--------------|--------------|
|                         | X            | Y            | Z            |
| C                       | -4.653421000 | 1.588123000  | 2.079269000  |
| C                       | -3.519842000 | 0.827373000  | 1.826194000  |
| C                       | -3.403979000 | 0.025265000  | 0.697668000  |
| C                       | -4.437399000 | -0.000315000 | -0.241004000 |

|   |              |              |              |
|---|--------------|--------------|--------------|
| C | -5.582409000 | 0.765899000  | -0.017808000 |
| C | -5.673509000 | 1.537977000  | 1.139571000  |
| H | -4.719208000 | 2.202880000  | 2.968243000  |
| H | -6.397795000 | 0.770415000  | -0.728484000 |
| H | -6.570272000 | 2.126010000  | 1.302014000  |
| O | -4.237803000 | -0.786205000 | -1.319062000 |
| C | -5.245734000 | -0.836106000 | -2.321483000 |
| H | -6.183851000 | -1.225612000 | -1.915421000 |
| H | -5.408646000 | 0.150831000  | -2.764045000 |
| H | -4.869095000 | -1.517585000 | -3.082187000 |
| O | -2.463440000 | 0.836838000  | 2.687714000  |
| P | -1.799606000 | -0.808755000 | 0.674097000  |
| C | -1.265483000 | 0.341897000  | 2.065232000  |
| C | -2.090896000 | -2.461634000 | 1.509770000  |
| C | -2.789443000 | -2.313600000 | 2.864419000  |
| H | -3.758720000 | -1.816644000 | 2.768666000  |
| H | -2.968545000 | -3.311866000 | 3.278044000  |
| H | -2.183504000 | -1.762131000 | 3.587300000  |
| C | -2.970505000 | -3.297820000 | 0.571522000  |
| H | -2.520027000 | -3.396826000 | -0.419174000 |
| H | -3.091363000 | -4.299901000 | 0.997455000  |
| H | -3.966073000 | -2.858958000 | 0.461203000  |
| C | -0.723402000 | -3.129248000 | 1.691551000  |
| H | -0.245269000 | -3.325695000 | 0.729364000  |
| H | -0.045354000 | -2.513166000 | 2.290976000  |
| H | -0.857451000 | -4.084604000 | 2.209848000  |
| C | 3.114888000  | 1.860182000  | 2.470238000  |
| C | 4.281914000  | 1.900978000  | 1.725626000  |
| C | 4.277837000  | 1.833737000  | 0.331926000  |
| C | 3.062670000  | 1.729235000  | -0.341482000 |
| C | 1.871064000  | 1.697856000  | 0.389073000  |
| C | 1.915823000  | 1.744431000  | 1.775238000  |

|    |              |              |              |
|----|--------------|--------------|--------------|
| H  | 3.121320000  | 1.894059000  | 3.552409000  |
| O  | 2.934540000  | 1.645489000  | -1.679475000 |
| C  | 4.111365000  | 1.558877000  | -2.474114000 |
| H  | 3.764043000  | 1.447146000  | -3.499833000 |
| H  | 4.711706000  | 2.469275000  | -2.388223000 |
| H  | 4.705727000  | 0.686280000  | -2.193201000 |
| C  | 0.010630000  | 3.082361000  | -2.418929000 |
| H  | -0.398427000 | 2.243990000  | -2.986498000 |
| H  | -0.357727000 | 4.011213000  | -2.866866000 |
| H  | 1.098580000  | 3.064489000  | -2.513932000 |
| C  | -1.965426000 | 3.039486000  | -0.880809000 |
| H  | -2.336954000 | 3.046489000  | 0.147997000  |
| H  | -2.335927000 | 3.945598000  | -1.370711000 |
| H  | -2.394923000 | 2.177184000  | -1.396444000 |
| C  | 0.142951000  | 4.241334000  | -0.202500000 |
| H  | -0.105253000 | 4.235831000  | 0.862670000  |
| H  | 1.230571000  | 4.291278000  | -0.299715000 |
| H  | -0.276354000 | 5.156486000  | -0.632831000 |
| C  | -0.432317000 | 3.035044000  | -0.951909000 |
| P  | 0.182853000  | 1.444797000  | -0.183033000 |
| O  | 0.742523000  | 1.649229000  | 2.451003000  |
| C  | -0.412823000 | 1.529016000  | 1.606721000  |
| H  | 5.233850000  | 1.979838000  | 2.238696000  |
| H  | 5.214266000  | 1.859719000  | -0.207949000 |
| Ir | -0.297151000 | -0.512730000 | -1.135848000 |
| H  | -1.438902000 | 0.165213000  | -2.050263000 |
| H  | 0.727595000  | -0.154225000 | -2.338141000 |
| Cl | -0.683380000 | -2.709830000 | -2.333602000 |
| H  | -1.006871000 | 2.432672000  | 1.749488000  |
| H  | -0.706495000 | -0.213613000 | 2.818394000  |
| H  | 1.729681000  | -1.268600000 | -0.490246000 |
| H  | 0.824162000  | -1.356569000 | -0.112995000 |

|   |             |              |              |
|---|-------------|--------------|--------------|
| C | 3.544051000 | -1.459479000 | 0.545607000  |
| O | 3.004794000 | -1.409382000 | -0.603022000 |
| O | 3.022231000 | -1.403248000 | 1.648012000  |
| C | 5.076270000 | -1.695498000 | 0.493548000  |
| F | 5.324605000 | -3.016363000 | 0.423972000  |
| F | 5.660335000 | -1.127744000 | -0.568965000 |
| F | 5.687381000 | -1.231250000 | 1.587196000  |

---

**TS<sub>15c-II</sub>**

| Coordinates (Angstroms) |              |             |              |
|-------------------------|--------------|-------------|--------------|
|                         | X            | Y           | Z            |
| C                       | -1.924309000 | 4.248311000 | -1.935405000 |
| C                       | -1.036953000 | 3.688792000 | -1.024767000 |
| C                       | -1.436722000 | 2.754961000 | -0.080539000 |
| C                       | -2.764980000 | 2.316700000 | -0.065732000 |
| C                       | -3.676557000 | 2.861680000 | -0.969525000 |
| C                       | -3.242339000 | 3.820195000 | -1.884269000 |
| H                       | -1.583829000 | 4.977755000 | -2.659577000 |
| H                       | -4.710755000 | 2.545042000 | -0.973818000 |
| H                       | -3.959561000 | 4.234021000 | -2.584692000 |
| O                       | -3.066506000 | 1.366365000 | 0.839828000  |
| C                       | -4.430097000 | 1.013217000 | 1.036108000  |
| H                       | -5.005531000 | 1.877216000 | 1.383528000  |
| H                       | -4.875059000 | 0.615391000 | 0.122387000  |
| H                       | -4.427081000 | 0.243084000 | 1.805675000  |
| O                       | 0.280158000  | 4.033021000 | -1.052720000 |
| P                       | -0.032885000 | 2.231657000 | 0.930896000  |
| C                       | 1.094770000  | 3.268499000 | -0.156010000 |
| C                       | -0.174622000 | 3.242122000 | 2.513346000  |
| C                       | -0.232012000 | 4.743996000 | 2.199409000  |
| H                       | -1.040267000 | 4.986925000 | 1.503886000  |
| H                       | -0.431956000 | 5.278452000 | 3.133918000  |

|   |              |              |              |
|---|--------------|--------------|--------------|
| H | 0.706008000  | 5.135433000  | 1.800612000  |
| C | -1.463488000 | 2.867738000  | 3.255864000  |
| H | -1.523687000 | 1.798122000  | 3.454760000  |
| H | -1.476524000 | 3.400340000  | 4.213254000  |
| H | -2.349909000 | 3.173926000  | 2.693874000  |
| C | 1.055600000  | 2.929958000  | 3.368840000  |
| H | 1.063115000  | 1.884276000  | 3.683846000  |
| H | 1.986453000  | 3.132120000  | 2.828531000  |
| H | 1.040933000  | 3.562661000  | 4.262573000  |
| C | 5.547465000  | 1.607263000  | -0.301087000 |
| C | 6.328513000  | 0.515461000  | -0.648177000 |
| C | 5.778034000  | -0.630361000 | -1.217426000 |
| C | 4.399204000  | -0.708573000 | -1.414773000 |
| C | 3.583174000  | 0.358753000  | -1.026943000 |
| C | 4.180914000  | 1.508141000  | -0.520756000 |
| H | 5.974165000  | 2.516625000  | 0.103309000  |
| O | 3.780841000  | -1.756545000 | -1.992349000 |
| C | 4.567031000  | -2.779708000 | -2.585513000 |
| H | 3.857089000  | -3.489225000 | -3.008456000 |
| H | 5.195956000  | -2.372417000 | -3.382888000 |
| H | 5.191876000  | -3.289375000 | -1.847275000 |
| C | 0.849138000  | -1.231065000 | -2.900650000 |
| H | 0.338454000  | -1.619978000 | -2.023061000 |
| H | 0.203991000  | -1.389055000 | -3.770955000 |
| H | 1.767901000  | -1.798390000 | -3.040597000 |
| C | -0.174259000 | 1.053723000  | -2.905140000 |
| H | 0.002717000  | 2.131077000  | -2.870125000 |
| H | -0.607029000 | 0.820018000  | -3.882922000 |
| H | -0.906411000 | 0.791925000  | -2.137327000 |
| C | 2.138930000  | 0.714893000  | -3.809260000 |
| H | 2.354284000  | 1.785324000  | -3.763178000 |
| H | 3.081049000  | 0.167878000  | -3.732118000 |

|    |              |              |              |
|----|--------------|--------------|--------------|
| H  | 1.712580000  | 0.507533000  | -4.796626000 |
| C  | 1.132292000  | 0.266460000  | -2.745438000 |
| P  | 1.774779000  | 0.584336000  | -1.009772000 |
| O  | 3.361487000  | 2.560195000  | -0.246259000 |
| C  | 2.103109000  | 2.438767000  | -0.927391000 |
| H  | 7.401469000  | 0.560049000  | -0.497424000 |
| H  | 6.426792000  | -1.444722000 | -1.510229000 |
| Ir | 0.598280000  | 0.008335000  | 0.837695000  |
| H  | -0.775215000 | -0.316453000 | -0.020991000 |
| H  | 0.888749000  | -1.707991000 | 0.769066000  |
| Cl | -0.617924000 | -0.505105000 | 2.986021000  |
| H  | 2.213632000  | 2.852037000  | -1.933458000 |
| H  | 1.662303000  | 3.971498000  | 0.452577000  |
| C  | -1.925553000 | -2.775953000 | -1.413341000 |
| C  | -0.901549000 | -3.789019000 | -0.919779000 |
| C  | -1.761461000 | -3.573106000 | 1.307089000  |
| C  | -2.793702000 | -2.569103000 | 0.818562000  |
| C  | -4.184683000 | -1.999983000 | -1.064276000 |
| C  | -4.032503000 | -1.011428000 | -2.042291000 |
| C  | -5.115790000 | -0.259006000 | -2.487696000 |
| C  | -6.380532000 | -0.459070000 | -1.954082000 |
| C  | -6.561442000 | -1.432797000 | -0.975342000 |
| C  | -5.479381000 | -2.179536000 | -0.562426000 |
| H  | -2.182185000 | -3.024167000 | -2.446009000 |
| H  | -0.020361000 | -3.747154000 | -1.552118000 |
| H  | -2.181452000 | -4.584363000 | 1.256481000  |
| H  | -2.403429000 | -1.552854000 | 0.951164000  |
| H  | -3.053999000 | -0.819535000 | -2.463608000 |
| H  | -4.956490000 | 0.499206000  | -3.246111000 |
| H  | -7.225182000 | 0.128876000  | -2.293460000 |
| H  | -7.533973000 | -1.630344000 | -0.539533000 |
| N  | -3.132566000 | -2.813712000 | -0.593635000 |

|   |              |              |              |
|---|--------------|--------------|--------------|
| N | -0.554914000 | -3.556397000 | 0.478823000  |
| H | -3.685949000 | -2.680023000 | 1.433740000  |
| H | -1.529283000 | -3.353681000 | 2.342552000  |
| H | -1.319846000 | -4.799009000 | -0.996223000 |
| H | -1.477216000 | -1.777284000 | -1.395781000 |
| C | 0.673041000  | -3.223549000 | 0.921214000  |
| C | 0.904292000  | -3.402295000 | 2.412406000  |
| C | 1.862891000  | -3.602870000 | 0.049492000  |
| C | 2.283956000  | -3.007781000 | 2.921844000  |
| H | 0.157216000  | -2.855197000 | 2.979910000  |
| C | 3.212413000  | -3.185139000 | 0.629944000  |
| H | 1.824724000  | -4.697087000 | -0.038290000 |
| C | 3.393013000  | -3.616935000 | 2.077903000  |
| H | 2.373310000  | -1.916816000 | 2.907765000  |
| H | 3.302633000  | -2.096843000 | 0.573927000  |
| H | 4.372961000  | -3.295750000 | 2.443414000  |
| H | 1.760621000  | -3.190640000 | -0.952604000 |
| H | 0.742904000  | -4.474592000 | 2.588124000  |
| H | 2.362646000  | -3.324382000 | 3.965998000  |
| H | 3.362604000  | -4.711813000 | 2.151053000  |
| H | 3.999055000  | -3.608563000 | 0.002468000  |
| F | -5.686289000 | -3.141950000 | 0.366261000  |
| H | 1.994789000  | 0.245913000  | 1.744766000  |

---

**A3'**

| Coordinates (Angstroms) |             |              |              |
|-------------------------|-------------|--------------|--------------|
|                         | X           | Y            | Z            |
| C                       | 4.189932000 | 1.207443000  | -0.230626000 |
| C                       | 3.299713000 | 2.421171000  | 0.103479000  |
| C                       | 1.820864000 | 2.024940000  | 0.247682000  |
| C                       | 1.451335000 | 0.907018000  | -0.726196000 |
| C                       | 3.566309000 | -0.089090000 | 0.283892000  |

---

|   |              |              |              |
|---|--------------|--------------|--------------|
| H | 4.326197000  | 1.121876000  | -1.312845000 |
| H | 3.637144000  | 2.888118000  | 1.033037000  |
| H | 1.622570000  | 1.704406000  | 1.275038000  |
| H | 0.379745000  | 0.701462000  | -0.713045000 |
| H | 5.184669000  | 1.330392000  | 0.202252000  |
| H | 3.405143000  | 3.172747000  | -0.684267000 |
| H | 1.175522000  | 2.886925000  | 0.064537000  |
| H | 1.683412000  | 1.228086000  | -1.744415000 |
| C | 2.277678000  | -0.366850000 | -0.492739000 |
| O | 2.561595000  | -0.918570000 | -1.743089000 |
| C | -2.555694000 | -0.535405000 | -1.303245000 |
| C | -2.281071000 | -0.367457000 | 0.060744000  |
| C | -2.977662000 | 0.667766000  | 0.700408000  |
| C | -3.853449000 | 1.510319000  | 0.050832000  |
| C | -4.099327000 | 1.323395000  | -1.305065000 |
| C | -3.454062000 | 0.290389000  | -1.969993000 |
| H | -2.060776000 | -1.318629000 | -1.862418000 |
| H | -4.349009000 | 2.288268000  | 0.620244000  |
| H | -4.790771000 | 1.974655000  | -1.826160000 |
| H | -3.635065000 | 0.124967000  | -3.026072000 |
| C | -0.436265000 | -0.475629000 | 1.658617000  |
| C | -0.863359000 | -2.372175000 | 0.175977000  |
| C | 0.935800000  | -1.128744000 | 1.634517000  |
| H | -0.358508000 | 0.570252000  | 1.359309000  |
| C | 0.397219000  | -2.084326000 | -0.621920000 |
| H | -0.667628000 | -3.116511000 | 0.951091000  |
| H | 0.918492000  | -2.076014000 | 2.170966000  |
| H | 0.187545000  | -1.385415000 | -1.427662000 |
| F | -2.802071000 | 0.839048000  | 2.033404000  |
| N | -1.403872000 | -1.173542000 | 0.795493000  |
| N | 1.462649000  | -1.458363000 | 0.260488000  |
| H | 2.155220000  | -2.191174000 | 0.427089000  |



|   |              |              |              |
|---|--------------|--------------|--------------|
| H | -1.602023000 | -2.817833000 | -0.488576000 |
| H | -0.753113000 | -0.486841000 | 2.704911000  |
| H | 1.649301000  | -0.481899000 | 2.137276000  |
| H | 0.815623000  | -2.991770000 | -1.051367000 |
| H | 3.268981000  | -1.569014000 | -1.663043000 |
| H | 3.372589000  | 0.007712000  | 1.353793000  |
| H | 4.241415000  | -0.940897000 | 0.154352000  |

---

**TS<sub>A3'-3'</sub>**

| Coordinates (Angstroms) |              |              |              |
|-------------------------|--------------|--------------|--------------|
|                         | X            | Y            | Z            |
| C                       | 3.380856000  | 1.426318000  | 1.236056000  |
| C                       | 3.101372000  | 2.415445000  | 0.092780000  |
| C                       | 1.632819000  | 2.351527000  | -0.309406000 |
| C                       | 1.281442000  | 0.971904000  | -0.881729000 |
| C                       | 2.426548000  | 0.212937000  | 1.236654000  |
| H                       | 4.416879000  | 1.079038000  | 1.187251000  |
| H                       | 3.377684000  | 3.427354000  | 0.397073000  |
| H                       | 1.006856000  | 2.558760000  | 0.565407000  |
| H                       | 0.207735000  | 0.806286000  | -0.784269000 |
| H                       | 3.268007000  | 1.924903000  | 2.201334000  |
| H                       | 3.717794000  | 2.166487000  | -0.778633000 |
| H                       | 1.394021000  | 3.111211000  | -1.056577000 |
| H                       | 1.525821000  | 0.928645000  | -1.944695000 |
| C                       | 1.996707000  | -0.166417000 | -0.165936000 |
| O                       | 3.244622000  | -0.574027000 | -0.954879000 |
| C                       | -2.211934000 | 0.279294000  | -1.407057000 |
| C                       | -2.077260000 | -0.347776000 | -0.157849000 |
| C                       | -2.771125000 | 0.259614000  | 0.900561000  |
| C                       | -3.494185000 | 1.425030000  | 0.766533000  |
| C                       | -3.593780000 | 2.031447000  | -0.480964000 |
| C                       | -2.959823000 | 1.439861000  | -1.564866000 |

|   |              |              |              |
|---|--------------|--------------|--------------|
| H | -1.706817000 | -0.134521000 | -2.270320000 |
| H | -3.992382000 | 1.830267000  | 1.639914000  |
| H | -4.163611000 | 2.945326000  | -0.598066000 |
| H | -3.029306000 | 1.890281000  | -2.548739000 |
| C | -0.521074000 | -1.658473000 | 1.248645000  |
| C | -0.836275000 | -2.261689000 | -1.090379000 |
| C | 0.865457000  | -2.197009000 | 0.892739000  |
| H | -0.411804000 | -0.686349000 | 1.730205000  |
| C | 0.577953000  | -1.829518000 | -1.497648000 |
| H | -0.834467000 | -3.320204000 | -0.818504000 |
| H | 0.827666000  | -3.261885000 | 0.661122000  |
| H | 0.546724000  | -0.955467000 | -2.142997000 |
| F | -2.758355000 | -0.338523000 | 2.118702000  |
| N | -1.346394000 | -1.512360000 | 0.041815000  |
| N | 1.427543000  | -1.538817000 | -0.298388000 |
| H | 2.761573000  | -1.593333000 | -0.741715000 |
| H | -1.508368000 | -2.171149000 | -1.942446000 |
| H | -0.979073000 | -2.339939000 | 1.973141000  |
| H | 1.532306000  | -2.088731000 | 1.743662000  |
| H | 1.053817000  | -2.637553000 | -2.057004000 |
| H | 4.077077000  | -0.419075000 | -0.481675000 |
| H | 1.515913000  | 0.450547000  | 1.791490000  |
| H | 2.909949000  | -0.628702000 | 1.732976000  |

---

**TS<sub>A3\*-A3'</sub>**

---

| Coordinates (Angstroms) |              |             |              |
|-------------------------|--------------|-------------|--------------|
|                         | X            | Y           | Z            |
| C                       | 0.793441000  | 3.062583000 | 1.394708000  |
| C                       | -0.093798000 | 3.924907000 | 0.474336000  |
| C                       | -1.330032000 | 3.150991000 | 0.027701000  |
| C                       | -0.959750000 | 1.893963000 | -0.767763000 |
| C                       | 0.542272000  | 1.549195000 | 1.254073000  |

---

|   |              |              |              |
|---|--------------|--------------|--------------|
| H | 1.851800000  | 3.271925000  | 1.221827000  |
| H | -0.383683000 | 4.841102000  | 0.989521000  |
| H | -1.918084000 | 2.866724000  | 0.906028000  |
| H | -1.808228000 | 1.208001000  | -0.783539000 |
| H | 0.608707000  | 3.322637000  | 2.437955000  |
| H | 0.461346000  | 4.265512000  | -0.411442000 |
| H | -1.980383000 | 3.775370000  | -0.586393000 |
| H | -0.732635000 | 2.143815000  | -1.807045000 |
| C | 0.193352000  | 1.111758000  | -0.148226000 |
| O | 1.546782000  | 1.766123000  | -1.099561000 |
| C | -4.140833000 | -0.134456000 | -1.225063000 |
| C | -3.538528000 | -0.852926000 | -0.183439000 |
| C | -4.379815000 | -1.270047000 | 0.850074000  |
| C | -5.730612000 | -0.978124000 | 0.873851000  |
| C | -6.300488000 | -0.273575000 | -0.175031000 |
| C | -5.499153000 | 0.139681000  | -1.232063000 |
| H | -3.527316000 | 0.212145000  | -2.050237000 |
| H | -6.319564000 | -1.335038000 | 1.709664000  |
| H | -7.361078000 | -0.057112000 | -0.167887000 |
| H | -5.929251000 | 0.686824000  | -2.061903000 |
| C | -1.396193000 | -1.358617000 | 1.003557000  |
| C | -1.511575000 | -1.607519000 | -1.397652000 |
| C | 0.101846000  | -1.217564000 | 0.680032000  |
| H | -1.696191000 | -0.640670000 | 1.770608000  |
| C | -0.235587000 | -0.783750000 | -1.679412000 |
| H | -1.257528000 | -2.669812000 | -1.273378000 |
| H | 0.506759000  | -2.169390000 | 0.329081000  |
| H | -0.434659000 | 0.043485000  | -2.356778000 |
| F | -3.873665000 | -1.994078000 | 1.869910000  |
| N | -2.152049000 | -1.090779000 | -0.206179000 |
| N | 0.331479000  | -0.247633000 | -0.417565000 |
| H | 2.104347000  | -0.799719000 | -0.569161000 |

|   |              |              |              |
|---|--------------|--------------|--------------|
| H | -2.187934000 | -1.548999000 | -2.247905000 |
| H | -1.563282000 | -2.361568000 | 1.414469000  |
| H | 0.668365000  | -0.952635000 | 1.569576000  |
| H | 0.521568000  | -1.413101000 | -2.156409000 |
| H | 1.525866000  | 2.728575000  | -1.169483000 |
| H | -0.316744000 | 1.259522000  | 1.869856000  |
| H | 1.405142000  | 0.998580000  | 1.630161000  |
| C | 5.270853000  | -1.013661000 | 0.101197000  |
| C | 3.896358000  | -0.362192000 | -0.171448000 |
| O | 2.987258000  | -1.238248000 | -0.495496000 |
| O | 3.723274000  | 0.831966000  | -0.058460000 |
| H | 2.414994000  | 1.495153000  | -0.678690000 |
| F | 6.205853000  | -0.086692000 | 0.168313000  |
| F | 5.204937000  | -1.659957000 | 1.264645000  |
| F | 5.567607000  | -1.877611000 | -0.859616000 |

---

## 7. Experimental part.

**General methods.** All reactions were carried out under an inert atmosphere of nitrogen using Schlenk line techniques with a dual-bank manifold, unless otherwise noted. All reagents were purchased commercially and used as received, unless otherwise noted. Methanol anhydrous 99.8% was dried under argon atmosphere. Analytical thin-layer chromatography (TLC) was performed on 0.25 mm Merck precoated silica gel plates (60-F254). TLC analysis was performed using hexanes/CH<sub>2</sub>Cl<sub>2</sub>, CH<sub>2</sub>Cl<sub>2</sub>/MeOH or hexanes/AcOEt as the eluent and stained using permanganate stain, ninhydrin stain, and/or UV light (254 nm). Column chromatography was carried out with the same type of silica gel and a Teledyne Isco Combiflash<sup>(R)</sup> using RediSep Rf Gold Normal-Phase Silica<sup>(R)</sup> columns (60 Å porosity, 20–40 μm). <sup>1</sup>H NMR, <sup>13</sup>C NMR and <sup>19</sup>F NMR were recorded with Bruker FT spectrometers at 300 K unless otherwise noted. <sup>1</sup>H (400, 500 or 600 MHz) and <sup>13</sup>C {<sup>1</sup>H} (100, 126 or 151 MHz) NMR chemical shifts are reported relative to internal TMS (δ = 0.00 ppm) CDCl<sub>3</sub> (δ = 7.26 ppm; <sup>13</sup>C NMR: CDCl<sub>3</sub> at 77.16 ppm) or to residual protiated solvent, and <sup>19</sup>F {<sup>1</sup>H} NMR (471 MHz) chemical shifts were referenced to external CFCl<sub>3</sub> (0.0 ppm). Chemical shifts are reported in parts per million (ppm). Data are presented as follows: chemical shift (ppm), multiplicity (s = singlet, d = doublet, t = triplet, q = quartet, sept = septet, m = multiplet), coupling constant J (Hz) and integration.

**General procedure of the iridium-catalyzed direct reductive amination – synthesis and characterization of amine 3.** In an oven dried vial equipped with a stirring bar was added ketone (1.5 mmol, 3 equiv.), amine (0.5 mmol, 1 equiv.), ligand (12.5 mg, 0.022 mmol, 4.4 mol%), [Ir(COD)Cl]<sub>2</sub> (6.7 mg, 0.01 mmol, 2 mol%), anhydrous MeOH (5 mL) and trifluoroacetic acid (17.1 mg, 11.5 μL, 0.15 mmol, 30 mol%) under inert atmosphere. The vial was placed in an autoclave, which was then sealed, and purged (replacing air with 5 bar of H<sub>2</sub>, three times). The autoclave was charged with 50 bar of H<sub>2</sub> and the reaction mixture was stirred at room temperature for 24 h. Then, the hydrogen from the autoclave was released. LC- and/or GC-MS analysis were performed to calculate the conversion of amine –limiting reagent-. Next, the solution was poured into NaOH 1 M (30 mL). Extraction with ethyl acetate (3 x 20 mL) and drying the organic layer with MgSO<sub>4</sub> before concentration to dryness under reduced pressure afforded a crude residue that was further purified by column chromatography on silica gel (heptane: ethyl acetate 1:0 to 2:1 with 1% triethylamine) to afford the tertiary amine product **3** (remark: no glovebox was required for this experiment). <sup>1</sup>H NMR (500 MHz, CDCl<sub>3</sub>): δ = 7.08–7.04 (m, 1H), 7.06–6.98 (m, 1H), 7.00–6.91 (m, 1H), 6.92 (ddd, J = 7.9, 4.1, 1.4, 1H), 3.16–3.10 (m, 4H), 2.82–2.74 (m, 4H), 2.32 (ddq, J = 11.0, 7.1, 3.4, 1H), 1.93 (dd, J = 9.1, 4.0, 2H), 1.87–1.77 (m, 2H), 1.69–1.61 (m, 1H), 1.26 (td, J = 9.3, 7.1, 4.2, 4H), 1.14 (ddt, J = 16.2, 12.3, 6.1, 1H) ppm. <sup>13</sup>C {<sup>1</sup>H} NMR (126 MHz, CDCl<sub>3</sub>): δ = 155.76 (d, J<sub>C3,F</sub> = 245.9), 140.31 (d, J<sub>C4,F</sub> = 8.3), 124.43 (d, J<sub>C6,F</sub> = 3.7), 122.26 (d, J<sub>C1,F</sub> = 8.0), 118.88 (d, J<sub>C5,F</sub> = 3.2), 116.03 (d, J<sub>C2,F</sub> = 20.7), 63.58, 51.06, 49.08, 29.01, 26.35, 25.91 ppm. <sup>19</sup>F {<sup>1</sup>H} NMR (471 MHz, CDCl<sub>3</sub>): δ = -122.68 ppm. GC: t<sub>R</sub> = 12.5 min; MS (EI): m/z = 262 (M<sup>+</sup>, 53), 219 (100), 150 (21). HRMS (ESI): m/z calcd for C<sub>16</sub>H<sub>24</sub>N<sub>2</sub>F 263.1918 [M+H]<sup>+</sup>, found: 263.1918 (0 ppm). The spectroscopic data match those reported previously.<sup>1</sup>

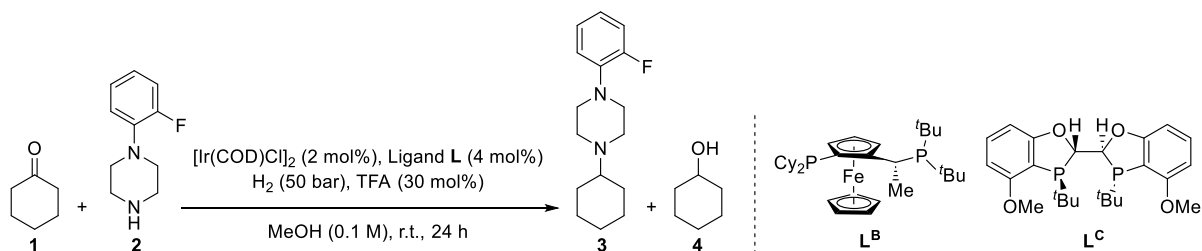

| Entry | Ligand         | Conversion of 2 | Yield of 3 |
|-------|----------------|-----------------|------------|
| 1     | L <sup>B</sup> | 68              | 39         |
| 2     | L <sup>C</sup> | 72              | 41         |

GC-MS results showing formation of cyclohexanol 4 (ca. 15% yield):

Sample Information

Analyzed : 26/05/2021 16:53:43  
 Sample Type : Unknown  
 Level # : 1  
 Sample Name : TMN55\_xtp  
 Sample ID :

Data File : D:\Rafa\Thi Mo\NTM55\_xtp.qgd  
 Org Data File : D:\Rafa\Thi Mo\NTM55\_xtp.qgd  
 Method File : D:\Rafa\Thi Mo\Method\_C.qgm  
 Org Method File : D:\Rafa\Thi Mo\Method\_C.qgm  
 Report File :  
 Tuning File : C:\GCMSsolution\System1\Tune1\2021-03-30 B1S.qgt  
 Modified by : Admin  
 Modified : 13/07/2021 16:52:38

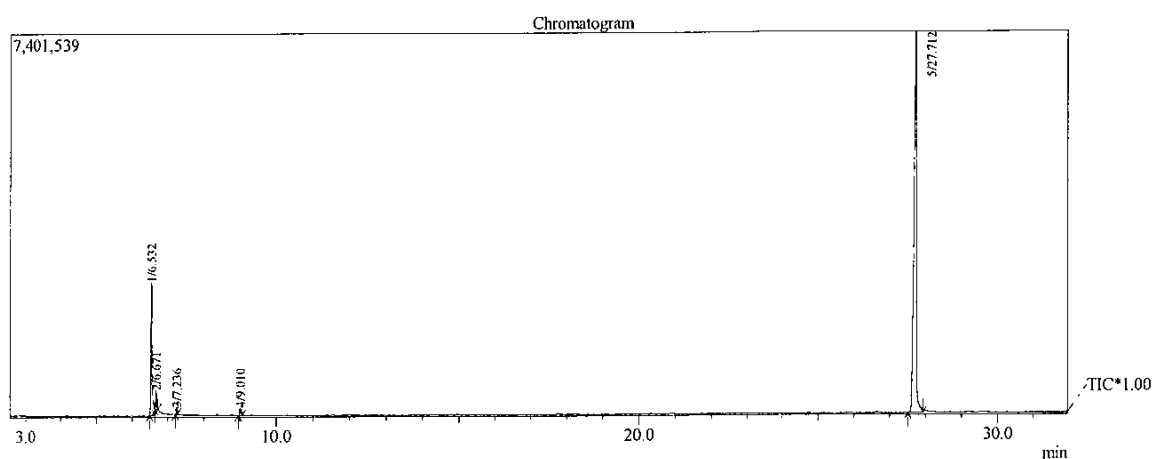

| Peak# | R. Time | I. Time | F. Time | Area     | Area%  | Height   | Height% | A/H  | Mark | Name |
|-------|---------|---------|---------|----------|--------|----------|---------|------|------|------|
| 1     | 6.532   | 6.490   | 6.637   | 6350719  | 14.38  | 2567673  | 24.28   | 2.47 | MI   |      |
| 2     | 6.671   | 6.643   | 6.730   | 703490   | 1.59   | 364737   | 3.45    | 1.93 | MI   |      |
| 3     | 7.236   | 7.203   | 7.270   | 257490   | 0.58   | 127984   | 1.21    | 2.01 | MI   |      |
| 4     | 9.010   | 8.963   | 9.070   | 333208   | 0.75   | 151060   | 1.43    | 2.21 | MI   |      |
| 5     | 27.712  | 27.510  | 27.930  | 36512624 | 82.69  | 7365932  | 69.64   | 4.96 | MI   |      |
|       |         |         |         | 44157531 | 100.00 | 10577386 | 100.00  |      |      |      |



9. NMR data.

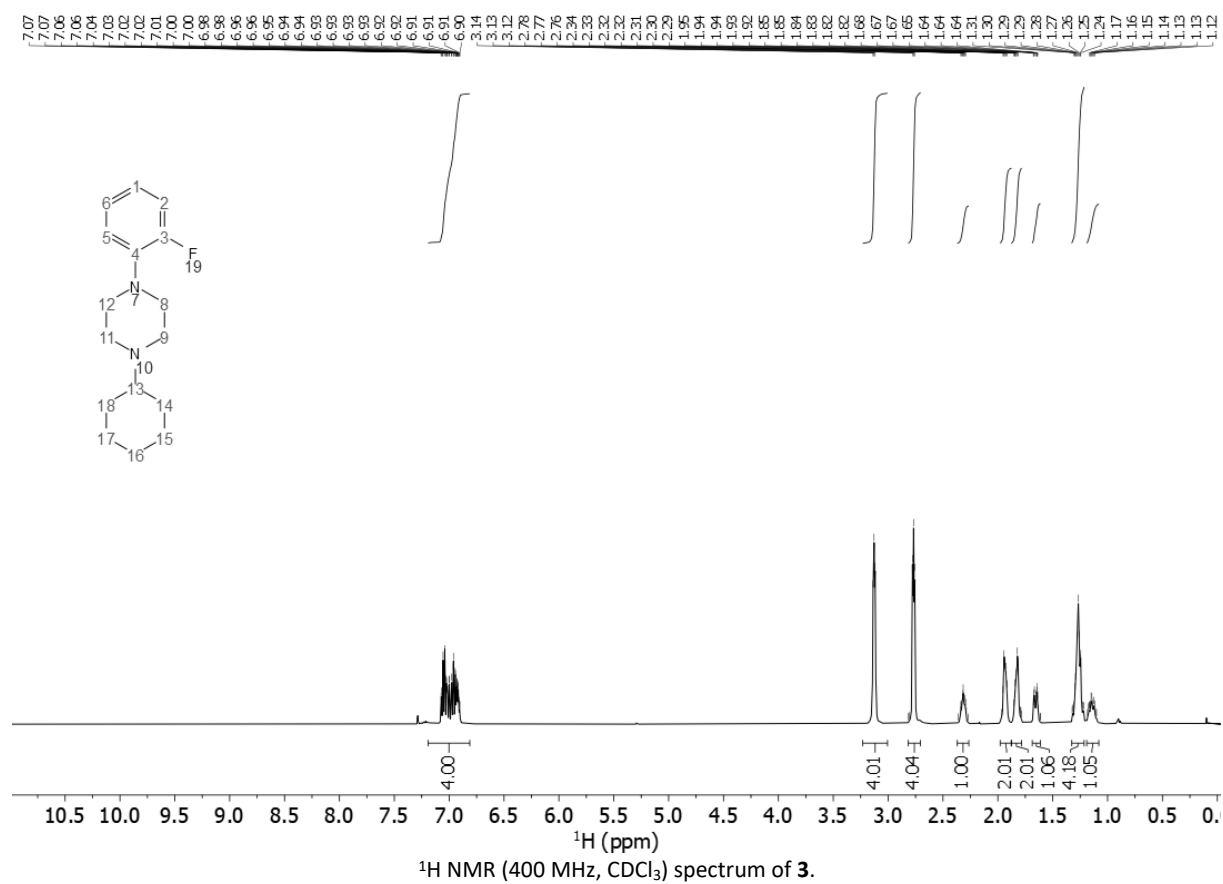



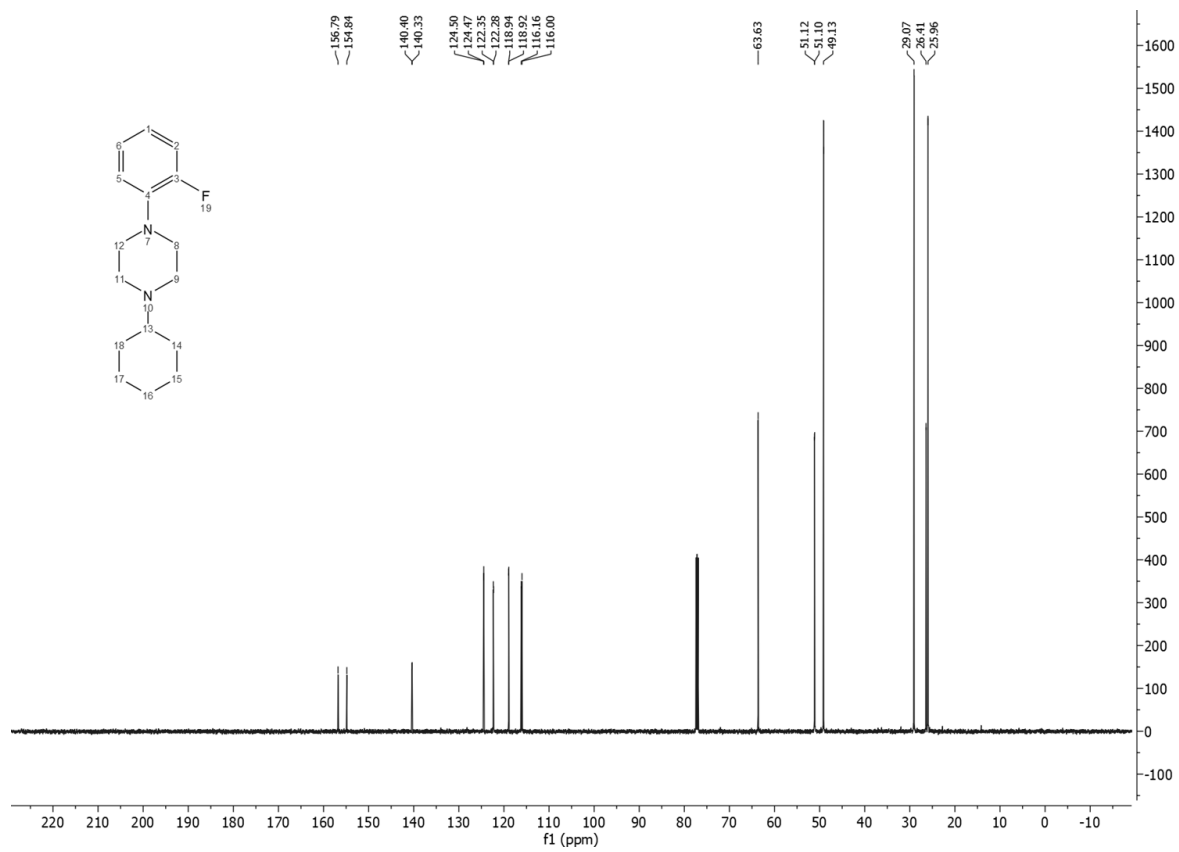

<sup>13</sup>C{<sup>1</sup>H} NMR (101 MHz, CDCl<sub>3</sub>) spectrum of **3**.

tnghuyen2 NTM553sp\_P.12.fid

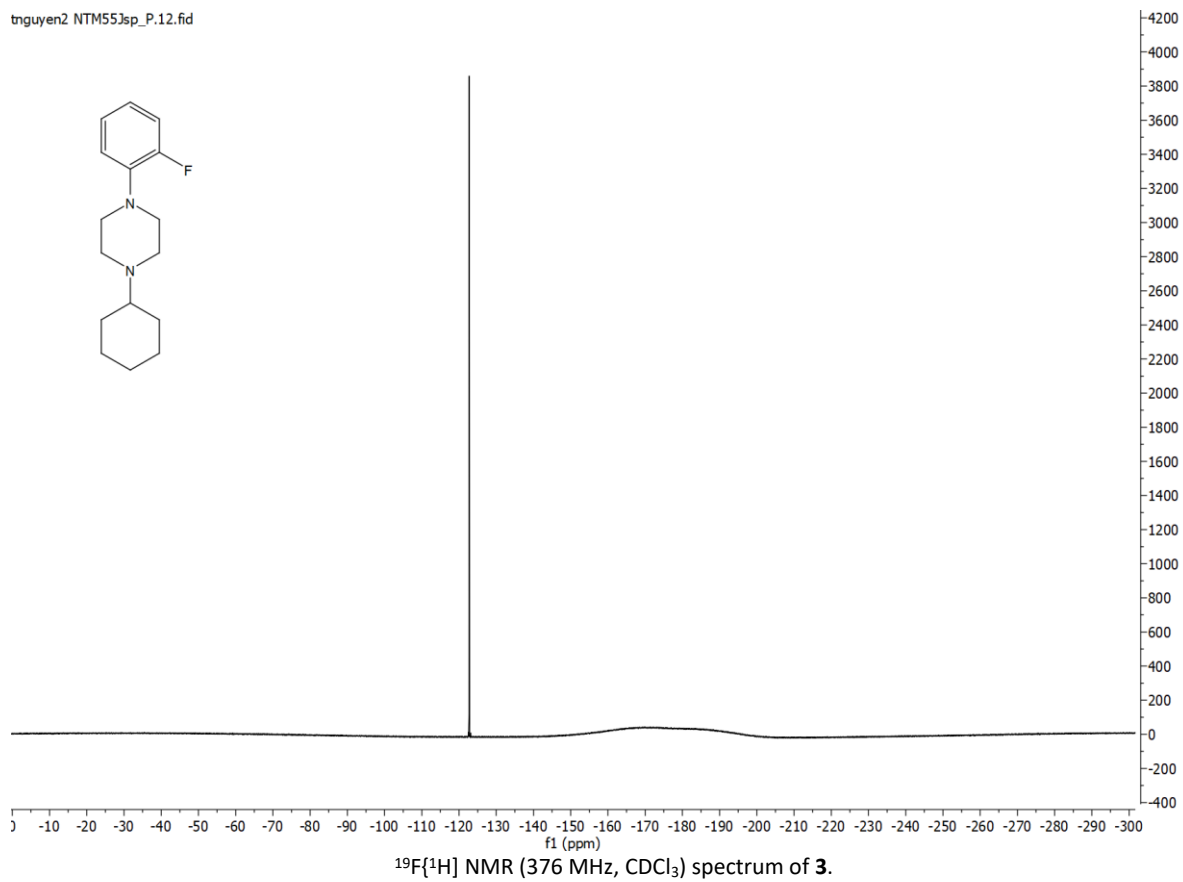

Supplement: d4cy00516c1.pdf [file d4cy00516c1.pdf]
